# Supplementary material for: In-Depth Proteomic Analysis of the Hippocampus in a Rat Model after Cerebral Ischaemic Injury and Repair by Danhong Injection (DHI)
Source: Int J Mol Sci. 2017 Jun 24;18(7):1355. doi: 10.3390/ijms18071355 (PMC5535848; doi:10.3390/ijms18071355)
Supplement: Supplementary file 1 [file ijms-18-01355-s001.xlsx]

## Sheet: Quantification
Accession	Naive1	Naive2	Naive3	Sham1	Sham2	Sham3	MCAO1	MCAO2	MCAO3	MCAO+DHI1	MCAO+DHI2	MCAO+DHI3
D4A133	6.7064e-05	7.31695e-05	6.82978e-05	5.84869e-05	7.75914e-05	5.87716e-05	7.79955e-05	6.3472e-05	6.83319e-05	7.99566e-05	6.20348e-05	5.26118e-05
Q5XIF6	0.000772879	0.00120823	0.00130748	0.00147004	0.00150382	0.000440943	0.0011382	0.000927438	0.00135065	0.00144203	0.00158663	0.000313008
V9GZ85	0.00109001	0.00183288	0.00167924	0.0015723	0.00167736	0.000859365	0.00145065	0.000989027	0.00134879	0.00144755	0.00177299	0.00065988
P04642	0.00015876	0.000137231	0.0001196	6.5498e-05	0.000163981	0.000118773	0.000152194	0.000152375	0.000119132	0.000151937	0.000149945	6.51403e-05
Q9QYU4	3.74386e-05	3.84866e-05	4.22674e-05	3.54989e-05	4.53511e-05	2.80032e-05	3.719e-05	5.72721e-05	4.11275e-05	3.3401e-05	5.80762e-05	4.23078e-05
P50398	7.58978e-05	8.924e-05	8.40863e-05	8.8021e-05	8.27353e-05	6.71264e-05	9.11006e-05	7.94908e-05	7.54275e-05	8.72226e-05	8.45118e-05	6.05142e-05
Q00981	0.00015539	0.000179788	0.000141765	0.000181255	0.000165015	0.000136566	0.000188867	0.000137728	0.000161923	0.000183845	0.000174006	0.000128262
Q63716	3.48855e-05	3.62131e-05	3.69069e-05	4.01696e-05	4.15043e-05	2.42085e-05	3.75939e-05	3.45192e-05	4.05087e-05	4.26741e-05	4.45033e-05	2.1841e-05
P85973	9.44857e-06	1.42389e-05	1.39295e-05	1.31835e-05	1.25517e-05	5.73724e-06	1.43652e-05	1.14334e-05	1.32697e-05	1.59158e-05	1.37674e-05	5.91126e-06
P48500	0.000207513	0.000170352	0.00018102	0.000190866	0.000189833	0.000153997	0.000187522	0.000165641	0.00018624	0.000205362	0.000180402	0.000171422
P07323	0.000120651	0.000205353	0.000190562	0.000168428	0.000197454	7.06712e-05	0.000186579	0.000123753	0.000176171	0.00018085	0.000177917	0.000101466
P05065	0.000223062	0.00025676	0.000199815	0.000250753	0.000268225	0.000162133	0.000260842	0.000179274	0.000215319	0.000268628	0.000226793	9.91078e-05
P09117	6.18297e-05	8.49542e-05	7.45269e-05	7.11565e-05	8.18014e-05	6.14401e-05	8.39653e-05	7.43938e-05	7.29923e-05	9.43015e-05	8.69721e-05	6.55257e-05
P04797	0.000391531	0.000880168	0.000852441	0.00083116	0.000910724	0.000263839	0.000907977	0.000712933	0.000860079	0.000952589	0.000962047	0.000302347
P02091	4.01537e-05	0.000220419	6.54867e-05	0.000299284	0.000187958	0.000124811	0.000282665	0.000328581	0.000472095	0.000659362	0.000250398	4.00446e-05
O88767	3.92668e-05	3.12823e-05	4.02045e-05	4.28028e-05	3.05434e-05	2.05048e-05	3.99223e-05	3.19705e-05	3.97301e-05	3.60299e-05	4.82884e-05	2.25637e-05
P62260	0.000243728	0.00031843	0.000342972	0.000262708	0.000287232	0.000201277	0.000297748	0.000192934	0.000279262	0.000330109	0.000235802	0.000157649
P22062	2.03289e-05	1.89735e-05	1.77176e-05	1.89959e-05	1.50408e-05	1.33527e-05	1.79563e-05	1.36015e-05	1.68489e-05	1.89417e-05	1.63119e-05	1.6587e-05
P42123	0.000170564	0.000170549	0.000149191	8.18562e-05	0.000182933	0.00012927	0.000181019	0.000148419	0.000112253	0.000190338	0.000174517	5.11493e-05
P85108	0.000732502	0.00096305	0.00103673	0.00105696	0.000958975	0.000453219	0.00102753	0.000832522	0.00109059	0.000963414	0.000963465	0.000377973
Q3KRE8	0.000732502	0.00096305	0.00103673	0.00105696	0.000958975	0.000453219	0.00102753	0.000832522	0.00109059	0.000963414	0.000963465	0.000377973
F8WFM2	3.90615e-05	4.44838e-05	4.72363e-05	3.71644e-05	3.99152e-05	2.9338e-05	3.6927e-05	3.77526e-05	3.40686e-05	3.82354e-05	3.83258e-05	2.66121e-05
P47942	0.000307605	0.000295033	0.000302747	0.000367379	0.000340288	0.000217876	0.000348251	0.000207455	0.000339672	0.00032935	0.000326192	0.00017341
B4F7C2	0.00065692	0.00096305	0.00100271	0.000949159	0.000873519	0.000225973	0.000942113	0.000766895	0.00101011	0.000858749	0.0008635	0.000377973
P69897	0.000732502	0.00096305	0.00103673	0.00105696	0.000958975	0.000453219	0.00102753	0.000832522	0.00109059	0.000963414	0.000963465	0.000377973
G3V7C6	0.000672589	0.00096305	0.00102548	0.000949159	0.000878048	0.000453219	0.000942113	0.00077008	0.00103572	0.000877818	0.0008635	0.000377973
P07335	0.000251013	0.000257035	0.000313558	0.00031148	0.000242968	0.000159574	0.000304779	0.000273362	0.000337592	0.000331249	0.000289245	0.00017154
P04631	3.90626e-05	6.093e-05	4.86792e-05	3.54983e-05	3.56533e-05	2.96972e-05	3.70608e-05	4.33119e-05	7.58873e-05	4.95413e-05	4.27368e-05	3.98542e-05
P11275	0.000422165	0.000542705	0.00048321	0.000494924	0.000433771	0.000188424	0.00047126	0.000328333	0.000359269	0.000465775	0.000509759	0.00017859
P63018	0.000184624	0.00023599	0.000193972	0.000200031	0.000206728	0.000142271	0.000223736	0.000204287	0.000221179	0.000246715	0.000270237	0.000139955
P62870	7.5687e-06	6.8009e-06	6.9617e-06	6.36726e-06	7.35515e-06	4.44312e-06	8.41299e-06	4.633e-06	3.5553e-06	6.78625e-06	5.31163e-06	6.22629e-06
P54921	2.91173e-05	3.42632e-05	2.99442e-05	2.98661e-05	2.83063e-05	2.42337e-05	3.10842e-05	2.7562e-05	2.64729e-05	3.1924e-05	2.976e-05	2.27556e-05
P25113	0.000109752	0.000115322	0.000111036	0.000103837	0.000108923	0.000102093	0.000107155	0.000110567	0.000105649	0.00010494	0.000114619	8.97588e-05
G3V6D3	0.000268578	0.000307957	0.000289573	0.000251803	0.000282315	0.000204207	0.000269891	0.000240854	0.000285984	0.000272679	0.000285902	0.000177899
Q4QRB4	0.000708229	0.000902122	0.00101516	0.000996248	0.000929904	0.000234704	0.0010129	0.000784027	0.00109059	0.000954092	0.00094472	0.000240019
P37805	2.914e-05	3.99633e-05	3.80951e-05	2.03595e-05	3.35185e-05	1.45877e-05	3.47066e-05	2.98406e-05	3.79114e-05	2.45217e-05	3.41439e-05	1.55715e-05
P07632	5.09773e-05	6.22296e-05	7.58605e-05	5.6174e-05	6.0554e-05	4.87603e-05	5.24282e-05	4.23857e-05	7.47958e-05	6.62019e-05	6.96026e-05	2.17578e-05
Q6AYZ1	0.00077939	0.00115814	0.00107882	0.0011408	0.0012208	0.000605872	0.0010197	0.000956367	0.00108108	0.00111594	0.00121547	0.000504792
P67779	2.25291e-05	2.07716e-05	2.2528e-05	2.31961e-05	2.26225e-05	1.08302e-05	2.01519e-05	2.27966e-05	1.75204e-05	1.75092e-05	2.45151e-05	1.36091e-05
P50554	3.25825e-05	3.24356e-05	3.25639e-05	3.03893e-05	2.31518e-05	1.76389e-05	3.13503e-05	2.46352e-05	2.07554e-05	2.36761e-05	2.94576e-05	2.56079e-05
Q6PDU7	1.20245e-05	3.42101e-05	3.30145e-05	2.63764e-05	2.85993e-05	2.52779e-05	3.32601e-05	3.343e-05	3.48712e-05	2.87695e-05	3.81073e-05	2.54884e-05
P09951-2	0.000146457	0.000162249	0.00013941	0.000142368	0.000148018	6.61302e-05	0.00015185	0.000126699	0.000130172	0.000163391	0.000153908	8.44455e-05
Q05175	0.000111359	0.000138052	8.23015e-05	0.000102941	0.000108617	4.46191e-05	0.00016375	7.06917e-05	8.97894e-05	0.000170929	0.000123222	8.43676e-05
P16617	0.000109045	0.000120396	0.00011815	0.000110569	0.000112452	6.21776e-05	0.000123537	0.000110891	0.000112063	0.000122183	0.000105882	6.59007e-05
P15999	0.000253916	0.000302977	0.000285755	0.000276212	0.000283171	0.000136995	0.000292721	0.000233644	0.000267094	0.000302519	0.000285164	0.000165548
P27139	2.19878e-05	2.44833e-05	2.15714e-05	2.46864e-05	1.89881e-05	1.87466e-05	2.16033e-05	1.85098e-05	2.6042e-05	3.08411e-05	2.32882e-05	2.31139e-05
Q9JHU0	2.68514e-05	1.98665e-05	2.09422e-05	2.56153e-05	2.85382e-05	9.37577e-06	2.5344e-05	2.37273e-05	2.24124e-05	2.68953e-05	2.47727e-05	1.36263e-05
Q05982	9.62851e-05	0.000105498	6.64652e-05	0.000102208	0.00010353	5.99006e-05	0.000106752	9.14581e-05	7.23297e-05	0.000106991	0.000115895	4.67853e-05
G3V8K2	8.46335e-06	8.03247e-06	7.19023e-06	9.63386e-06	8.65196e-06	6.13464e-06	9.42927e-06	5.9475e-06	7.89986e-06	1.1947e-05	9.30002e-06	6.28476e-06
P08009	2.70801e-05	3.43526e-05	3.44141e-05	3.38241e-05	3.14213e-05	2.69538e-05	3.5843e-05	2.23706e-05	3.04225e-05	3.47514e-05	2.8825e-05	3.06746e-05
P09527	1.30658e-05	1.6774e-05	1.53815e-05	1.34167e-05	1.26455e-05	8.54071e-06	1.51498e-05	1.37595e-05	1.20463e-05	1.54226e-05	1.51213e-05	8.42133e-06
P04905	2.59485e-05	3.48277e-05	3.44141e-05	3.25905e-05	2.99025e-05	2.42897e-05	3.36293e-05	2.01542e-05	3.04225e-05	3.39238e-05	2.75702e-05	2.32086e-05
P09606	7.53782e-05	9.3995e-05	8.96827e-05	8.97175e-05	9.57682e-05	5.86215e-05	9.72092e-05	8.05156e-05	8.08326e-05	9.42302e-05	9.93533e-05	6.69672e-05
B2RYW9	9.48273e-06	1.0526e-05	1.03403e-05	8.88593e-06	1.01129e-05	5.74751e-06	9.33062e-06	8.11629e-06	9.21184e-06	9.15348e-06	9.50707e-06	5.12483e-06
P63086	2.44634e-05	3.28044e-05	2.90622e-05	2.79773e-05	2.60676e-05	1.92307e-05	2.66167e-05	2.69636e-05	2.87217e-05	2.36015e-05	3.42586e-05	1.68177e-05
P07936	4.17526e-05	9.85898e-05	7.33263e-05	9.23532e-05	0.000111375	5.05677e-05	0.000105577	4.5983e-05	8.51389e-05	0.000116982	0.000130244	4.49765e-05
P62959	3.73608e-05	4.21926e-05	3.67085e-05	3.92753e-05	1.98654e-05	2.21992e-05	4.31077e-05	3.30848e-05	3.51005e-05	2.18138e-05	4.28865e-05	2.69279e-05
Q63362	1.37523e-05	1.54479e-05	9.88534e-06	8.06162e-06	1.0016e-05	9.72995e-06	1.29947e-05	9.76931e-06	7.88874e-06	1.48917e-05	1.31141e-05	7.69252e-06
P62815	9.57651e-05	8.72271e-05	8.0087e-05	8.50562e-05	9.01951e-05	5.44828e-05	8.67615e-05	8.24119e-05	8.23269e-05	9.22402e-05	8.50217e-05	5.67386e-05
P01946	4.22245e-05	0.000203384	6.18234e-05	0.000239346	0.00016297	7.94973e-05	0.000237658	0.000326154	0.000360098	0.000513755	0.000222922	6.77684e-05
P31044	0.000152894	0.000209676	0.000152632	0.000152106	0.000177859	3.03382e-05	0.000222519	0.000126745	0.000214395	0.000208167	0.00019417	8.07197e-05
P02770	1.50006e-05	4.22521e-05	1.65021e-05	3.02286e-05	1.76151e-05	1.44018e-05	8.45839e-05	0.000117137	0.000158727	7.49167e-05	4.00308e-05	1.02968e-05
P61765	9.16523e-05	7.59805e-05	8.42038e-05	8.5019e-05	0.000121914	6.23296e-05	8.71541e-05	8.56695e-05	8.33689e-05	9.56994e-05	8.68108e-05	6.09359e-05
P61983	0.000237338	0.000312232	0.000326061	0.000267562	0.000282651	0.000205011	0.000306035	0.000200668	0.00029453	0.000343504	0.000242141	0.000159946
P50408	9.28391e-06	1.29837e-05	1.2199e-05	1.21616e-05	1.0897e-05	7.64396e-06	1.30528e-05	6.58343e-06	1.1018e-05	1.2408e-05	1.03767e-05	9.30286e-06
P62738	0.000911315	0.00128914	0.00116157	0.00119886	0.00117626	0.00110679	0.000746757	0.000837815	0.00065988	0.00110008	0.00129374	0.0012672
P31399	7.1205e-05	7.42035e-05	7.45911e-05	7.27912e-05	8.21057e-05	5.65498e-05	6.63234e-05	8.0672e-05	5.96474e-05	6.07066e-05	8.14795e-05	5.31427e-05
P16446	9.21982e-06	1.24371e-05	1.04672e-05	8.26415e-06	7.93103e-06	7.10572e-06	7.1174e-06	7.73751e-06	8.93421e-06	8.59705e-06	9.21246e-06	5.6561e-06
Q9Z2L0	7.97761e-05	0.0001264	7.41375e-05	7.52675e-05	8.59653e-05	2.96747e-05	7.48328e-05	9.11838e-05	5.52223e-05	7.8948e-05	9.90861e-05	2.61584e-05
P09951	0.000146457	0.000162249	0.00013941	0.000142368	0.000148018	6.61302e-05	0.00015185	0.000126699	0.000130172	0.000163391	0.000153908	8.44455e-05
P13233	0.000135881	0.000146758	0.000145211	0.000209132	0.000128428	0.000153565	0.000124048	0.000119524	0.000181521	0.000147289	0.000106078	7.23496e-05
Q63560	2.42005e-05	2.33625e-05	2.92081e-05	2.47966e-05	2.6017e-05	2.23297e-05	2.33235e-05	2.28596e-05	2.59943e-05	2.7478e-05	2.62714e-05	1.46219e-05
P63039	5.46769e-05	8.21393e-05	5.33095e-05	6.81544e-05	7.85386e-05	4.06892e-05	6.5053e-05	5.37624e-05	6.46799e-05	7.72044e-05	7.69311e-05	4.06153e-05
Q62950	0.000115209	0.000164038	0.000117896	0.00017306	0.000177686	9.3248e-05	0.000167891	0.000101915	0.000161559	0.000176629	0.000192399	8.17695e-05
M0R5J4	0.000156077	0.000257264	0.000210452	0.000207723	0.000239439	0.000119885	0.000264633	0.000159498	0.000219893	0.000230176	0.000208143	0.000129609
P11980	0.000188793	0.000200434	0.000221572	0.000197847	0.000178709	0.000138407	0.000178397	0.000171935	0.000226476	0.000207452	0.000172521	0.000107483
P11517	3.3072e-05	0.000198951	6.24753e-05	0.000263504	0.00016816	0.000115337	0.000248747	0.000328581	0.000408266	0.000562294	0.000207272	4.00446e-05
F1LQ05	5.19863e-05	6.31822e-05	5.60626e-05	5.92754e-05	6.24084e-05	2.90912e-05	6.06081e-05	4.97793e-05	4.96551e-05	6.61801e-05	6.04103e-05	2.79532e-05
P62775	2.04407e-05	2.8221e-05	2.90904e-05	2.32689e-05	2.50154e-05	2.83988e-05	2.80256e-05	2.69708e-05	2.949e-05	2.67742e-05	3.10504e-05	1.30003e-05
P45592	0.000104923	0.000137116	0.00015129	0.000123206	0.000148026	0.000133421	0.000126628	0.000125847	0.000152485	0.000127375	0.00013609	7.81528e-05
Q09073	0.000283263	0.000257595	0.000289658	0.000229543	0.000256789	0.000234969	0.000262327	0.000269534	0.000283533	0.000276272	0.000237656	0.000125429
O35244	4.19883e-05	4.378e-05	4.20688e-05	4.27911e-05	4.29274e-05	2.97405e-05	4.41187e-05	3.43092e-05	3.74184e-05	4.41728e-05	4.67787e-05	2.62011e-05
D4ADS4	1.72479e-05	1.88693e-05	1.35691e-05	2.5697e-05	2.62154e-05	1.27039e-05	2.65137e-05	1.15197e-05	1.74444e-05	2.16547e-05	1.60165e-05	1.97677e-06
P11980-2	0.000188793	0.000200434	0.000221572	0.000197847	0.00017603	0.000138407	0.00017532	0.000171935	0.000226476	0.000207452	0.000172521	0.000104082
P63102	0.000301511	0.000384857	0.000404637	0.000340528	0.000375947	0.000227445	0.000382387	0.0002971	0.000317715	0.000380256	0.000392861	0.000223247
P61765-2	9.16523e-05	7.59805e-05	8.42038e-05	8.5019e-05	0.000121914	6.23296e-05	8.71541e-05	8.56695e-05	8.33689e-05	9.56994e-05	8.68108e-05	6.09359e-05
P84076	6.07033e-05	9.13465e-05	6.49912e-05	6.43122e-05	5.25896e-05	2.08777e-05	6.4973e-05	5.3247e-05	6.10167e-05	5.98632e-05	6.39789e-05	3.20971e-05
Q7TQ16	6.98642e-06	1.87076e-05	2.09442e-05	1.8829e-05	1.32497e-05	1.13888e-05	1.38036e-05	2.16385e-05	9.15846e-06	1.2094e-05	1.71672e-05	1.25022e-05
Q9JKB7	2.162e-05	2.7594e-05	2.79887e-05	2.53562e-05	2.93109e-05	2.39775e-05	2.9712e-05	2.49858e-05	2.78734e-05	2.50897e-05	2.75984e-05	2.25947e-05
P16086	7.45019e-05	6.15403e-05	6.07233e-05	6.58419e-05	6.6164e-05	4.5947e-05	6.95667e-05	5.81587e-05	5.28064e-05	7.11644e-05	5.95477e-05	5.35941e-05
P00507	0.00011501	0.000134236	0.000122101	0.000113565	0.000129665	8.87378e-05	6.39273e-05	0.000113745	0.000111527	0.000128646	0.000108147	7.82194e-05
Q6PEC4	6.77768e-06	9.73152e-06	1.02134e-05	1.14307e-05	1.20631e-05	7.94229e-06	1.30012e-05	1.08787e-05	9.94763e-06	1.34001e-05	1.21292e-05	6.02739e-06
P62963	5.28099e-05	6.05326e-05	4.22813e-05	5.7495e-05	5.05233e-05	1.69392e-05	5.81041e-05	4.91573e-05	3.43992e-05	3.40408e-05	5.02152e-05	1.12997e-05
Q9Z1P2	1.47053e-05	1.46767e-05	2.00408e-05	1.47093e-05	1.42074e-05	1.2374e-05	1.50628e-05	1.60705e-05	1.87212e-05	1.64409e-05	1.57349e-05	1.39688e-05
P63100	3.89867e-05	4.79042e-05	5.21203e-05	3.66094e-05	3.02459e-05	4.23032e-05	4.42559e-05	3.81594e-05	4.61556e-05	5.64928e-05	3.89829e-05	4.13721e-05
P68255	0.000235259	0.000305821	0.000325451	0.000267562	0.000245118	0.000178967	0.000306035	0.000184841	0.00029453	0.000343504	0.000198232	0.000169029
Q62669	2.42704e-05	9.89601e-05	3.72424e-05	0.0001224	8.92517e-05	6.43767e-05	0.000123854	0.000110105	0.000226879	0.000310736	9.18486e-05	8.65349e-06
F1LP82	2.35814e-05	2.67123e-05	2.42496e-05	2.34993e-05	2.47529e-05	1.37101e-05	2.4943e-05	2.73055e-05	2.2537e-05	2.01029e-05	3.0746e-05	1.92742e-05
P63319	2.60687e-05	2.80823e-05	2.64148e-05	3.04142e-05	2.92937e-05	2.04385e-05	2.71539e-05	2.95992e-05	2.27681e-05	2.7924e-05	2.97768e-05	2.31018e-05
P60881	5.50902e-05	6.6092e-05	5.03514e-05	6.03384e-05	5.56664e-05	4.18436e-05	6.37982e-05	4.84567e-05	5.41119e-05	5.92238e-05	8.0707e-05	4.47071e-05
D3ZEN5	3.81356e-05	3.70556e-05	3.44523e-05	5.41208e-05	4.31033e-05	5.52397e-06	5.21081e-05	4.1283e-05	4.6664e-05	5.76262e-05	4.73309e-05	3.23203e-05
P47819	0.000127837	0.000108513	0.000115569	0.000116957	0.000104347	8.53318e-05	0.000132933	9.65586e-05	0.000120253	0.00013941	0.000136006	8.82832e-05
P50399	6.76927e-05	6.88573e-05	7.14391e-05	7.02371e-05	7.24209e-05	5.57565e-05	0.000190583	5.50593e-05	6.58481e-05	0.000178007	7.06506e-05	5.18785e-05
P21575	7.80086e-05	0.000104844	9.28578e-05	0.000104585	0.000104776	6.38354e-05	9.99227e-05	6.97394e-05	0.000101587	7.5505e-05	0.000102695	5.78713e-05
P35704	5.25476e-05	5.52844e-05	4.81616e-05	5.52281e-05	5.51668e-05	3.76412e-05	4.92617e-05	4.63441e-05	5.136e-05	5.61281e-05	5.14322e-05	3.56651e-05
F1M779	7.56869e-05	7.32801e-05	8.64296e-05	7.28422e-05	8.48047e-05	7.14692e-05	8.25578e-05	7.69553e-05	8.1467e-05	9.02205e-05	7.54946e-05	7.15658e-05
P62749	4.11553e-05	5.80036e-05	3.01639e-05	4.39894e-05	3.88267e-05	7.72169e-06	4.48302e-05	3.9354e-05	3.67295e-05	4.28801e-05	4.20545e-05	1.78043e-05
G3V9G3	0.000405387	0.000500269	0.000433446	0.000464963	0.000399094	9.47276e-05	0.000451328	0.000289751	0.000359269	0.000436434	0.000474922	0.000151918
P59215	0.000122358	0.000149136	0.00013931	0.000150019	0.000147579	8.83884e-05	0.000146517	0.000118786	0.000159398	0.000157623	0.000173766	8.55043e-05
P84083	4.16717e-05	4.732e-05	2.43239e-05	1.9353e-05	4.4095e-05	2.21387e-05	4.75336e-05	3.78817e-05	2.48932e-05	4.76818e-05	4.13797e-05	1.63954e-05
Q63537	0.000118018	0.000164429	0.000114826	0.000140349	0.000154837	7.11761e-05	0.000149159	0.000125107	0.000118281	0.000148869	0.000167081	7.81987e-05
P39069	2.66124e-05	3.00878e-05	2.74071e-05	1.5679e-05	1.5809e-05	1.76135e-05	2.43987e-05	2.00136e-05	3.5592e-05	1.84864e-05	1.79474e-05	1.01111e-05
P21575-4	7.80086e-05	0.000104844	9.28578e-05	0.000104585	0.000104776	6.38354e-05	9.99227e-05	6.97394e-05	0.000101587	7.5505e-05	0.000102695	5.78713e-05
P11442	7.56869e-05	7.32801e-05	8.64296e-05	7.28422e-05	8.48047e-05	7.14692e-05	8.25578e-05	7.69553e-05	8.1467e-05	9.02205e-05	7.54946e-05	7.15658e-05
Q8VBU2-2	2.69706e-05	3.24364e-05	3.64428e-05	3.59123e-05	4.24627e-05	1.70035e-05	2.60852e-05	3.57555e-05	2.78218e-05	3.94107e-05	3.94568e-05	1.42133e-05
P13221	8.30206e-05	8.58805e-05	7.63241e-05	7.96661e-05	8.64296e-05	4.3802e-05	8.24599e-05	7.69136e-05	8.45132e-05	9.0305e-05	7.4713e-05	5.04938e-05
Q9Z339	6.71455e-05	1.07766e-05	1.04821e-05	9.0113e-06	6.39143e-05	5.59385e-06	1.23604e-05	8.00456e-05	1.01977e-05	6.80037e-05	1.51127e-05	4.7914e-06
P21575-2	7.80086e-05	0.000104844	9.28578e-05	0.000104585	0.000104776	6.38354e-05	9.99227e-05	6.97394e-05	0.000101587	7.5505e-05	0.000102695	5.78713e-05
Q9ER34	9.92026e-05	0.000114126	0.000110907	9.74618e-05	0.000110348	6.96825e-05	0.000105004	0.000110272	9.90914e-05	0.000104007	0.000117602	5.21784e-05
D4A4D5	1.34333e-05	1.88009e-05	1.48621e-05	1.62552e-05	9.72355e-06	7.54918e-06	1.75107e-05	8.63418e-06	1.05353e-05	1.86513e-05	1.61381e-05	9.50127e-06
P21575-8	7.80086e-05	0.000104844	9.28578e-05	0.000104585	0.000104776	6.38354e-05	9.99227e-05	6.97394e-05	0.000101587	7.5505e-05	0.000102695	5.78713e-05
Q6P7Q4	1.27618e-05	2.54799e-05	1.9573e-05	1.47359e-05	2.08003e-05	8.06428e-06	1.74948e-05	1.93325e-05	1.16482e-05	1.84541e-05	1.99219e-05	9.61125e-06
P80254	1.95508e-05	3.56846e-05	2.4388e-05	1.0378e-05	1.31846e-05	8.71777e-06	8.38135e-06	2.51047e-05	1.75403e-05	1.8654e-05	1.67454e-05	9.90493e-06
Q8VBU2	2.63698e-05	2.8968e-05	3.34705e-05	3.44727e-05	3.97595e-05	1.70035e-05	2.27741e-05	3.22939e-05	2.39148e-05	3.94107e-05	3.92094e-05	1.42133e-05
B0BNA5	2.23622e-05	2.7252e-05	1.97368e-05	2.47115e-05	2.15159e-05	1.21898e-05	2.71697e-05	1.89128e-05	1.89982e-05	2.53634e-05	2.3331e-05	1.70996e-05
F1MAQ5	5.74342e-05	7.03585e-05	6.18929e-05	6.273e-05	6.86042e-05	3.9671e-05	6.97458e-05	5.78114e-05	4.30826e-05	6.85915e-05	6.74824e-05	4.26766e-05
F1LX07	2.33448e-05	2.45322e-05	3.13893e-05	3.13685e-05	3.31309e-05	1.60764e-05	2.72746e-05	3.32656e-05	2.8965e-05	2.8904e-05	2.71215e-05	1.98371e-05
P68136	0.000911315	0.00128914	0.0013474	0.00122197	0.00119151	0.000746757	0.00114881	0.000910846	0.00110008	0.00131084	0.00131236	0.00065988
D3ZD09	6.23055e-05	6.76996e-05	6.15488e-05	5.71296e-05	6.96408e-05	4.94402e-05	6.16449e-05	6.1842e-05	5.96836e-05	7.01656e-05	6.77255e-05	4.43699e-05
P36201	7.78973e-06	6.48332e-06	6.59856e-06	7.26459e-06	9.11977e-06	4.87805e-06	7.92224e-06	9.02966e-06	6.55566e-06	9.19952e-06	8.86559e-06	3.66916e-06
P62076	7.75648e-06	9.27566e-06	9.86e-06	7.55498e-06	8.61581e-06	4.8641e-06	8.4067e-06	6.84402e-06	1.07877e-05	8.747e-06	9.56645e-06	4.96347e-06
P18889	2.89994e-10	1.34381e-10	1.58605e-10	1.81836e-10	8.56902e-11	2.52923e-10	2.1199e-10	2.11647e-10	9.94952e-11	1.64049e-10	2.95827e-10	2.04743e-10
Q62951	1.83309e-05	1.39064e-05	1.48764e-05	1.62573e-05	1.77605e-05	1.05918e-05	1.73887e-05	1.47642e-05	1.62311e-05	1.61356e-05	1.76399e-05	9.37469e-06
F1LNK0	5.74342e-05	7.03585e-05	6.18929e-05	6.273e-05	6.86042e-05	3.9671e-05	6.97458e-05	5.78114e-05	4.30826e-05	6.85915e-05	6.74824e-05	4.26766e-05
O88600	2.61436e-05	2.92385e-05	1.91494e-05	2.82226e-05	2.63818e-05	1.4305e-05	3.006e-05	2.4483e-05	2.02107e-05	1.9495e-05	2.69767e-05	1.82714e-05
P37361	3.11e-05	3.52464e-05	2.83505e-05	3.22424e-05	2.83038e-05	2.34323e-05	9.84348e-06	1.78494e-05	2.76473e-05	4.78339e-05	3.57428e-05	2.98489e-05
P55053	1.85537e-05	2.16881e-05	2.10997e-05	1.81051e-05	2.08e-05	1.74972e-05	2.18049e-05	1.69484e-05	1.83824e-05	1.77473e-05	1.75413e-05	1.53971e-05
P26772	4.57803e-05	6.31551e-05	5.46668e-05	4.69822e-05	3.76124e-05	3.06814e-05	5.61709e-05	4.75715e-05	4.96808e-05	5.9635e-05	5.9364e-05	1.92462e-05
Q9QUL6	7.65389e-05	8.89781e-05	9.11917e-05	8.68557e-05	9.12987e-05	6.57763e-05	9.12192e-05	7.50613e-05	8.47071e-05	9.14467e-05	9.18769e-05	6.14271e-05
D4ACB8	1.40976e-05	1.70935e-05	1.8354e-05	1.62297e-05	1.73938e-05	1.35093e-05	1.62404e-05	1.55327e-05	1.53807e-05	1.67788e-05	1.79572e-05	1.05946e-05
F1LXA0	1.12912e-05	1.40341e-05	8.29952e-06	1.28011e-05	1.34393e-05	8.34093e-06	1.26636e-05	1.36241e-05	1.10403e-05	1.39768e-05	1.46524e-05	5.86829e-06
M0R660	0.000391531	0.000880168	0.000852441	0.00083116	0.000910724	0.000263839	0.000907977	0.000712933	0.000860079	0.000952589	0.000962047	0.000302347
R9PY00	0.000116485	0.00012391	0.000110921	0.000110958	0.000113509	3.01885e-05	0.000104508	4.97017e-05	7.58175e-05	0.000130719	0.00011145	1.86099e-05
P20788	3.39962e-05	3.39255e-05	3.65663e-05	3.09204e-05	3.21021e-05	3.05666e-05	3.39181e-05	2.89684e-05	3.00296e-05	3.36044e-05	3.06154e-05	2.77874e-05
Q5XIH3	1.82443e-05	1.76428e-05	2.1089e-05	1.80251e-05	1.90762e-05	1.2064e-05	1.85679e-05	1.71854e-05	1.66742e-05	1.92796e-05	1.95452e-05	1.31808e-05
Q6P6V0	7.53151e-05	8.03754e-05	6.52371e-05	7.69515e-05	7.98602e-05	5.0586e-05	7.93973e-05	6.63307e-05	7.63434e-05	7.90327e-05	7.02065e-05	5.17635e-05
Q62952	5.43419e-05	0.000121715	7.43439e-05	0.000121596	0.000118867	9.46211e-05	0.000119909	5.15439e-05	0.000107939	0.000129792	0.000129002	8.51801e-05
G3V6S0	3.91513e-05	3.92884e-05	4.23952e-05	3.96883e-05	4.31211e-05	3.3219e-05	3.9521e-05	3.29893e-05	4.03963e-05	4.25097e-05	4.33745e-05	3.32685e-05
P61751	4.16717e-05	2.89919e-05	2.25302e-05	1.80126e-05	4.4095e-05	1.92858e-05	4.75336e-05	3.78817e-05	2.40666e-05	3.27687e-05	4.13797e-05	1.45574e-05
P35332	7.4974e-06	9.55536e-06	1.14568e-05	7.1538e-06	7.6785e-06	1.19854e-05	1.24592e-05	6.75809e-06	1.51002e-05	7.4067e-06	9.88714e-06	4.95041e-06
Q9WVA1	1.88605e-06	2.60322e-06	2.87388e-06	5.63908e-06	2.82917e-06	3.54182e-06	2.30583e-06	2.343e-06	4.20655e-06	4.31718e-06	3.11944e-06	2.22943e-06
Q04940	4.0597e-05	5.2753e-05	3.76523e-05	4.192e-05	4.9808e-05	0.000100942	5.33389e-05	3.46263e-05	2.4688e-05	6.08436e-05	4.80869e-05	3.65275e-05
D4A0E2	1.58334e-05	1.50412e-05	1.27046e-05	1.56894e-05	1.48841e-05	1.13697e-05	1.65021e-05	1.2395e-05	1.3979e-05	1.64931e-05	1.56816e-05	7.82427e-06
G3V7L8	4.64987e-05	4.93877e-05	4.91517e-05	4.62424e-05	4.9383e-05	2.80957e-05	4.85698e-05	4.19704e-05	4.63922e-05	4.91346e-05	4.92008e-05	3.39181e-05
D3ZW55	8.00203e-06	8.89949e-06	7.68783e-06	8.39462e-06	7.59709e-06	2.9605e-06	7.99281e-06	5.51245e-06	7.48386e-06	5.52748e-06	7.49149e-06	6.06312e-06
P18420	4.04027e-06	6.75862e-06	6.20985e-06	4.64429e-06	7.56343e-06	5.57962e-06	7.56593e-06	5.40558e-06	3.39175e-06	6.739e-06	6.27568e-06	3.73549e-06
P43425	4.33862e-06	3.70164e-06	5.24771e-06	3.23664e-06	2.9562e-06	2.12575e-10	5.66832e-06	5.88054e-06	5.89431e-06	5.84538e-06	7.34797e-06	6.00602e-06
P29419	3.04535e-05	3.25743e-05	3.0107e-05	2.30463e-05	3.21589e-05	2.38568e-05	3.00118e-05	3.28863e-05	2.88779e-05	2.63533e-05	3.04947e-05	1.26061e-05
B5DFD8	2.85265e-06	4.36845e-06	3.08727e-06	3.39551e-06	3.59747e-06	3.57401e-06	3.9372e-06	2.24445e-06	2.36882e-06	3.13063e-06	2.13463e-06	3.58888e-06
Q920L2	2.04989e-05	2.13115e-05	2.63022e-05	2.04735e-05	2.09558e-05	1.86554e-05	2.07609e-05	2.18988e-05	2.108e-05	2.23728e-05	2.03397e-05	1.88171e-05
P19527	5.02938e-05	7.02429e-05	7.64489e-05	6.86441e-05	5.50872e-05	6.81891e-05	8.26523e-05	3.72934e-05	9.81655e-05	8.43133e-05	3.97914e-05	4.94301e-05
G3V8C3	1.13311e-05	1.67287e-05	4.44769e-05	9.99586e-06	1.91034e-05	5.29941e-05	6.22697e-05	1.49172e-05	5.76321e-05	6.15293e-05	1.41908e-05	1.29876e-05
P63004	6.8379e-06	1.30919e-05	1.28716e-05	8.16279e-06	1.21991e-05	8.90893e-06	1.0504e-05	8.04129e-06	9.15948e-06	1.17817e-05	1.10514e-05	7.86301e-06
B2RZ72	1.79722e-05	1.11408e-05	1.98066e-05	2.00665e-05	1.83728e-05	8.60376e-06	2.1747e-05	1.75999e-05	2.12936e-05	2.07736e-05	1.96974e-05	5.07284e-06
P23565	5.54035e-05	5.94041e-05	7.85945e-05	7.18164e-05	5.22671e-05	7.32092e-05	8.83799e-05	4.33274e-05	9.00184e-05	9.02218e-05	5.09617e-05	6.06765e-05
Q05962	0.000283263	0.000257886	0.000295938	0.000222294	0.000256789	0.000234969	0.000262327	0.000286302	0.000283533	0.000276272	0.000237656	0.000142106
P62982	2.58758e-05	3.46405e-05	3.16232e-05	3.34239e-05	3.04e-05	1.68537e-05	2.91887e-05	3.02286e-05	2.66249e-05	3.78879e-05	3.26668e-05	1.89395e-05
Q06647	5.62042e-05	7.52558e-05	5.64817e-05	7.55805e-05	8.3283e-05	5.74724e-05	8.19481e-05	7.43907e-05	6.55527e-05	7.95069e-05	7.54932e-05	5.44587e-05
P04906	1.61445e-05	2.27479e-05	2.93713e-05	2.26947e-05	2.01339e-05	1.25843e-05	2.15096e-05	1.8126e-05	2.36146e-05	2.14968e-05	1.50819e-05	3.96357e-06
F1LRT5	1.77937e-06	2.12866e-06	1.37489e-06	2.2732e-06	1.85028e-06	1.78039e-07	3.32835e-06	2.18551e-06	2.09279e-06	2.7509e-06	2.2051e-06	6.17403e-07
P62762	3.20231e-05	3.42823e-05	3.04531e-05	2.99098e-05	2.73299e-05	2.52384e-05	2.94657e-05	2.50995e-05	3.58477e-05	3.97841e-05	3.12785e-05	1.97793e-05
Q5FVI6	1.54997e-05	1.66902e-05	1.50012e-05	1.59915e-05	1.62998e-05	1.47253e-05	1.41138e-05	1.3873e-05	1.38439e-05	1.84997e-05	1.03434e-05	1.14582e-05
A0A096MJM1	5.05055e-06	5.06214e-06	3.4123e-06	7.99911e-06	5.1082e-06	9.72068e-06	5.8869e-06	3.70302e-06	5.94146e-06	6.15806e-06	5.42111e-06	2.42316e-06
P01041	6.83359e-06	7.79407e-06	6.95407e-06	4.91058e-06	7.50587e-06	3.08842e-06	5.98049e-06	4.68595e-06	4.40148e-06	7.53375e-06	5.48173e-06	1.38684e-06
P61206	7.34007e-05	8.07262e-05	7.77424e-05	6.19799e-05	7.36494e-05	7.64775e-05	8.7732e-05	7.33258e-05	6.70515e-05	7.98175e-05	6.8099e-05	4.24766e-05
B0BMW2	4.03143e-06	5.90935e-06	7.38082e-06	4.26682e-06	6.05928e-06	5.28374e-06	6.15065e-06	2.89812e-06	7.39036e-06	4.71105e-06	5.12292e-06	5.64807e-06
Q3T1J1	1.51635e-05	2.28841e-05	2.10306e-05	1.68774e-05	1.81816e-05	1.29855e-05	1.34353e-05	1.30989e-05	2.08445e-05	1.7849e-05	2.02484e-05	1.72897e-05
P54311	0.000105206	0.00010712	0.000103846	0.000104824	0.000104028	0.000106974	0.000127931	8.41374e-05	0.000121044	0.000138832	0.000118492	9.65007e-05
Q66HF1	3.29379e-05	3.18201e-05	3.26858e-05	3.30048e-05	3.4282e-05	2.28705e-05	3.3646e-05	3.18574e-05	3.09378e-05	3.3649e-05	2.95959e-05	2.54019e-05
Q4V7C7	3.52017e-05	3.61382e-05	3.56271e-05	2.7924e-05	3.50083e-05	3.11789e-05	2.78173e-05	3.05569e-05	2.73685e-05	2.57525e-05	2.77725e-05	1.96718e-05
P60841-2	4.16579e-06	8.95939e-06	6.11038e-06	7.66809e-06	8.74433e-06	6.94222e-06	9.24655e-06	5.71695e-06	9.61693e-06	9.55292e-06	9.56597e-06	4.52995e-06
Q5XIM9	1.63829e-05	1.31618e-05	1.59373e-05	1.59376e-05	1.56777e-05	1.20891e-05	1.6363e-05	1.37457e-05	1.19868e-05	1.76701e-05	1.42543e-05	7.55371e-06
P62161	0.000251115	0.000336092	0.000289707	0.000310451	0.000308332	0.000160519	0.000317281	0.000224717	0.000270846	0.000338709	0.000339476	0.000132699
P11598	2.28905e-05	2.48662e-05	1.64469e-05	1.91434e-05	1.6459e-05	1.9707e-05	2.04215e-05	2.01856e-05	1.45093e-05	1.75529e-05	2.10029e-05	1.97791e-05
Q3T1K5	3.13978e-05	3.61984e-05	3.21792e-05	3.11373e-05	2.65401e-05	1.8759e-05	3.16076e-05	2.47933e-05	2.73628e-05	2.80581e-05	2.9943e-05	1.83748e-05
Q5XI73	4.89503e-05	5.24668e-05	5.28748e-05	5.33435e-05	5.46626e-05	4.18158e-05	5.32749e-05	4.94882e-05	5.22314e-05	5.68667e-05	5.56586e-05	2.13202e-05
P27605	9.92382e-06	1.0268e-05	1.04938e-05	1.00608e-05	9.32983e-06	6.70066e-06	1.03498e-05	8.28299e-06	1.04236e-05	1.05065e-05	9.81408e-06	6.51306e-06
Q6AYK6	2.03843e-05	3.85582e-06	1.01292e-05	9.81206e-06	5.42125e-06	2.1929e-05	4.22088e-06	1.8443e-05	8.84443e-06	4.71047e-06	4.15248e-06	3.91668e-05
Q7M0E3	1.23092e-05	1.03493e-05	1.238e-05	9.051e-06	8.85472e-06	1.7618e-05	7.35631e-06	7.5657e-06	1.30966e-05	1.12096e-05	1.0927e-05	9.44315e-06
Q8R491	6.03565e-06	7.39043e-06	7.38179e-06	6.80167e-06	3.98146e-06	4.17126e-06	5.7917e-06	4.95599e-06	7.06572e-06	7.4559e-06	4.13383e-06	4.6073e-06
P83941	7.37453e-06	6.37793e-06	7.12752e-06	7.36872e-06	5.78032e-06	5.55983e-06	6.43212e-06	5.04549e-06	4.39871e-06	7.30957e-06	7.13032e-06	6.65296e-06
Q9WV97	9.74248e-06	9.39461e-06	5.02923e-06	8.251e-06	7.55806e-06	8.44878e-06	6.97818e-06	7.64749e-06	8.82908e-06	9.04533e-06	7.54549e-06	6.27755e-06
D4ACG7	2.43357e-05	2.53816e-05	2.59285e-05	2.39472e-05	1.80001e-05	1.74886e-05	2.73668e-05	1.65037e-05	2.05131e-05	2.0622e-05	2.36247e-05	2.03281e-05
B0BMW0	2.04118e-05	6.43777e-05	6.24135e-05	5.54712e-05	2.17915e-05	1.29185e-05	5.70099e-05	5.12215e-05	5.44115e-05	5.60223e-05	6.14132e-05	3.92167e-05
D3ZVA6	4.30659e-06	4.88673e-06	3.39358e-06	4.0117e-06	3.5018e-06	5.78851e-07	4.89353e-06	3.35558e-06	2.7859e-06	3.93606e-06	3.06682e-06	2.24892e-06
P02600	1.17216e-10	7.43534e-07	1.35288e-10	1.19521e-10	2.76001e-10	2.44217e-10	2.58633e-10	1.04027e-05	2.13147e-11	1.61627e-10	3.87855e-12	1.83045e-10
F1M7Y3	1.23406e-05	1.31398e-05	1.53816e-05	1.28461e-05	1.25196e-05	1.14734e-05	9.8202e-06	1.27036e-05	1.41195e-05	1.45081e-05	1.40992e-05	9.41793e-06
P02688-3	0.000437424	0.000868053	0.000949829	0.00100386	0.000688342	0.000379439	0.000786257	0.000549663	0.00104414	0.000845654	0.00061903	0.000375551
D4A5G8	2.80775e-05	5.58634e-05	5.18265e-05	4.98768e-05	4.37252e-05	3.88186e-05	5.2368e-05	4.23228e-05	4.6979e-05	3.62219e-05	5.03384e-05	2.64198e-05
D4A830	1.90033e-06	1.93321e-06	1.33269e-06	1.82162e-06	2.36783e-06	1.65489e-06	1.49427e-06	1.14984e-06	1.97853e-06	2.24562e-06	1.81405e-06	1.0226e-06
F7EPH4	8.9467e-06	9.82129e-06	9.52411e-06	9.22216e-06	1.00198e-05	7.37732e-06	1.02496e-05	9.55109e-06	9.12388e-06	1.04143e-05	9.56025e-06	5.27092e-06
P10860	5.59619e-05	5.59572e-05	5.95871e-05	5.22454e-05	5.47607e-05	3.58592e-05	5.48048e-05	5.39435e-05	5.85452e-05	5.51501e-05	6.75359e-05	3.46995e-05
D3ZE15	1.52787e-05	1.59356e-05	2.24639e-05	1.98576e-05	8.78222e-06	1.09744e-05	1.52632e-05	2.16051e-06	1.25019e-05	1.80172e-05	1.68536e-05	4.50629e-06
P04897	6.42716e-05	8.52038e-05	7.68962e-05	7.89707e-05	7.96605e-05	1.71085e-05	7.88815e-05	2.53571e-05	8.37e-05	8.43501e-05	9.22838e-05	1.17036e-05
Q566C7	4.90722e-06	7.05774e-06	2.15931e-06	5.62348e-06	3.21304e-06	3.64632e-06	5.95098e-06	4.16219e-06	3.50095e-06	5.32769e-06	6.45534e-06	2.24657e-06
P47875	1.81455e-05	1.4188e-05	1.69648e-05	2.28224e-05	1.71922e-05	1.04104e-05	1.40057e-05	8.55935e-06	1.78485e-05	2.02116e-05	1.27848e-05	1.11092e-05
B2RYW3	9.07249e-06	1.19071e-05	1.12513e-05	1.21265e-05	1.2583e-05	8.35574e-06	1.14726e-05	1.19827e-05	9.4779e-06	1.05749e-05	1.26059e-05	6.19064e-06
B0BNL2	3.93037e-06	6.87351e-06	8.1121e-06	4.62866e-06	6.11658e-06	3.0698e-06	6.43759e-06	3.22146e-06	8.31817e-06	4.45325e-06	2.47096e-06	4.39061e-06
D4AC23	1.19409e-05	1.23059e-05	1.2614e-05	1.09143e-05	1.26807e-05	7.53546e-06	1.42666e-05	9.61071e-06	1.33983e-05	1.37586e-05	1.07443e-05	7.99402e-06
P63170	3.19343e-05	3.97286e-05	5.13341e-05	3.43715e-05	3.57694e-05	4.31109e-05	3.35156e-05	3.69706e-05	4.65602e-05	3.77328e-05	4.54368e-05	5.44784e-05
Q78P75	3.47242e-05	4.15188e-05	5.20545e-05	3.52819e-05	3.77396e-05	3.84658e-05	3.58804e-05	3.8904e-05	4.70315e-05	4.08813e-05	4.88023e-05	3.61919e-05
P62994-2	7.38189e-06	6.58614e-06	6.80286e-06	7.14227e-06	6.85181e-06	4.71613e-06	7.5252e-06	7.09739e-06	7.02412e-06	8.47042e-06	6.20366e-06	5.75504e-06
D3ZUP5	8.93604e-06	1.06731e-05	9.5855e-06	9.76134e-06	8.22999e-06	8.07414e-06	1.29325e-05	8.77479e-06	1.00469e-05	1.19057e-05	9.91219e-06	1.37124e-05
P51635	1.2035e-05	1.30864e-05	1.47829e-05	1.3268e-05	1.26418e-05	7.51768e-06	1.25403e-05	1.01012e-05	1.08712e-05	1.31012e-05	1.14262e-05	7.03875e-06
M0RDC5	2.87895e-05	5.52039e-05	5.50168e-05	5.2219e-05	4.99318e-05	3.63553e-05	5.58442e-05	4.81637e-05	5.06433e-05	5.15128e-05	5.53809e-05	4.26504e-05
Q8CFN2-2	2.01284e-05	1.73546e-05	1.63804e-05	1.88741e-05	1.57241e-05	2.1265e-05	1.89909e-05	1.74714e-05	1.78067e-05	1.88824e-05	2.35075e-05	1.8833e-05
G3V6H5	2.58499e-05	2.41526e-05	3.35278e-05	1.93218e-05	3.19389e-05	2.20575e-05	3.13161e-05	2.99614e-05	3.50093e-05	2.92095e-05	2.00615e-05	1.87418e-05
Q9Z214	5.63497e-06	6.21642e-06	6.16334e-06	5.06744e-06	6.87035e-06	5.9982e-06	5.69068e-06	6.0103e-06	8.12191e-06	6.67535e-06	6.49848e-06	3.55482e-06
P60881-2	4.55184e-05	5.8374e-05	4.99301e-05	5.0709e-05	4.56562e-05	4.18436e-05	5.58853e-05	4.66079e-05	4.76501e-05	5.76116e-05	7.23532e-05	4.29896e-05
O35303-5	1.18503e-05	1.25037e-05	1.40974e-05	1.26488e-05	1.34891e-05	1.20832e-05	1.3096e-05	1.19723e-05	1.41886e-05	1.31749e-05	1.33324e-05	8.76369e-06
P82995	0.000100099	0.000130018	0.000120663	0.00011811	0.000135061	8.76294e-05	0.000148511	0.000102785	0.000129024	0.000162771	0.00015295	9.1615e-05
P56571	1.65293e-05	2.26815e-05	2.48695e-05	1.83097e-05	2.50564e-05	4.41571e-06	2.00274e-05	1.81319e-05	2.52917e-05	2.09419e-05	2.68584e-05	1.69486e-05
P68511	0.000235259	0.000305821	0.000325451	0.000267562	0.00025597	0.000205011	0.000306035	0.000184841	0.00029453	0.000343504	0.000182933	0.000161459
F1MA36	3.23753e-05	3.23126e-05	3.12285e-05	3.07235e-05	3.24097e-05	2.49495e-05	2.96613e-05	2.73824e-05	3.42787e-05	3.07386e-05	3.24512e-05	2.78704e-05
P62944	3.78825e-05	3.52676e-05	3.55951e-05	3.7483e-05	3.87929e-05	2.99033e-05	3.81718e-05	2.89305e-05	2.80611e-05	4.09365e-05	4.43531e-05	2.97971e-05
P06687	0.000373104	0.000397521	0.000373881	0.000391342	0.000394029	0.000216239	0.00039378	0.000429366	0.000418335	0.000433468	0.000502565	0.000242232
P63012	7.98028e-05	0.000136064	0.000120125	0.000112455	8.72275e-05	4.6605e-05	0.000114193	0.000105273	0.000115482	0.000116937	0.000154811	7.09516e-05
P35213-2	0.000235259	0.000305821	0.000325451	0.000267562	0.000245118	0.00018809	0.000306035	0.000184841	0.00029453	0.000343504	0.000202492	0.000169029
P62632	0.000110886	0.000136284	0.000127781	9.01221e-05	0.000132507	4.64116e-05	0.000149448	0.000108004	0.000120533	0.00014556	0.000133163	7.85795e-05
P62630	0.00013035	0.00015407	0.000139381	0.000107103	0.000146218	6.30776e-05	0.000160325	0.000130733	0.000142539	0.000151471	0.000141584	9.70597e-05
A0A096MKF7	2.43359e-10	7.32519e-11	1.09583e-10	1.56527e-10	6.19337e-07	1.46857e-10	2.85163e-10	3.11745e-10	4.25719e-11	3.26955e-10	3.63407e-07	8.52021e-07
D3ZZR9	2.37081e-06	3.75811e-06	3.48315e-06	1.9213e-06	3.23064e-06	1.71731e-06	2.06542e-06	3.57877e-06	2.78931e-06	2.44358e-06	2.62385e-06	8.31485e-11
G3V8Q2	5.54035e-05	5.94041e-05	7.85945e-05	7.18164e-05	5.22671e-05	7.32092e-05	8.83799e-05	4.35267e-05	9.00184e-05	9.02218e-05	5.09617e-05	6.06765e-05
Q8CFN2	2.01284e-05	1.73546e-05	1.63804e-05	1.88741e-05	1.57241e-05	2.1265e-05	1.89909e-05	1.74714e-05	1.78067e-05	1.88824e-05	2.35075e-05	1.8833e-05
P85834	2.12683e-05	2.2508e-05	2.04655e-05	1.97198e-05	2.07133e-05	1.64926e-05	2.07049e-05	1.90677e-05	1.81731e-05	2.12034e-05	2.14128e-05	1.70858e-05
F1LPG5	1.70986e-05	1.56537e-05	1.70865e-05	1.5573e-05	1.67518e-05	1.38194e-05	1.55976e-05	1.8799e-05	1.63968e-05	1.65286e-05	1.59421e-05	2.66193e-06
B2RYJ7	1.20861e-05	1.62711e-05	1.59981e-05	1.42498e-05	1.59709e-05	8.16213e-06	1.6073e-05	1.27371e-05	9.89309e-06	1.55231e-05	1.72796e-05	7.65748e-06
P61589	1.82945e-05	1.92828e-05	1.83413e-05	1.9915e-05	1.45909e-05	1.45678e-05	1.99835e-05	1.40203e-05	1.94265e-05	1.87522e-05	2.0323e-05	1.21554e-05
E9PT48	4.03048e-05	3.10164e-05	4.2011e-05	4.47799e-05	4.60879e-05	3.21569e-05	4.87107e-05	3.2649e-05	3.83644e-05	5.25402e-05	5.74224e-05	1.36158e-05
P02688	0.000437424	0.000868053	0.000949829	0.00100386	0.000688342	0.000434166	0.000786257	0.000549663	0.00104414	0.000845654	0.00061903	0.000412483
D3ZYX8	1.17714e-05	9.25828e-06	7.91975e-06	7.85584e-06	9.90722e-06	5.43163e-06	7.98412e-06	1.03853e-05	8.94827e-06	8.6079e-06	1.20834e-05	7.31636e-06
F7FKI5	2.80775e-05	5.58634e-05	5.18265e-05	4.98768e-05	4.37252e-05	3.88186e-05	5.2368e-05	4.23228e-05	4.6979e-05	3.62219e-05	5.03384e-05	2.64198e-05
M0R5B4	0.00077939	0.00101536	0.00104887	0.00102161	0.00100151	0.000605872	0.00101202	0.000883726	0.00108108	0.000982579	0.000982631	0.000504792
Q9QXQ0	1.47053e-05	1.46767e-05	2.00408e-05	1.47093e-05	1.42074e-05	1.2374e-05	1.50628e-05	1.60705e-05	1.87212e-05	1.64409e-05	1.57349e-05	1.39688e-05
A1L108	7.1198e-06	1.03818e-05	4.20342e-06	6.97706e-06	1.1571e-05	1.07319e-06	1.1207e-05	9.75684e-06	7.1252e-06	1.05775e-05	1.06991e-05	5.66903e-06
D3ZCZ9	1.42635e-05	1.71443e-05	1.60552e-05	1.33531e-05	1.59244e-05	1.53663e-05	1.58041e-05	1.51452e-05	1.53593e-05	1.82488e-05	1.76222e-05	1.55575e-05
P34058	0.000100099	0.000130018	0.000115974	0.00011811	0.000135061	8.76294e-05	0.000148511	9.81103e-05	0.000129024	0.000162771	0.00015295	9.1615e-05
G3V728	2.35639e-05	2.8695e-05	2.35289e-05	2.46706e-05	2.71514e-05	6.67449e-06	2.59351e-05	2.42782e-05	2.12307e-05	2.31871e-05	2.52803e-05	1.40982e-05
Q5M7U6	2.26981e-05	0.000113397	6.9298e-05	6.71888e-05	0.000105989	2.3087e-05	0.000103647	9.36624e-05	6.08568e-05	0.000112919	0.000117112	1.26741e-05
D4A5L9	4.56985e-05	4.55884e-05	5.33602e-05	4.57233e-05	4.18578e-05	2.89551e-05	5.31061e-05	3.09233e-05	4.77332e-05	6.32072e-05	3.60681e-05	3.7551e-05
Q3KRE3	1.74405e-06	2.42197e-06	4.27108e-06	1.68057e-06	3.30496e-06	3.81217e-11	2.41212e-06	2.35776e-06	1.2931e-06	2.45942e-06	2.32801e-10	4.71432e-07
P30904	5.91881e-05	6.58895e-05	5.97615e-05	8.94901e-05	5.94582e-05	1.49512e-05	6.32777e-05	7.32513e-05	8.51879e-05	9.19556e-05	7.43597e-05	1.96693e-05
P62747	1.16696e-05	1.95209e-05	1.57705e-05	1.76471e-05	1.88487e-05	1.30094e-05	1.34565e-05	1.62655e-05	1.81503e-05	1.6727e-05	2.32091e-05	1.17729e-05
P85515	1.20861e-05	9.94238e-05	5.79658e-05	5.67095e-05	9.74644e-05	9.2668e-06	9.3575e-05	8.71091e-05	5.67386e-05	0.000105869	0.000104746	7.76922e-06
A9UMV9	3.39157e-06	5.28178e-11	1.46322e-05	7.08164e-06	5.66335e-06	1.42201e-05	4.87512e-06	6.92715e-06	5.50141e-06	7.41853e-06	5.29493e-06	1.75961e-06
Q4KLF8	7.97879e-06	1.46168e-05	7.45645e-06	8.42902e-06	8.55579e-06	7.82306e-06	1.22262e-05	9.74357e-06	6.98447e-06	9.51955e-06	9.89996e-06	4.6894e-06
D4ABT0	0.000122358	0.000149136	0.00013931	0.000150019	0.000147579	8.83884e-05	0.000146517	0.000118786	0.000159398	0.000157623	0.000173766	8.55043e-05
P04636	0.000201549	0.000216526	0.000213276	0.000197441	0.000205421	0.000108757	0.000207949	0.00019964	0.000206526	0.000214329	0.000204711	0.000169905
F1LVX3	5.70032e-06	7.05233e-06	5.55338e-06	5.24813e-06	4.57379e-06	8.04106e-06	6.33415e-06	4.29236e-06	4.7129e-06	6.48691e-06	7.27904e-06	5.33576e-06
G3V6Y6	2.79899e-05	2.77315e-05	2.81541e-05	2.66289e-05	2.92503e-05	1.73094e-05	2.61083e-05	2.53573e-05	2.60438e-05	2.84648e-05	3.03819e-05	1.91673e-05
P46462	2.28998e-05	2.02094e-05	2.17148e-05	2.26564e-05	2.29188e-05	1.49786e-05	2.37004e-05	2.20327e-05	2.14635e-05	2.3287e-05	2.28454e-05	1.87978e-05
P20171	4.21996e-06	7.14433e-06	5.20248e-06	4.50728e-06	6.96147e-06	6.4266e-06	3.14932e-06	7.76531e-06	3.93518e-06	8.17366e-06	6.51244e-06	4.5978e-06
E9PSV5	1.18196e-05	1.81837e-05	1.45895e-05	1.62734e-05	1.58808e-05	8.72824e-06	1.51083e-05	1.22845e-05	1.7005e-05	1.74961e-05	1.52916e-05	1.14337e-05
Q63228	1.53421e-05	1.69493e-05	2.19223e-05	1.58647e-05	2.36474e-05	1.31723e-05	1.81574e-05	1.50734e-05	1.43732e-05	2.37613e-05	1.62181e-05	1.43954e-05
P10818	4.18454e-05	4.4431e-05	3.89577e-05	3.96508e-05	4.2692e-05	5.70858e-06	5.2237e-05	5.09537e-05	4.55614e-05	5.89561e-05	5.91003e-05	2.06146e-05
P62138	1.90223e-05	2.48862e-05	1.85764e-05	1.88835e-05	1.82045e-05	1.525e-05	2.07241e-05	1.71683e-05	1.33733e-05	2.08015e-05	1.79464e-05	1.84724e-05
Q08163	2.7612e-05	3.20629e-05	2.94061e-05	2.87024e-05	2.90734e-05	2.89696e-05	3.05458e-05	2.71042e-05	2.77082e-05	3.10568e-05	3.14628e-05	2.2553e-05
P19804	9.62851e-05	0.000105498	8.58173e-05	0.000102208	0.00010353	7.84121e-05	0.000106752	9.14581e-05	9.11392e-05	0.000106991	0.000115895	4.67853e-05
Q62658	6.04388e-05	9.95072e-05	8.64475e-05	9.51395e-05	9.46226e-05	5.50611e-05	8.94377e-05	7.47936e-05	9.39493e-05	8.43226e-05	9.24057e-05	6.72382e-05
Q99PD4	1.85624e-05	2.57768e-05	1.87103e-05	2.18375e-05	2.22587e-05	1.80494e-05	2.1611e-05	1.79165e-05	1.80243e-05	2.16113e-05	2.51417e-05	1.15357e-05
Q5RKI0	2.57401e-05	2.8923e-05	3.11484e-05	2.89539e-05	2.42587e-05	2.47678e-05	2.92588e-05	2.69187e-05	2.57127e-05	2.47222e-05	2.93725e-05	2.26596e-05
D4A1G4	2.5127e-10	5.55352e-06	6.59377e-07	1.23731e-06	5.44049e-06	8.37218e-07	5.44506e-06	2.81413e-06	7.35792e-07	5.15094e-06	4.53935e-06	8.60614e-07
F1LNF1	3.52096e-05	3.86707e-05	3.4142e-05	3.70243e-05	3.55389e-05	1.89792e-05	3.81935e-05	3.22885e-05	3.16695e-05	4.09297e-05	3.26706e-05	2.26931e-05
P70580	9.07185e-06	5.72568e-06	6.25637e-06	9.45174e-06	9.10293e-06	4.83173e-06	1.00772e-05	1.04451e-05	9.16248e-06	8.83825e-06	8.17301e-06	6.37169e-06
O35077	1.38124e-05	1.26888e-05	1.48743e-05	1.89563e-05	1.42787e-05	1.06089e-05	1.64515e-05	1.41936e-05	1.98648e-05	1.88877e-05	1.3476e-05	1.04822e-05
P49432	4.56914e-05	5.22557e-05	5.12668e-05	4.4667e-05	5.43451e-05	2.84099e-05	5.05998e-05	4.55014e-05	4.11903e-05	5.23147e-05	5.50797e-05	3.45741e-05
Q5U300	2.21293e-05	2.10506e-05	2.86327e-05	2.24188e-05	2.26068e-05	1.73251e-05	2.34592e-05	2.16506e-05	2.26834e-05	2.2354e-05	2.13636e-05	1.83429e-05
Q5M7A7	2.93755e-05	3.25681e-05	3.21382e-05	3.13645e-05	3.50787e-05	2.11473e-05	3.2135e-05	2.08311e-05	2.35042e-05	3.09976e-05	3.09904e-05	2.10841e-05
B2RYS2	2.26391e-05	1.8688e-05	2.12585e-05	2.3228e-05	2.32453e-05	1.65665e-05	2.4544e-05	2.01331e-05	2.10703e-05	2.47935e-05	1.87697e-05	1.74477e-05
P05708	5.17412e-05	5.09393e-05	5.75542e-05	4.71573e-05	5.27876e-05	4.79302e-05	4.44107e-05	5.5854e-05	4.32333e-05	4.54765e-05	5.1222e-05	4.17553e-05
P34926	3.71528e-05	3.69299e-05	4.21068e-05	4.15134e-05	4.15702e-05	2.47611e-05	4.57707e-05	3.40811e-05	3.38723e-05	4.75058e-05	3.99355e-05	2.92267e-05
P84092	3.51904e-05	3.03119e-05	3.25308e-05	3.3347e-05	2.57243e-05	1.67493e-05	3.13853e-05	2.94473e-05	2.85734e-05	3.62245e-05	3.46181e-05	2.59486e-05
Q5BJP3	2.45769e-10	2.44021e-06	5.69355e-06	2.92339e-11	8.73091e-06	4.85521e-06	1.85475e-10	8.91757e-06	8.8427e-06	2.74132e-10	7.88395e-06	7.41942e-06
P07943	1.62367e-05	1.88123e-05	1.82623e-05	1.63593e-05	1.65918e-05	1.09615e-05	1.68235e-05	1.40655e-05	1.35447e-05	1.48585e-05	1.83173e-05	1.0795e-05
Q9JHY2	1.92777e-05	1.79076e-05	1.821e-05	1.77628e-05	2.01292e-05	1.27674e-05	1.75977e-05	1.90291e-05	1.70217e-05	1.80439e-05	1.92029e-05	1.53766e-05
Q5XI34	4.63936e-05	4.64204e-05	4.16567e-05	4.36314e-05	4.43478e-05	2.50149e-05	4.74653e-05	3.79081e-05	4.1427e-05	4.43872e-05	4.34763e-05	1.78235e-05
P52481	1.47241e-05	1.83423e-05	1.80989e-05	1.48977e-05	1.44326e-05	1.70153e-05	1.39959e-05	1.05225e-05	1.58334e-05	1.5394e-05	1.52727e-05	1.29523e-05
P11348	1.09004e-05	8.36917e-06	1.45313e-05	7.62233e-06	6.84414e-06	4.96536e-06	7.87834e-06	5.3764e-06	1.58785e-05	1.07528e-05	8.03662e-06	1.01468e-05
Q561S0	1.29625e-05	2.30842e-05	1.57253e-05	1.48975e-05	1.40812e-05	1.31119e-05	1.40068e-05	1.55272e-05	1.41096e-05	1.76422e-05	1.36232e-05	1.33886e-05
O08557	4.62499e-06	6.35616e-06	5.57646e-06	3.49815e-06	5.51784e-06	2.74296e-06	4.31945e-06	3.68075e-06	3.98396e-06	4.45158e-06	3.95947e-06	2.76806e-06
Q5PQN0	4.2969e-05	4.87348e-05	3.42608e-05	4.14997e-05	3.79598e-05	1.08449e-05	4.34594e-05	3.58434e-05	3.80834e-05	3.73573e-05	4.22945e-05	8.99304e-06
P11240	7.7436e-05	8.45e-05	6.8346e-05	6.7804e-05	7.65136e-05	4.20994e-05	6.1106e-05	4.62134e-05	5.73428e-05	7.76599e-05	6.40226e-05	3.61324e-05
Q9Z1B2	1.09148e-05	2.39899e-06	1.16391e-05	1.16826e-05	1.11046e-05	1.08616e-05	1.36944e-05	9.62985e-06	1.0196e-05	1.41793e-05	1.20525e-05	1.13063e-05
P33124	6.19618e-06	5.95011e-06	6.20195e-06	5.91186e-06	5.78829e-06	4.3241e-06	5.6236e-06	6.32019e-06	4.97764e-06	5.25408e-06	5.38252e-06	3.60649e-06
P33124-2	6.19618e-06	5.95011e-06	6.20195e-06	5.91186e-06	5.78829e-06	4.3241e-06	5.6236e-06	6.32019e-06	4.97764e-06	5.25408e-06	5.38252e-06	3.60649e-06
Q99MZ8	7.6419e-06	1.01517e-05	7.65746e-06	2.08255e-05	1.82666e-05	9.36546e-06	9.48689e-06	7.6232e-06	5.25064e-06	1.30823e-05	1.75915e-05	5.8324e-06
P63029	4.32048e-06	1.47768e-05	1.26153e-05	1.5813e-05	2.67626e-11	1.64764e-05	2.77561e-05	1.29607e-05	1.44173e-05	1.16608e-05	1.02612e-05	9.1434e-06
P11730	0.000352731	0.000423539	0.000381474	0.000393555	0.000338199	5.29375e-05	0.000369187	0.000202657	0.000294035	0.000368541	0.000407236	5.52719e-05
Q5RJQ4	3.06758e-05	3.12714e-05	4.0106e-05	4.72739e-05	3.39749e-05	2.39594e-05	2.85874e-05	2.03532e-05	3.88067e-05	3.68639e-05	2.6517e-05	2.71621e-05
D4A2G9	1.2881e-05	1.22559e-05	1.18955e-05	1.23982e-05	1.29226e-05	6.24994e-06	1.33175e-05	1.24172e-05	1.31927e-05	1.23194e-05	1.20445e-05	7.74447e-06
D3ZKD9	4.91028e-05	6.1676e-05	7.76809e-05	6.6251e-05	6.96104e-05	4.58448e-05	7.01944e-05	5.5597e-05	6.54445e-05	6.86984e-05	8.45814e-05	1.36158e-05
P02688-5	0.000437424	0.000868053	0.000949829	0.00100386	0.000688342	0.000434166	0.000786257	0.000549663	0.00104414	0.000845654	0.00061903	0.000412483
Q5BJT9	0.000111495	0.000126784	0.000128549	0.000126825	0.000140738	4.52817e-05	0.00013183	0.000126579	0.000120284	0.000135886	0.000125399	4.43057e-05
Q9WUC4	4.66342e-06	3.70535e-06	2.91072e-06	3.16415e-06	3.62404e-06	3.74754e-06	3.86393e-06	4.01807e-06	2.00343e-06	3.69653e-06	3.45086e-06	1.5127e-06
M0R5N3	1.05298e-05	1.12658e-05	1.29341e-05	1.56795e-05	8.72974e-06	1.4497e-05	1.03089e-05	1.17641e-05	1.6783e-05	1.48346e-05	1.44212e-05	1.22575e-05
F1LPP3	4.87264e-05	3.92721e-05	4.76318e-05	4.1382e-05	4.45369e-05	4.00833e-05	4.53918e-05	3.82315e-05	4.76649e-05	4.67634e-05	4.61104e-05	2.5468e-05
Q4KM73	4.29943e-06	7.30877e-06	8.43068e-06	5.43587e-06	5.37629e-06	4.71098e-06	7.79406e-06	7.57836e-06	6.80616e-06	6.72726e-06	7.41867e-06	5.73283e-06
P37377	8.85833e-05	0.000108015	0.000107576	0.000100294	0.000112864	9.26026e-05	0.000102529	9.99482e-05	9.14621e-05	0.000111934	0.000110189	6.34057e-05
Q5FVI4	1.50603e-05	3.26437e-05	2.71199e-05	4.27854e-05	3.94932e-05	4.00189e-05	3.7513e-05	2.44665e-05	1.21028e-05	4.06147e-05	3.88952e-05	3.51589e-05
Q64119	1.59486e-05	1.63922e-05	9.97564e-06	1.51982e-05	1.61946e-05	7.8098e-06	1.68745e-05	1.49568e-05	1.06486e-05	1.77262e-05	1.78813e-05	1.09606e-05
P62243	1.14427e-05	1.28987e-05	7.00846e-06	1.09731e-05	1.27251e-05	9.33244e-06	9.81484e-06	8.88499e-06	1.02926e-05	1.15482e-05	1.11548e-05	8.29663e-06
D4ACV3	0.000166757	0.000199564	0.000237122	0.000233623	0.00022122	0.000112114	0.000223563	0.000209746	0.000197477	0.000226438	0.000194753	0.000116452
P62142	1.90223e-05	2.48862e-05	1.85764e-05	1.88835e-05	1.82045e-05	1.525e-05	2.07241e-05	1.71683e-05	1.30033e-05	2.08015e-05	1.79464e-05	1.84724e-05
G3V8C4	1.37635e-06	2.00705e-06	2.20769e-06	2.39772e-06	1.32368e-06	2.3775e-06	2.35688e-06	2.14418e-06	5.20956e-06	2.22698e-06	3.07454e-06	2.57189e-06
Q5HZV9	4.34758e-06	6.36342e-06	9.56357e-06	5.45213e-06	6.74468e-06	5.15458e-06	5.61956e-06	5.4283e-06	6.51288e-06	5.15646e-06	6.3296e-06	4.70143e-06
P68403-2	2.71783e-05	2.26694e-05	2.43145e-05	2.61327e-05	1.91302e-05	1.52128e-05	1.93829e-05	1.98386e-05	2.19587e-05	2.37193e-05	1.94606e-05	1.48545e-05
P49242	1.03523e-05	1.11981e-05	9.51536e-06	1.00277e-05	9.72581e-06	5.67517e-06	1.06221e-05	6.65708e-06	6.1885e-06	1.04326e-05	6.28064e-06	5.9396e-06
F1LNI8	0.000405387	0.000500269	0.000433446	0.000464963	0.000399094	9.47276e-05	0.000451328	0.000289751	0.000359269	0.000436434	0.000474922	0.000151918
Q499Q4	1.00395e-05	7.65839e-06	5.71402e-06	1.01614e-05	7.87353e-06	6.86455e-06	8.48805e-06	8.26253e-06	8.80577e-06	1.07592e-05	9.95306e-06	5.86454e-06
Q5BK63	1.78743e-05	1.76941e-05	2.21128e-05	1.77824e-05	1.69919e-05	1.0708e-05	1.57087e-05	1.57199e-05	1.79338e-05	1.45658e-05	1.65936e-05	1.53063e-05
D4A9L5	1.17724e-05	1.46894e-05	1.42128e-05	1.19593e-05	1.27565e-05	9.18615e-06	1.40488e-05	1.14032e-05	1.40901e-05	1.45734e-05	1.3984e-05	1.1559e-05
Q5U318	1.6943e-05	1.42591e-05	1.69928e-05	1.37504e-05	1.44286e-05	1.33895e-05	1.50801e-05	1.15833e-05	1.39658e-05	1.99283e-05	1.04845e-05	1.50531e-05
M0RCL5	0.000250105	0.000199564	0.000237122	0.000233623	0.00022122	0.000112114	0.000223563	0.000209746	0.000197477	0.000226438	0.000194753	0.000116452
D3ZLT1	5.83932e-06	5.51024e-06	7.68283e-06	8.57892e-06	9.40033e-06	7.66451e-06	9.45632e-06	8.06248e-06	7.43276e-06	9.26665e-06	9.09883e-06	4.05218e-06
Q8R2H0	9.18037e-06	1.50399e-05	1.44944e-05	2.68079e-05	2.9168e-05	1.52108e-05	1.54596e-05	3.00626e-05	2.16175e-05	2.66051e-05	1.67477e-05	1.20382e-05
Q5XI78	1.53235e-05	1.57285e-05	1.57479e-05	1.42514e-05	1.29194e-05	9.91735e-06	1.35843e-05	1.57049e-05	1.31269e-05	1.24053e-05	1.579e-05	7.96945e-06
P60892	7.83414e-06	7.81285e-06	1.16314e-05	9.97987e-06	1.11292e-05	6.72828e-06	6.3669e-06	1.02535e-05	1.04717e-05	7.55411e-06	9.30026e-06	3.97684e-06
G3V7U2	3.71528e-05	3.69299e-05	4.21068e-05	4.15134e-05	4.15702e-05	2.47611e-05	4.57707e-05	3.40811e-05	3.38723e-05	4.75058e-05	3.99355e-05	2.92267e-05
B2RYS8	9.44024e-06	8.487e-06	1.26069e-05	1.05806e-05	1.19958e-05	5.92022e-06	1.22561e-05	1.37099e-05	1.18922e-05	1.11269e-05	1.57632e-05	3.074e-06
O35814	1.98484e-05	2.16877e-05	1.8638e-05	2.00943e-05	2.21262e-05	1.65661e-05	2.13878e-05	1.88983e-05	2.06175e-05	2.33923e-05	2.22765e-05	1.52816e-05
P06686	0.000373104	0.000374808	0.000373881	0.000391342	0.000393052	0.000190968	0.000387105	0.000429366	0.000418335	0.000433468	0.000502565	0.000242232
Q68FX0	2.56848e-05	2.52936e-05	2.14989e-05	2.40973e-05	2.48951e-05	1.97042e-05	2.44926e-05	2.29027e-05	2.00684e-05	2.66835e-05	2.47198e-05	1.97491e-05
G3V826	2.33159e-05	2.69571e-05	2.06409e-05	2.74587e-05	2.63368e-05	1.76807e-05	2.47813e-05	2.12095e-05	2.16729e-05	2.76781e-05	2.448e-05	1.81964e-05
Q5XI32	1.70487e-05	1.82014e-05	1.6935e-05	1.9542e-05	1.88236e-05	1.57867e-05	1.91742e-05	1.43132e-05	1.82088e-05	1.6852e-05	2.2646e-05	1.34745e-05
P10111	0.000175932	0.000263547	0.000231216	0.000246982	0.000244995	9.49371e-05	0.000269648	0.000119765	0.00023694	0.000256555	0.00021512	0.000126095
Q68FQ0	9.23391e-06	1.03597e-05	7.34992e-06	9.94761e-06	9.13928e-06	9.77185e-06	1.04484e-05	5.96372e-06	9.71239e-06	1.12456e-05	9.40103e-06	7.83383e-06
F1LRI7	1.19272e-05	1.26002e-05	1.1472e-05	1.33793e-05	1.27066e-05	8.85742e-06	1.33946e-05	9.72695e-06	1.28596e-05	1.46662e-05	1.41228e-05	8.38975e-06
B3GNI6-3	2.59745e-05	2.92393e-05	2.68642e-05	2.45487e-05	2.57793e-05	7.33322e-06	2.56434e-05	2.10334e-05	2.42218e-05	3.56428e-05	2.68619e-05	1.8265e-05
P50137	2.33159e-05	2.69571e-05	2.06409e-05	2.74587e-05	2.63368e-05	1.76807e-05	2.47813e-05	2.12095e-05	2.16729e-05	2.76781e-05	2.448e-05	1.81964e-05
O08875	1.61588e-05	1.14834e-05	1.29776e-05	1.30122e-05	1.5364e-05	1.31244e-05	1.22838e-05	1.31829e-05	1.25326e-05	1.06859e-05	1.28996e-05	1.11159e-05
P19944	1.57279e-05	1.49268e-05	1.20057e-05	1.17539e-05	1.40133e-05	1.2564e-05	1.84352e-05	1.30532e-05	1.08089e-05	1.32945e-05	1.17424e-05	1.56024e-05
P85970	1.2796e-05	2.60368e-05	2.27179e-05	1.89648e-05	1.8805e-05	1.82461e-05	1.82712e-05	1.56132e-05	1.71938e-05	1.83836e-05	1.91892e-05	9.7784e-06
P81155	2.52283e-05	4.30965e-05	2.5957e-05	2.48821e-05	2.69781e-05	1.49427e-05	2.46496e-05	3.34783e-05	1.8162e-05	2.72449e-05	3.9143e-05	1.68976e-05
Q9QUH6	1.80699e-05	1.99281e-05	1.9685e-05	1.94588e-05	1.77899e-05	1.65182e-05	1.97627e-05	1.59336e-05	1.79373e-05	1.69641e-05	1.7731e-05	1.12519e-05
B2RYG6	1.69474e-05	1.46157e-05	1.83675e-05	1.50775e-05	1.82337e-05	1.30402e-05	1.42451e-05	1.66479e-05	1.48226e-05	1.35021e-05	1.76523e-05	1.10803e-05
P62329	4.99954e-05	4.82404e-05	5.8296e-05	5.32743e-05	5.04772e-05	2.506e-05	5.61498e-05	5.45579e-05	6.54886e-05	5.66735e-05	7.71858e-05	6.53306e-05
D4A0T0	1.97463e-05	1.84015e-05	1.95567e-05	1.92495e-05	2.23823e-05	1.64896e-05	1.91642e-05	2.13471e-05	1.62761e-05	1.93918e-05	2.05418e-05	1.48899e-05
P63041	1.81168e-05	2.66112e-05	1.93651e-05	1.95295e-05	1.84355e-05	5.28997e-06	2.01321e-05	1.19885e-05	1.79407e-05	2.58319e-05	1.92071e-05	1.42476e-05
Q6P503	1.25828e-05	8.85811e-06	1.73761e-05	1.28497e-05	1.19932e-05	1.05002e-05	9.24831e-06	1.31596e-05	1.15157e-05	1.27787e-05	1.03564e-05	1.13904e-05
Q9QUH6-4	1.80699e-05	1.99281e-05	1.9685e-05	1.94588e-05	1.77899e-05	1.65182e-05	1.97627e-05	1.59336e-05	1.79373e-05	1.69641e-05	1.7731e-05	1.12519e-05
Q9WUS0	4.59474e-06	9.44894e-06	4.42936e-06	6.06563e-06	6.70293e-06	3.87321e-06	6.35227e-06	5.9273e-06	3.97445e-06	5.26298e-06	6.20315e-06	5.86126e-06
B2RYP0	1.49385e-05	1.71903e-05	1.63819e-05	1.59335e-05	1.38706e-05	5.54784e-06	1.74951e-05	1.40203e-05	1.72528e-05	1.68838e-05	1.76429e-05	1.12807e-05
O35509	1.05808e-05	1.44724e-05	1.41422e-05	9.11713e-06	1.12391e-05	7.56762e-06	1.4623e-05	1.42647e-05	9.709e-06	1.57341e-05	1.38401e-05	1.1287e-05
P32551	6.34631e-05	7.04911e-05	4.96422e-05	5.97875e-05	5.66435e-05	4.75712e-05	6.21852e-05	4.91418e-05	5.60087e-05	7.00612e-05	6.13916e-05	4.08877e-05
D3ZQL7	3.89496e-05	3.38649e-05	3.424e-05	3.68812e-05	3.10379e-05	2.64455e-05	3.54765e-05	2.9394e-05	3.73164e-05	3.97178e-05	3.2289e-05	3.84088e-05
P85845	2.46973e-05	2.47597e-05	2.92425e-05	2.77251e-05	2.55087e-05	2.10296e-05	2.77957e-05	2.43795e-05	3.23957e-05	2.66218e-05	2.49734e-05	2.42219e-05
O35095	4.28191e-05	7.05791e-05	4.97939e-05	6.07552e-05	4.50752e-05	2.83338e-05	6.11959e-05	3.54396e-05	4.88546e-05	5.68623e-05	5.01791e-05	2.49623e-05
D3ZDH8	2.97705e-05	2.74413e-05	3.18183e-05	2.66483e-05	3.1879e-05	1.89749e-05	2.81873e-05	2.4538e-05	2.70814e-05	3.16388e-05	2.57283e-05	2.09775e-05
M0R776	3.04026e-06	5.56762e-06	4.41279e-06	4.40444e-06	5.81442e-06	2.76771e-06	5.9655e-06	4.79782e-06	4.68164e-06	5.72103e-06	5.40674e-06	4.91839e-06
Q63610-2	3.44742e-05	3.40026e-05	1.66622e-05	3.19258e-05	3.53288e-05	2.48239e-05	3.4611e-05	3.20479e-05	2.84788e-05	3.56061e-05	3.40782e-05	1.72772e-05
Q9QUH6-5	1.80699e-05	1.99281e-05	1.9685e-05	1.94588e-05	1.77899e-05	1.65182e-05	1.97627e-05	1.59336e-05	1.79373e-05	1.69641e-05	1.7731e-05	1.12519e-05
M0R3X6	3.76335e-06	5.72188e-07	2.04519e-06	4.24694e-06	2.14431e-06	1.56075e-06	5.79693e-06	2.74621e-06	2.15953e-06	5.36774e-06	2.82318e-06	8.93279e-07
P21670	4.47316e-06	5.92363e-06	4.46561e-06	5.34744e-06	5.15921e-06	3.15285e-06	5.85101e-06	4.77797e-06	3.73985e-06	4.95791e-06	3.90514e-06	4.19888e-06
P54313	0.000105206	9.64736e-05	0.000103846	8.98263e-05	9.26208e-05	0.000102151	0.00012696	7.3739e-05	0.000121044	0.000138689	0.000105349	9.65007e-05
Q8VI04	9.66433e-06	1.19257e-05	1.35688e-05	9.38644e-06	8.34888e-06	9.4287e-06	9.53669e-06	7.90094e-06	1.16306e-05	1.16316e-05	9.81889e-06	9.17542e-06
P63329	7.79877e-05	0.000112063	8.32967e-05	0.000101525	7.97824e-05	7.01406e-05	9.58715e-05	8.0932e-05	7.78642e-05	8.93765e-05	9.8241e-05	6.68068e-05
D3ZT07	2.97705e-05	2.74413e-05	3.18183e-05	2.66483e-05	3.1879e-05	1.89749e-05	2.81873e-05	2.4538e-05	2.70814e-05	3.16388e-05	2.57283e-05	2.09775e-05
P20070	5.8201e-06	5.68072e-06	6.0176e-06	6.85319e-06	7.57191e-06	3.61126e-06	6.12207e-06	6.17287e-06	5.60444e-06	6.16419e-06	5.44014e-06	3.99141e-06
D4A5T1	2.82082e-10	1.19915e-10	1.5135e-10	1.06859e-10	2.09914e-10	8.55378e-07	1.17764e-11	1.61023e-11	1.875e-10	9.64995e-11	1.82732e-10	3.88369e-11
Q9EPC6	3.77459e-05	5.92528e-05	4.13186e-05	4.03342e-05	5.31166e-05	3.18811e-05	4.21514e-05	3.26126e-05	3.77749e-05	4.268e-05	4.04522e-05	2.83679e-05
P85971	4.37178e-06	4.43663e-06	5.42892e-06	4.98304e-06	3.78975e-06	2.54335e-06	4.71295e-06	2.74793e-06	5.13434e-06	4.9053e-06	4.19698e-06	2.01853e-06
Q9R1Z0-2	2.23727e-05	4.25642e-05	2.57939e-05	2.13543e-05	2.4863e-05	1.25422e-05	2.14031e-05	2.7049e-05	1.61557e-05	1.98669e-05	2.69096e-05	1.24736e-05
Q6PDV7	5.32053e-06	4.17686e-06	5.01072e-06	4.0691e-06	4.96645e-06	4.89368e-06	5.03414e-06	4.34203e-06	4.15214e-06	4.02692e-06	4.02987e-06	4.54824e-06
Q07266	2.33731e-05	3.45434e-05	2.41429e-05	2.45031e-05	2.59123e-05	2.03041e-05	2.41789e-05	2.11709e-05	2.14073e-05	2.34385e-05	2.43558e-05	2.02925e-05
A0JPJ7	7.21085e-06	8.42356e-06	6.84534e-06	6.82167e-06	7.58594e-06	5.17814e-06	8.71897e-06	9.54035e-06	7.68772e-06	8.82159e-06	7.56957e-06	4.13742e-06
Q6AYH5	1.78939e-05	2.07037e-05	1.60961e-05	1.82731e-05	1.52847e-05	6.15108e-06	1.42833e-05	6.74741e-06	1.49809e-05	1.98918e-05	1.45413e-05	9.1522e-06
M0RC65	3.45797e-05	9.36984e-05	9.22618e-05	7.97347e-05	0.000102321	7.53453e-05	8.92583e-05	8.74035e-05	9.49008e-05	8.39367e-05	8.97721e-05	3.36978e-05
P13264	1.75263e-05	2.11961e-05	1.74605e-05	1.98961e-05	1.99715e-05	1.39524e-05	1.98326e-05	1.91312e-05	1.80886e-05	1.90882e-05	2.16014e-05	1.41039e-05
B5DF65	8.02293e-06	1.0733e-05	1.28577e-05	9.98987e-06	8.95569e-06	6.15077e-06	1.09792e-05	7.2807e-06	1.07934e-05	1.05216e-05	8.06624e-06	2.54566e-06
G3V7I0	2.1532e-05	2.43907e-05	2.46517e-05	2.07347e-05	2.44698e-05	9.82258e-06	2.26987e-05	1.64555e-05	1.98896e-05	2.35275e-05	2.19496e-05	1.05923e-05
P11232	4.02277e-05	4.65086e-05	4.94787e-05	2.92866e-05	4.64094e-05	3.13874e-05	4.86218e-05	1.34708e-05	4.01747e-05	4.92112e-05	1.85208e-05	3.36921e-05
P08461	4.83607e-05	4.7074e-05	4.46533e-05	4.67974e-05	4.32514e-05	4.21113e-05	4.32915e-05	4.7176e-05	4.78496e-05	5.18528e-05	5.24714e-05	4.37901e-05
D3ZRX4	4.91028e-05	6.1676e-05	7.76809e-05	6.6251e-05	6.96104e-05	4.58448e-05	7.01944e-05	5.5597e-05	6.54445e-05	6.86984e-05	8.45814e-05	1.36158e-05
Q6P6R2	4.05016e-05	4.34439e-05	3.7229e-05	3.97975e-05	4.23187e-05	3.31729e-05	3.90298e-05	3.63786e-05	3.67102e-05	4.26116e-05	4.64489e-05	3.12022e-05
Q8R431	3.57719e-06	4.79913e-06	3.13543e-06	4.17429e-06	2.04598e-06	1.95783e-06	3.35091e-06	2.22857e-06	2.29576e-06	2.9005e-06	3.89612e-06	3.43035e-06
P12075	2.76978e-05	4.55756e-05	4.83594e-05	3.71093e-05	3.68818e-05	4.37726e-05	4.48963e-05	2.01701e-05	3.8369e-05	4.82631e-05	4.49598e-05	2.14822e-05
P28480	8.80154e-06	9.50061e-06	8.83008e-06	7.7893e-06	8.09433e-06	6.44322e-06	8.32564e-06	9.35394e-06	8.87837e-06	8.82985e-06	1.14021e-05	6.27769e-06
F7ESM5	3.02639e-06	3.89447e-06	2.45538e-06	3.29025e-06	3.35228e-06	2.81104e-06	4.32029e-06	2.59961e-06	1.79446e-06	3.35459e-06	3.9691e-06	1.69265e-06
Q63028	2.25895e-05	2.66952e-05	2.20193e-05	2.17023e-05	2.17076e-05	1.1094e-05	2.17749e-05	1.92998e-05	1.67333e-05	3.23756e-05	2.44699e-05	1.04116e-05
B0BNE5	8.934e-06	1.01112e-05	6.96228e-06	8.77021e-06	8.29506e-06	4.3268e-06	9.10175e-06	8.64287e-06	8.64701e-06	9.51481e-06	9.42204e-06	6.21733e-06
Q6P502	1.46126e-05	2.10566e-05	1.61816e-05	1.47652e-05	2.55487e-05	1.28484e-05	1.56938e-05	1.35304e-05	1.77082e-05	1.40268e-05	2.24989e-05	1.21675e-05
Q91Y81	9.26363e-06	1.05161e-05	1.30244e-05	1.04687e-05	1.07687e-05	6.45998e-06	9.89006e-06	8.85774e-06	9.58911e-06	1.10898e-05	1.15131e-05	5.47239e-06
Q6RUV5	3.92775e-05	4.92798e-05	4.18293e-05	4.98761e-05	4.10334e-05	2.3992e-05	4.91533e-05	4.77397e-05	5.08044e-05	5.68672e-05	6.8456e-05	2.90561e-05
P62824	2.56752e-05	8.06846e-05	6.8743e-05	5.79596e-05	3.40435e-05	2.00016e-05	7.26679e-05	5.97384e-05	5.40741e-05	7.1106e-05	6.7355e-05	4.09167e-05
P47860	2.46141e-05	2.67956e-05	2.37254e-05	2.20533e-05	2.47475e-05	1.69173e-05	2.53967e-05	1.83872e-05	2.46668e-05	2.40901e-05	2.12256e-05	1.76684e-05
P60905	1.2712e-05	1.01302e-05	9.39583e-06	1.20028e-05	1.00789e-05	8.97329e-06	1.1524e-05	8.32461e-06	8.40871e-06	9.88856e-06	9.49538e-06	7.89676e-06
D4A6X4	2.48387e-06	1.60783e-06	2.80898e-06	3.47014e-06	1.29821e-06	1.78706e-06	3.12737e-06	2.40568e-06	2.54667e-06	2.80294e-10	2.21664e-06	1.17794e-06
Q5XIH7	1.85744e-05	1.51093e-05	3.15038e-05	1.34565e-05	1.89361e-05	1.29044e-05	1.87785e-05	1.71231e-05	2.31902e-05	1.64021e-05	1.60516e-05	1.20034e-05
P61265	4.87262e-05	4.81091e-05	4.75547e-05	4.67322e-05	5.2828e-05	3.90635e-05	5.22785e-05	4.91379e-05	5.68115e-05	5.83953e-05	5.21393e-05	3.49716e-05
P84087	4.37379e-05	6.29855e-05	4.49153e-05	4.96689e-05	4.50312e-05	3.17825e-05	5.3078e-05	4.88937e-05	3.52266e-05	5.40764e-05	5.73429e-05	3.53005e-05
B5DFG5	3.0028e-05	2.99443e-05	2.7112e-05	2.80276e-05	2.84743e-05	7.11146e-06	2.87067e-05	2.28901e-05	2.61845e-05	3.62408e-05	2.76624e-05	1.92012e-05
A0A0A0MXW3	0.000103648	0.000126734	0.000164726	0.000140428	0.000145363	0.000113493	0.0001468	0.000124496	0.000136258	0.00013985	0.000126275	6.77395e-05
G3V8V3	2.36627e-05	2.47725e-05	2.70093e-05	2.38814e-05	2.7526e-05	1.62043e-05	2.37849e-05	2.27793e-05	2.42166e-05	2.63267e-05	2.88685e-05	8.04195e-06
D4A9C3	1.23614e-05	1.03897e-05	9.95702e-06	1.46714e-05	1.09588e-05	6.71223e-06	1.16424e-05	1.10107e-05	9.73948e-06	1.35025e-05	1.0389e-05	3.78119e-06
Q63610-3	3.44742e-05	3.40026e-05	1.66622e-05	3.19258e-05	3.53288e-05	2.48239e-05	3.4611e-05	3.20479e-05	2.84788e-05	3.56061e-05	3.40782e-05	1.72772e-05
Q712U5-2	9.69146e-06	5.5675e-06	1.81066e-10	9.77203e-06	1.07284e-05	5.63785e-06	1.07942e-05	5.13122e-06	9.61693e-06	1.05684e-05	6.63748e-06	9.45157e-06
F1LS98	2.71783e-05	2.26694e-05	2.43145e-05	2.57557e-05	1.91302e-05	1.52128e-05	1.93829e-05	1.99855e-05	2.17798e-05	2.37193e-05	2.10641e-05	1.48545e-05
F8WG91	5.95838e-06	5.93881e-06	6.56626e-06	5.70778e-06	5.58505e-06	2.08035e-06	6.1644e-06	5.04105e-06	5.74641e-06	6.31137e-06	4.29752e-06	3.02895e-06
G3V874	1.04433e-05	1.23426e-05	1.10076e-05	1.23732e-05	1.24331e-05	8.99819e-06	1.13138e-05	8.17934e-06	1.00971e-05	1.34294e-05	9.75992e-06	7.8779e-06
D3ZHV3	3.6749e-06	1.9738e-06	2.27656e-06	3.40363e-06	6.53267e-06	2.95902e-06	5.01617e-06	2.95634e-06	4.29138e-06	4.38728e-06	7.81293e-06	7.08124e-06
F1LM47	2.82766e-05	3.07242e-05	2.81043e-05	2.77682e-05	2.98165e-05	2.55228e-05	2.45835e-05	3.43175e-05	2.64254e-05	2.65364e-05	3.4875e-05	2.57777e-05
Q63092	1.95686e-05	2.02959e-05	1.90834e-05	2.06886e-05	2.49234e-05	1.75597e-05	2.02905e-05	2.21447e-05	1.70006e-05	1.71015e-05	1.97135e-05	1.6631e-05
P63245	8.03554e-06	8.33743e-06	1.00172e-05	8.28435e-06	8.42734e-06	7.90331e-06	9.7399e-06	8.04767e-06	8.78414e-06	8.98945e-06	8.43325e-06	7.24563e-06
M0R9I8	5.97073e-06	8.23697e-06	8.22556e-06	8.66008e-06	6.09614e-06	7.77702e-06	1.00688e-05	9.4916e-06	7.99261e-06	1.02081e-05	8.30562e-06	8.33989e-06
B2GV79	4.27743e-06	6.18098e-06	6.0073e-06	7.10491e-06	5.43194e-06	6.56345e-06	7.67111e-06	6.27773e-06	8.01723e-06	8.07078e-06	7.1743e-06	4.29119e-06
B5DEL8	1.30879e-05	1.36372e-05	1.64956e-05	1.26937e-05	1.17651e-05	1.09383e-05	1.3073e-05	1.07365e-05	1.28454e-05	1.31055e-05	1.04382e-05	1.27529e-05
Q9QVC8	3.90308e-06	3.40986e-06	1.64692e-06	3.92146e-06	3.82568e-06	1.99017e-06	3.80163e-06	1.4573e-06	1.90354e-06	5.24981e-06	4.44269e-06	2.18553e-06
Q5XI22	1.06496e-05	1.5832e-05	1.19524e-05	1.12661e-05	1.64879e-05	7.86921e-06	1.66866e-05	9.6811e-06	1.15851e-05	1.2433e-05	1.30258e-05	9.2683e-06
Q6GMN2-2	1.04093e-05	8.25066e-06	1.10697e-05	1.13666e-05	1.10838e-05	6.39245e-06	1.20514e-05	7.40685e-06	1.09531e-05	1.21998e-05	1.21302e-05	6.11146e-06
P35565	1.81295e-05	2.04954e-05	1.72192e-05	1.74215e-05	1.98824e-05	1.31014e-05	1.85027e-05	1.8545e-05	1.74291e-05	1.68451e-05	1.82332e-05	1.55116e-05
P29314	4.02225e-06	7.31925e-06	7.73706e-06	5.30294e-06	4.61898e-06	4.35733e-06	1.34686e-05	6.39285e-06	3.26126e-06	5.3042e-06	6.01171e-06	3.59871e-06
P68182	6.45593e-06	7.28866e-06	8.28131e-06	6.73684e-06	6.35924e-06	7.33348e-06	6.51897e-06	6.50255e-06	5.3201e-06	8.69431e-06	1.77438e-05	4.18828e-06
P21913	1.62953e-05	1.97984e-05	1.55802e-05	1.64174e-05	1.67559e-05	7.68466e-06	1.84257e-05	1.60627e-05	1.45613e-05	1.8432e-05	1.57913e-05	5.63495e-06
P62804	0.000142575	0.000188298	0.000179748	9.75003e-05	0.000119291	6.66633e-05	9.86212e-05	0.000161539	6.74448e-05	7.66756e-05	9.88026e-05	5.09481e-05
M0R809	4.52211e-06	4.4173e-07	4.93568e-06	1.57091e-06	2.62313e-06	3.31514e-06	4.81149e-06	2.23974e-07	2.67466e-06	6.69351e-06	8.15872e-07	4.67233e-06
Q6PDW4	7.35705e-06	4.53545e-06	5.97072e-06	6.70547e-06	3.5751e-06	5.88549e-06	7.56518e-06	6.11408e-06	4.56996e-06	6.68811e-06	5.12834e-06	4.11952e-06
O88989	0.000169333	0.000223445	0.000228209	0.000199486	0.000219951	0.000123465	0.000227755	0.000201874	0.000221514	0.000233335	0.000230834	0.000140395
Q9EQX9	3.85618e-05	3.78548e-05	4.24279e-05	3.88009e-05	3.84025e-05	2.0995e-05	3.68451e-05	2.86102e-05	3.69028e-05	3.78345e-05	3.15813e-05	1.90997e-05
P48004-2	2.54429e-06	5.9185e-06	6.36845e-06	5.39265e-06	5.35852e-06	4.14055e-06	6.54043e-06	7.20142e-06	5.79378e-06	6.41959e-06	2.59961e-06	4.80883e-06
G3V936	7.32917e-05	7.40559e-05	9.89516e-05	9.3185e-05	0.00010416	3.7686e-05	0.000100243	0.000103499	0.000114514	0.000105186	0.000103502	6.12206e-05
F1LPM4	8.52683e-06	6.8766e-06	6.60129e-06	8.71449e-06	7.38064e-06	6.65625e-06	5.64993e-06	7.46682e-06	6.77992e-06	7.14692e-06	7.41055e-06	6.11976e-06
Q62910-2	1.93778e-05	2.02252e-05	2.18994e-05	2.08025e-05	2.01087e-05	1.52385e-05	2.08598e-05	1.60586e-05	1.91361e-05	2.34851e-05	2.45262e-05	1.35359e-05
P62716	2.6462e-05	2.85302e-05	2.38352e-05	2.60684e-05	2.60137e-05	1.49814e-05	1.9798e-05	2.30831e-05	2.67938e-05	2.74501e-05	2.67072e-05	9.2198e-06
P63331	2.84232e-05	2.85302e-05	2.38352e-05	2.72094e-05	2.66595e-05	1.49814e-05	2.15785e-05	2.36558e-05	2.71496e-05	2.81707e-05	2.67072e-05	1.17223e-05
X1WI37	5.8466e-06	6.70804e-06	7.53861e-06	4.47452e-06	5.03525e-06	3.43456e-06	5.66675e-06	6.33868e-06	4.83235e-06	6.18575e-06	6.36175e-06	4.73361e-06
P31016	1.40808e-05	1.50537e-05	1.56867e-05	1.66169e-05	1.5243e-05	1.30992e-05	1.56863e-05	1.16279e-05	1.54288e-05	1.67076e-05	1.44712e-05	1.00052e-05
Q5M7T6	4.14921e-05	4.59071e-05	4.35137e-05	4.17834e-05	4.63026e-05	2.29505e-05	4.5738e-05	3.87025e-05	3.92023e-05	4.6123e-05	4.50648e-05	2.38154e-05
Q6MG60	6.97955e-06	7.11712e-06	7.17199e-06	8.66661e-06	4.97475e-06	5.48968e-06	3.5543e-06	5.6036e-06	8.37918e-06	5.45487e-06	6.89607e-06	6.41475e-06
P18418	2.59717e-05	3.81216e-05	2.02769e-05	2.97416e-05	3.23894e-05	2.15223e-05	3.27374e-05	2.83846e-05	2.49861e-05	3.74585e-05	2.78532e-05	2.47354e-05
Q75Q39	9.59532e-06	9.62212e-06	8.97512e-06	8.81302e-06	1.09122e-05	6.48061e-06	9.69282e-06	1.15365e-05	8.32734e-06	1.02701e-05	1.17743e-05	7.43621e-06
D4ACM4	6.29531e-06	7.28866e-06	8.28131e-06	6.73684e-06	6.35924e-06	7.33348e-06	6.51897e-06	6.1135e-06	5.23687e-06	8.69431e-06	1.77438e-05	4.01779e-06
P19511	5.61606e-05	5.48703e-05	4.34293e-05	4.91029e-05	4.70285e-05	5.18001e-05	5.36776e-05	5.14186e-05	4.97374e-05	4.69899e-05	4.56833e-05	3.88723e-05
M0RAQ6	5.17412e-05	5.09393e-05	5.04092e-05	4.71573e-05	5.27876e-05	4.63529e-05	4.43023e-05	5.5854e-05	3.93063e-05	4.54765e-05	5.1222e-05	4.06868e-05
D3ZC55	2.26517e-05	2.06477e-05	2.9499e-05	2.25702e-05	2.09943e-05	1.83415e-05	2.34524e-05	1.82828e-05	2.14695e-05	2.16099e-05	1.98831e-05	1.31783e-05
F2Z3R2	9.17955e-06	8.53671e-06	1.01428e-05	8.08345e-06	1.02793e-05	9.38293e-06	8.59875e-06	6.27914e-06	9.82453e-06	1.08957e-05	1.04168e-05	9.57006e-06
P14408-2	9.07478e-06	1.03056e-05	9.49633e-06	1.02082e-05	1.09618e-05	7.05753e-06	1.003e-05	7.8975e-06	1.08343e-05	1.12082e-05	8.64235e-06	8.36419e-06
F1LNF7	5.51906e-05	7.34451e-05	6.1454e-05	6.40395e-05	7.00959e-05	5.08358e-05	6.91457e-05	6.03185e-05	6.49183e-05	6.83479e-05	6.82412e-05	4.97281e-05
Q6AY84	1.06182e-05	9.98474e-06	1.34465e-05	1.34683e-05	9.97651e-06	1.02814e-05	1.12236e-05	9.82837e-06	1.08828e-05	1.08192e-05	9.90516e-06	9.3247e-06
D4ABR6	6.68321e-06	7.71482e-06	8.41587e-06	5.11069e-06	5.12332e-06	3.42744e-06	5.44175e-06	5.42628e-06	6.67826e-06	1.0135e-05	6.09497e-06	5.10376e-06
Q6P9V6	6.81811e-06	9.49698e-06	7.85865e-06	8.95719e-06	8.91063e-06	6.76519e-06	9.87919e-06	6.26401e-06	8.02437e-06	7.22503e-06	8.84179e-06	5.3728e-06
P03994	7.84457e-06	1.18555e-05	1.30809e-05	1.04038e-05	9.67121e-06	1.19863e-05	1.00697e-05	1.24104e-05	9.72808e-06	1.17203e-05	1.77177e-05	1.20723e-05
Q68FQ9	6.73743e-06	5.08568e-06	2.18421e-06	7.89978e-06	5.50709e-06	8.35581e-06	5.27712e-06	5.82795e-06	2.64836e-06	5.33128e-06	5.64645e-06	2.80277e-06
D3ZJ08	9.50303e-05	0.000108802	4.76308e-05	9.04065e-05	9.89091e-05	1.40017e-05	3.63118e-05	5.92334e-05	1.81316e-05	3.42718e-05	2.09625e-05	7.18962e-06
D3ZK97	9.50303e-05	0.000108802	4.76308e-05	9.04065e-05	9.89091e-05	9.82018e-06	3.63118e-05	5.92334e-05	1.81316e-05	3.42718e-05	2.09625e-05	7.18962e-06
B2RZ78	3.91045e-06	4.64224e-06	4.98512e-06	4.40088e-06	3.75799e-06	1.7152e-06	5.0949e-06	5.17492e-06	2.81806e-06	5.31747e-06	3.93922e-06	2.43532e-06
P70566	7.12775e-06	7.86415e-06	8.16918e-06	7.42498e-06	8.56067e-06	5.50007e-06	9.16736e-06	6.04362e-06	7.91816e-06	8.19989e-06	8.50491e-06	6.4763e-06
D4A9T3	1.71832e-05	1.7105e-05	1.73398e-05	1.76627e-05	1.84182e-05	1.08819e-05	1.80367e-05	1.65127e-05	1.59263e-05	1.92611e-05	1.66499e-05	1.28639e-05
P05197	1.46509e-05	1.43414e-05	1.43896e-05	1.11803e-05	1.22858e-05	1.67912e-05	1.88693e-05	2.94037e-05	2.91472e-05	8.59576e-06	1.67536e-05	1.58642e-05
P62271	9.82681e-06	9.78506e-06	4.63103e-06	7.0212e-06	8.03162e-06	6.13748e-06	9.47055e-06	1.0924e-05	4.68786e-06	6.68747e-06	1.01624e-05	6.52627e-06
P07340	0.000298687	0.000344339	0.000346632	0.00034798	0.000361554	0.000103969	0.000356825	0.000210848	0.000356227	0.000373207	0.000389361	6.9952e-05
Q5XIT1	1.26532e-05	8.73391e-06	1.50325e-05	1.33794e-05	1.03369e-05	1.15872e-05	1.37707e-05	1.20825e-05	1.18797e-05	1.49484e-05	1.53222e-05	1.16426e-05
B2RZA9	1.06916e-05	9.72971e-06	1.19872e-05	1.33099e-05	1.31262e-05	2.08428e-06	1.53035e-05	6.86998e-06	1.15425e-05	1.41217e-05	7.03551e-06	5.36195e-06
P13803	4.68362e-06	6.88625e-06	4.75038e-06	5.38118e-06	7.24811e-06	4.75858e-06	5.82303e-06	3.93997e-06	4.46927e-06	5.92753e-06	5.29718e-06	4.1471e-06
F7FEZ6	1.3741e-05	1.2534e-05	1.11342e-05	1.24503e-05	1.48061e-05	7.51225e-06	1.35476e-05	1.23936e-05	1.26453e-05	1.55642e-05	1.47348e-05	1.10416e-05
P62909	8.81651e-06	1.14943e-05	3.45454e-06	1.16163e-05	9.18558e-06	5.0995e-06	1.26907e-05	6.81625e-06	6.60411e-06	1.11922e-05	1.01897e-05	3.92175e-06
P21707	8.9842e-05	0.00010731	8.84602e-05	0.000108363	0.000102568	8.29276e-05	0.000105389	8.07734e-05	8.43567e-05	0.000108968	9.16174e-05	7.03354e-05
M0RBJ0	3.27991e-05	4.90037e-05	4.6057e-05	4.06811e-05	3.96072e-05	1.735e-05	4.5799e-05	2.56587e-05	4.10743e-05	4.16794e-05	3.24308e-05	2.45111e-05
D4A786	3.69502e-11	1.30829e-10	1.96322e-10	7.55347e-08	2.43924e-10	7.74085e-11	5.57979e-07	2.08176e-05	1.59404e-05	2.10076e-07	5.19522e-07	1.20076e-05
P06685	0.000321638	0.000317075	0.000298543	0.000340759	0.000331909	0.000190968	0.000340371	0.000354941	0.000363151	0.000389055	0.000410301	0.000242232
E9PTI1	3.56024e-05	2.60028e-05	1.92547e-05	3.34959e-05	3.37221e-05	1.89553e-05	3.18376e-05	2.22297e-05	2.15519e-05	3.32766e-05	2.33457e-05	1.56354e-05
Q4KM74	3.89691e-06	4.46306e-06	8.11039e-06	4.10985e-06	4.42106e-06	1.93671e-06	3.99885e-06	3.63769e-06	3.79305e-06	5.3234e-06	5.93313e-06	3.47944e-06
O55215	7.22249e-06	9.2746e-06	8.29951e-06	7.91456e-06	7.26322e-06	8.7235e-06	9.14763e-06	7.81956e-06	7.38807e-06	9.10154e-06	9.85266e-06	1.63803e-06
D3ZWM5	7.851e-05	0.000134966	0.000172773	0.000154338	0.00014604	8.39056e-05	0.000116454	6.96632e-05	0.000120867	0.000152361	0.000122864	6.13036e-05
Q63198	2.59851e-05	3.29512e-05	3.17855e-05	3.41927e-05	3.19502e-05	2.26399e-05	3.43261e-05	2.63121e-05	3.1627e-05	3.35348e-05	3.576e-05	1.74417e-05
P56536	2.36583e-06	2.3635e-06	3.63065e-06	1.85347e-06	3.57214e-06	2.16577e-06	2.50991e-06	4.08755e-06	3.32393e-06	2.34355e-06	2.21597e-06	2.59796e-06
P62832	8.14728e-06	7.22195e-06	7.7318e-06	9.02936e-06	7.30853e-06	7.40017e-06	9.72893e-06	6.72373e-06	5.19181e-06	8.47572e-06	6.61895e-06	6.54801e-06
Q68A21	8.59803e-06	1.14256e-05	1.06715e-05	1.31425e-05	1.1381e-05	1.07565e-05	1.09594e-05	9.44336e-06	7.1585e-06	1.33128e-05	9.80988e-06	9.93086e-06
Q5RJL0	1.7814e-06	3.06033e-06	2.86575e-06	3.05288e-06	3.25213e-06	1.18608e-06	2.00667e-06	1.24277e-06	1.84089e-06	2.59991e-06	2.68062e-06	1.61802e-06
Q5GFD9	7.08211e-06	7.49473e-06	8.58078e-06	7.21246e-06	9.38835e-06	4.19797e-06	9.80085e-06	8.48802e-06	6.8839e-06	7.92635e-06	9.11173e-06	6.01493e-06
F1LQY6	3.1772e-06	3.88777e-06	3.06309e-06	3.79223e-06	2.61526e-06	2.04532e-06	4.60657e-06	2.51643e-06	2.01005e-06	2.66245e-06	2.63525e-06	2.08393e-06
Q75Q41	4.81282e-06	4.11421e-06	5.63848e-06	4.13697e-06	5.51778e-06	4.00146e-06	5.82992e-06	5.55343e-06	6.05011e-06	6.139e-06	5.15597e-06	5.30147e-06
Q03114	3.10936e-06	2.12665e-06	2.47515e-06	2.52019e-06	2.0766e-06	3.40972e-06	2.59635e-06	2.25216e-06	1.27994e-06	2.15476e-06	2.67658e-06	1.30113e-06
Q5U2N2	4.21073e-06	4.9351e-06	3.63881e-06	4.21115e-06	3.88064e-06	1.58502e-06	4.86503e-06	3.64396e-06	2.64331e-06	4.35855e-06	4.5866e-06	2.45975e-06
Q66HM2	3.17994e-05	3.78191e-05	3.73095e-05	3.29167e-05	3.51443e-05	2.79631e-05	3.54268e-05	3.17598e-05	3.36522e-05	3.41068e-05	3.4391e-05	2.27258e-05
Q63570	3.20725e-06	2.87653e-06	3.91818e-06	2.55958e-06	3.76285e-06	2.20067e-06	2.6841e-06	2.85914e-06	4.19902e-06	3.60164e-06	2.04934e-06	1.58654e-06
P18484	3.17994e-05	3.78191e-05	3.73857e-05	3.29167e-05	3.51443e-05	2.79631e-05	3.54268e-05	3.17598e-05	3.36522e-05	3.41068e-05	3.4391e-05	2.27258e-05
F8WFS9	1.59823e-05	1.39161e-05	1.37777e-05	1.25326e-05	1.66311e-05	1.03146e-05	1.22262e-05	1.4271e-05	1.39505e-05	1.2724e-05	9.12436e-05	1.08209e-05
Q9QXY2-2	8.95873e-06	7.58624e-06	9.08458e-06	8.27079e-06	8.31067e-06	7.54787e-06	7.98776e-06	7.0983e-06	6.48277e-06	8.54935e-06	7.92728e-06	7.44848e-06
P06761	0.000119892	0.000121708	9.16253e-05	0.000116062	0.000120378	8.81678e-05	0.000131413	0.000101178	9.70562e-05	0.000151094	0.000115997	6.1549e-05
Q3KR86	1.93209e-05	1.95615e-05	2.15182e-05	1.99832e-05	1.93152e-05	1.39257e-05	1.75522e-05	2.07081e-05	1.7511e-05	1.76092e-05	2.1308e-05	1.33408e-05
Q80W89	1.37188e-05	1.31824e-05	1.22361e-05	1.20693e-05	1.16298e-05	1.0462e-05	1.12229e-05	9.05349e-06	9.34576e-06	1.15637e-05	9.47998e-06	7.90587e-06
P62628	6.30497e-06	7.32897e-06	5.43035e-06	1.01131e-05	9.13749e-06	4.56307e-06	2.14092e-06	9.41327e-06	7.60451e-06	1.14338e-05	4.96811e-06	4.4405e-06
G3V9L3	7.81002e-06	7.9364e-06	7.35882e-06	8.74234e-06	7.40581e-06	6.99505e-06	6.92053e-06	7.30412e-06	9.17073e-06	8.7493e-06	6.75278e-06	7.05913e-06
M0RAU4	0.00011655	0.000217318	0.000186474	0.000172417	0.000200161	0.000119885	0.000222176	0.00012214	0.000193989	0.000197053	0.000185043	0.000129609
P48037	6.68321e-06	7.71482e-06	8.41587e-06	5.11069e-06	5.12332e-06	3.53508e-06	5.44175e-06	5.42628e-06	6.67826e-06	1.0135e-05	6.09497e-06	5.10376e-06
P12369	8.60987e-06	8.6121e-06	8.17629e-06	8.58888e-06	1.00348e-05	7.69927e-06	8.74702e-06	7.52317e-06	9.11141e-06	1.11119e-05	7.43341e-06	6.3955e-06
P21571	3.25534e-05	3.66747e-05	2.81853e-05	3.31821e-05	3.77409e-05	1.43513e-05	3.43416e-05	3.00496e-05	3.08762e-05	3.88746e-05	3.42616e-05	2.32146e-05
P10824	6.42716e-05	8.52038e-05	7.74692e-05	7.89707e-05	7.96605e-05	1.71085e-05	7.88815e-05	2.74189e-05	8.37158e-05	8.43501e-05	9.22838e-05	1.41481e-05
D3ZP47	2.57916e-06	3.47709e-06	1.78942e-06	3.22813e-06	4.53098e-06	2.55386e-06	4.80191e-06	4.27017e-06	1.35309e-06	4.97765e-06	4.70875e-06	2.96533e-06
Q68FR6	1.35726e-05	1.21302e-05	1.39244e-05	1.05242e-05	1.28415e-05	9.32136e-06	1.66309e-05	1.08467e-05	1.45644e-05	1.72171e-05	1.44226e-05	9.50751e-06
Q7TP78	1.4832e-05	1.40744e-05	1.6946e-05	1.39901e-05	1.78564e-05	1.38187e-05	2.00651e-05	1.78165e-05	1.11253e-05	1.95739e-05	1.63907e-05	1.5329e-05
F1LR80	1.95686e-05	1.98811e-05	1.90834e-05	2.06886e-05	2.49234e-05	1.75597e-05	2.02905e-05	2.21447e-05	1.70006e-05	1.71015e-05	1.97135e-05	1.6631e-05
D4A0F5	4.24264e-05	4.04219e-05	3.68192e-05	4.15977e-05	4.06826e-05	2.44265e-05	4.08379e-05	3.40014e-05	3.88806e-05	4.09847e-05	3.85526e-05	2.31807e-05
P04904	1.23187e-05	1.26945e-05	1.91974e-05	1.55367e-05	1.42497e-05	1.05965e-05	1.49633e-05	9.88673e-06	1.43654e-05	1.48767e-05	1.58423e-05	1.01798e-05
F1M0L7	4.98513e-06	5.08995e-06	4.94407e-06	4.79988e-06	5.06541e-06	3.56832e-06	5.95005e-06	4.18159e-06	4.9389e-06	5.28459e-06	5.01088e-06	3.55881e-06
G3V9Z6	2.52509e-05	2.73985e-05	2.71822e-05	2.78533e-05	2.6444e-05	1.40154e-05	2.46206e-05	2.00463e-05	2.66998e-05	3.29923e-05	2.7082e-05	1.72518e-05
Q66HA6	1.2073e-05	9.03992e-06	1.17615e-05	9.71492e-06	1.08089e-05	8.68685e-06	1.18851e-05	1.27657e-05	1.10928e-05	9.55843e-06	9.23458e-06	9.35351e-06
D3ZPP2	1.2073e-05	9.03992e-06	1.17615e-05	9.71492e-06	1.08089e-05	8.51822e-06	1.18851e-05	1.27657e-05	1.10928e-05	9.55843e-06	9.23458e-06	9.35351e-06
F1M9V7	1.50113e-05	1.58537e-05	1.30791e-05	1.66186e-05	1.53585e-05	1.04513e-05	1.72842e-05	1.27364e-05	1.23818e-05	1.48054e-05	3.9521e-05	9.18052e-06
P19234	2.08111e-05	2.15409e-05	2.04378e-05	1.98913e-05	1.98331e-05	7.98661e-06	2.07667e-05	1.7379e-05	1.96066e-05	2.15716e-05	1.75743e-05	5.13506e-06
Q63396	3.88938e-07	1.60421e-06	3.75772e-06	5.01066e-07	3.99093e-06	2.86142e-06	1.31277e-06	3.43287e-06	2.32023e-06	4.14653e-06	2.21306e-10	3.99882e-06
D3ZUY8	2.95032e-05	3.78191e-05	3.82462e-05	3.19451e-05	3.32401e-05	2.56764e-05	3.52999e-05	2.83265e-05	3.36522e-05	3.37249e-05	3.40073e-05	2.16384e-05
Q568Z9	1.0091e-05	1.58938e-05	1.70039e-05	1.40339e-05	1.34181e-05	7.82939e-06	1.45991e-05	1.07723e-05	1.17641e-05	1.25595e-05	1.27593e-05	7.40874e-06
P10888	6.65931e-05	9.6648e-05	0.000124385	8.9174e-05	9.55339e-05	5.56671e-05	9.24623e-05	0.000100356	9.62802e-05	9.85741e-05	0.000114787	4.0863e-05
P00406	0.000102405	8.80873e-05	6.85864e-05	6.47739e-05	6.85879e-05	2.87917e-05	7.01e-05	8.89278e-05	7.99455e-05	7.11109e-05	7.02185e-05	3.74277e-05
O08839-2	1.59115e-05	1.64382e-05	1.68273e-05	1.4766e-05	1.56956e-05	1.60807e-05	1.57048e-05	1.07307e-05	4.46981e-05	1.69954e-05	1.47609e-05	1.62608e-05
Q4V7D2	5.59813e-06	7.56607e-06	4.75038e-06	5.19356e-06	3.4279e-06	3.68495e-06	4.76828e-06	4.41295e-06	1.81202e-06	2.58262e-06	3.80405e-06	3.46056e-06
D4AE68	1.26011e-05	1.76245e-05	1.67571e-05	2.01819e-05	1.81161e-05	7.20589e-06	1.92114e-05	1.86919e-05	1.84138e-05	1.55871e-05	2.24595e-05	5.35359e-06
Q5XIJ3	2.1486e-05	2.73419e-05	2.43785e-05	1.82593e-05	2.11212e-05	1.83722e-05	1.66696e-05	1.72687e-05	2.01244e-05	2.2054e-05	1.84449e-05	1.6677e-05
Q66HA8	2.45758e-05	2.67064e-05	1.48397e-05	2.67668e-05	2.40554e-05	1.27459e-05	2.91146e-05	2.44943e-05	2.17257e-05	1.98231e-05	2.64146e-05	1.89579e-05
Q5I0D1	4.39643e-06	2.95412e-06	3.87174e-06	2.5952e-06	5.09978e-06	4.23073e-06	4.92708e-06	3.72903e-06	5.32195e-06	3.8318e-06	3.28287e-06	3.92915e-06
P56574	6.50628e-06	7.18473e-06	8.10676e-06	7.00939e-06	8.2014e-06	7.51199e-06	7.80259e-06	6.99724e-06	7.46084e-06	8.17096e-06	8.51329e-06	9.51392e-06
Q5U204	6.30585e-07	8.41315e-07	1.13761e-06	5.56317e-07	7.1572e-07	4.02072e-07	6.9024e-07	1.03357e-06	7.13168e-07	6.46177e-07	1.19282e-06	6.42192e-07
B0BN93	2.51653e-06	2.52544e-06	2.24563e-06	1.65635e-05	8.11189e-06	2.07079e-06	2.49677e-06	2.27601e-06	1.00648e-06	1.9101e-06	2.24762e-06	1.7644e-06
G3V6P8	1.64897e-10	3.5314e-06	7.49092e-11	3.87391e-06	3.45381e-06	1.3196e-10	2.88757e-06	2.89085e-06	5.37251e-06	3.88131e-06	5.51068e-06	1.13177e-06
G3V6U3	3.82293e-06	5.75017e-06	4.19441e-06	5.14298e-06	4.24396e-06	2.61214e-06	5.04468e-06	4.97713e-06	5.46582e-06	3.01001e-06	4.3399e-06	2.75357e-06
Q6URK4	1.7836e-05	2.20693e-05	1.69825e-05	1.91118e-05	1.90852e-05	1.65943e-05	2.44776e-05	1.50527e-05	1.90844e-05	2.46355e-05	1.85342e-05	1.4572e-05
P38983	6.52154e-06	5.94489e-06	9.42919e-06	6.74471e-06	1.18023e-05	9.28078e-06	1.14031e-05	1.0362e-05	9.96786e-06	1.23094e-05	9.84528e-06	8.18184e-06
Q68FY0	4.52892e-05	5.81168e-05	4.5644e-05	4.25602e-05	5.52592e-05	3.86078e-05	4.69273e-05	4.6771e-05	4.74698e-05	4.84013e-05	4.45076e-05	4.47211e-05
Q6J4I0	3.43504e-06	2.18355e-06	3.49619e-06	3.0973e-06	2.4225e-06	7.14166e-07	3.01854e-06	2.69492e-06	1.99913e-06	3.07736e-06	2.64933e-06	3.24396e-06
G3V7J0	1.0394e-05	1.14338e-05	9.0019e-06	1.14301e-05	1.16586e-05	4.95074e-06	1.02105e-05	1.1124e-05	8.00113e-06	1.0005e-05	9.44981e-06	5.84087e-06
Q6PEC0	2.08501e-06	2.99571e-06	2.80313e-06	1.75594e-06	1.97649e-06	8.42806e-07	2.21716e-06	3.29573e-07	2.10087e-06	3.50944e-10	1.53127e-06	1.63929e-06
F1M2D3	7.97761e-05	0.0001264	7.41375e-05	7.52675e-05	8.59653e-05	2.53306e-05	7.48328e-05	9.11838e-05	5.52223e-05	7.8948e-05	9.90861e-05	2.30476e-05
Q63754	6.76283e-05	7.48792e-05	8.01486e-05	6.96257e-05	8.11929e-05	7.91878e-05	7.59541e-05	6.28593e-05	6.72406e-05	9.09032e-05	7.28424e-05	5.8084e-05
Q9QX69	1.23078e-05	1.40476e-05	1.40682e-05	1.34123e-05	1.26245e-05	8.35268e-06	1.15353e-05	8.90216e-06	1.28259e-05	1.34676e-05	1.24213e-05	4.15607e-06
D4A9L2	4.15982e-06	3.37096e-06	3.45302e-06	3.96693e-06	3.73305e-06	3.08172e-06	4.61348e-06	8.10451e-11	6.69546e-06	7.68028e-06	3.10938e-06	7.07438e-06
Q63610	3.44742e-05	3.40026e-05	1.66622e-05	3.19258e-05	3.53288e-05	2.48239e-05	3.4611e-05	3.20479e-05	2.84788e-05	3.56061e-05	3.40782e-05	1.72772e-05
P29147	7.81859e-06	9.46425e-06	6.26385e-06	7.47767e-06	8.90027e-06	4.41797e-06	3.89705e-05	8.0224e-06	5.71632e-06	9.20177e-06	8.13118e-06	3.91343e-06
F1LQN3	1.1762e-05	1.78138e-05	2.64854e-05	1.79558e-05	1.72705e-05	8.98466e-06	1.73663e-05	1.13491e-05	1.27323e-05	1.19742e-05	1.73787e-05	6.85311e-06
O08651	1.43509e-05	1.17724e-05	1.73155e-05	1.25562e-05	9.6257e-06	6.00927e-06	1.50476e-05	9.86234e-06	8.06225e-06	1.2246e-05	4.41393e-06	1.33218e-05
P61980	2.45648e-05	2.4928e-05	2.73575e-05	2.33235e-05	2.5055e-05	2.17584e-05	2.66293e-05	2.62049e-05	2.36826e-05	2.76207e-05	2.24637e-05	2.22361e-05
B0BN65	5.36453e-06	1.05132e-05	3.86856e-06	9.35616e-06	7.557e-06	4.5104e-06	8.75157e-06	4.53739e-06	8.61674e-06	7.22457e-06	8.0967e-06	2.9213e-06
F1LSQ6	2.54429e-06	5.9185e-06	7.82956e-06	5.39265e-06	5.35852e-06	4.14055e-06	6.54043e-06	7.20142e-06	5.79378e-06	6.41959e-06	2.59961e-06	4.80883e-06
Q5U2X8	3.26711e-06	5.65479e-05	4.57034e-06	4.3877e-06	5.55904e-06	4.79627e-06	5.7433e-06	5.49676e-06	4.00946e-06	5.36895e-05	4.97888e-06	2.82114e-06
B4F774	6.98197e-06	7.34474e-06	4.24586e-06	6.98077e-06	7.3206e-06	5.90365e-06	6.95731e-06	5.06683e-06	4.66136e-06	6.96393e-06	7.19788e-06	2.29679e-06
Q5XI90	5.80754e-06	5.7687e-06	5.88197e-06	6.23074e-06	5.43232e-06	6.84311e-06	6.68285e-06	7.46295e-06	6.77773e-06	5.31537e-06	5.71072e-06	7.30597e-06
O35353	8.41572e-05	6.74085e-05	5.89734e-05	5.66942e-05	5.85908e-05	5.3335e-05	0.000107824	4.93009e-05	9.34232e-05	0.000116449	0.000101088	6.25513e-05
D3ZMR1	7.21333e-07	1.98152e-06	1.93945e-06	7.23655e-07	1.32522e-06	2.14696e-10	7.63661e-11	7.18387e-07	8.34641e-07	1.24742e-06	2.56537e-07	1.41231e-07
B2GUZ9	7.52133e-06	1.06081e-05	8.58636e-06	9.50124e-06	6.23497e-06	4.67542e-06	7.31666e-06	7.44663e-06	9.41915e-06	7.28074e-06	8.95026e-06	2.46349e-06
B0K020	3.07939e-05	3.36429e-05	3.39462e-05	2.73994e-05	3.32707e-05	1.73296e-05	2.98947e-05	3.20532e-05	3.01081e-05	2.99111e-05	3.61835e-05	2.14461e-05
Q4FZY0	5.12168e-06	4.30463e-06	2.42929e-06	3.84251e-06	4.34427e-06	4.45301e-06	2.14e-06	2.78563e-06	1.59191e-06	3.93055e-06	7.24751e-06	1.88059e-06
P62836	5.73577e-06	5.74837e-06	5.71748e-06	6.56965e-06	6.82075e-06	6.98354e-06	1.84267e-05	1.52896e-05	8.52409e-06	4.5955e-06	7.41821e-06	6.28627e-06
Q62636	7.62076e-06	8.70493e-06	7.24356e-06	8.78718e-06	7.68001e-06	9.31325e-06	9.16788e-06	7.41821e-06	1.66803e-05	8.89302e-06	9.38746e-06	8.42666e-06
Q9JHL4	7.6155e-06	8.20257e-06	6.92072e-06	7.4809e-06	7.39719e-06	6.34203e-06	7.76384e-06	7.45214e-06	5.81329e-06	7.66883e-06	8.1979e-06	5.91125e-06
F1M8L6	9.45872e-06	8.60426e-06	1.34157e-06	8.07215e-06	1.07511e-05	7.72605e-06	9.05165e-06	1.02542e-05	6.46552e-06	5.30161e-06	5.27186e-06	1.38559e-06
Q9JMB3	1.04433e-05	1.23426e-05	1.10076e-05	1.23732e-05	1.24331e-05	8.99819e-06	1.13138e-05	8.17934e-06	1.00971e-05	1.34294e-05	9.75992e-06	7.8779e-06
Q641Z6	5.60052e-06	6.70261e-06	6.7907e-06	5.48985e-06	4.16916e-06	3.69423e-06	5.07486e-06	4.41459e-06	5.91356e-06	5.60295e-06	4.38267e-06	4.84468e-06
O35987	4.17582e-06	3.97973e-06	5.56899e-06	5.73354e-06	3.76663e-06	3.4429e-06	4.21467e-06	5.071e-06	6.61749e-06	6.83589e-06	3.24667e-06	5.27054e-06
Q68FU3	4.94701e-06	5.87687e-06	5.45887e-06	4.65712e-06	6.07778e-06	1.91907e-06	5.51453e-06	3.44298e-06	4.66186e-06	5.54974e-06	4.67943e-06	3.42502e-06
P20651	6.64177e-05	8.04735e-05	4.00073e-05	9.08398e-05	5.52417e-05	3.15605e-05	7.32759e-05	5.79942e-05	6.32111e-05	7.04368e-05	7.67743e-05	5.04463e-05
Q5RKJ9	1.74271e-05	7.15791e-05	6.4623e-05	5.46778e-05	2.10621e-05	1.15303e-05	6.17318e-05	4.82064e-05	5.50252e-05	5.82515e-05	5.88784e-05	3.6967e-05
P14141	1.64093e-10	1.50317e-06	1.4867e-10	1.726e-10	2.48667e-10	9.87995e-11	1.94318e-10	1.77826e-10	1.45238e-11	5.8627e-06	6.72388e-06	1.9319e-10
D3ZS58	7.24872e-06	1.27789e-05	7.91396e-06	6.07104e-06	1.06459e-05	3.47489e-07	1.15752e-05	9.65724e-06	2.88667e-06	1.08923e-05	1.15578e-05	4.98919e-06
R9PXR7	5.93423e-06	1.39513e-05	1.29366e-05	1.08258e-05	1.47322e-05	3.28336e-06	1.24441e-05	1.21331e-05	1.14765e-05	1.54854e-05	2.76235e-06	9.99518e-06
Q68FS4-2	2.5926e-06	4.65541e-06	5.72378e-06	3.60871e-06	4.14308e-06	3.77728e-06	3.64193e-06	3.76034e-06	5.00422e-06	3.82164e-06	3.57843e-06	3.86471e-06
P70550	1.40643e-05	6.74042e-05	5.98458e-05	5.3302e-05	3.34016e-05	2.17116e-06	7.24887e-05	5.07717e-05	5.06339e-05	6.91936e-05	5.66654e-05	2.89026e-05
F1LRL9	3.81341e-05	3.80363e-05	3.93487e-05	3.76773e-05	3.55539e-05	2.14909e-05	4.02421e-05	3.06624e-05	3.69798e-05	3.84446e-05	3.62858e-05	2.52814e-05
P17105	6.57139e-06	8.55383e-06	6.4747e-06	7.4904e-06	1.08265e-05	5.17625e-06	5.73696e-06	9.76978e-06	3.72967e-06	5.60261e-06	1.28704e-05	4.36946e-06
D3ZFA8	8.99414e-06	4.93485e-06	4.80521e-06	7.01982e-06	6.32282e-06	4.46922e-06	6.11347e-06	6.26119e-06	5.43332e-06	8.3688e-06	7.2612e-06	5.13326e-06
P15791-5	0.000405387	0.000500269	0.000433446	0.000464963	0.000399094	9.27222e-05	0.000451328	0.000249483	0.000359269	0.000436434	0.000474922	9.03997e-05
Q52KS1	3.26321e-05	3.71891e-05	3.60045e-05	3.26905e-05	3.48763e-05	2.49799e-05	3.32651e-05	3.22784e-05	3.10693e-05	3.09033e-05	3.5918e-05	2.40228e-05
P04692-3	2.76809e-05	2.85178e-05	1.55007e-05	2.65595e-05	3.01317e-05	2.22064e-05	2.83972e-05	3.06581e-05	2.80108e-05	2.96943e-05	3.232e-05	1.53987e-05
P84817	6.80955e-06	7.45477e-06	8.0318e-06	8.16742e-06	7.60172e-06	3.80063e-06	7.29197e-06	6.12989e-06	8.06437e-06	8.59322e-06	8.88083e-06	7.25983e-06
D3ZBS6	5.72924e-06	6.08482e-06	6.92e-06	6.92804e-06	6.59537e-06	4.86686e-06	7.47378e-06	5.99399e-06	7.23667e-06	7.56791e-06	7.58684e-06	4.87105e-06
P14604	7.77866e-06	8.49556e-06	9.92623e-06	8.23697e-06	8.01692e-06	5.94075e-06	8.23271e-06	7.87117e-06	5.0625e-06	8.71455e-06	8.67984e-06	8.20631e-06
B0BN63	8.21159e-06	9.95577e-06	6.0805e-06	9.21788e-06	9.47176e-06	3.36938e-06	1.02592e-05	7.43774e-06	7.26773e-06	1.04114e-05	8.53395e-06	4.80077e-06
Q6URK4-2	1.7836e-05	2.20693e-05	1.69825e-05	1.89649e-05	1.90852e-05	1.65943e-05	2.44776e-05	1.50527e-05	1.90844e-05	2.46355e-05	1.78364e-05	1.4572e-05
Q5XIN6	1.39171e-05	1.45674e-05	1.41007e-05	1.00903e-05	1.30122e-05	1.04038e-05	1.26236e-05	1.50488e-05	1.26441e-05	9.52868e-06	1.47364e-05	7.72816e-06
P62890	5.60695e-06	6.79182e-06	6.27217e-06	3.50103e-06	3.26634e-06	2.80483e-06	6.01587e-06	6.22179e-06	2.7908e-06	3.45076e-06	2.30987e-06	3.8159e-06
G3V945	1.74037e-05	2.2887e-05	1.28061e-05	1.54031e-05	1.78708e-05	1.36419e-05	1.70125e-05	1.18123e-05	1.79005e-05	2.75985e-05	1.71234e-05	1.25495e-05
Q60587	8.63889e-06	9.73764e-06	8.76012e-06	7.09426e-06	8.79237e-06	3.74699e-06	6.43192e-06	8.49215e-06	3.82235e-06	8.16346e-06	7.34412e-06	2.62348e-06
P04692-5	2.76809e-05	2.85178e-05	1.55007e-05	2.65595e-05	3.01317e-05	2.3365e-05	2.90041e-05	3.06581e-05	2.80108e-05	3.08677e-05	3.232e-05	1.66208e-05
P12839	5.06145e-05	5.22387e-05	7.41946e-05	7.18164e-05	5.05406e-05	5.87434e-05	8.75099e-05	3.32748e-05	9.35382e-05	9.02218e-05	3.99467e-05	4.59666e-05
P07895	2.35307e-05	3.85962e-05	2.42695e-05	2.22815e-05	4.2093e-05	2.57965e-05	3.70959e-05	3.52995e-05	2.78573e-05	4.15652e-05	3.55998e-05	1.53881e-05
Q5RJN0	8.57917e-06	1.2515e-05	1.01384e-05	8.84029e-06	1.09132e-05	8.97352e-06	1.08603e-05	9.63958e-06	9.24177e-06	1.33462e-05	1.19929e-05	8.19242e-06
P24368	9.70621e-06	1.17948e-05	2.76169e-05	1.02528e-05	1.07539e-05	4.59645e-06	1.18944e-05	9.6721e-06	1.07008e-05	1.12659e-05	1.00153e-05	1.76141e-05
Q5FVG4	3.67873e-05	4.01642e-05	2.95223e-05	3.64025e-05	4.52064e-05	3.12251e-05	3.86093e-05	4.52281e-05	3.56332e-05	3.76945e-05	4.65242e-05	3.29596e-05
P63025	9.46252e-05	0.000133904	8.72148e-05	0.000111133	8.95949e-05	2.57002e-05	0.000115786	4.02034e-05	7.58175e-05	0.000103143	9.22421e-05	1.34132e-05
B2RZD6	6.93026e-05	5.48173e-05	5.919e-05	5.30799e-05	6.65987e-05	3.26529e-05	5.97221e-05	6.20242e-05	4.95734e-05	8.20092e-05	4.89554e-05	3.76072e-05
P61227	6.10188e-06	8.07351e-06	5.89452e-06	9.0228e-06	6.15612e-06	3.13338e-06	9.46027e-06	7.69932e-06	7.69686e-06	7.46473e-06	8.35026e-06	4.02482e-06
Q9WU82	8.67521e-06	9.83762e-06	7.45615e-06	7.30477e-06	8.97297e-06	5.92132e-06	9.08733e-06	7.80936e-06	6.30406e-06	7.76498e-06	9.18875e-06	5.58339e-06
D4A0I5	8.16544e-06	9.81846e-06	1.63082e-05	7.84623e-06	8.76874e-06	7.18362e-06	9.57329e-06	7.61381e-06	1.30816e-05	9.71488e-06	8.74777e-06	7.38662e-06
P38718-2	3.67088e-06	3.79159e-06	2.13019e-06	3.67035e-06	2.77401e-06	3.3809e-06	3.01632e-06	3.31784e-06	2.21308e-06	3.78816e-06	2.37949e-06	3.14891e-06
P07483	3.55047e-06	4.29077e-06	6.90193e-06	3.14345e-06	3.31154e-06	3.68371e-06	4.37785e-06	4.20539e-06	5.24767e-06	6.08005e-06	4.08756e-06	1.91383e-06
P21708	2.23302e-05	2.73614e-05	1.75251e-05	2.53072e-05	1.74886e-05	1.67531e-05	1.75606e-05	1.76003e-05	1.70705e-05	1.58517e-05	2.92977e-05	1.38771e-05
B0K031	5.47002e-06	5.98863e-06	6.87926e-06	5.38096e-06	5.26891e-06	4.41117e-06	6.13908e-06	7.6774e-06	3.74516e-06	5.49467e-06	6.52779e-06	6.01188e-06
Q63622	1.17172e-05	1.15642e-05	1.26468e-05	1.44769e-05	1.21846e-05	8.24128e-06	1.2509e-05	8.94556e-06	7.31505e-06	1.35487e-05	1.14682e-05	7.13442e-06
G3V741	5.44377e-05	5.59619e-05	9.26447e-05	9.65558e-05	4.08697e-05	8.86505e-05	0.000100834	5.39536e-05	9.36346e-05	6.14033e-05	0.000123701	8.30667e-05
F1LPS8	1.84704e-05	1.94301e-05	1.63692e-05	1.84493e-05	1.95185e-05	1.1539e-05	1.83464e-05	1.93406e-05	1.58734e-05	2.06664e-05	1.87329e-05	9.27434e-06
P17764	2.21193e-05	3.21441e-05	2.87622e-05	2.65888e-05	2.41214e-05	1.8803e-05	2.73264e-05	2.10152e-05	2.01739e-05	2.50222e-05	2.99791e-05	1.3568e-05
F1M013	8.39922e-06	1.28456e-05	1.05928e-05	7.75698e-06	9.05423e-06	4.4696e-06	9.80764e-06	9.41691e-06	4.49585e-06	6.59283e-06	5.28654e-06	7.38168e-06
P62919	8.64031e-06	1.21833e-05	7.02483e-06	7.40331e-06	8.06972e-06	9.6785e-06	8.77447e-06	8.23721e-06	3.56993e-06	7.01144e-06	1.07202e-05	9.03715e-06
Q5PPJ9	7.03103e-06	5.98786e-06	5.21328e-06	8.6818e-06	7.9189e-06	4.67699e-06	6.21274e-06	5.54568e-06	5.59156e-06	6.52244e-06	7.93563e-06	3.35213e-06
O35567	5.01709e-06	5.7004e-06	6.06884e-06	3.85408e-06	4.07479e-06	3.49314e-06	5.34166e-06	4.46551e-06	6.52018e-06	4.96834e-06	5.38191e-06	4.01981e-06
F1M978	7.1425e-06	1.05178e-05	1.12461e-05	1.04175e-05	9.31119e-06	8.85747e-06	1.09143e-05	7.20519e-06	1.18161e-05	1.03497e-05	8.59527e-06	9.06603e-06
F1LMH0	9.67866e-06	1.3502e-05	1.36114e-05	9.0205e-06	1.37693e-05	1.14506e-05	1.09097e-05	1.15999e-05	1.30725e-05	1.04125e-05	1.56543e-05	8.58438e-06
D3ZWE0	6.08619e-08	9.83232e-05	0.000142953	0.000101686	0.000213652	6.78229e-05	0.000109984	8.87018e-05	0.000106887	0.000102658	0.00018537	2.69996e-06
P12346	7.27706e-06	1.11066e-05	7.76479e-06	7.80479e-06	6.95028e-06	5.41789e-06	9.75976e-06	1.79893e-05	2.83498e-05	1.38341e-05	8.74696e-06	4.3697e-06
P04692	2.76809e-05	2.85178e-05	1.55007e-05	2.65595e-05	3.01317e-05	2.22064e-05	2.83972e-05	3.06581e-05	2.80108e-05	2.96943e-05	3.232e-05	1.53987e-05
F1M953	2.29753e-05	2.60398e-05	2.17253e-05	2.24075e-05	2.532e-05	1.61174e-05	2.52835e-05	2.14908e-05	2.14213e-05	2.59799e-05	2.33104e-05	1.64771e-05
P62828	1.87368e-05	2.24607e-05	3.35655e-05	2.06305e-05	2.22313e-05	1.7607e-05	3.2733e-05	1.98161e-05	1.8666e-05	3.40598e-05	1.71028e-05	1.80205e-05
D3ZHX3	5.20967e-06	7.53311e-06	7.5335e-06	6.30761e-06	6.42234e-06	4.66587e-06	6.23422e-06	5.93478e-06	7.5095e-06	6.84637e-06	6.48579e-06	3.16396e-06
B5DEN5	1.15785e-05	1.22908e-05	1.5824e-05	1.11628e-05	1.19049e-05	7.84844e-06	1.2874e-05	1.21316e-05	1.12109e-05	1.31222e-05	9.24473e-06	8.99041e-06
Q9Z270	1.18385e-05	1.29472e-05	1.08438e-05	1.05769e-05	1.40181e-05	7.13759e-06	1.50218e-05	1.16658e-05	1.1331e-05	1.42556e-05	1.63793e-05	5.8324e-06
D4A4T9	2.99872e-06	4.74753e-06	3.12338e-06	5.47192e-06	4.4472e-06	2.27432e-06	4.67847e-06	3.95527e-06	2.49704e-06	5.0173e-06	7.10392e-06	2.40794e-06
Q6DGG0	7.48209e-06	9.03273e-06	8.16256e-06	8.27315e-06	8.74166e-06	6.54619e-06	9.28788e-06	8.14864e-06	9.80797e-06	9.0854e-06	8.55431e-06	6.562e-06
F1LMH3	6.64177e-05	8.04735e-05	4.00073e-05	9.08398e-05	5.52417e-05	3.15605e-05	7.32759e-05	5.79942e-05	6.32111e-05	7.04368e-05	7.67743e-05	5.04463e-05
B0K010	3.16271e-06	3.64361e-06	3.60338e-06	4.36767e-06	3.74977e-06	2.69652e-06	4.93376e-06	1.43279e-06	3.06239e-06	4.02963e-06	3.17853e-06	2.0319e-06
Q6PCU8	9.16861e-06	9.2722e-06	1.15871e-05	9.60303e-06	9.14144e-06	1.10683e-05	9.71415e-06	8.83279e-06	7.7409e-06	9.13302e-06	9.57393e-06	7.43853e-06
Q5U316	1.44596e-05	6.77847e-05	6.01579e-05	5.40936e-05	2.00913e-05	3.24184e-06	5.71107e-05	4.26598e-05	5.01013e-05	5.38155e-05	5.52322e-05	2.90038e-05
G3V6H0	1.85235e-05	7.09734e-05	6.37732e-05	5.79705e-05	2.37755e-05	5.84078e-06	6.05594e-05	4.94502e-05	5.36101e-05	5.68242e-05	5.85712e-05	3.02776e-05
Q76EQ0	1.38678e-06	2.31507e-06	3.0598e-06	2.71528e-06	3.00845e-06	2.59819e-06	2.53037e-06	2.84512e-06	3.19888e-06	2.84428e-06	1.95569e-06	2.88037e-06
F1LRT9	1.14656e-05	1.30269e-05	1.49687e-05	2.66654e-05	2.8112e-05	1.33149e-05	1.24169e-05	2.9286e-05	1.26697e-05	1.31525e-05	3.77199e-05	8.91328e-06
B0BNJ1	4.63657e-06	5.42891e-06	5.766e-06	5.25012e-06	3.02353e-06	4.38014e-06	2.95013e-06	4.41773e-06	4.91419e-06	2.44349e-11	5.18593e-06	3.65849e-06
P11505-2	3.74392e-05	3.81388e-05	2.9786e-05	3.90134e-05	3.62649e-05	3.32286e-05	3.47399e-05	3.17626e-05	4.01595e-05	3.89578e-05	5.00033e-05	2.95548e-05
P19627	7.98575e-06	7.13114e-06	5.60533e-06	9.04971e-06	7.08435e-06	6.52367e-06	8.03137e-06	6.55866e-06	7.0552e-06	8.36719e-06	8.73661e-06	5.19838e-06
D3ZTB5	4.3296e-06	5.11299e-06	5.49576e-06	4.94963e-06	4.95594e-06	3.06008e-06	5.2745e-06	3.31566e-06	3.44014e-06	5.72941e-06	5.96509e-06	2.94695e-06
O08838	2.27623e-05	2.35153e-05	1.72851e-05	2.28272e-05	2.70826e-05	2.21711e-05	2.23742e-05	1.98309e-05	2.04029e-05	2.64331e-05	2.37022e-05	1.76469e-05
P24049	5.69595e-06	8.57698e-06	4.52014e-06	6.69299e-06	1.07794e-05	4.81528e-06	3.92878e-06	2.98533e-06	8.30168e-06	4.75559e-06	1.03526e-06	3.70745e-06
P67874	3.77364e-06	6.16122e-06	4.45751e-06	4.31481e-06	6.29519e-06	1.7379e-06	6.5672e-06	4.68719e-06	5.00293e-06	6.43978e-06	5.10347e-06	1.16238e-06
P62282	4.93692e-06	5.67788e-06	7.06084e-06	4.41991e-06	6.6199e-06	4.5817e-06	5.28831e-06	7.96238e-06	3.12491e-06	4.41864e-06	7.62934e-06	3.25186e-06
P60901	6.17404e-06	6.08002e-06	7.40944e-06	7.12384e-06	6.49374e-06	6.90964e-06	7.06263e-06	5.03989e-06	8.24404e-06	6.67137e-06	6.31304e-06	8.08349e-06
P62483	1.09647e-05	1.14786e-05	1.06031e-05	1.0182e-05	9.70749e-06	8.2106e-06	1.03145e-05	8.57438e-06	8.6492e-06	1.11573e-05	1.07021e-05	8.11635e-06
D3ZRN3	0.000296919	0.000861247	0.00136652	0.000670706	0.00073015	0.000373065	0.000641815	0.000304391	0.00123986	0.000816714	0.000625807	0.000258431
P55051	1.71553e-05	2.5315e-05	2.11874e-05	2.07219e-05	1.95373e-05	2.09634e-05	2.17229e-05	1.73913e-05	2.10208e-05	1.86282e-05	2.68877e-05	1.83933e-05
P23358	8.38482e-06	9.20995e-06	1.10379e-05	7.91645e-06	9.10402e-06	3.35956e-06	9.64864e-06	8.61161e-06	6.91914e-06	9.76877e-06	8.45557e-06	5.39058e-06
F1LNY3	3.88395e-05	4.3913e-05	4.45565e-05	4.65319e-05	4.29241e-05	3.33953e-05	4.77532e-05	4.52485e-05	5.16887e-05	4.58498e-05	4.92142e-05	3.36862e-05
Q920Q0	8.95525e-06	5.55318e-06	1.1599e-05	9.1458e-06	1.03393e-05	7.80492e-06	6.09573e-06	6.20961e-06	7.94624e-06	1.11688e-05	9.23751e-06	5.80076e-06
P19945	1.18855e-05	1.0961e-05	1.15201e-05	1.17783e-05	1.34252e-05	1.10054e-05	1.0357e-05	1.03086e-05	1.10372e-05	1.20841e-05	9.94945e-06	7.77211e-06
O35264	1.49965e-05	1.53984e-05	1.67941e-05	1.4159e-05	1.38523e-05	5.31662e-06	1.47934e-05	1.34063e-05	1.69216e-05	1.60467e-05	1.12956e-05	1.20883e-05
F1LY09	1.09761e-05	1.67662e-05	1.26172e-05	1.43144e-05	9.94255e-06	1.2397e-05	1.17399e-05	1.02993e-05	1.09902e-05	1.01684e-05	1.42778e-05	9.67472e-06
Q3MHS9	1.31986e-05	2.33304e-05	1.07491e-05	2.00426e-05	2.47947e-05	1.00601e-05	2.3071e-05	1.31607e-05	1.20673e-05	1.49215e-05	1.59045e-05	1.12124e-05
P15087	7.45567e-06	8.22893e-06	6.76278e-06	7.37312e-06	9.3469e-06	7.20831e-06	9.0223e-06	1.03205e-05	5.13483e-06	7.83707e-06	1.03851e-05	6.15426e-06
P62083	7.6108e-06	8.70576e-06	7.05592e-06	3.74949e-06	7.94079e-06	7.57404e-06	8.4735e-06	7.15313e-06	5.46935e-06	7.55548e-06	7.64382e-06	5.29317e-06
Q9WUH4	1.29883e-06	1.5938e-06	1.56804e-06	1.3648e-06	1.3287e-06	1.50069e-06	1.47038e-06	2.4986e-06	1.70557e-06	1.5562e-06	1.28837e-06	1.97849e-06
P13832	5.10351e-06	7.17585e-06	8.98615e-06	7.4159e-06	7.30615e-06	6.51421e-06	7.98603e-06	6.66364e-06	8.77426e-06	8.368e-06	7.95196e-06	7.26751e-06
P18666	6.48979e-06	7.4656e-06	8.98615e-06	6.76485e-06	7.79251e-06	6.89055e-06	7.98603e-06	6.66364e-06	8.77426e-06	8.8157e-06	7.95196e-06	7.26751e-06
P55161	9.98794e-06	9.96715e-06	9.90438e-06	1.16037e-05	9.79239e-06	8.01978e-06	1.02463e-05	1.44327e-05	9.52659e-06	1.0798e-05	1.28991e-05	5.94672e-06
D3ZAI6	7.60205e-06	9.42606e-06	6.47659e-06	7.6314e-06	7.48296e-06	4.18148e-06	7.4992e-06	7.33617e-06	4.84684e-06	4.44042e-06	9.49019e-06	4.18559e-06
Q6AY56	0.0007976	0.00120823	0.00130748	0.00147004	0.00150382	0.000395251	0.0011382	0.000947228	0.00129822	0.00144203	0.00150041	0.000343308
D3ZYH3	2.27435e-06	1.4632e-06	1.72561e-06	2.22171e-06	3.13789e-07	9.06963e-07	6.54382e-07	8.41126e-07	4.56733e-07	5.46941e-07	1.00203e-06	2.13092e-06
P29418	1.85835e-05	2.22652e-05	2.00745e-05	1.87462e-05	1.61351e-05	3.16415e-11	2.31934e-05	1.12497e-05	1.96333e-05	2.47809e-05	2.28362e-05	2.07981e-05
P62198	3.15204e-06	3.55325e-06	3.10493e-06	3.8361e-06	3.00485e-06	1.87983e-06	5.42609e-06	3.10648e-06	2.87243e-06	3.69074e-06	3.90276e-06	2.72101e-06
M0R5T4	3.1025e-05	3.07196e-05	3.81283e-05	4.26715e-05	2.56449e-05	2.35007e-05	3.57839e-05	4.28611e-05	3.92012e-05	4.86411e-05	5.62331e-05	2.71233e-05
D3ZCV0	7.899e-06	9.89318e-06	8.60029e-06	9.82092e-06	8.84808e-06	8.63407e-06	1.03081e-05	8.48313e-06	7.83332e-06	9.66778e-06	7.88546e-06	7.93918e-06
Q64559-1	2.52265e-05	2.56974e-05	2.77071e-05	2.4078e-05	2.55465e-05	1.73807e-05	2.47318e-05	2.10094e-05	2.26665e-05	2.52259e-05	2.07693e-05	1.81566e-05
Q04970	2.8349e-06	7.6037e-06	5.77765e-06	6.31418e-06	6.96147e-06	6.4266e-06	4.67379e-06	7.76531e-06	4.82409e-06	9.72268e-06	6.88106e-06	4.5978e-06
G3V7G0	2.68272e-06	4.53315e-06	5.1593e-06	3.81312e-06	4.8885e-06	2.48875e-06	4.46303e-06	3.53919e-06	4.40559e-06	5.00406e-06	2.24835e-06	2.55926e-06
Q63941	4.7435e-05	0.000107363	9.02627e-05	8.34427e-05	5.71596e-05	1.69741e-05	9.08913e-05	7.83098e-05	7.44832e-05	9.08876e-05	9.03216e-05	3.77137e-05
Q641Y2	1.17414e-05	1.93021e-05	1.58417e-05	1.49639e-05	1.60662e-05	9.97391e-06	1.68145e-05	1.28047e-05	1.61622e-05	1.76659e-05	1.7106e-05	1.36953e-05
P10760	9.41404e-06	9.96183e-06	7.95193e-06	9.44496e-06	9.28414e-06	9.37988e-06	1.0085e-05	9.29391e-06	9.90564e-06	9.37133e-06	1.04324e-05	8.59855e-06
O88768	8.07504e-06	6.93924e-06	6.40886e-06	7.76442e-06	7.78104e-06	4.33456e-06	5.68707e-06	3.53274e-06	6.45058e-06	6.97001e-06	7.69046e-06	3.09501e-06
F1LUV9	3.88395e-05	4.3913e-05	4.052e-05	4.65319e-05	4.29241e-05	3.10361e-05	4.77532e-05	4.52485e-05	4.84651e-05	4.58498e-05	4.92142e-05	3.09957e-05
F1M5N4	4.42221e-06	1.05601e-05	1.17566e-05	1.01432e-05	7.9625e-06	7.46034e-06	7.48686e-06	6.84355e-06	8.02793e-06	8.03002e-06	5.07318e-06	6.85046e-06
P62246	1.88934e-06	2.34287e-06	4.81261e-06	3.99642e-06	2.48429e-06	3.48064e-06	2.65822e-06	2.26825e-06	4.53644e-06	2.25395e-06	2.75533e-06	1.364e-07
D4A3V2	8.99324e-06	1.04768e-05	8.37973e-06	8.42682e-06	1.06045e-05	5.9146e-06	9.63413e-06	7.89623e-06	7.1971e-06	9.86401e-06	9.68447e-06	6.42276e-06
Q63768-2	5.12564e-06	4.13763e-06	5.25132e-06	4.04168e-06	4.25235e-06	1.40953e-06	3.77168e-06	3.04942e-06	2.43764e-06	3.65347e-06	4.06059e-06	2.34898e-06
P51146	2.07987e-05	0.000162506	4.86795e-05	0.000122808	1.21812e-05	2.44169e-07	0.000125849	0.000110728	5.76436e-05	0.00012273	0.000136244	4.0359e-05
G3V774	8.05822e-06	3.24315e-06	8.61351e-06	9.21118e-06	7.14479e-06	3.60135e-06	8.33299e-06	2.07096e-06	8.79163e-06	9.03514e-06	7.49527e-06	2.57222e-06
Q4FZT2	2.44671e-05	4.61265e-06	5.97996e-06	3.83889e-06	3.35872e-06	2.65085e-06	4.77037e-06	3.34642e-06	6.24713e-06	4.28348e-06	3.04654e-06	4.04685e-06
F1LQD2	2.45131e-06	3.73522e-06	2.19655e-06	2.36558e-06	2.51043e-06	1.54537e-06	2.70235e-06	2.15407e-06	1.46116e-06	2.34518e-06	3.14486e-06	1.70881e-06
P15205	3.81341e-05	3.80363e-05	3.93487e-05	3.76773e-05	3.55539e-05	2.14909e-05	4.02421e-05	3.06624e-05	3.69798e-05	3.84446e-05	3.62858e-05	2.52814e-05
P18437	3.58715e-06	2.73259e-06	3.40705e-06	3.61033e-06	3.22918e-06	3.85222e-06	3.35296e-06	1.30209e-06	1.13145e-06	3.0354e-06	2.68976e-06	3.56836e-06
Q4FZT8	1.31826e-10	1.27278e-06	8.25496e-07	5.40446e-12	7.79951e-07	8.97478e-07	7.90393e-12	8.77794e-11	1.13883e-06	1.72556e-10	2.91102e-10	5.95755e-07
P24329	7.345e-06	1.24856e-05	1.38906e-05	1.17659e-05	6.65675e-05	5.78618e-06	1.35562e-05	5.53731e-06	5.5458e-06	1.2896e-05	1.54229e-05	6.39646e-06
P11507-2	1.92149e-05	2.08866e-05	1.88033e-05	2.56673e-05	2.57983e-05	2.76639e-05	2.66197e-05	1.87302e-05	1.7956e-05	3.0143e-05	3.04966e-05	1.88999e-05
P17077	4.45696e-06	3.67918e-06	4.51066e-06	3.11403e-06	4.38977e-06	3.60535e-06	4.28087e-06	3.94971e-06	3.82095e-06	4.35137e-06	4.58641e-06	4.69814e-06
G3V9N8	3.40179e-05	3.1723e-05	3.55951e-05	3.42104e-05	3.333e-05	2.40281e-05	3.1352e-05	2.51342e-05	2.80611e-05	3.71645e-05	3.26181e-05	2.34926e-05
D4A435	1.75405e-05	2.35198e-05	1.62e-05	2.01043e-05	1.89273e-05	9.62582e-06	2.06448e-05	1.54301e-05	1.52966e-05	1.81864e-05	2.33445e-05	1.12195e-05
B2GV06	2.00378e-05	1.60109e-05	1.95947e-05	1.19464e-05	1.70273e-05	1.69781e-05	1.60254e-05	1.34274e-05	1.83456e-05	1.85164e-05	1.47325e-05	1.49828e-05
Q794F9	1.98178e-05	1.67842e-05	2.06411e-05	2.16879e-05	2.07731e-05	1.01258e-05	1.99127e-05	1.97515e-05	1.93694e-05	1.73179e-05	2.7293e-05	8.67741e-06
Q5EB77	4.75874e-06	3.28273e-06	4.71005e-06	4.9016e-06	4.48028e-06	3.32442e-06	5.14126e-06	5.58523e-06	4.54591e-06	6.65561e-06	6.19887e-06	3.44396e-06
P11506-8	3.355e-05	3.373e-05	2.61004e-05	3.52852e-05	3.29659e-05	3.32286e-05	2.86251e-05	2.73406e-05	3.82913e-05	3.20998e-05	5.20769e-05	2.95548e-05
P97532	3.97304e-06	4.29195e-06	4.31104e-06	3.83357e-06	3.63687e-06	3.39361e-06	3.66913e-06	2.81967e-06	3.83645e-06	3.48704e-06	3.32202e-06	2.51264e-06
Q6P3V8	1.30389e-05	1.57168e-05	1.48607e-05	1.28238e-05	1.29686e-05	8.87269e-06	1.34526e-05	1.30118e-05	1.32113e-05	1.43965e-05	1.48278e-05	1.20574e-05
Q64428	7.59179e-06	9.66766e-06	9.81474e-06	8.44171e-06	7.24236e-06	5.40268e-06	7.41402e-06	5.93393e-06	4.18783e-06	4.71825e-06	8.24089e-06	5.49407e-06
Q01986	2.11516e-05	2.38478e-05	1.98385e-05	2.31001e-05	2.25453e-05	1.97321e-05	2.46128e-05	1.97917e-05	2.31829e-05	2.38068e-05	1.86944e-05	1.82769e-05
P04692-6	2.76809e-05	2.85178e-05	1.55007e-05	2.65595e-05	3.01317e-05	2.22064e-05	2.83972e-05	3.06581e-05	2.80108e-05	2.96943e-05	3.232e-05	1.53987e-05
P08050	1.92333e-05	2.64003e-05	2.30033e-05	2.21956e-05	1.98345e-05	1.38648e-05	1.6542e-05	1.68917e-05	1.75704e-05	1.88312e-05	2.24264e-05	1.11135e-05
Q7TPB1	1.26029e-05	1.47621e-05	1.5814e-05	1.28221e-05	1.47864e-05	1.05213e-05	1.35694e-05	1.44512e-05	1.51594e-05	1.43162e-05	1.55142e-05	6.09404e-06
D3ZHY9	4.81422e-06	3.11432e-06	2.99346e-06	3.9602e-06	4.00179e-06	2.30907e-06	3.5422e-06	3.60934e-06	2.95906e-06	3.04067e-06	4.84386e-06	3.20497e-06
Q6P3V9	8.44829e-06	1.10926e-05	1.20084e-05	9.78003e-06	9.95662e-06	7.55251e-06	9.8492e-06	6.91202e-06	5.95229e-06	8.98206e-06	7.44549e-06	7.71754e-06
Q1RP74	3.70388e-06	3.73677e-06	5.00712e-06	4.10571e-06	2.5517e-05	1.91495e-06	3.16641e-06	1.1496e-06	6.79675e-06	2.72511e-06	2.15059e-06	3.19289e-06
D4A4Q4	1.50957e-06	1.27533e-06	1.20609e-06	1.53772e-06	1.32651e-06	8.24635e-07	1.45321e-06	1.76767e-06	1.18917e-06	1.55854e-06	2.13802e-06	6.91601e-12
Q3B7V5	1.12371e-05	1.58807e-05	1.06601e-05	1.22659e-05	1.27697e-05	8.06817e-06	1.38073e-05	1.29832e-05	8.94979e-06	7.7518e-06	1.75532e-05	2.72515e-06
Q792I0	3.76096e-06	6.40415e-06	7.42518e-06	8.75088e-06	6.17763e-06	1.01032e-05	6.74097e-06	7.37045e-06	9.24362e-06	6.74589e-06	6.84313e-06	7.44319e-06
P63088	1.90223e-05	2.48862e-05	1.85764e-05	1.88835e-05	1.82045e-05	1.525e-05	2.07241e-05	1.71683e-05	1.33733e-05	2.08015e-05	1.79464e-05	1.84724e-05
P38650	1.14656e-05	1.30269e-05	1.49687e-05	2.66654e-05	2.8112e-05	1.33149e-05	1.24169e-05	2.9286e-05	1.26697e-05	1.31525e-05	3.77199e-05	8.91328e-06
P17220	3.95478e-06	3.99927e-06	4.93056e-06	4.02635e-06	4.04196e-06	1.8663e-06	4.08595e-06	3.45346e-06	3.44447e-06	4.00482e-06	3.26792e-06	3.13852e-06
P63055	7.79781e-07	7.48484e-06	6.58093e-06	1.66133e-06	1.09822e-05	1.07457e-05	1.80779e-06	1.06399e-10	9.88173e-13	1.25804e-05	2.60938e-10	1.10933e-05
D3ZBU7	5.94814e-06	5.21152e-06	5.91253e-06	6.32728e-06	4.79189e-06	5.39007e-06	6.64016e-06	4.12035e-06	3.63067e-06	6.09248e-06	5.36963e-06	4.8792e-06
Q63965	1.8236e-05	1.76073e-05	1.83813e-05	1.63449e-05	1.91838e-05	1.39133e-05	1.67927e-05	1.84811e-05	1.55509e-05	1.5242e-05	1.87998e-05	1.01339e-05
D3ZE63	6.41272e-05	0.000145103	7.01007e-05	8.06012e-05	7.92363e-05	4.39399e-06	4.44643e-05	6.30559e-05	7.6129e-05	7.90569e-05	6.69061e-05	4.34236e-06
Z4YNG7	1.2856e-05	1.02436e-05	9.02272e-06	1.29809e-05	9.55752e-06	5.79547e-06	1.27956e-05	8.70336e-06	6.94314e-06	1.4083e-05	1.14364e-05	7.04023e-06
P47858	3.26321e-05	3.71891e-05	3.60045e-05	3.26905e-05	3.48763e-05	2.49799e-05	3.32651e-05	3.22784e-05	3.10693e-05	3.09033e-05	3.5918e-05	2.40228e-05
G3V9G4	7.13341e-06	7.48404e-06	6.57109e-06	6.04622e-06	7.65837e-06	4.15353e-06	7.76546e-06	8.70529e-06	6.43101e-06	6.64747e-06	6.73504e-06	4.84055e-06
M0R7G4	1.90027e-05	1.55306e-05	1.01217e-05	1.98805e-05	4.89019e-06	1.07649e-10	1.46871e-05	1.0361e-05	3.58102e-06	2.15727e-05	1.47089e-05	2.99392e-06
P21531	5.94209e-06	5.50327e-06	4.67572e-06	4.7759e-06	4.72346e-06	6.10738e-06	5.6591e-06	4.35206e-06	7.19499e-06	6.45798e-06	4.28843e-06	4.52952e-06
P35465	5.09872e-06	7.39859e-06	5.31738e-06	4.61559e-06	3.90621e-06	4.24282e-06	9.80043e-06	6.07904e-06	6.60931e-06	5.50439e-06	9.0184e-06	6.66819e-06
P36972	1.96241e-06	1.63552e-06	2.15573e-06	2.05279e-06	1.35305e-06	1.66946e-06	2.00678e-06	8.61479e-07	2.70652e-06	1.88725e-06	2.25006e-06	8.38405e-07
Q00729	8.19509e-05	0.000120997	0.000153974	0.000144626	0.000182362	0.000111688	0.000165767	9.0934e-05	0.00016649	0.000152361	0.000113253	8.01293e-05
F1LMV8	4.57087e-06	6.19384e-06	7.54232e-06	5.42029e-06	4.72985e-06	7.23315e-06	8.75755e-06	5.15317e-06	8.93172e-06	4.50029e-06	4.90303e-06	5.83105e-06
D3ZZY4	1.466e-06	2.87011e-10	2.04408e-06	1.83316e-11	1.93136e-10	2.35852e-10	2.72887e-06	2.15615e-10	1.27617e-06	1.95169e-10	1.8238e-10	1.79448e-10
B4F772	2.04721e-05	2.2303e-05	7.23138e-06	2.14571e-05	1.97023e-05	5.86116e-06	2.28029e-05	1.9829e-05	9.36313e-06	8.76259e-06	1.91436e-05	1.38558e-05
G3V7P1	2.63336e-06	1.647e-06	5.99278e-06	2.30589e-06	2.65443e-06	5.15079e-06	6.07555e-06	5.74826e-06	6.13744e-06	5.57361e-06	4.02175e-06	2.93397e-06
D3ZAP9	5.34613e-06	4.49338e-06	2.97941e-06	5.45153e-06	5.52866e-06	4.51656e-06	5.87485e-06	5.72525e-06	6.13164e-06	4.89428e-06	5.69446e-06	2.09658e-06
D3ZX82	1.67388e-05	1.75523e-05	1.78532e-05	1.67028e-05	1.67824e-05	1.32008e-05	1.76197e-05	1.60603e-05	1.5588e-05	1.70085e-05	1.91228e-05	1.01967e-05
P02650	2.20956e-05	2.20391e-05	2.05376e-05	2.32222e-05	2.34074e-05	1.84916e-05	1.91293e-05	2.15012e-05	1.75126e-05	1.92629e-05	3.14795e-05	1.53459e-05
P62332	2.32621e-05	6.80158e-06	3.92026e-06	3.06992e-06	2.42708e-05	6.29067e-06	2.81362e-05	3.17688e-05	3.77515e-06	6.48882e-06	6.38695e-05	4.67787e-06
P14841	3.89736e-06	5.21659e-06	8.50118e-06	5.21195e-06	6.87791e-06	8.98878e-06	4.65755e-06	4.83786e-06	1.36485e-05	8.38649e-06	4.79163e-06	9.22406e-06
F1LLX6	1.84718e-05	1.9031e-05	1.3855e-05	1.7283e-05	1.9145e-05	7.95645e-06	1.69849e-05	9.2323e-06	1.40984e-05	1.92671e-05	1.65405e-05	1.4578e-05
D4A6G6	3.83849e-06	5.6177e-06	6.16512e-06	3.63341e-06	5.52177e-06	7.00818e-06	4.38326e-06	5.54196e-06	2.48363e-06	4.92499e-06	5.50631e-06	6.68917e-06
P61354	5.8757e-06	7.38079e-06	9.11177e-06	5.55886e-06	7.48199e-06	4.28619e-06	6.26157e-06	4.55543e-06	3.60533e-06	5.66207e-06	3.87109e-06	5.75939e-06
F1M9V2	3.16767e-05	7.24546e-06	3.41414e-05	2.56299e-10	5.45548e-05	3.09352e-05	5.26542e-06	2.05387e-05	2.84832e-05	2.46543e-05	1.51558e-05	1.44901e-10
Q62717	1.84718e-05	1.9031e-05	1.37695e-05	1.7283e-05	1.9145e-05	7.95645e-06	1.69849e-05	8.54462e-06	1.40984e-05	1.92671e-05	1.65405e-05	1.4578e-05
M0R9U5	3.21768e-06	3.52662e-06	2.9789e-06	2.07858e-06	2.31368e-06	3.572e-06	5.22749e-06	1.88502e-06	4.28015e-06	5.25458e-06	2.19036e-06	3.00591e-06
F8WFH8	2.17579e-06	3.14662e-06	4.44411e-06	2.87338e-06	3.67873e-06	2.7141e-06	4.15424e-06	3.0121e-06	2.69944e-06	6.70541e-06	4.08584e-06	1.05044e-06
Q6PST4	7.06325e-06	6.56296e-06	8.09385e-06	2.87927e-05	8.09962e-06	5.03442e-06	6.02767e-06	5.11957e-06	5.91326e-06	5.90941e-06	4.33614e-06	4.97666e-06
P19139	6.99492e-06	1.07613e-05	5.74128e-06	7.5603e-06	1.12313e-05	4.73214e-06	1.08449e-05	9.56746e-06	7.89322e-06	1.02623e-05	1.1327e-05	2.7178e-06
G3V8L3	4.03599e-06	3.00763e-06	3.43947e-06	3.398e-06	3.45655e-06	2.70087e-06	4.69124e-06	2.30683e-06	3.93273e-06	5.169e-06	3.52036e-06	3.41781e-06
P11884	7.37736e-06	7.46858e-06	6.93043e-06	6.47284e-06	6.18245e-06	3.5791e-06	5.89845e-06	5.94033e-06	5.22331e-06	6.04563e-06	7.42977e-06	5.1203e-06
P62278	4.00304e-06	5.39112e-06	5.6831e-06	4.74876e-06	5.12905e-06	3.80809e-06	6.2749e-06	5.72792e-06	3.56015e-06	4.35633e-06	4.34749e-06	3.86966e-06
G3V9Y1	1.20426e-05	1.09669e-05	1.00355e-05	1.24849e-05	1.01234e-05	9.01573e-06	9.53049e-06	9.02298e-06	9.29537e-06	1.4453e-05	8.91846e-06	8.20909e-06
Q9ERH3	7.25199e-06	1.04133e-05	9.72539e-06	9.53773e-06	9.67836e-06	5.28398e-06	9.24586e-06	9.35376e-06	7.68759e-06	9.25435e-06	9.95041e-06	5.79868e-06
Q6P2A5	2.11191e-06	3.29537e-06	2.61116e-06	2.23142e-06	2.60024e-06	2.4698e-06	2.26503e-06	1.57155e-06	1.7768e-06	3.1636e-06	1.42423e-06	2.35008e-06
D3Z9H2	5.53535e-06	8.54367e-06	6.40826e-06	5.13253e-06	5.94808e-06	2.53101e-06	6.77909e-06	5.02405e-06	5.14005e-06	7.11385e-06	8.1994e-06	2.45444e-06
D3Z8H0	1.19795e-06	6.87735e-07	2.21712e-06	9.24188e-07	2.17434e-06	6.83293e-07	1.82872e-06	3.71761e-07	1.70694e-06	1.49563e-06	1.47953e-06	1.29094e-06
P61314	7.07888e-06	6.61098e-06	6.13752e-06	6.67512e-06	7.26042e-06	4.7647e-06	7.2853e-06	6.52474e-06	6.03075e-06	7.24698e-06	7.84668e-06	7.15267e-06
Q6AYD3	4.00463e-06	4.0235e-06	4.66101e-06	3.6804e-06	3.62549e-06	2.36757e-06	4.50379e-06	3.29363e-06	3.4286e-06	5.15198e-06	2.82887e-06	3.58131e-06
P70600	6.03892e-06	8.1922e-06	5.89566e-06	1.44448e-05	6.07287e-06	4.39259e-06	7.27248e-06	5.42562e-06	4.49555e-06	6.46586e-06	6.54356e-06	4.71562e-06
D4ADE8	9.97355e-07	4.76918e-06	4.03137e-06	3.33983e-06	3.08041e-06	3.98534e-06	2.41676e-06	1.77741e-06	3.07086e-06	2.94611e-06	1.47399e-06	2.5588e-06
D3ZG43	2.23885e-05	2.48963e-05	2.56776e-05	2.13541e-05	2.45662e-05	9.38682e-06	2.2313e-05	2.1929e-05	2.38954e-05	2.21003e-05	1.83704e-05	1.01125e-05
P11505-4	3.74392e-05	3.81388e-05	2.9786e-05	3.90134e-05	3.62649e-05	3.32286e-05	3.47399e-05	3.17626e-05	4.01595e-05	3.89578e-05	5.00033e-05	2.95548e-05
P08644-2	3.38045e-06	6.71997e-06	4.69234e-06	6.31418e-06	6.16998e-06	6.92017e-06	4.22784e-06	6.04245e-06	4.82409e-06	1.09985e-05	5.04341e-06	3.51367e-06
D3ZXS8	2.17262e-06	2.49784e-06	3.3294e-06	3.33594e-06	7.4666e-12	8.83188e-07	3.30483e-06	1.50274e-06	4.10128e-06	2.80645e-06	2.28863e-06	1.07182e-06
Q71UE8	6.39262e-07	2.45881e-06	8.06481e-06	2.47868e-06	6.18625e-06	7.57596e-06	2.31968e-06	1.16841e-05	8.51072e-06	2.66757e-06	4.55662e-06	1.21745e-05
P04182	4.64044e-06	4.08766e-06	5.88315e-06	5.0823e-06	5.81805e-06	3.19964e-06	4.19635e-06	3.49959e-06	4.13565e-06	4.46319e-06	4.89396e-06	2.15542e-06
P53678	3.5479e-06	3.13699e-06	3.67349e-06	3.659e-06	4.05279e-06	1.20841e-06	4.28728e-06	1.96831e-06	1.96435e-06	3.11732e-06	4.89165e-06	1.11841e-06
O55096	3.20938e-06	1.78538e-06	3.78468e-06	2.41773e-06	1.73639e-06	3.12817e-06	3.39766e-06	2.27608e-06	3.25544e-06	1.96304e-06	2.69893e-06	1.54917e-06
Q6AYR2	4.90955e-06	4.85459e-06	5.92565e-06	1.3269e-05	5.59463e-06	5.20306e-06	5.52457e-06	6.82914e-06	4.5948e-06	7.84534e-06	7.05678e-06	5.15178e-06
F1LN88	7.37736e-06	7.46858e-06	5.23163e-06	6.47284e-06	6.18245e-06	3.5791e-06	5.89845e-06	5.94033e-06	5.22331e-06	6.04563e-06	7.42977e-06	5.1203e-06
B0BNK1	1.27731e-05	1.24905e-05	1.50848e-05	1.44909e-05	1.28289e-05	1.06669e-05	1.33718e-05	1.08834e-05	1.18212e-05	1.33692e-05	1.41974e-05	5.12131e-06
G3V8Q6	6.26357e-06	5.56721e-06	6.17625e-06	7.20121e-06	6.51844e-06	7.21148e-06	6.42043e-06	5.0739e-06	6.70683e-06	6.74803e-06	4.68499e-06	4.87729e-06
F1LQJ7	3.51623e-06	3.30592e-06	2.77482e-06	2.43106e-06	3.7184e-06	1.76043e-06	3.01685e-06	3.35746e-06	2.57799e-06	2.58954e-06	3.58941e-06	2.79397e-06
F1LSL1	8.59803e-06	1.01649e-05	1.06715e-05	1.24495e-05	1.03946e-05	1.07565e-05	1.09594e-05	1.2105e-05	7.1585e-06	1.35371e-05	9.80988e-06	9.93086e-06
Q63413	4.36747e-06	3.80398e-06	6.70576e-06	5.53864e-06	5.83067e-06	4.51821e-06	6.03505e-06	6.38534e-06	7.10453e-06	6.02701e-06	5.09492e-06	5.62473e-06
O88377	6.86389e-06	7.12132e-06	7.32122e-06	6.8159e-06	7.01862e-06	4.34525e-06	6.23466e-06	5.91639e-06	6.07382e-06	6.85894e-06	7.74026e-06	4.07257e-06
F1LV13	4.60744e-06	4.39864e-06	5.19985e-06	4.47274e-06	4.19388e-06	2.92405e-06	5.55118e-06	4.75572e-06	4.37172e-06	4.65299e-06	5.69548e-06	3.91887e-06
G3V984	8.03663e-06	1.23875e-05	1.23911e-05	1.0697e-05	1.28607e-05	7.26213e-06	1.15431e-05	1.01048e-05	7.54908e-06	1.01443e-05	1.3482e-05	7.34366e-06
Q9QZ76	8.74801e-11	1.97495e-10	1.66283e-10	2.93212e-10	1.33184e-10	8.51847e-11	2.51625e-10	1.42675e-06	1.75274e-10	1.70095e-10	3.47377e-10	1.92956e-11
E9PTV0	8.52219e-11	2.37832e-06	1.39581e-10	2.96915e-06	1.27429e-06	2.61432e-10	2.32422e-06	3.57329e-06	4.53657e-06	1.77429e-06	2.14217e-06	1.12023e-06
Q01062	1.28997e-05	1.10646e-05	1.09439e-05	8.71581e-06	8.95758e-06	7.0902e-06	1.21433e-05	9.18733e-06	1.59054e-05	1.10885e-05	1.57912e-05	8.07378e-06
P35571	9.86925e-06	1.23015e-05	1.10137e-05	9.27849e-06	1.15143e-05	6.76346e-06	7.24666e-06	1.34462e-05	6.34227e-06	8.507e-06	1.24951e-05	5.2089e-06
Q68FS2	3.78669e-06	3.14923e-06	5.64204e-06	1.88327e-06	3.71349e-06	3.32077e-06	3.62662e-06	4.41015e-06	3.8325e-06	3.98745e-06	2.99812e-06	3.17252e-06
Q6AYS2	1.8236e-05	1.76073e-05	1.83813e-05	1.63449e-05	1.91838e-05	1.39133e-05	1.67927e-05	1.84811e-05	1.55509e-05	1.5242e-05	1.87998e-05	1.01339e-05
P30835	1.7772e-05	1.98916e-05	2.00128e-05	1.84384e-05	1.91036e-05	1.60421e-05	2.01753e-05	1.43749e-05	1.47643e-05	2.02431e-05	2.15998e-05	1.4959e-05
Q5RK08	5.50815e-06	8.78072e-06	8.60918e-06	5.88168e-06	9.69715e-06	7.0756e-06	7.35974e-06	7.39422e-06	8.44282e-06	7.76091e-06	8.48409e-06	6.14075e-06
Q08877-9	4.42665e-05	6.42802e-05	6.24235e-05	5.98984e-05	6.22687e-05	3.06196e-05	6.50792e-05	4.22655e-05	6.19172e-05	6.8519e-05	6.15887e-05	4.88678e-05
O35274	5.68956e-06	6.65553e-06	6.55802e-06	5.18058e-06	6.01922e-06	6.40559e-06	5.94991e-06	4.44782e-06	5.42511e-06	4.92279e-06	6.55351e-06	5.86746e-06
Q8CFD0	1.25779e-05	1.23146e-05	1.41317e-05	1.16229e-05	1.31844e-05	4.84495e-06	1.16311e-05	1.00178e-05	1.17584e-05	1.16489e-05	1.19771e-05	8.6963e-06
G3V7I5	4.41892e-06	5.63186e-06	5.20826e-06	4.76341e-06	4.48885e-06	2.32984e-06	4.25566e-06	3.1656e-06	5.20466e-06	3.94739e-06	5.26502e-06	4.36792e-06
Q920J4	4.62633e-06	5.86885e-06	5.12629e-06	6.0244e-06	5.71853e-06	4.24206e-06	6.05811e-06	3.64365e-06	3.87375e-06	4.8874e-06	4.58798e-06	4.11029e-06
P41498	6.70826e-06	7.13795e-06	7.39966e-06	5.69609e-06	7.58222e-06	6.38992e-07	7.97343e-06	6.89448e-06	8.82445e-06	6.19596e-06	7.7333e-06	2.64413e-06
P32736-2	1.35244e-05	2.26354e-05	1.82864e-05	2.11698e-05	2.44774e-05	1.1858e-05	2.03876e-05	1.36347e-05	2.10279e-05	2.21494e-05	2.8413e-05	9.92207e-06
P19491-2	9.37327e-06	1.13168e-05	1.11861e-05	1.04323e-05	9.17701e-06	8.55135e-06	9.35515e-06	9.07813e-06	1.02071e-05	9.29436e-06	1.19126e-05	8.10444e-06
G3V7Y3	4.33477e-05	6.50149e-05	3.43254e-05	6.03767e-05	6.37004e-05	2.97541e-05	6.51731e-05	6.01988e-05	5.17725e-05	4.91956e-05	6.87171e-05	3.91307e-05
P60522	1.36136e-06	2.01821e-06	2.16069e-06	1.61903e-06	2.20501e-06	2.14321e-06	2.77798e-06	1.35994e-06	1.88469e-06	2.52565e-06	1.30168e-06	1.24884e-06
Q5BJN5	5.69032e-07	1.13007e-06	1.61162e-06	1.91427e-06	2.14796e-06	2.48106e-06	1.11016e-06	1.29085e-10	4.85239e-11	1.64207e-06	1.30432e-06	5.73946e-07
D3ZQG6	3.47402e-06	6.95382e-06	3.86262e-06	5.30244e-06	3.80685e-06	2.49726e-06	5.05538e-06	4.73533e-06	4.86648e-06	4.98677e-06	6.07976e-06	3.43424e-06
D3ZLK9	1.85995e-06	1.80413e-06	1.93026e-06	3.36556e-06	2.09524e-06	1.85049e-06	2.13363e-06	2.1063e-06	2.10901e-06	2.02688e-06	1.90064e-06	1.8104e-06
P05765	4.23056e-06	5.09759e-06	5.1051e-06	5.22612e-06	4.92864e-06	3.75502e-06	7.09013e-06	2.3077e-06	3.94719e-06	6.96536e-06	5.3444e-06	4.56849e-06
M0RBE5	4.49784e-06	3.41372e-06	4.08923e-06	3.94656e-06	1.04357e-10	2.47679e-06	4.61674e-06	3.01044e-10	3.72041e-06	4.65393e-06	5.98531e-06	2.0786e-06
Q6Q0N1	5.91558e-06	8.46931e-06	9.87517e-06	9.04449e-06	8.4098e-06	6.60766e-06	8.68774e-06	6.14877e-06	8.37367e-06	8.3484e-06	8.97862e-06	6.01372e-06
D4A9L0	4.7395e-06	5.21152e-06	4.68852e-06	5.02676e-06	3.18714e-06	5.39007e-06	5.71217e-06	2.98858e-06	7.9863e-06	4.50495e-06	3.31789e-06	6.14595e-06
Q91ZN1	2.32335e-05	2.75596e-05	2.16617e-05	2.4566e-05	2.57446e-05	1.25144e-05	2.6742e-05	2.22637e-05	1.84433e-05	2.63284e-05	3.01299e-05	1.81283e-05
Q5U211	2.36148e-06	3.3463e-06	5.37048e-06	3.13592e-06	2.73952e-06	4.38136e-06	2.72313e-06	1.84756e-06	3.4755e-06	3.5276e-06	2.81202e-06	1.27383e-06
P62912	7.91736e-06	1.2213e-10	1.06815e-05	1.08752e-05	5.90695e-06	6.87074e-06	1.21586e-05	3.25305e-06	6.4657e-06	1.09967e-05	7.08431e-06	9.80536e-06
F1LVR4	4.70872e-06	6.28168e-06	4.73626e-06	6.2412e-06	4.48292e-06	4.18936e-06	5.41219e-06	3.45749e-06	6.93796e-06	5.93139e-06	4.05552e-06	3.41268e-06
Q9QYL8	5.49344e-06	6.09701e-06	6.64786e-06	5.71888e-06	3.89321e-06	4.16807e-06	5.86373e-06	5.22879e-06	5.66007e-06	5.43727e-06	6.12069e-06	5.09887e-06
Q66HR2	8.53065e-06	8.90532e-06	5.46954e-06	8.5645e-06	6.61028e-06	3.55763e-06	9.31557e-06	4.18827e-06	6.36138e-06	7.05783e-06	7.99581e-06	5.4293e-06
P52873	8.85151e-06	1.19001e-05	8.57253e-06	9.05515e-06	8.84916e-06	5.0705e-06	8.44999e-06	8.70758e-06	8.93464e-06	9.65553e-06	9.67622e-06	4.1481e-06
P07171	1.02522e-05	1.2328e-05	1.15815e-05	1.1249e-05	1.19968e-05	7.75097e-06	1.31939e-05	1.24256e-05	1.14988e-05	9.97948e-06	1.14535e-05	7.51506e-06
P46101-2	1.40458e-05	1.59155e-05	1.04799e-05	1.65856e-05	1.34784e-05	5.48784e-06	1.27437e-05	9.47195e-06	1.11971e-05	1.51382e-05	1.54526e-05	2.22154e-06
D4A6C5	4.0327e-06	3.63076e-06	3.03751e-06	3.2769e-06	4.00667e-06	2.67923e-06	4.72908e-06	2.26873e-06	2.63421e-06	3.25381e-06	2.65729e-06	2.40409e-06
G3V914	9.37327e-06	1.13168e-05	1.11861e-05	1.04323e-05	9.17701e-06	8.55135e-06	9.35515e-06	9.07813e-06	1.02071e-05	9.29436e-06	1.19126e-05	8.10444e-06
D3ZMS0	1.04935e-06	1.48645e-06	4.30699e-07	1.21635e-06	2.6603e-10	7.52112e-08	5.5898e-07	4.63401e-12	5.40852e-11	1.37746e-06	1.47404e-06	5.87358e-11
D3ZNZ9	4.80136e-05	0.000111525	0.00016109	0.000136936	0.0001255	5.26264e-05	0.000156115	8.38132e-05	0.00017268	0.000143986	0.000122864	7.79065e-05
G3V6W6	1.71067e-06	2.96371e-06	2.83063e-06	1.07655e-06	3.42541e-06	3.15286e-06	2.67329e-06	1.94255e-06	8.1553e-07	1.71547e-06	3.65634e-06	1.58133e-06
D3ZVQ0	1.12146e-05	1.14481e-05	1.19377e-05	1.16169e-05	1.17057e-05	9.6181e-06	1.18252e-05	1.12574e-05	1.12026e-05	1.18799e-05	1.04434e-05	9.69082e-06
D4A5X8	1.88437e-05	2.26656e-05	2.2379e-05	1.82276e-05	5.95631e-05	1.9858e-05	2.09661e-05	1.5693e-05	1.55426e-05	6.19073e-05	2.31078e-05	1.53604e-05
D3ZTH8	8.82062e-06	3.16609e-05	1.04972e-05	1.02783e-05	3.38376e-05	7.69541e-06	2.76409e-05	7.94793e-06	1.26428e-05	2.97492e-05	9.02066e-06	7.70379e-06
K4DIC6	3.355e-05	3.373e-05	2.61004e-05	3.62657e-05	3.2909e-05	3.32286e-05	3.11123e-05	2.73406e-05	3.82913e-05	3.08737e-05	5.20769e-05	2.95548e-05
G3V6Q3	2.67818e-06	2.34096e-06	1.47032e-06	2.4229e-06	1.92082e-06	1.64819e-06	2.45473e-06	1.18879e-06	1.18351e-11	2.88058e-06	2.54349e-06	1.55161e-06
A0A096MJN4	1.17976e-05	1.23021e-05	1.10153e-05	1.1549e-05	1.26306e-05	8.34255e-06	1.10821e-05	9.46263e-06	1.13499e-05	1.34341e-05	1.05497e-05	8.29394e-06
Q6AYU5	2.07471e-05	2.232e-05	1.91462e-05	1.99461e-05	2.14772e-05	1.30914e-05	2.29597e-05	1.80306e-05	1.68777e-05	2.36157e-05	2.23062e-05	1.48055e-05
Q6AXU6	2.282e-06	4.43472e-06	9.99541e-06	3.31119e-06	2.95118e-06	3.21626e-06	2.35866e-06	6.11434e-06	5.22353e-11	3.19956e-06	1.19927e-06	1.63011e-06
P13668	1.51979e-05	1.36962e-05	1.82235e-05	1.2302e-05	1.75816e-05	6.15707e-06	1.64214e-05	1.19872e-05	1.54132e-05	2.27975e-05	9.42632e-06	9.1004e-06
Q07439	6.28171e-05	0.000148243	4.50379e-05	0.000137414	7.09749e-05	6.19341e-05	0.000156498	0.000126303	0.000131442	0.000171818	0.000165875	4.95224e-05
D3ZAA9	5.21625e-06	5.58984e-06	3.99665e-06	4.47149e-06	5.08058e-06	2.63189e-06	4.51296e-06	4.25625e-06	2.70887e-06	5.07488e-06	4.17163e-06	2.19077e-06
B2GUZ5	1.53609e-05	1.69422e-05	1.54761e-05	1.64982e-05	9.14529e-06	9.69745e-06	1.68922e-05	3.68278e-06	1.46549e-05	7.09071e-06	1.60446e-05	1.19683e-05
Q99MS0	2.74521e-06	3.58924e-06	3.75119e-06	2.91459e-06	3.02415e-06	1.60861e-06	2.41474e-06	2.3759e-06	3.04385e-06	2.07054e-06	2.92248e-06	1.19306e-06
Q5EBD0	2.74521e-06	3.58924e-06	5.00125e-06	2.91459e-06	3.02415e-06	3.35259e-06	2.41474e-06	2.3759e-06	4.36568e-06	2.07054e-06	2.92248e-06	3.17425e-06
G3V6L4	3.53953e-06	2.84652e-06	6.63504e-06	3.59434e-06	3.86438e-06	3.52032e-06	3.09747e-06	3.97647e-06	5.53179e-06	2.68557e-06	4.50006e-06	4.73241e-06
Q1WIM2-2	1.34975e-05	2.17328e-05	1.88401e-05	2.21557e-05	1.95324e-05	8.62575e-06	2.15844e-05	1.51352e-05	2.39608e-05	2.13283e-05	2.79753e-05	1.33534e-05
P35435	4.48971e-05	4.54422e-05	4.86878e-05	4.49983e-05	4.90871e-05	4.43897e-05	4.48654e-05	4.00668e-05	4.28507e-05	4.4103e-05	4.95769e-05	4.43763e-05
D4A6H8	4.88238e-06	6.62845e-06	3.32649e-05	5.56513e-06	5.97738e-06	3.69653e-06	5.80762e-06	4.42077e-06	5.1085e-06	5.93136e-06	5.26069e-06	3.03222e-06
P43244	7.1693e-06	8.00266e-06	8.25321e-06	7.96647e-06	8.20873e-06	5.61204e-06	8.11773e-06	6.19295e-06	5.90117e-06	8.4604e-06	7.10967e-06	6.88444e-06
P13086	1.67243e-05	4.04317e-05	3.3839e-05	3.73744e-05	3.94727e-05	2.07672e-05	3.83461e-05	2.71124e-05	2.48232e-05	4.05858e-05	4.36878e-05	9.91727e-06
Q9Z327-3	3.23775e-06	5.74409e-06	3.91708e-06	6.57672e-06	5.36855e-06	2.88683e-06	5.05755e-06	3.8235e-06	2.39822e-06	6.75881e-06	7.01022e-06	1.7384e-06
D4AB01	6.64454e-06	6.1064e-06	5.50924e-06	6.5551e-06	5.25361e-06	3.60431e-06	5.43497e-06	7.25947e-06	5.37257e-06	5.12126e-06	4.98454e-06	3.32775e-06
P13471	2.52314e-06	6.57615e-06	6.08034e-06	6.42805e-06	6.96105e-06	6.07606e-06	7.29716e-06	6.50462e-06	5.40634e-06	6.61128e-06	6.51769e-06	4.25165e-06
F2Z3Q8	5.77238e-06	6.65593e-06	7.9185e-06	5.90621e-06	6.15336e-06	5.14081e-06	6.30513e-06	6.32306e-06	6.78004e-06	6.08927e-06	6.5693e-06	5.85212e-06
P13638	3.02449e-05	2.75267e-05	1.793e-05	2.50041e-05	2.61903e-05	2.74223e-05	2.80967e-05	2.88546e-05	3.24909e-05	3.15427e-05	4.15164e-05	2.39029e-05
P10687	1.01414e-05	8.89786e-06	9.98646e-06	8.2144e-06	1.69528e-05	5.73818e-06	9.76192e-06	1.3098e-05	9.55052e-06	1.60047e-05	8.19122e-06	6.37377e-06
P09216	4.62349e-06	6.19384e-06	7.54232e-06	5.42029e-06	4.72985e-06	7.23315e-06	8.75755e-06	5.15317e-06	8.93172e-06	4.50029e-06	4.90303e-06	5.97193e-06
P41562	8.41657e-06	7.00505e-06	7.99905e-06	8.90623e-06	8.01718e-06	7.65034e-06	8.30778e-06	4.96187e-06	1.00592e-05	9.22827e-06	4.0627e-06	9.28042e-06
P32851	1.43622e-05	1.3994e-05	1.83855e-05	1.70865e-05	1.60977e-05	1.70996e-05	1.86773e-05	1.84982e-05	2.12027e-05	2.39964e-05	1.69158e-05	1.50017e-05
O88778	8.03663e-06	1.23875e-05	1.23911e-05	1.0697e-05	1.28607e-05	7.26213e-06	1.15431e-05	1.01048e-05	7.54908e-06	1.01443e-05	1.3482e-05	7.34366e-06
Q497B0	2.72297e-06	1.51691e-06	2.98867e-06	2.58949e-06	2.2256e-06	1.27756e-07	2.93865e-06	1.88773e-06	2.15773e-06	4.25431e-06	1.64536e-06	1.09455e-06
M0R6Y8	0.000109045	0.000120396	0.00011815	0.000110569	0.000112452	6.21776e-05	0.000123537	0.000110891	0.000112063	0.000122183	0.000105882	6.4576e-05
A8WCF8	2.25888e-06	3.15476e-06	2.9118e-06	1.76486e-06	2.52082e-06	1.13256e-06	2.69413e-10	1.92157e-06	1.98534e-06	2.61825e-06	2.28463e-06	3.85325e-06
F1LQV9	2.13134e-06	4.86591e-06	6.25799e-06	9.93602e-06	4.8197e-06	9.866e-06	1.04281e-05	9.05081e-06	8.36389e-06	6.79594e-06	8.54211e-06	7.01386e-06
Q5XIG8	2.94335e-06	2.84793e-06	3.17618e-06	2.91219e-06	2.08195e-06	8.92368e-07	4.21313e-06	2.53964e-06	1.88698e-06	2.77988e-06	1.87007e-06	1.83473e-06
G3V8U9	3.55681e-06	3.80117e-06	7.80082e-06	1.94013e-06	4.70123e-06	3.52954e-06	3.45343e-06	1.93405e-06	2.5537e-06	3.37008e-06	3.79273e-06	2.25102e-06
F7FLF2	6.9971e-06	7.9152e-06	2.8235e-06	2.77659e-06	3.81548e-06	6.84645e-06	9.28156e-06	7.05837e-06	2.56832e-06	9.03816e-06	3.40238e-06	6.05323e-06
P12785	8.69163e-06	1.01824e-05	9.37685e-06	1.44895e-05	9.05821e-06	6.20937e-06	1.0887e-05	8.18182e-06	8.71652e-06	1.38328e-05	8.60051e-06	4.92514e-06
Q62813	8.59285e-06	1.57606e-05	1.30535e-05	1.16932e-05	9.29791e-06	5.97426e-06	1.88529e-05	8.10949e-06	1.36529e-05	3.24122e-05	1.02876e-05	9.34888e-06
G3V8A5	8.11248e-06	8.79751e-06	7.3953e-06	8.3558e-06	8.55382e-06	4.31038e-06	9.22583e-06	6.67501e-06	6.4744e-06	8.39436e-06	6.4501e-06	4.36437e-06
D3ZW08	4.0785e-06	5.66086e-06	5.48098e-06	4.18902e-06	5.63658e-06	4.13333e-06	5.4339e-06	4.7597e-06	4.65642e-06	5.61799e-06	4.90556e-06	3.37634e-06
Q62785	8.48495e-07	2.11023e-06	1.59824e-06	1.61357e-06	2.00819e-06	7.61979e-07	1.97496e-06	1.39747e-06	1.9931e-06	2.10573e-06	2.11388e-06	6.64412e-07
G3V8G4	1.69209e-05	2.80432e-05	2.7992e-05	2.74915e-05	2.78098e-05	2.39449e-05	1.75945e-05	1.38648e-05	2.90555e-05	1.85629e-05	2.29359e-05	1.10358e-05
Q2TA68	6.99827e-06	7.00615e-06	9.58436e-06	6.66555e-06	6.64058e-06	5.45582e-06	6.90457e-06	6.03438e-06	5.004e-06	7.32231e-06	5.83186e-06	6.32439e-06
Q5PQZ9	9.42419e-06	1.18829e-05	1.4342e-05	9.44213e-06	1.16036e-05	6.07668e-06	1.15697e-05	1.12107e-05	1.1884e-05	5.79265e-06	1.28463e-05	4.00182e-06
P47971	7.3907e-06	8.64288e-06	5.89822e-06	6.71757e-06	6.12543e-06	4.81797e-06	7.12512e-06	6.29774e-06	4.10256e-06	5.8761e-06	7.9134e-06	4.36025e-06
D3ZVI9	6.46553e-11	7.0615e-07	1.77325e-06	1.22384e-06	5.89289e-07	2.12464e-06	6.62184e-07	2.32921e-07	2.84588e-06	9.67514e-11	1.5144e-10	1.39886e-06
P09895	1.71999e-05	1.56719e-05	6.66143e-06	1.72244e-05	1.69373e-05	6.65807e-06	1.76295e-05	6.98987e-06	6.68687e-06	6.47203e-06	6.98283e-06	5.58041e-06
B0BNJ4	1.70761e-06	2.13025e-06	1.67497e-06	1.87818e-06	1.85802e-06	1.59071e-06	1.96045e-06	1.45494e-06	1.66902e-06	1.79548e-06	1.77134e-06	1.28051e-06
Q9Z1N4	5.12179e-06	6.15857e-06	5.85753e-06	3.86821e-06	3.18791e-06	1.49599e-06	6.21383e-06	5.76717e-06	4.37108e-06	4.52979e-06	4.83074e-06	2.88398e-06
Q5U1Z2	2.66183e-06	3.3838e-06	4.13888e-06	2.97929e-06	2.30443e-06	1.28494e-06	3.92236e-06	3.35302e-06	3.54596e-06	3.32551e-06	1.69235e-06	1.76293e-06
Q5M9H7	3.30464e-06	3.43137e-06	4.57444e-06	3.07477e-06	3.40858e-06	4.98474e-06	4.15063e-06	4.68274e-06	5.49335e-06	3.92644e-06	5.2411e-06	5.46199e-06
P29266	6.76197e-06	7.76335e-06	4.79395e-06	5.47141e-06	6.57626e-06	5.2729e-06	5.6517e-06	5.01044e-06	6.50886e-06	7.39187e-06	5.41464e-06	4.48911e-06
D3ZNQ6	2.06303e-06	1.9226e-06	2.52785e-06	2.86632e-06	2.6995e-06	6.74272e-06	3.13817e-06	1.49797e-06	3.23465e-06	3.49274e-06	1.71644e-06	3.19181e-06
P63036	4.21564e-06	3.98933e-06	5.37962e-06	4.19833e-06	5.28139e-06	1.11747e-10	5.62323e-06	3.38046e-06	5.59135e-06	7.69575e-06	4.78151e-06	4.55223e-06
B0BNM9	3.148e-06	5.81574e-07	1.7145e-06	4.49024e-06	5.21774e-07	3.78669e-07	3.77463e-06	2.95488e-07	1.88423e-06	3.54166e-06	8.90126e-11	1.6404e-10
H7C5Y5	8.61217e-06	8.04693e-06	6.95006e-06	6.01665e-06	9.38235e-06	5.84521e-06	1.85637e-06	1.10439e-05	7.22151e-06	6.41005e-06	8.08054e-06	5.81075e-06
P35280	1.3931e-05	6.74042e-05	5.96716e-05	5.30627e-05	3.34016e-05	2.17116e-06	7.24887e-05	5.07717e-05	5.06339e-05	6.91936e-05	5.66654e-05	2.89026e-05
F7EMK8	4.71725e-06	4.35339e-06	5.76359e-06	2.10458e-06	4.82327e-06	4.66342e-06	6.60008e-07	3.74722e-06	9.02353e-06	3.71407e-10	4.64693e-06	4.53348e-06
Q64548	1.67205e-05	1.95663e-05	2.20076e-05	2.05014e-05	1.99266e-05	1.61193e-05	1.84391e-05	1.34636e-05	1.66995e-05	1.86933e-05	1.66685e-05	1.55015e-05
A0A096MJE6	2.114e-05	2.57082e-05	2.43007e-05	2.71087e-05	3.34554e-05	1.52137e-05	2.4658e-05	1.62024e-05	2.06997e-05	3.01993e-05	2.51675e-05	1.43332e-05
G3V7L6	2.42335e-06	2.21545e-06	2.10368e-06	4.14527e-06	2.19096e-06	1.40825e-06	4.14695e-06	6.965e-07	2.02601e-06	3.73271e-06	2.25094e-06	1.51457e-06
Q9QYF3	6.82299e-06	5.98047e-06	7.78515e-06	6.141e-06	6.20476e-06	5.50408e-06	6.03839e-06	6.26827e-06	8.75391e-06	7.04876e-06	6.47207e-06	5.93112e-06
Q4FZT9	5.30895e-06	4.59659e-06	6.30046e-06	5.32123e-06	4.26076e-06	3.80557e-06	5.03309e-06	3.71739e-06	6.26477e-06	5.3683e-06	4.71708e-06	5.51227e-06
P20059	2.81976e-10	9.5904e-07	8.07737e-11	1.70301e-06	1.92287e-10	6.87352e-07	2.87107e-06	5.73402e-06	6.64126e-06	2.93865e-06	6.41535e-07	9.43181e-08
Q9JI15	6.81333e-07	9.60442e-11	1.69135e-10	1.90527e-10	1.06187e-10	6.10575e-11	6.89309e-07	7.13603e-11	1.86029e-11	7.66083e-07	1.70973e-10	1.30488e-10
D4ADF5	3.5148e-06	3.07438e-06	5.04355e-06	4.72007e-06	3.21157e-06	3.98725e-06	3.81397e-06	2.93989e-06	4.72756e-06	3.30186e-06	3.51794e-06	4.63261e-06
Q5RKI1	1.68486e-05	2.12586e-05	1.56803e-05	1.65722e-05	1.89188e-05	1.46372e-05	1.70955e-05	1.73736e-05	1.46301e-05	1.91132e-05	2.05688e-05	1.3983e-05
D3ZUX5	4.47438e-06	2.48771e-06	3.92231e-06	4.33327e-06	4.26484e-06	4.25856e-06	4.54693e-06	4.63532e-06	3.96088e-06	4.83634e-06	5.77728e-06	4.00033e-06
Q9Z1E1	5.29429e-06	3.49655e-06	3.47939e-06	3.30855e-06	5.87934e-06	2.92274e-06	3.63182e-06	3.53169e-06	3.11418e-06	6.47672e-06	6.24252e-06	2.27991e-06
A0A0A0MY09	3.28207e-05	3.4512e-05	3.67696e-05	1.32737e-05	3.62865e-05	9.58379e-06	1.16789e-05	3.26978e-05	1.39964e-05	4.07532e-05	3.7006e-05	1.03196e-05
F1M9N9	1.9948e-05	2.35167e-05	2.49962e-05	1.88175e-05	1.74963e-05	1.04089e-05	2.4079e-05	1.71836e-05	1.65426e-05	1.78148e-05	2.51059e-05	1.08967e-05
Q5XIF3	1.2502e-05	1.16796e-05	1.28341e-05	1.20697e-05	1.5971e-05	1.25454e-05	8.06406e-06	1.02348e-05	1.09325e-05	1.49834e-05	1.17027e-05	1.05273e-05
B0K014	8.64871e-07	8.68069e-07	1.69052e-05	1.22173e-06	9.24932e-07	1.64326e-06	9.18121e-07	2.08949e-05	1.6354e-05	1.58424e-05	8.60349e-07	1.41516e-06
Q9Z2L9-5	7.00142e-06	6.56811e-06	7.405e-06	4.94062e-06	8.42558e-06	5.92966e-06	9.41284e-06	8.82778e-06	5.58115e-06	1.05372e-05	9.68633e-06	6.9643e-06
P69682	9.83667e-06	1.26298e-05	9.18033e-06	1.16001e-05	1.33528e-05	6.88533e-06	1.28145e-05	7.56384e-06	9.0682e-06	1.41127e-05	1.21455e-05	7.10407e-06
I6L9G6	7.27149e-06	6.18588e-06	4.34462e-06	7.64683e-06	6.59313e-06	3.32431e-06	6.74305e-06	4.26765e-06	3.18918e-06	7.54292e-06	4.8247e-06	2.28204e-06
F1LT36	3.29805e-06	3.66519e-06	4.71876e-06	3.40288e-06	3.64998e-06	1.05098e-06	3.4422e-06	3.30303e-06	4.83184e-06	3.52923e-06	2.63322e-06	5.583e-06
P35745	5.75639e-06	6.41474e-06	7.33009e-06	8.26398e-06	6.18952e-06	6.62402e-06	6.25184e-06	3.49114e-06	7.44739e-06	7.06676e-06	5.6554e-06	4.64442e-06
Q99ML5	2.57615e-06	2.52685e-06	1.9725e-06	2.38508e-06	2.44162e-06	1.17822e-06	1.93464e-06	1.49422e-06	3.67913e-06	2.71875e-06	2.58523e-06	2.60517e-06
M0RA26	5.52782e-06	4.6765e-06	3.706e-06	6.12238e-06	6.3229e-06	7.11723e-06	5.27141e-06	5.01245e-06	6.44688e-06	4.02583e-06	7.24902e-06	3.70822e-06
Q9QXU9	1.31357e-05	1.23328e-05	1.19813e-05	1.39131e-05	1.45022e-05	1.21236e-05	1.504e-05	1.25145e-05	3.92013e-06	1.13809e-05	1.34116e-05	1.69015e-05
D3ZWR4	1.66058e-05	1.75001e-05	1.57152e-05	1.6555e-05	7.03947e-06	8.74441e-06	1.78905e-05	7.99543e-06	1.40913e-05	1.34986e-05	1.67834e-05	1.35558e-05
G3V9Z3	9.618e-06	8.81771e-06	9.52188e-06	9.35994e-06	9.84418e-06	5.52947e-06	9.78368e-06	1.12151e-05	8.34147e-06	8.13882e-06	7.78369e-06	6.0158e-06
M0RDI5	5.13901e-06	7.24123e-06	8.16259e-06	1.26334e-06	4.94984e-06	5.18606e-06	5.8909e-06	7.1959e-06	5.6862e-06	5.41087e-06	5.14157e-06	8.22056e-06
P08082	1.51559e-05	2.08253e-05	1.88881e-05	1.95869e-05	2.44953e-05	1.21192e-05	2.09748e-05	1.68362e-05	1.45767e-05	2.20578e-05	2.34456e-05	1.73835e-05
Q03555-6	3.77064e-06	3.72012e-06	3.76129e-06	3.62456e-06	3.64753e-06	3.20667e-06	5.11037e-06	2.48627e-06	2.71071e-06	3.15019e-06	4.30894e-06	2.11674e-06
F1LM42	1.55153e-05	2.18925e-05	2.41048e-05	1.6531e-05	1.51912e-05	9.99463e-06	2.28336e-05	1.16336e-05	1.53577e-05	1.58424e-05	2.43375e-05	1.08967e-05
P97536	1.19876e-05	1.27474e-05	1.24623e-05	1.2799e-05	1.27032e-05	8.02492e-06	1.35582e-05	9.9567e-06	1.23133e-05	1.26806e-05	1.02462e-05	8.39789e-06
F1LPB9	8.53739e-06	9.62182e-06	8.32841e-06	9.34918e-06	7.10755e-06	4.73003e-06	8.12737e-06	7.49623e-06	6.95889e-06	1.15895e-05	1.01879e-05	6.55238e-06
Q3KRD5	1.89706e-06	1.86339e-06	2.35278e-06	1.626e-06	1.74845e-06	1.83251e-06	8.42023e-07	1.13731e-06	1.56054e-06	1.86456e-06	1.41619e-06	1.97347e-06
F1LQI1	6.81412e-06	1.17519e-05	8.993e-06	9.01974e-06	7.11625e-06	6.12645e-06	7.25403e-06	6.10984e-06	6.52911e-06	1.45302e-05	5.85448e-06	7.0664e-06
P40307	4.29631e-06	4.96291e-06	8.38422e-06	5.99232e-06	4.96655e-06	6.69119e-06	5.11585e-06	6.39879e-06	4.12684e-06	6.56419e-06	5.38495e-06	7.39911e-06
Q5FVJ0	6.33092e-06	5.49722e-06	5.50509e-06	5.5745e-06	6.53759e-06	4.45665e-06	7.66434e-06	5.72457e-06	6.30215e-06	5.82139e-06	7.18277e-06	4.17395e-06
B0BNE6	1.14615e-05	1.57975e-05	7.07435e-06	1.29033e-05	1.38008e-05	6.35773e-06	1.43545e-05	6.55088e-06	1.08134e-05	1.53588e-05	1.38318e-05	5.04771e-06
D3ZQD3	1.25512e-05	1.28845e-05	1.08789e-05	1.15961e-05	9.54278e-06	3.04377e-06	1.09488e-05	1.09729e-05	9.9508e-06	8.83838e-06	1.02605e-05	3.69352e-06
P12711	8.9731e-06	1.05657e-05	7.96777e-06	1.06272e-05	8.99895e-06	5.19183e-06	9.97236e-06	8.79594e-06	8.95822e-06	9.21481e-06	8.7098e-06	7.31593e-06
F1M4T3	3.16133e-06	3.17522e-06	3.54594e-11	3.04049e-06	3.28283e-06	1.08743e-06	3.8231e-06	1.11387e-06	1.35351e-06	5.36901e-06	1.50917e-06	3.43901e-11
P97546	2.28451e-05	2.17363e-05	3.55031e-05	1.93241e-05	1.94413e-05	3.1249e-05	2.07438e-05	1.99361e-05	3.20549e-05	2.96812e-05	2.54451e-05	2.35244e-05
Q05683	1.54029e-05	1.69951e-05	1.47489e-05	1.46344e-05	1.39057e-05	1.14464e-05	1.60005e-05	9.88204e-06	1.20193e-05	1.71666e-05	1.45352e-05	1.36631e-05
G3V6Q6	3.84185e-06	2.05187e-06	6.75994e-06	8.11749e-06	7.25069e-06	7.44081e-06	8.92859e-06	6.80406e-06	1.40706e-05	7.42378e-06	9.01813e-06	6.46133e-06
Q6AXX6	7.11419e-06	6.63294e-06	5.93489e-06	6.24997e-06	6.35318e-06	4.10502e-06	6.03829e-06	5.72986e-06	5.11647e-06	6.35923e-06	5.99488e-06	5.33934e-06
Q02874-2	6.0658e-06	5.25482e-06	5.64797e-06	4.94598e-06	6.75251e-06	1.72191e-06	5.98456e-06	4.24313e-06	4.31776e-06	5.65746e-06	4.54132e-06	4.69089e-06
M0RDJ7	4.73059e-06	5.12101e-06	2.50487e-06	1.12101e-06	6.39436e-06	6.93097e-06	6.12715e-06	4.66404e-06	8.79556e-06	1.3976e-06	1.47046e-06	5.81653e-06
M0R6G9	7.81042e-07	3.21107e-07	3.79584e-11	2.46352e-06	1.52187e-10	1.39904e-06	1.41606e-10	5.82418e-11	6.8161e-11	2.11504e-10	1.23973e-06	2.06675e-07
P53042	3.97955e-06	4.16029e-06	3.71278e-06	5.98471e-06	5.04265e-06	2.89178e-06	5.31701e-06	2.29853e-06	3.36208e-06	5.12943e-06	3.54006e-06	4.17038e-06
B2RYQ2	7.2763e-06	7.54684e-06	4.95901e-06	6.34905e-06	4.78539e-06	4.70406e-06	8.83656e-06	4.87868e-06	7.62792e-06	1.45918e-06	6.00729e-06	4.71104e-06
Q6RJR6	1.40438e-05	1.15358e-05	1.18246e-05	9.53714e-06	1.30347e-05	1.27261e-05	1.34173e-05	1.08122e-05	1.11965e-05	1.08293e-05	1.26818e-05	1.07997e-05
Q4G009	2.33227e-06	3.73712e-06	3.58233e-06	3.51516e-06	3.49241e-06	2.07103e-06	3.58818e-06	2.00806e-06	2.94133e-06	3.73741e-06	4.16972e-06	2.82531e-06
D3ZYM7	7.04811e-07	2.34625e-10	9.29001e-07	2.84225e-10	6.53986e-11	1.02897e-11	6.67649e-07	3.85131e-07	2.22247e-10	8.73911e-07	2.32695e-10	8.69138e-11
F1LQW3	9.8439e-06	8.98391e-06	9.06897e-06	7.61804e-06	9.77862e-06	4.24662e-06	9.92854e-06	8.17599e-06	8.12315e-06	1.06537e-05	1.05601e-05	8.77602e-06
D4A8U7	5.7452e-06	6.84713e-06	7.86453e-06	6.98481e-06	5.70013e-06	4.51443e-06	7.05938e-06	5.3331e-06	5.98186e-06	7.98912e-06	7.5871e-06	3.53465e-06
D3ZAY2	5.8023e-06	6.74347e-06	6.47537e-06	8.27626e-06	1.11213e-05	4.88576e-06	8.52513e-06	5.66496e-06	4.32671e-06	6.78177e-06	7.75587e-06	5.5827e-06
Q9Z272	4.42725e-06	4.46347e-06	2.51072e-06	4.00592e-06	5.68173e-06	3.45445e-06	4.50089e-06	5.08985e-06	4.31108e-06	5.75408e-06	3.66335e-06	2.42322e-06
G3V624	1.13883e-05	7.44023e-06	6.96808e-06	6.60358e-06	6.47393e-06	5.23474e-06	1.16933e-05	6.3577e-06	5.63994e-06	5.75612e-06	7.15655e-06	5.01481e-06
P24155	3.67861e-06	5.26881e-06	4.09151e-06	3.912e-06	3.65323e-06	2.45769e-06	4.92554e-06	4.80814e-06	3.73378e-06	5.14702e-06	4.74592e-06	3.66533e-06
Q6P799	5.19971e-06	5.02579e-06	5.29549e-06	4.47426e-06	4.81654e-06	4.08261e-06	4.73105e-06	3.71211e-06	5.11662e-06	4.20164e-06	4.49466e-06	4.32861e-06
P22734-2	1.55552e-06	1.2174e-06	1.34794e-10	1.31717e-06	1.01757e-06	1.67253e-06	1.70736e-10	2.40535e-10	3.17666e-06	1.18818e-06	1.95743e-10	1.40083e-06
Q6AYQ8	1.11776e-06	1.03654e-06	1.67634e-10	1.54065e-06	2.2089e-06	1.13534e-06	1.74132e-06	2.18509e-06	3.0165e-06	2.0215e-06	2.9038e-06	1.05132e-06
D3ZX87	1.20956e-05	1.18733e-05	2.75411e-06	6.78326e-06	6.86001e-06	1.56833e-11	6.25015e-06	4.49999e-06	2.9727e-06	9.04297e-06	3.61931e-06	5.88714e-06
Q5M9I5	2.75891e-05	5.00055e-05	5.61125e-05	4.39301e-05	4.04509e-05	4.24322e-05	4.28727e-05	2.73294e-05	4.42505e-05	5.09007e-05	4.03432e-05	4.73245e-05
Q6AYN4	7.69453e-06	1.20749e-05	1.47598e-05	7.72063e-06	1.01548e-05	7.4236e-06	1.07065e-05	8.4378e-06	9.44497e-06	1.04513e-05	6.77354e-06	7.41131e-06
P18266	2.9332e-06	4.09951e-06	3.59213e-06	5.37412e-06	5.47467e-06	5.50303e-06	7.54113e-06	8.02976e-06	8.63703e-06	4.48818e-06	4.7208e-06	5.20087e-06
P25286-2	4.04211e-05	4.46462e-05	3.95357e-05	4.39358e-05	4.98861e-05	2.57569e-05	4.42045e-05	3.88499e-05	3.91056e-05	4.7477e-05	5.0407e-05	2.52479e-05
Q498R7	2.64528e-06	2.24516e-06	2.65379e-06	2.75927e-06	2.0031e-06	1.02317e-06	2.3519e-06	1.69671e-06	2.10614e-06	1.92467e-06	2.09204e-06	1.43052e-06
D4A559	1.86067e-06	5.05242e-06	5.29489e-06	5.53383e-06	4.12049e-06	2.02885e-06	5.19038e-06	3.37983e-06	4.96465e-06	5.11689e-06	4.43484e-06	1.79796e-06
P0DJJ3	2.23651e-06	7.37152e-06	5.67764e-06	5.70936e-06	7.06484e-06	3.27819e-06	5.05834e-06	5.12032e-06	6.30201e-06	8.50171e-06	7.90641e-06	3.21439e-06
P54690	7.63078e-06	7.85639e-06	7.50401e-06	7.43273e-06	5.78904e-06	3.99628e-06	6.25539e-06	6.34889e-06	5.81518e-06	7.47159e-06	5.29803e-06	5.70389e-06
Q6IMY8	1.7423e-05	1.68215e-05	1.33249e-05	1.49823e-05	1.64052e-05	1.32286e-05	1.74685e-05	1.53194e-05	6.95896e-06	1.84328e-05	1.38736e-05	1.22041e-05
D4A3I4	9.25119e-11	2.39073e-06	1.73055e-10	1.29707e-10	2.39575e-10	1.15766e-10	2.09967e-10	2.82691e-10	1.41447e-11	1.86178e-10	6.43133e-11	1.94721e-10
F1M6C4	1.28273e-06	1.42751e-10	2.4563e-06	3.32405e-06	2.32993e-06	1.43365e-06	2.33606e-06	2.30871e-06	2.40449e-06	2.45436e-06	4.03575e-06	8.87501e-07
P85968	5.12213e-06	5.25806e-06	3.60839e-06	4.83274e-06	3.6774e-06	3.54347e-06	3.25212e-06	5.04115e-06	4.02231e-06	2.85691e-06	5.61115e-06	3.1431e-06
D3ZGE6	2.00583e-05	1.89137e-05	1.58406e-05	1.95007e-05	1.85141e-05	1.10273e-05	1.97207e-05	1.7481e-05	1.30121e-05	2.13537e-05	2.68645e-05	2.15986e-05
Q56A26	7.21428e-06	3.39364e-06	1.08648e-05	1.21126e-05	8.218e-06	3.05419e-06	7.26166e-06	5.71614e-06	1.19182e-05	8.52643e-06	6.6678e-06	2.5921e-06
M0RE00	1.52424e-06	2.20718e-06	1.50695e-06	2.34202e-06	1.98272e-06	1.80199e-06	2.24735e-06	1.41874e-06	1.71678e-10	2.41628e-06	1.77268e-06	1.49657e-06
F1LQQ1	4.02878e-06	2.78788e-06	4.31671e-06	1.42353e-06	3.04156e-06	2.56322e-06	4.1278e-06	4.22893e-06	4.44152e-06	3.27547e-06	3.82859e-06	2.76259e-06
D4A7L4	1.36091e-05	1.22123e-05	1.30897e-05	1.12199e-05	1.25501e-05	1.03028e-05	1.33473e-05	1.4044e-05	1.19457e-05	1.3614e-05	1.96857e-05	1.50662e-05
G3V913	8.33729e-11	1.86782e-10	1.38946e-10	2.08796e-10	3.54005e-11	2.21504e-11	1.47301e-06	9.81829e-07	5.47298e-06	2.68255e-06	1.68957e-06	1.12265e-10
E2RUH2	2.25137e-06	3.20115e-06	2.59976e-06	2.42351e-06	2.41693e-06	2.36731e-06	3.17539e-06	3.07113e-06	2.85508e-06	3.22411e-06	3.31485e-06	2.5603e-06
B0BNN3	1.60592e-10	2.1698e-10	1.13916e-10	9.18136e-11	1.16874e-10	2.2225e-10	1.10698e-10	5.82019e-07	1.17887e-06	2.00141e-06	1.29645e-06	6.99198e-11
Q6AY65	1.31155e-06	8.44662e-07	1.27034e-06	9.91991e-07	1.06717e-06	7.24984e-07	1.06507e-06	5.61748e-11	1.27307e-06	1.20427e-06	8.16026e-07	6.88225e-07
G3V946	2.55876e-07	2.19901e-06	1.8993e-06	1.96985e-06	1.85438e-06	8.96749e-12	2.03717e-06	1.83963e-06	1.16021e-06	1.88531e-06	1.34883e-06	1.08727e-06
P14668	8.89917e-06	9.61767e-06	8.53874e-06	8.23903e-06	9.059e-06	3.40805e-06	9.18153e-06	6.06709e-06	6.66308e-06	1.04795e-05	7.50645e-06	5.12027e-06
Q5EGY4	1.86744e-06	2.38311e-06	2.85697e-06	3.32607e-06	2.28233e-06	1.50779e-06	2.45394e-06	7.15566e-07	1.92141e-06	3.77305e-06	3.51132e-10	1.56657e-06
D4A3C2	8.36994e-06	3.77767e-06	2.64557e-06	9.18145e-06	4.30617e-06	2.21724e-06	8.97741e-06	3.83558e-06	7.85636e-06	8.29169e-06	5.42549e-06	2.11532e-06
Q63345	3.03732e-05	3.39725e-05	4.2308e-05	5.19705e-05	3.07566e-05	2.24636e-05	3.23425e-05	1.48087e-05	4.48412e-05	3.9562e-05	3.01622e-05	1.35891e-05
M0R9D0	7.56209e-06	7.23084e-06	5.79758e-06	7.85297e-06	5.39559e-06	5.83238e-06	7.77412e-06	5.87145e-06	5.68437e-06	8.76209e-06	6.83129e-06	6.65985e-06
P13084	2.36009e-05	3.09965e-05	1.9095e-05	2.89914e-05	2.548e-05	4.25094e-06	6.71279e-06	3.60819e-06	4.05183e-06	2.86463e-05	4.45214e-06	2.86596e-06
A1L1J8	1.17547e-05	1.22249e-05	1.44838e-05	1.41646e-05	1.24567e-05	1.05212e-05	1.33833e-05	1.06526e-05	1.07662e-05	1.29648e-05	1.37161e-05	6.37078e-06
P46844	1.79806e-06	2.5329e-06	2.13821e-06	2.34771e-06	1.90202e-06	1.27962e-06	2.89409e-06	1.09261e-06	2.43999e-06	3.61975e-06	1.90871e-06	5.26044e-07
Q6AZ33	1.07306e-06	1.47398e-06	2.13821e-06	2.13115e-06	2.04884e-06	1.27962e-06	4.00746e-06	1.09261e-06	2.43999e-06	2.82422e-06	8.24897e-07	5.26044e-07
Q9Z2L9-2	7.00142e-06	6.56811e-06	7.405e-06	4.99435e-06	8.42558e-06	5.92966e-06	9.41284e-06	8.82778e-06	5.58115e-06	1.05372e-05	9.68633e-06	6.9643e-06
F1M164	8.21404e-06	9.26521e-06	8.19319e-06	7.71474e-06	8.06399e-06	1.79252e-05	8.45513e-06	7.71525e-06	5.70833e-06	8.6726e-06	7.33567e-06	5.81045e-06
Q6AYP5	1.09077e-05	1.10782e-05	9.7047e-06	1.15819e-05	1.0322e-05	4.93208e-06	1.11172e-05	5.42792e-06	1.02357e-05	1.09411e-05	1.01284e-05	5.22938e-06
D4AAZ6	4.34936e-06	3.79284e-06	2.55395e-06	4.29043e-06	3.21483e-06	4.59387e-06	4.34677e-06	2.40759e-06	1.54664e-06	3.36047e-06	3.05238e-06	2.19714e-06
Q6AZ26	1.01447e-05	1.10522e-05	9.99569e-06	9.59343e-06	1.30446e-05	7.42325e-06	9.27069e-06	1.03074e-05	8.72926e-06	1.08132e-05	8.58742e-06	5.60981e-06
P41123	1.15588e-05	4.77295e-06	9.57963e-06	9.73948e-06	7.36508e-06	6.05341e-06	4.70285e-06	5.93826e-06	8.15803e-06	2.99106e-06	6.07518e-06	6.48648e-06
O70593	5.64668e-06	5.9987e-06	7.09998e-06	5.40761e-06	6.07987e-06	6.11454e-06	6.87462e-06	4.0858e-06	5.34109e-06	6.50609e-06	5.22409e-06	2.68091e-06
D3ZZ95	6.55387e-06	4.96931e-06	8.56025e-06	5.78824e-06	5.29722e-06	4.67119e-06	5.06882e-06	4.70884e-06	5.71802e-06	4.6193e-06	4.8039e-06	1.23013e-10
Q6P7A7	3.94158e-06	4.55147e-06	3.55167e-06	3.61899e-06	4.11191e-06	2.62472e-06	3.39843e-06	4.67185e-06	3.43845e-06	3.23779e-06	4.28211e-06	3.92627e-06
D4AD70	8.57296e-06	3.65592e-06	9.9566e-06	8.28161e-06	6.41081e-06	2.94211e-06	1.00383e-05	6.29761e-06	8.7616e-06	8.74435e-06	1.00941e-05	3.07329e-06
F7F744	7.39243e-06	5.92956e-06	1.07385e-05	6.85251e-06	6.09796e-06	3.33338e-05	6.355e-06	4.69633e-06	6.44111e-06	7.19197e-06	5.04881e-06	6.42865e-06
E9PU16	2.61093e-05	7.11538e-05	6.68205e-05	6.04548e-05	2.76356e-05	1.66913e-05	6.4685e-05	5.14659e-05	5.65355e-05	6.14379e-05	6.13621e-05	4.18522e-05
D3ZCH7	5.60821e-06	6.88621e-06	6.87359e-06	6.27938e-06	6.98258e-06	4.38161e-06	4.21404e-06	3.67767e-06	6.9357e-06	7.24635e-06	7.19209e-06	4.4826e-06
D3ZYW2	1.31776e-05	1.26489e-05	1.09297e-05	1.24258e-05	1.29872e-05	1.0702e-05	1.41684e-05	1.20149e-05	5.98195e-06	1.37613e-05	1.0986e-05	7.16786e-06
P50475	5.84104e-06	5.58655e-06	3.97947e-06	5.70741e-06	5.08858e-06	3.68783e-06	5.15319e-06	5.18438e-06	3.98872e-06	6.49648e-06	5.88363e-06	3.58941e-06
Q4KLJ0	6.7287e-06	5.85601e-06	6.32789e-06	6.81229e-06	6.44734e-06	3.29743e-06	6.30237e-06	2.33959e-06	5.8004e-07	6.48245e-06	5.89574e-06	4.3543e-06
P07825	0.000102234	6.76592e-05	0.00012917	5.41681e-05	0.000125142	7.54779e-05	6.86679e-05	8.69728e-05	0.000103803	0.000116383	0.000111053	9.6244e-05
P02680-2	1.26295e-10	2.34351e-10	1.31449e-10	1.0485e-10	2.61638e-10	2.27395e-10	8.87432e-07	6.39071e-06	3.29701e-06	3.32725e-06	1.46942e-06	7.55286e-12
M0RAK2	4.57341e-07	1.14111e-06	1.83676e-10	5.80714e-07	1.07867e-06	8.26188e-11	1.53598e-06	8.21472e-07	1.02046e-10	1.54975e-06	1.05461e-10	8.72154e-11
G3V6R0	0.000153089	0.000159426	0.000209408	0.00021664	0.000140968	0.000155353	0.000191506	0.000173818	0.000172623	0.000232426	0.000218226	0.000160615
O35764	5.90259e-06	5.80129e-06	6.78944e-06	5.8848e-06	3.98086e-06	4.92023e-06	5.74389e-06	4.97023e-06	6.64105e-06	5.80228e-06	6.04841e-06	4.36549e-06
F1LVC3	1.07043e-05	5.78163e-05	5.28574e-05	6.2681e-05	1.07683e-05	4.38633e-06	4.54153e-05	0.000110728	4.10238e-05	4.35521e-05	7.02802e-05	8.05201e-05
G3V7U4	2.00231e-06	2.06958e-06	2.10133e-06	2.40819e-06	2.77834e-06	2.6959e-06	2.38628e-06	2.04996e-06	3.03324e-06	3.49953e-06	2.37759e-06	2.63215e-06
F1LRZ7	1.71197e-05	2.12676e-05	5.41101e-05	1.9854e-05	1.49098e-05	4.72067e-05	5.40867e-05	1.09286e-05	5.99819e-05	5.30936e-05	1.35761e-05	1.93294e-05
O35964	2.45338e-05	2.74107e-05	3.74452e-05	2.55382e-05	2.71176e-05	1.40141e-05	3.17275e-05	1.87262e-05	3.06456e-05	2.90349e-05	2.90845e-05	1.69343e-05
Q6AYI1	4.80616e-06	6.66084e-06	7.82196e-06	6.36691e-06	5.33156e-06	5.33187e-06	5.32725e-06	3.41944e-06	6.49029e-06	6.45626e-06	3.50062e-06	3.67249e-06
D3Z955	4.45583e-06	9.79045e-06	7.02872e-06	2.94161e-06	8.88027e-06	4.23363e-06	4.51423e-06	7.30967e-06	4.78081e-06	5.03422e-06	4.5615e-06	1.48639e-06
Q68FZ8	2.39342e-06	1.6028e-06	1.39656e-06	1.85194e-06	2.15211e-06	1.23827e-06	1.81969e-06	1.82191e-06	8.24706e-07	1.55855e-06	1.81397e-06	9.65991e-07
P12001	1.22785e-05	1.1071e-05	8.72814e-06	1.04299e-05	8.60517e-06	6.0776e-06	1.04949e-05	1.20744e-05	6.79624e-06	9.55415e-06	9.33122e-06	6.56646e-06
P19103	2.58006e-06	3.79178e-06	3.32398e-06	2.90261e-06	3.25689e-06	1.6724e-10	3.32294e-06	2.09954e-06	6.59203e-11	3.85192e-06	3.85437e-06	6.91263e-07
P62907	6.17168e-06	5.2416e-06	7.8165e-06	5.97098e-06	4.3516e-06	4.81562e-06	7.98558e-06	5.58653e-06	6.77645e-06	4.22754e-06	5.76136e-06	6.42793e-06
P15429	0.00010736	0.000208672	0.000181078	0.000171401	0.000193856	5.74051e-05	0.000203858	0.000114896	0.000180076	0.00018925	0.000193264	2.04737e-05
P32232-2	3.99436e-06	3.03387e-06	3.69446e-06	3.7294e-06	3.92983e-06	2.34347e-06	3.82425e-06	2.31869e-06	3.91423e-06	4.52495e-06	4.22802e-06	1.5644e-06
Q5HZY2	1.08774e-10	4.76439e-07	2.56106e-06	2.37703e-10	1.26844e-10	6.89253e-11	3.26824e-06	2.90891e-07	1.53385e-06	1.57088e-05	5.49167e-11	2.24241e-06
P28023	5.7452e-06	5.67023e-06	6.27832e-06	6.39466e-06	5.70013e-06	3.92757e-06	6.17713e-06	4.07766e-06	3.48889e-06	7.13272e-06	5.72791e-06	3.69339e-06
Q5U2P5	1.28261e-06	3.45399e-06	9.46036e-07	1.679e-06	3.33901e-06	1.77078e-06	9.16273e-07	2.82737e-06	3.03351e-06	1.86929e-06	2.92574e-06	1.32138e-06
Q9R1T1	2.78009e-06	6.13666e-06	4.71232e-06	4.6051e-06	3.65475e-06	1.5034e-07	3.81686e-06	3.91316e-07	2.41017e-06	3.53202e-06	3.94347e-06	2.30226e-06
G3V6L9	1.44819e-06	1.70947e-06	2.66908e-06	2.20465e-06	2.7274e-06	2.00035e-06	2.26507e-06	2.17566e-06	1.37478e-06	2.65088e-06	2.62561e-06	1.74743e-06
P01830	9.30946e-05	0.00015584	0.000131402	0.000115235	0.000139275	9.43733e-05	0.000115619	9.12356e-05	0.000152906	0.000115577	0.00016194	7.7763e-05
F1LTQ2	0.000191716	0.0010787	0.000641655	0.000509436	0.000926419	2.45739e-05	0.000511063	0.000140722	0.000651046	0.000691929	0.000428336	0.00015683
Q9JJ54-4	1.31172e-05	1.74589e-05	1.05719e-05	1.34673e-05	1.68225e-05	1.64307e-05	1.89932e-05	1.24469e-05	5.64211e-06	1.34074e-05	1.42687e-05	7.16414e-06
D4AEH3	2.61198e-06	2.72587e-06	3.39604e-06	2.4682e-06	3.00927e-06	2.57462e-06	3.06909e-06	2.80394e-06	2.93784e-06	2.77401e-06	2.89143e-06	2.17561e-06
Q6MFY6	2.09728e-10	1.34413e-06	1.39621e-10	2.03812e-06	3.99097e-11	7.43582e-11	1.30454e-06	3.23647e-10	2.07987e-10	9.10932e-11	2.68969e-06	1.91704e-10
P97544	6.27883e-06	1.00341e-05	5.55964e-06	6.83241e-06	7.78633e-06	3.53595e-06	8.11004e-06	6.26578e-06	7.26896e-06	7.25736e-06	9.96431e-06	2.26115e-06
P97685	1.55594e-05	1.5101e-05	1.61933e-05	1.56513e-05	1.7984e-05	8.42176e-06	1.45845e-05	1.42958e-05	1.24271e-05	1.57468e-05	1.63251e-05	1.15892e-05
Q9Z269	8.34794e-06	8.60785e-06	6.1344e-06	3.68234e-06	9.41306e-06	8.06563e-06	9.75882e-06	6.953e-06	6.20421e-06	9.51269e-06	7.95304e-06	2.28145e-06
P05370	2.11021e-06	1.91151e-06	2.2355e-06	1.86351e-06	1.96267e-06	1.35598e-06	2.0163e-06	1.98168e-06	1.65369e-06	2.19441e-06	2.51944e-06	1.43565e-06
Q9JJ54-3	1.31891e-05	1.74589e-05	1.05719e-05	1.34673e-05	1.68225e-05	1.64307e-05	1.89932e-05	1.24469e-05	5.80149e-06	1.34074e-05	1.42687e-05	7.60457e-06
F1M7K7	1.29307e-05	1.53642e-05	1.28319e-05	1.54891e-05	1.22532e-05	4.40416e-06	1.50421e-05	1.21899e-05	7.45427e-06	1.34938e-05	1.55975e-05	5.57964e-06
F1LQ96	2.81992e-10	4.7086e-07	1.74869e-10	6.10533e-12	4.91185e-11	2.30694e-10	3.04019e-11	7.58443e-12	1.10446e-10	7.75096e-12	2.45247e-10	2.80663e-11
B0BN18	3.80056e-06	4.44911e-06	4.31355e-06	3.40359e-06	3.00728e-06	2.82861e-06	3.64186e-06	2.15245e-06	3.78405e-06	3.06499e-06	9.75212e-07	3.07091e-06
Q7TMC7	7.27706e-06	1.11066e-05	7.76479e-06	7.80479e-06	6.95028e-06	5.41789e-06	9.75976e-06	1.79893e-05	2.83498e-05	1.38341e-05	8.74696e-06	4.3697e-06
D4A5X7	8.57857e-06	1.19136e-05	9.10631e-06	9.01905e-06	1.30361e-05	8.6468e-06	1.03175e-05	8.90998e-06	6.21009e-06	9.74287e-06	1.042e-05	4.32919e-06
P31232	4.80137e-06	3.7324e-06	3.37605e-06	2.93757e-06	1.26346e-06	4.02322e-06	1.96683e-06	2.42375e-06	3.84387e-06	4.22098e-06	3.36982e-06	5.06889e-06
Q63327-2	1.98633e-06	4.17466e-06	1.13582e-06	5.03328e-06	1.47182e-06	1.88854e-06	1.78223e-06	1.50317e-06	2.78219e-06	1.73711e-06	1.39955e-06	1.52594e-06
Q5M821	3.02032e-06	2.97851e-06	2.89237e-06	2.57384e-06	3.21647e-06	1.85136e-06	2.2666e-06	3.44631e-06	3.0789e-06	3.72619e-06	3.65415e-06	2.15758e-06
P52759	7.80856e-06	8.82194e-06	1.27381e-05	9.01556e-06	9.89772e-06	5.37907e-06	7.85089e-06	9.07288e-06	4.73079e-06	7.75521e-06	9.34086e-06	3.54924e-06
D3ZJD3	3.63869e-06	3.43468e-06	9.59609e-06	4.35611e-06	7.5789e-06	2.92608e-06	4.04352e-06	4.03546e-06	1.08274e-06	3.91696e-06	5.68468e-06	4.34365e-06
P27682	2.54617e-06	4.27214e-06	3.82575e-06	3.7638e-06	3.48243e-06	1.88581e-06	2.65974e-06	3.17975e-06	1.15203e-06	4.58821e-06	3.87893e-06	1.34614e-06
P09330	5.97184e-06	6.99318e-06	1.16314e-05	7.65591e-06	9.14083e-06	5.734e-06	2.10226e-06	7.8083e-06	8.6946e-06	4.35477e-06	7.53374e-06	2.27976e-06
P36876	6.41493e-06	7.32333e-06	6.32623e-06	5.40826e-06	5.65839e-06	2.66712e-06	6.48825e-06	5.81878e-06	6.7322e-06	7.8795e-06	7.01239e-06	5.06982e-06
P11951	3.08991e-05	3.2587e-05	3.19641e-05	2.57805e-05	3.07048e-05	3.59299e-05	3.14979e-05	3.37301e-05	3.40853e-05	2.64581e-05	3.26077e-05	3.28209e-05
Q5U2S7	8.7012e-07	3.42967e-06	2.77054e-06	3.45986e-06	1.02392e-06	9.63846e-07	4.06659e-06	2.50757e-06	2.43856e-06	4.23236e-06	2.76556e-06	1.50444e-06
B2RZ79	8.47369e-11	4.07108e-07	1.95949e-10	2.84272e-10	1.78439e-06	4.36193e-08	8.54513e-07	1.21918e-06	5.02897e-07	7.37718e-07	3.42193e-11	1.65157e-10
D4A8X4	6.85852e-06	7.55564e-06	5.58275e-06	6.7229e-06	8.18207e-06	5.03049e-06	7.87878e-06	9.85041e-06	4.11005e-06	6.19805e-06	9.61904e-06	4.83262e-06
Q6QIX3	4.48145e-06	4.42925e-06	3.95738e-06	4.71944e-06	1.69482e-05	3.80035e-06	4.45988e-06	3.4408e-06	5.76179e-06	4.61618e-06	4.93348e-06	3.72254e-06
G3V6S2	5.27751e-06	3.88164e-06	5.61735e-06	4.18765e-06	3.89076e-06	3.87903e-06	3.94518e-06	2.53856e-06	5.67615e-06	4.26344e-06	3.673e-06	2.6855e-06
P37397	1.3717e-06	1.42118e-10	5.72579e-07	1.5187e-06	1.17653e-07	2.74582e-07	1.60836e-06	9.12474e-07	4.0983e-06	1.19909e-06	1.88733e-06	6.66986e-07
B1WC61	3.10362e-06	3.99129e-06	5.47493e-06	2.87194e-06	4.07133e-06	2.98646e-06	2.78139e-06	3.40789e-06	4.22579e-06	2.13106e-06	3.31191e-06	2.74831e-06
P09495	2.40449e-05	2.5121e-05	4.69524e-06	2.3061e-05	2.58482e-05	1.62751e-05	2.29835e-05	2.5006e-05	1.82596e-05	2.49789e-05	2.06465e-05	6.42702e-06
G3V7Q6	5.52128e-06	4.58546e-06	7.53205e-06	5.41043e-06	5.74174e-06	4.96674e-06	5.59955e-06	3.88704e-06	5.87419e-06	5.16471e-06	5.52646e-06	5.60215e-06
Q9QZR6-2	4.89426e-06	3.70079e-06	3.82851e-06	4.19171e-06	4.76641e-06	2.77373e-06	5.83973e-06	6.13424e-07	4.77014e-06	4.64548e-06	4.92413e-06	2.30747e-06
Q7M767	1.44247e-05	1.6703e-05	9.32601e-06	1.46679e-05	5.33033e-06	8.31515e-06	1.47477e-05	1.15642e-05	7.92811e-06	1.6436e-05	8.69289e-06	3.10815e-06
F1LPV0	6.00929e-06	5.92118e-06	4.50294e-06	6.27302e-06	5.69495e-06	2.12966e-06	6.37603e-06	4.90405e-06	4.95037e-06	6.40704e-06	5.01683e-06	3.96007e-06
Q63945-2	3.24002e-06	2.93956e-06	2.99209e-06	2.85467e-06	3.11764e-06	3.99335e-06	3.63556e-06	3.43441e-06	2.62566e-06	4.78123e-06	3.73909e-06	3.38821e-06
Q5XHZ0	2.07441e-06	5.84538e-05	5.71096e-05	5.30369e-05	5.76447e-05	3.99395e-05	6.60888e-05	2.45997e-06	6.29151e-05	6.80762e-05	6.02805e-05	2.40678e-06
D3ZNW5	1.55594e-05	1.5101e-05	1.61933e-05	1.56513e-05	1.7984e-05	8.42176e-06	1.45845e-05	1.42958e-05	1.24271e-05	1.57468e-05	1.63251e-05	1.15892e-05
D3ZWG2	4.69972e-06	5.11707e-06	2.23697e-05	4.16247e-06	5.47739e-06	4.26219e-06	3.22034e-06	3.35139e-06	5.26141e-06	4.56994e-06	4.5577e-06	2.60635e-06
Q4QQV3	1.23327e-06	2.15297e-06	3.07529e-06	1.81302e-06	2.24367e-06	1.75065e-06	2.32679e-06	3.33588e-06	3.34225e-06	2.44816e-06	1.96177e-06	2.75964e-06
Q63692	6.74481e-06	8.27072e-06	7.73966e-06	5.51347e-06	8.38919e-06	4.92672e-06	9.07595e-06	3.54632e-06	5.25022e-06	9.31205e-06	7.33658e-06	4.96965e-06
P54900	4.19868e-06	4.20508e-06	2.00966e-06	4.06577e-06	3.9799e-06	3.73132e-06	4.16695e-06	1.4469e-06	1.3279e-06	3.86857e-06	2.44887e-06	5.3127e-11
Q4V8H5	3.8907e-06	3.79724e-06	2.79074e-06	4.06845e-06	2.58452e-06	1.75225e-06	2.69147e-06	3.43415e-06	2.35562e-06	4.12925e-06	3.06013e-06	1.27561e-06
A0A096MIX2	3.91639e-06	5.83031e-06	7.61561e-06	5.44566e-06	4.9886e-06	5.31911e-06	4.49495e-06	2.30904e-06	7.06186e-06	5.75281e-06	9.21787e-07	3.94899e-06
P24268	8.26291e-06	1.04272e-05	1.01765e-05	7.76961e-06	9.07052e-06	8.3136e-06	9.99591e-06	7.53925e-06	7.26802e-06	1.05678e-05	7.42858e-06	7.05482e-06
F1LMV9	3.89032e-06	4.83545e-06	3.24424e-06	4.18906e-06	3.26605e-06	2.76396e-06	2.78589e-06	2.86915e-06	2.20503e-06	3.34466e-06	3.67434e-06	2.65759e-06
P04041	1.3627e-06	3.03032e-06	2.99267e-06	9.1655e-07	2.59402e-06	1.42948e-06	3.68062e-06	1.89978e-10	2.59084e-06	3.43271e-10	1.79673e-06	1.31892e-06
Q8K3G3	7.18666e-07	1.5938e-06	1.05167e-06	1.0278e-06	9.25218e-07	1.50069e-06	1.47038e-06	1.9666e-06	1.31365e-06	8.23962e-07	1.28837e-06	1.37639e-06
F1LU71	1.18158e-05	1.279e-05	1.0702e-05	1.39789e-05	7.82068e-06	5.07547e-06	1.35125e-05	7.54298e-06	9.04179e-06	1.41335e-05	1.02442e-05	7.59041e-06
G3V647	1.20436e-06	1.68503e-06	1.72129e-06	4.15334e-07	1.69165e-06	7.98433e-07	1.62519e-06	1.78485e-06	2.18283e-10	1.37185e-06	1.51704e-06	2.41924e-06
D4ADE5	2.89308e-06	3.34479e-11	3.17057e-06	9.02383e-07	3.21919e-06	2.48995e-11	1.45878e-06	4.33611e-06	2.51784e-06	1.50388e-10	4.26164e-06	1.22626e-06
Q5D023	4.81929e-06	2.31167e-06	3.80341e-06	3.52954e-06	3.26818e-06	2.75922e-06	4.83519e-06	2.82012e-06	5.40561e-06	2.67544e-06	4.47086e-06	2.91756e-06
P97686-2	8.0337e-06	8.34039e-06	9.86845e-06	8.66584e-06	9.28638e-06	7.05228e-06	7.92732e-06	6.88468e-06	6.68933e-06	7.44868e-06	9.16379e-06	6.91488e-06
P63095	4.64855e-05	5.85087e-05	5.61639e-05	5.67783e-05	5.85911e-05	2.10934e-06	5.86492e-05	3.63323e-06	6.32474e-05	6.22949e-05	6.94902e-05	2.08389e-06
F1LSE6	4.85176e-06	3.98161e-06	5.86196e-06	4.44044e-06	4.24604e-06	2.81513e-06	3.9493e-06	3.79384e-06	4.44308e-06	5.47689e-06	4.38948e-06	3.86696e-06
A2VCX1	6.53441e-06	1.13971e-06	1.57088e-06	5.60754e-06	1.69223e-06	7.81172e-07	1.63002e-06	1.54703e-06	3.25418e-06	6.61966e-07	1.49614e-06	1.53428e-06
B0BND0	1.16531e-06	1.63067e-06	3.02485e-06	3.66526e-06	2.05311e-06	9.38718e-07	1.8787e-06	9.94972e-07	4.21222e-06	1.7893e-06	9.71479e-07	1.87363e-06
D3ZQ02	1.84192e-06	1.95991e-06	2.38168e-06	3.61887e-06	1.6449e-06	1.37309e-06	2.289e-06	3.3262e-06	2.14736e-06	4.11069e-06	3.24416e-06	1.55137e-06
F1M8H6	6.03317e-06	6.59983e-06	5.28959e-06	6.16827e-06	5.99031e-06	3.90664e-06	6.23926e-06	4.50827e-06	4.52343e-06	7.39013e-06	4.4477e-06	2.83466e-06
G3V8W9	2.59758e-10	2.77872e-06	3.08484e-06	1.25272e-06	2.91657e-06	1.31802e-06	1.71517e-11	7.30606e-11	1.04206e-10	2.29618e-06	1.8902e-06	1.08701e-10
Q68FP1-2	5.48669e-06	7.52091e-06	6.70113e-06	7.98491e-06	5.81011e-06	5.87519e-06	6.11779e-06	5.6209e-06	8.3143e-06	6.31982e-06	5.43475e-06	7.53149e-06
Q6AYS7	5.1647e-07	1.48587e-06	1.40548e-06	2.05096e-06	2.31766e-06	1.0403e-06	2.14458e-06	1.33691e-06	1.69277e-06	2.47702e-06	1.76262e-06	5.67894e-07
Q64057	3.52652e-06	4.79225e-06	2.47173e-06	4.85704e-06	4.22976e-06	1.72549e-06	4.77733e-06	4.66191e-06	2.95226e-06	3.07208e-06	4.57762e-06	1.58702e-06
P04785	3.64454e-06	3.89405e-06	4.34303e-06	3.53378e-06	4.20194e-06	9.29846e-06	4.0836e-06	4.23219e-06	3.13673e-06	4.78824e-06	4.44554e-06	3.68009e-06
D4A8C2	8.0337e-06	8.34039e-06	9.86845e-06	8.66584e-06	9.28638e-06	7.05228e-06	7.92732e-06	6.88468e-06	6.68933e-06	7.44868e-06	9.16379e-06	6.91488e-06
Q6AY09	1.31776e-05	1.26489e-05	1.01009e-05	1.24258e-05	1.29872e-05	9.90362e-06	1.41684e-05	1.20149e-05	4.3774e-06	1.37613e-05	1.11983e-05	5.90137e-06
Q63797	9.2085e-07	1.44634e-06	8.17338e-07	1.19983e-06	1.71911e-06	6.19258e-07	8.30072e-07	9.81328e-07	8.06555e-07	1.07113e-06	1.29294e-06	7.94947e-07
Q62829	5.77155e-06	8.36267e-06	5.7024e-06	4.1279e-06	5.66754e-06	4.34859e-06	9.78725e-06	7.79174e-06	5.66453e-06	4.00377e-06	9.66044e-06	6.28059e-06
Q8K3X8	9.97808e-06	7.67254e-06	1.26449e-05	2.25551e-06	2.87142e-10	2.29097e-12	8.50283e-06	1.95793e-06	7.85895e-06	1.14564e-05	1.45093e-11	7.2424e-06
D3ZHG2	3.66765e-06	2.51759e-06	1.65675e-06	3.34378e-06	3.11205e-06	2.26567e-06	3.02975e-06	1.87205e-06	3.33576e-06	3.31549e-06	1.98945e-06	1.22771e-06
D3ZZ21	6.63272e-06	6.32202e-06	1.01122e-05	6.43926e-06	6.25003e-06	4.98986e-06	6.74026e-06	6.81786e-06	6.87052e-06	5.79296e-06	6.66309e-06	4.35268e-06
D4A565	1.44899e-05	1.72717e-05	1.54314e-05	1.52123e-05	1.62037e-05	8.06267e-06	1.44819e-05	1.64318e-05	1.33811e-05	1.42529e-05	1.42226e-05	9.91057e-06
P19490	9.06327e-06	1.55141e-05	9.25059e-06	1.38736e-05	8.22057e-06	7.89798e-06	1.44197e-05	1.11687e-05	8.93273e-06	1.43562e-05	1.35279e-05	4.86717e-06
E9PTV9	0.00030917	0.000449223	0.000434334	0.000404663	0.00044431	8.13035e-05	0.000445561	0.000361572	0.000418257	0.00044934	0.000436635	0.000281772
F1M7V6	4.8977e-06	4.23558e-06	5.487e-06	6.07757e-06	4.29382e-06	2.44404e-06	4.00781e-06	3.90998e-06	5.03008e-06	4.5567e-06	5.84352e-06	2.05287e-06
P52555	9.29418e-06	8.24666e-06	7.42464e-06	7.87034e-06	6.52266e-06	3.98404e-06	8.7605e-06	5.03314e-06	7.31238e-06	9.14823e-06	8.55134e-06	4.70581e-06
P13697	5.03294e-06	2.78788e-06	4.31671e-06	9.30927e-07	2.66374e-06	2.52349e-06	4.01501e-06	4.22893e-06	4.44152e-06	3.02844e-06	3.57136e-06	2.76259e-06
F1LP57	2.9351e-06	3.98368e-06	4.01614e-06	4.14936e-06	3.91677e-06	3.87222e-06	3.21313e-06	3.57712e-06	4.08151e-06	3.49801e-06	5.45096e-06	2.99148e-06
F1LP91	3.97877e-06	5.873e-06	5.04043e-06	5.77101e-06	5.50115e-06	4.67443e-06	6.41149e-06	5.17197e-06	5.54312e-06	6.83198e-06	5.38631e-06	5.28918e-06
A0A096MJ42	6.3801e-06	7.15651e-06	7.26258e-06	6.69169e-06	7.61386e-06	4.3499e-06	6.89169e-06	4.44208e-06	4.6512e-06	6.56223e-06	6.43827e-06	6.22096e-06
Q5XI72	7.01708e-06	7.42304e-06	4.52021e-06	7.99122e-06	9.13864e-06	6.14349e-06	7.53416e-06	3.95277e-06	4.28541e-06	8.67436e-06	7.13134e-06	3.58284e-06
B0BMY7	4.18423e-06	6.1283e-06	4.16774e-06	5.60317e-06	5.92134e-06	2.9773e-06	5.09283e-06	4.37601e-06	4.58914e-06	5.79416e-06	5.60634e-06	2.81915e-06
B2GV73	2.01018e-05	2.32473e-05	1.64463e-05	2.06807e-05	1.43779e-05	1.8577e-05	2.00278e-05	1.21162e-05	1.86778e-05	1.68179e-05	1.14714e-05	1.51482e-05
P23928	7.56002e-07	1.27048e-10	3.67291e-11	2.27518e-06	1.87507e-06	1.00946e-06	1.2443e-06	1.38355e-06	2.90688e-06	1.25817e-06	1.49323e-06	5.44065e-07
G3V9R8	8.11733e-06	1.01445e-05	9.50668e-06	9.03769e-06	7.53157e-06	4.98214e-06	8.32945e-06	5.01292e-06	7.68098e-06	8.22659e-06	4.51628e-06	6.69449e-06
P41499	2.5673e-06	2.85304e-06	2.7238e-06	3.13582e-06	2.371e-06	1.73197e-06	2.78311e-06	1.74369e-06	3.22673e-06	2.71356e-06	2.66362e-06	2.11866e-06
Q5BJU7	1.08102e-05	1.2701e-05	9.79151e-06	1.10161e-05	1.08201e-05	9.69503e-06	1.12489e-05	8.41133e-06	9.11414e-06	1.05007e-05	1.24339e-05	7.50682e-06
P36970-2	3.24387e-06	3.51514e-06	6.26782e-06	3.23185e-06	2.72248e-06	1.77703e-06	2.56835e-06	2.73384e-06	2.90354e-06	3.22833e-06	2.84003e-06	2.44071e-06
Q64361	4.82664e-06	8.6339e-06	6.50413e-06	5.48057e-06	6.06046e-06	5.47205e-06	6.21381e-06	4.6357e-06	4.57035e-06	9.50554e-06	4.28559e-06	3.21403e-06
D4AE00	5.32569e-06	6.33125e-06	6.84964e-06	5.02437e-06	6.24455e-06	2.80726e-06	6.02033e-06	5.69507e-06	6.84801e-06	5.39025e-06	5.66177e-06	4.81079e-06
P62074	3.96697e-06	4.17835e-06	1.81944e-06	4.32876e-06	7.59543e-11	2.32565e-06	5.18616e-06	3.79834e-06	5.06545e-06	1.41048e-10	4.13641e-06	4.50238e-06
P62250	7.45642e-06	5.33951e-06	6.14354e-06	6.70928e-06	5.16292e-06	3.43158e-06	5.71373e-06	5.98529e-06	3.78694e-06	3.79591e-06	4.91254e-06	2.56368e-06
P04166	3.95772e-06	6.57023e-11	5.51841e-06	4.22545e-11	1.96811e-10	2.55073e-06	1.31101e-10	3.33015e-10	1.99542e-10	2.65897e-10	2.8629e-10	1.67703e-06
Q923W4	3.10115e-06	2.40533e-06	3.57991e-06	3.31868e-06	4.14816e-06	2.32067e-06	3.46216e-06	1.61072e-06	2.48685e-06	4.99843e-06	8.93743e-07	2.00725e-06
Q4KM98	4.79756e-06	4.09927e-06	1.79588e-06	4.34172e-06	7.8441e-06	1.19375e-06	3.4305e-06	4.75468e-06	3.38329e-06	5.14816e-06	2.25642e-06	2.68227e-06
Q56R17	1.54048e-06	1.83714e-06	3.10502e-06	2.81452e-06	1.45736e-06	2.04762e-06	2.70354e-06	9.83319e-07	2.45907e-06	1.64916e-06	1.73856e-06	2.24832e-06
P62882	3.00997e-06	7.32654e-06	6.07299e-06	4.95765e-06	6.05871e-06	5.50414e-06	4.81503e-06	4.66308e-06	5.47063e-06	7.25067e-06	5.62903e-06	1.42109e-06
B0BN52	1.49889e-05	1.77092e-05	1.9989e-05	1.41761e-05	1.34103e-05	9.89431e-06	1.41781e-05	1.3784e-05	1.38468e-05	1.49844e-05	1.54079e-05	1.13531e-05
G3V964	1.0032e-05	1.4768e-05	1.27296e-05	1.64705e-05	1.24885e-05	8.81038e-06	1.26502e-05	9.21825e-06	1.35845e-05	1.44204e-05	1.52791e-05	3.83255e-06
P97612	1.37669e-06	2.35136e-06	5.10665e-07	2.08674e-06	1.40175e-06	8.1731e-07	1.53764e-06	1.41358e-06	6.26511e-07	1.82326e-06	1.76571e-06	4.64992e-07
O54975	3.88393e-06	2.82941e-06	4.3854e-06	4.56455e-06	3.90306e-06	3.02776e-06	4.46874e-06	4.42528e-06	2.39092e-06	3.37324e-06	2.91786e-06	2.68631e-06
G3V6P2	2.46046e-05	2.66649e-05	2.1805e-05	2.492e-05	2.55315e-05	1.32388e-05	3.26324e-05	2.3423e-05	2.43495e-05	3.77151e-05	3.15941e-05	8.2046e-06
Q9QX80	4.80469e-06	1.87846e-06	1.81122e-06	1.47428e-06	1.77926e-06	1.28552e-06	1.0663e-05	1.26965e-06	8.52895e-06	6.81146e-06	5.02009e-06	2.15224e-06
Q9EPH8	6.84712e-06	8.49175e-06	9.85142e-06	7.7939e-06	8.66155e-06	5.09637e-06	9.42947e-06	8.63642e-06	7.40557e-06	8.5732e-06	8.55882e-06	7.04006e-06
D3ZAN3	5.10213e-06	6.1396e-06	5.28213e-06	3.77897e-06	5.63657e-06	3.35466e-06	4.54051e-06	4.737e-06	4.77411e-06	4.70367e-06	5.67541e-06	4.28497e-06
B5DFE0	3.44582e-06	3.81319e-06	1.89346e-06	3.45282e-06	3.48644e-06	1.84297e-06	3.82089e-06	2.74039e-06	1.7104e-06	3.81139e-06	2.85118e-06	2.29311e-06
Q5XII9	2.46667e-07	1.21072e-06	9.45158e-07	5.81355e-07	1.88846e-10	2.22197e-10	6.86873e-07	8.23574e-07	4.66436e-07	7.70256e-07	6.87491e-07	6.66319e-07
Q1WIM3	1.35375e-05	1.63367e-05	1.64734e-05	1.42716e-05	1.26529e-05	1.05483e-05	1.32883e-05	1.31092e-05	1.53327e-05	1.4054e-05	1.67834e-05	1.35909e-05
P02625	1.72945e-10	6.69965e-11	6.57731e-07	3.00142e-10	9.83983e-07	6.3283e-11	2.26281e-11	1.49532e-06	4.4238e-11	7.74989e-07	6.45486e-07	1.7318e-10
P18422	2.54842e-06	2.781e-06	3.70316e-06	1.91576e-06	2.75083e-06	2.62396e-06	2.96401e-06	1.41967e-06	4.40135e-06	1.88834e-06	2.96162e-06	1.88352e-06
M0R907	5.23775e-06	5.40872e-06	4.00196e-06	4.3599e-06	5.20707e-06	3.12231e-06	4.11388e-06	3.54425e-06	3.91686e-06	4.43999e-06	4.42866e-06	2.97507e-06
F1M0Z3	1.74509e-05	1.94263e-05	1.60015e-05	1.63583e-05	4.6367e-06	1.05287e-05	1.76249e-05	4.80398e-06	1.2771e-05	1.43731e-05	1.56491e-05	1.43896e-05
D3ZI16	1.51767e-06	4.03564e-06	1.5746e-06	1.40395e-06	1.53029e-06	6.39349e-07	1.74338e-06	1.72372e-06	1.1312e-06	1.56015e-06	2.32384e-06	7.75192e-07
P21775	8.71925e-07	1.00043e-06	7.21118e-07	1.61547e-06	2.24945e-07	6.07672e-07	5.96956e-07	9.39872e-07	5.1737e-07	2.15089e-12	1.18778e-06	6.18245e-07
D4A5J1	2.89766e-06	3.87854e-06	2.07372e-06	2.75869e-06	1.82936e-06	1.33016e-06	3.56671e-06	1.40659e-06	2.23079e-06	2.40372e-06	1.3901e-06	1.84064e-06
M0R584	1.15819e-05	1.03068e-05	8.22645e-06	8.03999e-06	1.05748e-05	4.17679e-06	1.16364e-05	8.11132e-06	5.52429e-06	9.63685e-06	6.94709e-06	7.51583e-06
P31977	6.91699e-06	9.09323e-06	7.26592e-06	8.27073e-06	7.38011e-06	3.2126e-06	9.01411e-06	5.94209e-06	8.5574e-06	8.81442e-06	7.08802e-06	5.23184e-06
B1WBS4	4.67349e-06	4.6663e-06	2.31246e-06	1.8378e-06	4.71889e-06	1.89547e-06	4.14407e-06	3.00532e-06	1.88188e-06	3.2254e-06	2.3368e-06	2.94278e-06
Q7TQ85	9.79896e-06	8.69193e-06	9.2613e-06	9.48898e-06	9.15325e-06	7.48018e-06	9.24738e-06	7.67121e-06	8.4963e-06	1.05639e-05	8.76733e-06	8.43595e-06
D3ZNK1	9.3134e-07	2.90721e-06	1.13793e-06	8.76862e-11	1.73401e-10	2.06567e-10	1.23777e-06	1.37458e-07	1.09202e-06	1.30772e-06	2.98401e-10	4.69034e-07
P13852	1.23224e-05	1.36758e-05	1.18692e-05	1.68983e-05	1.30896e-05	1.06123e-05	1.59276e-05	1.47367e-05	1.37571e-05	1.50997e-05	1.89688e-05	1.14146e-05
F1LMW7	1.84626e-05	1.76064e-05	1.50259e-05	2.02055e-05	1.8187e-05	1.06237e-05	2.26396e-05	9.46652e-06	1.97735e-05	2.20646e-05	1.69652e-05	1.42573e-05
Q6AXW1-2	9.59675e-11	2.87284e-10	1.23065e-10	5.05247e-11	1.68877e-10	4.75252e-07	1.54524e-10	2.267e-12	1.6198e-10	1.12362e-06	5.04916e-11	1.08098e-10
A0A096MJ90	2.07393e-05	2.26625e-05	1.99256e-05	2.9162e-05	2.38432e-05	1.73855e-05	2.96407e-05	1.14154e-05	1.60962e-05	1.74263e-05	2.18703e-05	1.86583e-05
O35180	1.69835e-06	2.44785e-06	1.32465e-06	2.58088e-06	2.98629e-06	1.70938e-06	2.79733e-06	1.97285e-06	7.74365e-07	2.41583e-06	2.33232e-06	1.41541e-06
Q6PCT3	2.11241e-06	2.12982e-06	1.59275e-06	2.22778e-06	2.02619e-06	1.756e-06	2.06233e-06	2.4977e-10	2.24936e-10	2.50053e-06	1.44429e-06	1.11531e-06
Q9QZM5	7.60852e-06	9.11834e-06	8.75346e-06	9.39678e-06	8.62534e-06	6.14721e-06	8.21952e-06	5.20413e-06	7.45293e-06	8.16006e-06	8.42824e-06	6.66408e-06
D3Z8D7	6.38966e-06	4.44204e-06	6.42486e-06	5.75366e-06	2.40918e-06	1.07917e-05	1.10872e-10	4.95324e-06	6.18116e-06	3.93112e-06	3.4291e-06	6.88085e-06
Q62634	1.4783e-05	2.2668e-05	2.84959e-05	1.80307e-05	2.74901e-05	1.90618e-05	1.99933e-05	1.89079e-05	1.73939e-05	2.12831e-05	2.25125e-05	1.13556e-05
B2RZ27	1.50677e-05	1.11646e-05	1.00659e-05	1.33576e-05	1.55081e-05	1.23245e-05	1.13278e-05	1.37907e-05	1.26172e-05	8.16427e-06	1.60008e-05	1.22298e-05
M0R785	1.3413e-10	1.12327e-06	1.09408e-06	2.71905e-10	2.47139e-06	2.07941e-10	1.1434e-10	2.74504e-06	2.24752e-10	3.33349e-10	3.00044e-06	9.83879e-07
B5DF41	3.50053e-06	2.79123e-06	2.82937e-06	3.01842e-06	2.9647e-06	2.26986e-06	2.66996e-06	3.29694e-06	2.00273e-06	2.82215e-06	2.55437e-06	2.84093e-06
D3ZJ77	1.66768e-06	2.22018e-06	2.12525e-06	1.91761e-06	1.79792e-06	4.30207e-07	2.29833e-06	1.52904e-06	2.10794e-06	2.13135e-06	1.41093e-06	1.05904e-06
Q4V8I9	3.95569e-06	4.48843e-06	4.2234e-06	4.21042e-06	4.85749e-06	2.05157e-06	4.81071e-06	3.31507e-06	3.51493e-06	4.78771e-06	4.53526e-06	2.69556e-06
D3ZWL6	1.69247e-05	2.19458e-05	1.86327e-05	1.67844e-05	1.74414e-05	9.13121e-06	1.97422e-05	1.13383e-05	1.13379e-05	1.85383e-05	2.143e-05	8.24426e-06
Q5FVM4	3.21819e-06	4.0994e-06	3.32698e-06	4.50124e-06	4.54334e-06	2.89568e-06	4.81923e-06	3.50839e-06	3.59717e-06	5.81692e-06	5.62828e-06	3.38477e-06
P31596-2	0.000209458	0.00017761	0.00022553	0.000234702	0.000154027	0.000183211	0.000221375	0.000173818	0.000186661	0.000253503	0.000247907	0.000204229
F1LMZ8	2.25494e-06	3.16621e-06	2.32821e-06	2.78047e-06	2.78213e-06	1.55453e-06	2.50827e-06	2.09506e-06	2.40359e-06	2.29646e-06	2.42707e-06	1.72223e-06
P97710	1.51507e-05	1.66004e-05	1.46463e-05	1.96559e-05	1.71176e-05	1.13311e-05	1.80532e-05	1.23488e-05	1.8295e-05	2.03364e-05	1.85432e-05	1.04325e-05
D3ZEI4	6.72515e-06	7.78524e-06	5.36061e-06	8.04842e-06	6.74599e-06	4.50789e-06	6.02461e-06	5.39355e-06	7.14271e-06	7.50765e-06	8.4062e-06	2.66162e-06
O35112	5.61775e-06	6.32277e-06	5.04326e-06	5.54377e-06	4.1199e-06	4.26786e-06	6.47207e-06	6.34049e-06	6.31715e-06	4.75894e-06	6.36723e-06	2.44768e-06
D3ZSL2	4.62494e-06	6.23483e-06	5.36347e-06	5.39302e-06	5.35823e-06	3.20496e-06	5.66677e-06	5.30988e-06	4.90045e-06	5.11109e-06	5.24684e-06	3.13168e-06
Q99MI5	1.23448e-06	1.33346e-06	1.9028e-06	1.05751e-06	1.84073e-06	7.33709e-07	1.7243e-06	8.97149e-07	1.99814e-06	1.08664e-06	1.73098e-06	8.91327e-07
Q5M9H4	3.02449e-05	2.75267e-05	1.793e-05	2.50041e-05	2.61903e-05	2.74223e-05	2.80967e-05	2.89727e-05	3.24909e-05	3.15427e-05	4.15164e-05	2.42473e-05
Q52NK0	2.49374e-06	2.10447e-06	2.13719e-06	2.76433e-06	1.63013e-06	1.07191e-10	2.72621e-06	1.51938e-06	2.16218e-06	1.96165e-06	1.05398e-06	1.95737e-06
P61078	1.452e-06	3.3049e-06	1.31248e-05	1.55491e-05	3.20443e-06	1.92101e-10	2.54166e-06	1.46434e-05	1.07343e-10	4.16474e-06	2.42134e-06	1.11962e-05
Q4KMA2	5.85842e-06	7.35637e-06	7.02492e-06	6.20978e-06	3.92455e-06	3.91719e-06	5.43904e-06	4.7727e-06	5.60841e-06	5.35384e-06	7.06246e-06	5.95075e-06
B4F7A9	4.90165e-06	1.82396e-05	1.81014e-06	9.09216e-06	1.43007e-05	4.14468e-11	8.68322e-06	1.26552e-05	5.72188e-06	2.39937e-05	2.23928e-05	5.90866e-07
Q9EQS0	8.35802e-06	8.97611e-06	8.45678e-06	9.13835e-06	7.86161e-06	4.43106e-06	1.11344e-05	2.62223e-06	7.83655e-06	1.14307e-05	7.23993e-06	5.2731e-06
B5DFN4	3.48402e-07	1.50631e-10	3.61776e-06	2.00837e-10	2.83063e-06	2.64089e-06	2.35567e-06	1.57289e-06	4.26809e-06	1.55213e-10	2.24645e-06	2.4213e-06
P62859	1.42648e-10	1.81798e-05	1.95818e-10	1.56021e-05	2.76484e-10	2.10625e-10	5.06025e-11	2.277e-10	1.27532e-10	1.28414e-10	1.00538e-05	9.67395e-06
F1LN92	3.68611e-06	4.39507e-06	4.0173e-06	4.27781e-06	4.07576e-06	3.16762e-06	4.63861e-06	3.82511e-06	4.60643e-06	4.54797e-06	3.56832e-06	3.00451e-06
Q5XI86	1.00237e-06	7.50913e-07	1.76108e-10	8.01737e-07	8.59898e-07	1.07505e-10	2.09519e-11	2.5497e-10	1.28612e-10	8.08038e-12	2.54292e-10	7.42884e-11
G3V7X2	1.46365e-06	2.80266e-06	3.35113e-06	2.03472e-06	2.12645e-06	2.06692e-06	3.41961e-06	1.70386e-06	1.7411e-06	3.08219e-06	2.52389e-06	1.78333e-06
F1LSW7	3.86725e-06	6.12491e-06	5.71225e-06	1.56135e-06	7.07574e-06	5.64752e-06	4.91373e-06	9.76732e-06	2.40565e-06	4.18696e-06	6.91892e-06	1.43919e-06
G3V8B6	3.40035e-06	2.81699e-06	3.0328e-06	2.97635e-06	3.46811e-06	1.39056e-06	4.37831e-06	2.09333e-06	1.71277e-06	5.31683e-06	2.18246e-06	1.59898e-06
D4AEP0	2.30248e-06	1.78278e-06	1.38941e-06	2.13419e-06	1.92593e-06	1.88927e-06	2.41224e-06	1.56599e-06	1.19278e-06	2.97312e-06	1.5627e-06	5.35416e-07
Q76GL9	3.52454e-06	6.02347e-06	1.03571e-06	5.4895e-06	1.81256e-06	2.17272e-06	5.18677e-06	7.02657e-06	8.70611e-06	5.46451e-06	4.03105e-06	1.67059e-06
F1LRE1	1.09892e-06	2.45075e-06	2.15482e-06	1.51526e-06	1.80319e-06	5.90324e-07	1.79551e-10	5.17941e-07	1.88458e-06	2.53767e-06	2.24421e-06	4.98266e-08
B4F7A3	1.15449e-06	1.23681e-06	2.28638e-06	1.65059e-06	1.49549e-06	2.21392e-06	1.90761e-06	1.02564e-06	2.57138e-06	2.14442e-06	8.2412e-07	2.60266e-06
Q9QUR2-2	4.2745e-06	2.57949e-06	5.71349e-06	3.06726e-06	2.79138e-06	7.32706e-07	1.8532e-06	3.93069e-06	1.29493e-06	2.65042e-06	3.87063e-06	9.7785e-11
P19490-2	9.06327e-06	1.54968e-05	8.97861e-06	1.35669e-05	8.22057e-06	5.75946e-06	1.4161e-05	1.01724e-05	8.06116e-06	1.35014e-05	1.30604e-05	4.86717e-06
P50503	7.03559e-06	7.38825e-06	5.03716e-06	6.44332e-06	8.12255e-06	7.19383e-06	9.25344e-06	7.38015e-06	5.45889e-06	8.55341e-06	9.89872e-06	2.59103e-06
P27274	2.09501e-10	1.20922e-05	9.63962e-06	7.12368e-06	1.06515e-05	5.84562e-06	3.02856e-06	8.68416e-06	5.22256e-06	7.39554e-06	9.71337e-06	5.12043e-06
M0RBL8	9.91032e-06	6.8309e-06	7.64032e-06	7.80374e-06	9.45256e-06	7.10208e-06	1.15547e-05	4.77487e-06	1.13653e-05	8.52559e-06	5.58759e-06	5.28649e-06
D3ZM21	3.14064e-06	8.66832e-07	1.16207e-06	2.78184e-06	9.14225e-07	3.0444e-06	7.58911e-07	1.45398e-06	2.90383e-06	2.98484e-06	1.40023e-06	3.37695e-06
Q07009	4.63824e-06	4.02334e-06	5.57513e-06	5.1074e-06	4.95782e-06	2.71722e-06	4.7616e-06	3.56918e-06	3.19619e-06	5.55478e-06	3.69178e-06	3.43914e-06
Q6P4Z9	2.95741e-06	3.76632e-06	2.82496e-06	1.44737e-10	3.65056e-06	7.0697e-07	3.67273e-06	1.10139e-06	1.61226e-06	3.23876e-06	3.82149e-06	8.3906e-07
B0BNM1	4.60454e-06	5.49655e-06	7.47523e-06	5.8984e-06	4.12969e-06	2.17156e-06	6.37916e-06	6.98953e-07	3.83634e-06	5.95891e-06	4.86433e-06	3.00408e-06
P00787	4.934e-06	6.58519e-06	5.81674e-06	5.78358e-06	5.12362e-06	4.28409e-06	5.12968e-06	3.06581e-06	6.564e-06	5.65048e-06	5.92447e-06	5.59823e-06
A0A096MJN2	1.20365e-06	2.87762e-06	1.02996e-06	4.83017e-07	3.65166e-06	2.09759e-06	3.18595e-06	8.2627e-07	6.44485e-07	3.85491e-06	1.48868e-06	1.83756e-06
F1LX22	7.39103e-06	4.93398e-06	4.74438e-06	8.51142e-06	8.67208e-06	3.38255e-06	8.61192e-06	3.81762e-06	4.63062e-06	9.3485e-06	5.80477e-06	2.03356e-06
P62850-2	3.06401e-06	3.22688e-06	4.63482e-06	2.38747e-06	3.45685e-06	2.74147e-06	1.86727e-06	2.72784e-06	2.35651e-06	1.70479e-06	2.99501e-06	2.51515e-06
Q62848	4.07913e-06	5.12714e-06	4.35986e-06	4.91184e-06	4.85748e-06	3.68363e-06	5.0635e-06	3.79288e-06	4.21331e-06	5.86975e-06	4.57343e-06	2.36945e-06
Q4G079	1.23987e-06	2.93556e-06	9.17178e-07	1.57511e-06	2.30838e-06	6.05511e-07	2.14103e-06	1.84537e-06	2.43875e-06	1.87496e-06	7.09448e-07	9.34585e-07
Q6AY21	2.57526e-06	3.01408e-06	2.83327e-06	3.27709e-06	2.90259e-06	3.6176e-06	3.76725e-06	3.26282e-06	3.00457e-06	3.34556e-06	3.35331e-06	2.61419e-06
M0RC99	9.91188e-06	1.07249e-05	1.3932e-05	1.18908e-05	1.08647e-05	1.05212e-05	1.10017e-05	1.06526e-05	8.98253e-06	1.10897e-05	1.18149e-05	2.34952e-06
P63090	5.85225e-06	6.61109e-07	7.71015e-06	7.36066e-11	5.78149e-11	2.8678e-06	2.54558e-10	1.07782e-10	1.09986e-10	2.44155e-10	9.88177e-06	1.12366e-10
F1LNN1	4.23899e-06	6.85007e-06	2.61145e-06	4.40876e-06	7.07023e-06	2.0129e-06	4.61245e-06	3.6687e-06	4.71459e-06	4.82794e-06	1.13391e-06	1.44863e-06
D3ZI60	7.47333e-06	5.61611e-06	8.45759e-06	6.87178e-06	6.64093e-06	7.14803e-06	5.01766e-06	5.97025e-06	4.23136e-06	4.71987e-06	8.54959e-06	6.57412e-11
O89035	1.7563e-06	9.86562e-07	1.7111e-10	1.77582e-06	2.77089e-06	6.59496e-07	9.92247e-07	1.80437e-06	1.06391e-06	2.0372e-06	2.42202e-06	1.31984e-06
Q99JD4	2.97548e-06	2.88195e-06	3.47284e-06	3.00131e-06	3.2748e-06	3.5077e-06	2.68217e-06	2.28331e-06	4.91501e-06	3.01198e-06	2.70372e-06	1.86191e-06
G3V6V1	6.48861e-06	6.49542e-06	6.86901e-06	6.33502e-06	4.15755e-06	2.31984e-06	6.86808e-06	5.98048e-06	5.86166e-06	6.78518e-06	6.48908e-06	3.96546e-06
Q5XIM5	2.98565e-06	1.89761e-06	3.78274e-06	2.89003e-06	3.39936e-06	3.90849e-06	1.92769e-06	1.57569e-06	4.08282e-06	2.60797e-06	1.5391e-06	4.09838e-06
Q6AYT7	2.63395e-06	2.47819e-06	2.25051e-06	2.05852e-06	2.49804e-06	1.433e-06	2.14096e-06	2.34237e-06	1.09906e-06	1.69891e-06	2.61737e-06	1.49491e-06
B5DFI9	1.73671e-06	9.84713e-06	2.5958e-06	1.77779e-06	2.24974e-06	9.20558e-07	6.81249e-07	1.30365e-06	1.60208e-06	1.52892e-06	1.26234e-05	2.17217e-06
D3ZHI9	3.49977e-06	2.23062e-06	2.38412e-06	2.13138e-06	1.84907e-06	1.6622e-06	3.33361e-06	1.60296e-06	3.25976e-06	2.4133e-06	3.07317e-06	2.63712e-06
P56603	1.0208e-05	1.41035e-05	1.3185e-05	1.26995e-05	1.11474e-05	1.13424e-05	1.28105e-05	1.0058e-05	1.07632e-05	1.19103e-05	1.33812e-05	1.25027e-05
D3Z900	8.17482e-07	2.07669e-06	1.51945e-06	1.3168e-06	1.47124e-06	1.24959e-06	1.63917e-06	1.40783e-06	1.29976e-06	1.60619e-06	1.80706e-06	1.75704e-06
G3V816	3.28578e-07	1.76262e-06	1.61487e-06	1.57477e-10	1.31895e-10	2.10123e-06	1.58656e-06	1.79243e-10	1.77044e-10	1.49457e-06	3.46476e-06	8.76512e-11
Q05140-2	2.65675e-05	2.52879e-05	2.96677e-05	2.26771e-05	2.77849e-05	2.34226e-05	2.43536e-05	2.35355e-05	2.36216e-05	2.35254e-05	2.98343e-05	1.76273e-05
P12007	6.57034e-06	8.55579e-06	8.05084e-06	8.20559e-06	7.49234e-06	6.2493e-06	7.77369e-06	8.54061e-06	5.12249e-06	8.90661e-06	8.64537e-06	5.47276e-06
Q64542-3	2.7316e-05	2.48589e-05	2.17165e-05	2.73678e-05	2.71995e-05	2.62648e-05	2.16216e-05	2.55404e-05	3.16457e-05	1.97056e-05	3.04946e-05	2.42646e-05
B5DFB2	3.44127e-06	1.391e-06	3.01034e-06	1.93736e-06	1.40732e-06	1.84526e-06	2.36376e-06	7.15637e-07	2.95331e-06	2.064e-06	2.38113e-06	2.34348e-06
D4A720	6.71673e-06	6.28824e-06	1.7745e-06	6.28167e-06	5.98529e-06	3.87739e-07	8.04321e-06	1.1277e-06	1.25586e-06	7.46873e-06	2.70111e-06	6.45839e-07
Q68FX9	1.65267e-06	2.3384e-06	2.08093e-06	2.44051e-06	2.38796e-06	1.32645e-06	2.85487e-06	1.41186e-06	1.87813e-06	2.2153e-06	2.7627e-06	1.54573e-06
Q9WVB1	1.10656e-05	6.01253e-05	5.12915e-05	4.29629e-05	1.26384e-05	4.50057e-06	4.71064e-05	4.09328e-05	4.36677e-05	4.67739e-05	4.80306e-05	4.14987e-05
Q6PCT9	1.296e-06	7.11977e-06	3.33015e-06	2.02215e-06	1.82752e-06	2.24521e-06	6.46031e-06	3.33357e-06	3.26047e-06	2.07968e-06	3.53823e-06	2.25637e-06
B0BMX3	2.56003e-06	1.72411e-06	4.88614e-06	1.57599e-06	1.03852e-06	4.97467e-13	1.88031e-06	9.84851e-07	2.39804e-11	1.53009e-06	1.79659e-06	1.71805e-10
Q8K3M6	3.29184e-06	4.74679e-06	3.784e-06	3.43022e-06	1.83388e-06	4.75138e-06	3.09935e-06	7.9147e-07	3.08723e-06	5.0812e-06	4.51182e-06	3.3153e-06
Q5M9F7	1.99879e-06	1.62708e-06	8.99232e-11	1.46693e-06	1.89198e-06	1.18587e-06	1.56435e-06	1.76303e-07	2.14227e-10	1.5496e-06	8.13975e-07	3.5647e-07
M0RC08	6.33121e-06	6.99854e-06	4.86181e-06	6.47958e-06	5.20049e-06	5.15269e-06	6.44303e-06	4.77828e-06	4.73012e-06	6.94453e-06	8.17298e-06	4.56665e-06
D3ZFY8	1.58106e-05	1.84097e-05	2.06784e-05	1.59383e-05	9.13155e-06	6.67472e-06	1.76348e-05	1.33886e-05	9.4129e-06	1.79233e-05	1.34472e-05	4.99473e-06
A0A0A0MXY9	5.66503e-06	3.65692e-06	4.87559e-06	7.65106e-06	8.84522e-06	4.33283e-06	8.23164e-06	7.70907e-06	4.27349e-06	7.14243e-06	1.55011e-05	2.19245e-06
G3V6S3	2.1005e-06	1.59093e-06	2.64987e-06	3.27549e-06	2.73482e-11	2.10159e-06	2.12812e-06	1.48567e-06	2.02239e-06	3.632e-06	3.27255e-06	1.43761e-06
A2RUW1	3.92387e-06	2.6733e-06	5.22045e-06	2.64496e-06	6.74704e-06	1.65233e-06	6.66318e-06	2.75675e-06	2.45495e-06	2.75075e-06	2.8721e-06	3.58677e-06
F1LN18	2.33799e-06	3.79202e-06	2.65184e-06	2.03638e-06	3.25336e-06	1.29288e-06	2.7649e-06	2.1952e-06	3.01088e-06	2.74779e-06	3.17929e-06	1.21792e-06
D4AE41	9.38087e-06	7.12706e-06	2.10489e-06	7.96417e-06	7.77847e-06	3.37884e-06	9.36288e-06	3.46237e-06	9.73449e-06	5.88395e-06	6.27924e-06	1.83734e-06
Q8VHK7	5.51424e-07	2.11759e-06	1.25339e-06	3.21452e-06	4.27962e-06	2.46957e-07	2.41176e-06	7.01768e-11	5.73808e-07	3.82117e-06	2.07608e-10	1.25617e-10
P84100	7.97277e-06	5.2377e-06	7.06001e-06	7.68552e-06	6.89264e-06	8.50991e-06	8.04314e-06	6.21583e-06	7.20191e-06	4.90747e-06	4.48875e-06	8.55548e-06
F1M269	6.30914e-06	2.07403e-05	1.68022e-05	3.20304e-06	1.85632e-05	2.60924e-05	1.9496e-05	1.70137e-05	1.42812e-05	2.17354e-05	1.66748e-05	1.38977e-05
P00388	1.42043e-06	3.49718e-06	3.13487e-06	1.93882e-06	2.87909e-06	2.51037e-06	2.72975e-06	2.8317e-06	2.64021e-06	3.60961e-06	3.45004e-06	2.00583e-06
D3ZCI5	7.31283e-07	1.47229e-06	9.35632e-07	3.01388e-10	2.79631e-10	9.23337e-07	2.84885e-06	2.07585e-06	2.21728e-06	3.09263e-11	1.09121e-06	1.99512e-06
P0C6S7-3	9.9325e-06	1.02192e-05	7.57717e-06	9.38288e-06	8.90518e-06	6.83521e-06	9.29411e-06	8.36269e-06	6.58715e-06	9.2232e-06	9.25121e-06	5.69046e-06
R9PXR2	9.73714e-07	2.25594e-10	1.58061e-10	7.08187e-11	2.06854e-10	1.69139e-10	1.73267e-06	3.16363e-10	7.72498e-11	5.57682e-11	3.02282e-06	2.1129e-10
A0A096P6L5	3.01706e-06	2.97699e-06	2.56505e-06	3.325e-06	2.43491e-06	2.77373e-06	4.22791e-06	6.13424e-07	3.64773e-06	3.38242e-06	3.00199e-06	1.27899e-06
Q924S5	2.6176e-06	5.40434e-06	2.92423e-06	3.21755e-06	3.21193e-06	1.90879e-06	3.03453e-06	2.86339e-06	2.54067e-06	3.66858e-06	2.69665e-06	2.91066e-06
Q5BJU0	1.7312e-06	2.77421e-06	2.06048e-06	2.70867e-06	2.14081e-06	1.44105e-06	2.33358e-06	1.95604e-06	2.32666e-06	3.26791e-06	2.13726e-06	1.82263e-10
D3ZAJ5	3.54676e-06	2.8865e-06	3.86268e-06	3.66126e-06	3.38817e-06	9.79959e-06	4.3756e-06	3.53296e-06	3.64718e-06	3.09207e-06	3.8915e-06	3.38322e-06
Q5FVC2	2.79493e-06	2.84489e-06	2.8543e-06	2.45049e-06	2.436e-06	2.33856e-06	2.66507e-06	2.5804e-06	2.3154e-06	2.22767e-06	3.42583e-06	1.89576e-06
G3V9N1	2.02596e-06	1.56298e-06	3.74345e-06	1.98961e-06	1.59948e-06	2.31742e-06	1.9925e-06	1.73274e-06	1.80291e-06	2.46465e-06	2.42186e-06	1.98785e-06
Q6AXS5	5.85624e-06	3.4042e-06	5.32608e-06	4.24416e-06	6.88022e-07	5.1002e-06	4.54457e-06	4.50564e-06	5.44549e-06	5.4019e-06	9.92289e-06	7.38388e-06
Q5XIG4	1.21023e-06	1.88722e-06	2.85046e-06	2.6784e-10	1.10246e-06	1.66722e-06	1.42698e-06	1.15818e-06	2.27373e-06	5.07688e-11	3.46619e-10	3.08294e-06
Q8K4Y5	7.33402e-06	8.46082e-06	8.34781e-06	7.45714e-06	7.01316e-06	4.03379e-06	7.46204e-06	6.21294e-06	7.34691e-06	7.48371e-06	7.68587e-06	4.03393e-06
P43138	2.73132e-06	2.16137e-06	7.67355e-07	2.44908e-06	2.53418e-06	1.51706e-06	3.02741e-06	1.32102e-06	1.82683e-06	3.05989e-06	2.68867e-06	9.93871e-07
F1M9A2	9.31657e-06	1.12505e-05	9.91331e-06	1.18653e-05	1.02517e-05	8.19461e-06	1.02597e-05	8.81734e-06	1.08216e-05	1.15015e-05	1.22115e-05	7.16401e-06
P26453-2	1.18194e-05	1.34727e-05	1.35738e-05	1.4861e-05	1.08473e-05	7.24094e-06	1.28501e-05	7.78386e-06	1.5351e-05	1.58102e-05	1.61423e-05	5.81546e-06
Q3ZAU6	6.63391e-06	6.34657e-06	5.36018e-06	7.40509e-06	5.75845e-06	6.31202e-06	6.91977e-06	5.85217e-06	3.83434e-06	5.87083e-06	6.00903e-06	3.00941e-06
Q5XIU9	5.63271e-06	4.61241e-06	4.57795e-06	4.52624e-06	4.44852e-06	7.91416e-06	5.19796e-06	1.58501e-06	3.63223e-06	5.03763e-06	4.94377e-06	3.5105e-06
D3ZZK1	6.12495e-06	4.49145e-06	2.77594e-06	8.39881e-06	6.93503e-06	6.3578e-06	6.01898e-06	5.46971e-06	5.29682e-06	7.11325e-06	6.60582e-06	6.88561e-06
Q9R1T5	1.84463e-10	1.04255e-11	1.6347e-06	9.19226e-11	9.84186e-07	1.47761e-10	9.98208e-07	1.20434e-10	2.21861e-06	1.74629e-10	2.94364e-10	1.82945e-10
P60203	0.00042322	0.000618894	0.000677265	0.000970283	0.000623149	0.000230381	0.000637222	0.000496335	0.000706754	0.000581112	0.000554257	6.58465e-06
Q5I0D5	2.77389e-06	3.26444e-06	2.64426e-06	2.23645e-06	3.73983e-06	2.19202e-06	2.05888e-06	3.20844e-06	2.20707e-06	2.68351e-06	1.88627e-06	7.89421e-07
Q6AYT3	2.57275e-06	2.71773e-06	1.86671e-06	2.75402e-06	3.39092e-06	1.69429e-06	2.5342e-06	2.20894e-06	1.62051e-06	3.15523e-06	2.6414e-06	1.02387e-06
Q64560	3.98525e-06	4.61647e-06	5.24961e-06	5.72145e-06	3.25513e-06	1.86765e-06	5.73544e-06	2.90661e-06	4.70782e-06	3.65176e-06	3.79705e-06	2.95258e-06
P0C5H9	2.25846e-06	3.40873e-06	2.39381e-06	2.47584e-06	3.0002e-06	2.97891e-06	2.73246e-06	3.53653e-07	3.5379e-06	3.05626e-06	1.01406e-10	1.87277e-06
D3ZFB6	1.12575e-05	5.32611e-06	7.67733e-11	1.14826e-05	6.54409e-06	3.89726e-11	7.2468e-06	6.84099e-06	8.62544e-06	5.33114e-06	1.36048e-05	6.85384e-06
Q5FWY5	4.12545e-11	2.58298e-06	2.41045e-06	1.28321e-10	1.18544e-06	1.28175e-07	2.69176e-06	2.37165e-06	2.17447e-06	2.28498e-10	1.85768e-06	1.05579e-06
Q9QYW3	2.50092e-06	5.34072e-06	4.64603e-06	3.74664e-06	4.33893e-06	2.20625e-06	3.96039e-06	2.97408e-06	3.42271e-06	3.96573e-06	4.03866e-06	2.22795e-06
Q9QZA2	2.84173e-06	2.35846e-06	2.23938e-06	3.00055e-06	3.29824e-06	1.27976e-06	3.4772e-06	3.15486e-06	2.08237e-06	3.34115e-06	3.52115e-06	1.64695e-06
F1LPK7	3.20708e-06	2.47263e-06	2.65529e-06	3.11982e-06	2.60816e-06	1.14848e-06	2.87905e-06	2.12867e-06	2.86906e-06	2.87885e-06	2.31669e-06	1.66461e-06
Q63100-3	4.73202e-06	4.13329e-06	3.86338e-06	3.65517e-06	4.53125e-06	4.66014e-06	4.37289e-06	3.21909e-06	5.35843e-06	5.011e-06	3.75499e-06	3.77741e-06
D3ZF07	5.92217e-06	4.56658e-06	8.45759e-06	5.43904e-06	7.31052e-06	7.14803e-06	4.36174e-06	5.51834e-06	4.23136e-06	4.10994e-06	5.3194e-06	2.10005e-10
B0K008	2.82786e-06	6.84058e-11	2.02271e-06	2.22764e-06	2.91006e-06	4.11547e-06	3.55656e-06	1.6134e-10	4.14887e-06	2.75045e-06	2.97022e-06	2.84126e-11
Q499P2	1.50118e-06	1.22373e-06	2.3357e-06	2.10079e-06	2.23124e-06	8.6175e-07	1.5857e-06	1.42143e-06	2.34892e-06	1.11175e-06	1.21291e-06	9.14357e-07
Q02563	2.958e-05	3.01257e-05	2.40003e-05	2.30805e-05	3.0874e-05	2.6287e-05	2.57112e-05	2.40569e-05	2.5269e-05	3.11572e-05	3.02643e-05	2.25894e-05
D4ABI6	1.84845e-06	1.25105e-06	2.43051e-06	1.74245e-06	2.09958e-10	1.57393e-06	2.72313e-06	1.88894e-06	5.18794e-06	2.14559e-06	2.85552e-06	4.75694e-06
D3ZE17	3.68038e-06	3.26592e-06	4.16764e-06	3.10385e-06	3.12997e-06	2.74531e-06	6.21581e-06	3.5017e-06	1.30069e-06	5.88072e-06	4.53503e-06	1.767e-06
D3ZUI1	2.60394e-10	4.86925e-07	1.9353e-10	1.28828e-06	1.27474e-10	3.77682e-11	9.15671e-11	2.21799e-10	7.97433e-12	4.25242e-07	2.17128e-10	1.49538e-10
F1M585	7.82112e-06	8.12199e-06	8.56489e-06	9.05425e-06	9.01862e-06	6.19228e-06	8.22101e-06	7.34247e-06	8.34392e-06	7.62465e-06	8.43252e-06	6.56866e-06
B2RZD4	3.1227e-06	1.633e-06	9.89347e-06	1.78487e-06	1.503e-06	9.43768e-06	5.21351e-06	4.70955e-06	1.09032e-10	1.76265e-06	7.08927e-06	1.75783e-10
G3V9T7	3.92028e-06	4.24755e-06	3.68053e-06	4.31806e-06	3.94839e-06	2.62698e-06	4.2062e-06	3.66066e-06	3.52303e-06	4.62058e-06	3.40147e-06	1.21027e-06
Q5XFX0	1.18092e-05	5.16262e-06	8.64475e-06	1.1331e-05	1.28342e-05	6.91853e-06	7.77508e-06	8.12143e-06	1.12487e-05	9.56596e-06	1.28432e-05	6.85438e-06
Q63564	1.64986e-05	2.90924e-05	2.90442e-05	2.01847e-05	2.05532e-05	1.99462e-05	1.90908e-05	1.58473e-05	1.93073e-05	2.11637e-05	2.14135e-05	2.03906e-05
Q5VLR5	2.35747e-06	2.51515e-06	3.64029e-06	2.24183e-06	2.63603e-06	2.61282e-06	3.10361e-06	1.73394e-06	1.86955e-06	3.17035e-06	2.23424e-06	2.56134e-06
Q4V8E2	1.07861e-06	1.91939e-06	8.71505e-07	1.01642e-06	1.37375e-06	7.74537e-07	1.77223e-06	1.97879e-10	9.51188e-07	2.12642e-06	2.12507e-06	2.78097e-07
G3V6F4	2.97921e-06	3.05827e-06	6.72283e-06	2.84134e-06	2.89604e-06	2.60018e-06	3.47227e-06	2.06054e-06	2.34848e-06	2.84508e-06	3.24405e-06	2.67699e-06
D3ZBF1	2.11137e-10	3.45121e-12	1.20082e-10	8.3777e-11	2.43118e-10	7.13996e-11	7.73631e-11	9.26968e-11	1.12491e-10	3.60245e-10	1.59919e-10	1.31248e-10
P62268	5.05114e-06	5.55581e-06	5.78227e-06	5.57422e-06	7.90753e-06	7.79159e-06	5.84359e-06	5.18419e-06	3.06238e-06	4.93098e-06	2.79238e-06	3.00774e-06
B2GUV5	4.95055e-06	4.85391e-06	5.66521e-06	4.99757e-06	4.59169e-06	6.0597e-06	4.80004e-06	2.21309e-06	5.94243e-06	5.5012e-06	2.38763e-06	6.38963e-06
G3V644	4.32611e-06	6.03141e-06	7.08059e-06	4.27813e-06	6.53046e-06	3.42824e-06	5.35812e-06	5.31237e-06	7.37432e-06	7.81091e-06	3.10063e-06	5.78412e-06
D3ZPC4	3.58585e-06	8.64386e-06	7.75069e-06	5.45006e-06	9.70899e-06	1.79999e-06	9.59032e-06	3.69827e-06	5.4099e-06	7.0822e-06	6.12614e-06	1.95711e-06
Q64548-2	1.25947e-05	2.69931e-05	2.35459e-05	1.66125e-05	1.96292e-05	1.4404e-05	1.80112e-05	1.27905e-05	1.81924e-05	1.33685e-05	2.20403e-05	1.41137e-05
Q5RJK5	5.15022e-06	3.05195e-06	4.29978e-06	5.31298e-06	6.20848e-06	5.32916e-06	2.90419e-06	5.8383e-06	4.97993e-11	5.46845e-06	5.75736e-06	5.92415e-06
F1MAA3	3.39917e-06	4.08573e-06	4.15433e-06	3.67441e-06	4.16944e-06	2.44638e-06	3.69542e-06	3.92711e-06	3.38488e-06	3.80661e-06	3.16399e-06	2.82776e-06
Q62915	3.8337e-06	2.94398e-06	3.5932e-06	2.61405e-06	4.46428e-06	2.55788e-06	2.88468e-06	3.26685e-06	2.85481e-06	3.45406e-06	3.37161e-06	2.35566e-06
A0A096MKE2	6.78411e-07	2.97624e-06	4.85208e-06	2.38504e-06	2.32843e-06	8.08683e-07	2.44084e-06	1.01787e-06	3.58626e-06	3.28062e-06	2.99407e-06	1.31218e-06
B2RZB7	3.11602e-06	3.00692e-06	3.02297e-11	1.74573e-06	3.29689e-06	1.70951e-06	3.1146e-06	1.53472e-10	3.99193e-06	2.57016e-06	2.98225e-10	5.73138e-07
Q6AXV4	5.94283e-06	4.49429e-06	5.7271e-06	5.32641e-06	6.1309e-06	3.99068e-06	3.55131e-06	2.19413e-06	1.39934e-06	7.08321e-06	8.79155e-06	3.95236e-06
B1H267	2.74275e-07	4.93778e-07	3.14892e-07	3.49934e-07	4.91925e-07	1.98181e-06	3.26789e-07	1.77967e-06	6.00143e-07	4.95898e-07	7.99455e-07	2.70373e-07
P35171	2.11421e-05	1.98752e-05	2.2758e-05	2.03301e-05	2.06796e-05	2.21934e-05	2.0957e-05	1.75609e-05	2.67267e-05	2.21179e-05	2.80525e-05	2.4282e-05
Q68FW9	2.5894e-06	2.51592e-06	1.61139e-06	3.7709e-06	2.87838e-06	1.87793e-06	3.50587e-06	2.51933e-06	2.51528e-06	2.95933e-06	3.23645e-06	1.31553e-06
Q66X93	1.72073e-06	3.27947e-06	1.90827e-06	2.64693e-06	2.12231e-06	2.60991e-06	2.36749e-06	2.47134e-06	2.03251e-06	2.1945e-06	4.2203e-06	1.40239e-06
D3ZYU0	5.99064e-05	0.000182441	0.000162552	0.000130865	0.000128681	8.65264e-05	0.000204656	6.30997e-05	0.000175274	0.000152979	0.000163148	7.31218e-05
G3V6I9	5.73509e-06	6.69459e-06	6.80011e-06	4.9766e-06	7.30086e-06	5.43979e-06	5.47676e-06	5.91919e-06	4.38252e-06	4.61806e-06	6.72191e-06	3.335e-06
D4A6K9	1.0209e-05	1.07719e-05	1.11437e-05	1.14934e-05	4.75719e-06	5.414e-06	5.11257e-06	3.88014e-06	9.41298e-06	5.34163e-06	9.36863e-06	2.4524e-06
G3V9S0	2.69692e-06	3.63019e-06	4.64051e-06	3.36289e-06	1.80984e-06	1.62164e-06	3.28763e-06	3.10886e-06	2.12246e-06	3.03049e-06	2.15509e-06	4.39699e-07
Q64536	2.3287e-06	1.24946e-06	3.64794e-06	1.44334e-06	2.41499e-06	8.66842e-07	2.16349e-06	2.46789e-06	3.41269e-06	7.9783e-07	6.08515e-07	2.21444e-06
Q63081	7.51687e-06	9.40744e-06	8.86498e-06	7.10034e-06	9.50233e-06	6.29796e-06	9.25719e-06	7.62242e-06	1.04567e-05	1.03256e-05	8.45272e-06	7.72266e-06
Q64303	4.50539e-06	8.36267e-06	4.42797e-06	4.27484e-06	6.13002e-06	3.94658e-06	9.78725e-06	7.36049e-06	5.01487e-06	4.12796e-06	9.66044e-06	6.11723e-06
P62744	1.2621e-05	1.40748e-05	8.56671e-06	1.06558e-05	1.46759e-05	1.19463e-05	1.42615e-05	1.27541e-05	2.57648e-05	1.39164e-05	1.2961e-05	5.91302e-06
P25093	9.83468e-07	2.41858e-10	3.22493e-06	1.12054e-06	1.49261e-06	2.10245e-11	2.73357e-10	1.37643e-06	1.52579e-06	1.21841e-06	2.73261e-11	1.01669e-06
F1LRK0	2.65675e-05	2.52879e-05	2.96677e-05	2.26771e-05	2.77849e-05	2.34226e-05	2.51759e-05	2.35355e-05	2.36216e-05	2.33896e-05	2.98343e-05	1.76273e-05
D3ZDK7	1.85166e-06	1.94572e-06	2.12071e-06	4.75651e-06	1.98083e-06	1.02712e-06	1.7782e-06	1.16266e-06	2.15009e-06	2.74248e-06	1.18457e-06	1.35712e-06
Q9ER24	1.61951e-06	1.0295e-06	5.69799e-07	1.25639e-06	8.13622e-07	1.10228e-06	1.13188e-06	4.82414e-07	1.04371e-06	2.22506e-06	5.49571e-07	3.84066e-07
B1WC26	1.9647e-06	4.32113e-06	2.92394e-06	3.24227e-06	2.23364e-06	1.754e-06	3.29405e-06	1.15605e-06	1.88125e-06	3.6385e-10	1.69719e-06	1.40252e-06
P62718	3.98593e-06	4.48178e-06	5.56837e-06	3.79865e-06	4.56863e-06	1.66936e-06	2.63066e-06	3.23719e-06	2.65519e-06	2.28969e-06	4.68767e-06	4.37904e-06
D3ZZN4	3.4968e-06	5.26055e-06	3.31817e-06	4.14275e-06	2.47117e-06	7.05094e-11	8.36342e-11	3.79182e-06	2.53454e-06	2.28556e-10	3.10975e-06	1.4799e-06
P97846	3.63057e-06	4.48575e-06	5.34192e-06	4.33147e-06	3.80506e-06	2.35888e-06	3.77196e-06	4.41531e-06	6.99249e-06	1.2859e-05	5.6252e-06	1.99773e-06
P04466	1.55348e-10	1.45051e-10	1.58242e-10	2.91327e-10	8.62904e-11	1.50588e-10	1.4295e-10	5.99455e-06	1.7586e-10	1.08668e-10	1.62264e-10	2.74517e-11
D4A7N1	5.4796e-06	5.02064e-06	5.86465e-06	4.38439e-06	5.73964e-06	5.60012e-06	4.59082e-06	6.96344e-06	5.7741e-06	5.51552e-06	7.80168e-06	5.02848e-06
P97576	3.12489e-06	2.87962e-06	5.19407e-06	2.62697e-06	2.68282e-06	2.39936e-06	2.99414e-06	3.02073e-06	4.42803e-06	3.46891e-06	3.13665e-06	1.23045e-06
B5DEN9	2.15533e-10	5.23879e-07	8.09954e-11	1.16156e-06	4.80751e-07	1.00748e-06	1.6487e-10	4.74402e-11	6.24988e-07	1.29929e-06	1.91882e-10	1.2098e-10
P28037	1.53711e-06	2.8514e-06	3.16845e-06	2.49119e-06	2.84963e-06	1.45621e-06	2.15264e-06	7.3206e-07	1.2404e-06	2.72113e-06	2.9409e-06	8.4085e-07
G3V864	3.73978e-06	4.70985e-06	2.04366e-06	6.13629e-06	4.93822e-06	2.2814e-06	5.5072e-06	3.54662e-06	4.01364e-06	5.16216e-06	7.08143e-06	2.72275e-06
Q5RJR2	2.75808e-10	2.42246e-10	4.66292e-06	2.59835e-10	4.38083e-06	2.03757e-06	4.19788e-06	3.45764e-06	3.12073e-06	1.53609e-06	4.32827e-06	3.67787e-06
P62634	3.75125e-06	1.93944e-06	1.9116e-06	2.56459e-06	2.64119e-06	3.00733e-06	3.11537e-06	9.18247e-07	1.35616e-06	2.66461e-06	2.29925e-06	2.31416e-06
P08753	6.42716e-05	8.52038e-05	7.68962e-05	7.89707e-05	7.96605e-05	1.26826e-05	7.88815e-05	2.18381e-05	8.37e-05	8.43501e-05	9.20581e-05	8.98423e-06
Q5HZE4	1.76601e-06	2.26419e-06	2.61973e-06	1.55173e-06	1.98751e-06	9.31875e-07	2.28579e-06	1.95945e-06	4.83171e-11	1.35781e-06	2.31133e-06	1.86129e-10
D3ZAK6	4.83739e-06	5.28661e-06	6.3623e-06	4.98717e-06	4.73678e-06	2.94397e-06	4.51496e-06	4.94524e-06	5.00977e-06	4.6213e-06	5.51636e-06	2.56908e-06
Q80Z30	1.53924e-05	2.50879e-05	1.86652e-05	2.1237e-05	1.79396e-05	1.10986e-05	1.79597e-05	1.76563e-05	1.52093e-05	2.19042e-05	2.31624e-05	6.95592e-06
Q5XI77	6.14885e-06	7.52918e-06	5.97845e-06	5.44653e-06	6.14491e-06	3.47331e-06	6.43335e-06	5.40719e-06	5.79417e-06	6.74034e-06	3.31791e-06	4.27703e-06
Q5XFW8	2.50347e-06	1.39071e-06	3.13885e-11	2.73393e-06	3.79625e-11	6.84641e-07	5.1878e-07	7.09436e-11	3.16936e-06	9.17344e-07	3.37297e-06	2.08877e-10
F1M386	1.60834e-06	2.0324e-06	2.26709e-06	2.84096e-06	2.07646e-06	1.6962e-06	2.26748e-06	1.61791e-06	1.74223e-06	2.33354e-06	2.40879e-06	2.2505e-06
D3ZN21	1.94739e-06	4.76918e-06	4.03137e-06	3.74491e-06	3.15789e-06	3.98534e-06	2.915e-06	1.77741e-06	2.81792e-06	2.78776e-06	1.4737e-06	2.5588e-06
P36506	1.2991e-05	1.68308e-05	1.48836e-05	1.42005e-05	1.54687e-05	8.99699e-06	1.58551e-05	1.2939e-05	1.79367e-05	1.57873e-05	9.63724e-06	3.45644e-06
Q9R1B1	3.14531e-07	1.9298e-11	4.1596e-11	2.0037e-10	3.43903e-11	1.74991e-10	9.80116e-11	3.04044e-10	1.98014e-10	5.48541e-07	3.17036e-10	7.09578e-07
P40329	1.99656e-06	1.58722e-06	2.19486e-06	1.31817e-06	2.08725e-06	8.42926e-07	1.72944e-06	1.29351e-06	2.13166e-06	1.22768e-06	1.24509e-06	1.07667e-06
B0BN81	7.33465e-06	7.76036e-06	1.24872e-05	6.77134e-06	6.47027e-06	3.31358e-06	6.50351e-06	7.17378e-06	6.99627e-06	6.53555e-06	6.28649e-06	7.44668e-06
Q4V898	9.38087e-06	7.12706e-06	2.79454e-06	7.96417e-06	7.77847e-06	1.65135e-06	9.36288e-06	9.10977e-07	9.73449e-06	5.78758e-06	6.27924e-06	1.83734e-06
M0R735	1.09556e-06	2.71023e-06	2.28287e-06	1.60545e-10	2.09138e-10	1.28812e-06	5.71175e-07	2.04055e-06	1.16834e-10	9.98902e-07	1.63232e-06	4.44499e-07
Q9Z2S9-3	2.30774e-07	1.29053e-06	1.5663e-06	2.9599e-06	1.42203e-06	9.97334e-07	1.68261e-06	3.47947e-06	1.74611e-06	6.39835e-07	2.8333e-06	1.61851e-06
Q566E4	1.88357e-06	4.47875e-06	5.37605e-06	2.79371e-06	3.54766e-06	5.19305e-06	3.09111e-06	3.02959e-06	5.5474e-06	2.91446e-06	3.61701e-06	3.86438e-06
Q91XV6-2	2.172e-10	9.66769e-11	1.6843e-10	3.01388e-10	4.10443e-06	1.61153e-06	2.65396e-10	2.58371e-10	8.19724e-11	1.17253e-10	8.7091e-12	1.47918e-10
B0BN46	2.73974e-06	3.16066e-06	1.94823e-06	3.27566e-06	1.84969e-06	1.70278e-06	3.42067e-06	1.7037e-06	4.54277e-07	2.32278e-06	4.28528e-06	1.19776e-06
Q9WV63	4.87378e-06	5.17183e-06	4.32606e-06	5.62457e-06	5.01084e-06	4.52432e-06	5.56964e-06	3.83679e-06	5.09564e-06	6.52559e-06	5.75441e-06	3.78884e-06
P45479	2.98687e-06	3.95714e-06	5.10559e-06	2.92917e-06	4.95207e-06	2.63173e-06	2.45128e-06	4.3528e-06	1.16675e-06	2.6463e-06	4.20208e-06	2.61976e-06
G3V9B3	1.27501e-05	1.43955e-05	1.72314e-05	1.93782e-05	1.29123e-05	1.44149e-05	1.50403e-05	1.30907e-05	2.06277e-05	1.66211e-05	1.22907e-05	1.43082e-05
P61972	7.88532e-06	7.38386e-06	3.48998e-06	4.16302e-06	1.97863e-06	1.43807e-10	6.56064e-06	2.83482e-06	2.97648e-06	5.33323e-06	2.74938e-06	1.47337e-10
M0R961	2.52511e-06	3.01039e-06	3.74126e-06	2.4708e-06	3.04574e-06	2.37494e-06	3.09457e-06	3.21617e-06	2.773e-06	2.72652e-06	3.1652e-06	2.84022e-06
Q6AY18	6.56101e-11	4.76439e-07	3.36902e-06	3.96098e-06	5.19148e-11	1.36348e-07	3.26824e-06	1.56814e-07	1.07621e-06	7.02821e-06	1.14047e-10	1.36982e-06
G3V907	7.79031e-07	5.32993e-07	1.88532e-10	1.94197e-06	7.32744e-07	3.33768e-07	4.56073e-07	2.17098e-10	1.13582e-10	2.70218e-10	1.42692e-06	1.75079e-10
P83732	6.32679e-06	5.18905e-06	4.85907e-06	7.76593e-06	7.74418e-06	5.83019e-06	4.54259e-06	7.02144e-06	4.0869e-06	5.85602e-06	5.56929e-06	5.02494e-06
P60123	1.38473e-06	1.65556e-06	1.67513e-06	1.81394e-06	1.56673e-06	9.27158e-07	1.66484e-06	1.65809e-06	1.77907e-06	1.95599e-06	1.30124e-06	1.22955e-06
B2GV54	3.23501e-06	3.86456e-06	3.38039e-06	2.44574e-06	3.12098e-06	2.38801e-06	2.46254e-06	2.00266e-06	3.43092e-06	2.72249e-06	2.61475e-06	2.07462e-06
Q9JHW0	5.69712e-11	2.98557e-06	1.47783e-10	2.81125e-10	2.32519e-10	2.88519e-06	2.35328e-06	2.95893e-10	3.44254e-06	3.04821e-06	2.10205e-06	1.28035e-06
D3ZT16	1.31182e-06	1.30815e-10	2.68743e-06	3.87754e-06	2.49238e-10	2.89563e-06	2.17409e-10	2.86925e-10	1.34334e-10	2.96738e-06	1.55402e-06	1.83908e-06
F1LRV9	1.55712e-10	2.38982e-10	4.60197e-11	2.15057e-10	1.87851e-10	9.03819e-11	1.80259e-10	1.08277e-05	5.48436e-11	2.99691e-10	2.29451e-10	7.93274e-12
Q3KRE2	1.6584e-06	1.60961e-06	1.25e-06	1.87931e-06	2.72238e-06	7.96954e-07	1.48318e-06	2.38314e-06	1.65393e-06	1.64456e-10	1.66781e-06	1.34717e-06
Q641Y8	3.09151e-06	2.2714e-06	2.27266e-06	2.82754e-06	2.24273e-06	1.44983e-06	2.48639e-06	2.02377e-06	1.95321e-06	2.53766e-06	2.23296e-06	1.87704e-06
G3V836	4.64262e-06	3.56157e-06	4.68055e-06	4.57122e-06	3.70828e-06	2.51852e-06	4.40328e-06	2.9356e-06	7.6331e-06	5.00596e-06	7.66807e-06	3.04994e-06
F1M8L1	4.4324e-06	4.64081e-06	3.37636e-06	5.2843e-06	4.63716e-06	4.52432e-06	5.05546e-06	3.83679e-06	4.8453e-06	6.06198e-06	5.75441e-06	3.35321e-06
O35796	1.61465e-05	1.97231e-05	1.23479e-05	1.82351e-05	2.05048e-05	9.51207e-06	2.29306e-05	1.48095e-05	1.24072e-05	1.78514e-05	1.54764e-05	6.04209e-06
Q63633-2	1.83622e-05	1.79899e-05	1.6887e-05	1.65119e-05	1.68418e-05	1.22252e-05	1.75976e-05	1.6265e-05	1.65479e-05	2.11747e-05	1.52559e-05	1.19461e-05
P62078	2.1961e-11	2.03347e-06	2.41535e-11	1.52019e-06	1.80141e-06	5.0835e-07	1.88305e-06	3.12412e-10	1.69713e-11	2.42541e-06	2.49972e-10	1.29728e-10
Q5XIT9	7.74009e-07	6.83947e-07	5.10575e-07	9.65225e-07	1.31457e-06	1.85385e-07	1.03703e-06	1.02053e-06	6.56101e-12	3.05895e-06	1.02617e-06	7.57566e-07
Q68FR9-2	6.02615e-06	4.79023e-06	4.58212e-06	6.64245e-06	6.49163e-06	1.99846e-06	7.26835e-06	6.13211e-06	4.35232e-06	7.59015e-06	5.78385e-06	2.07379e-06
P61203	2.46273e-06	2.93306e-06	1.09273e-06	2.27909e-06	3.42024e-06	1.25047e-06	3.35645e-06	1.67558e-06	1.16294e-06	1.94732e-06	2.12211e-06	1.18734e-06
P55067	9.13171e-06	1.11595e-05	1.36931e-05	9.38874e-06	8.57799e-06	8.87629e-06	7.9422e-06	8.2323e-06	9.65041e-06	9.40589e-06	1.28252e-05	7.43996e-06
P62914	5.22911e-06	6.04958e-06	7.54404e-06	5.46079e-06	5.96681e-06	5.03624e-06	1.43614e-05	7.94023e-06	4.95411e-06	5.72512e-06	3.49615e-06	5.60654e-06
Q9JJ19	6.59316e-06	9.30428e-06	6.64658e-06	6.18475e-06	6.99482e-06	5.7947e-06	8.49655e-06	6.1583e-06	5.1116e-06	9.4374e-06	9.45916e-06	5.81858e-06
P14659	0.00017012	0.000212577	0.000152148	0.000187321	0.000184643	0.000130754	0.000214519	0.000201066	0.000196889	0.000238372	0.000247634	0.000115219
D3Z9L0	4.44814e-06	4.02778e-06	5.43496e-06	2.04965e-06	3.3377e-06	4.13453e-06	1.8294e-06	6.25849e-06	1.14638e-06	2.14714e-06	2.70175e-06	2.81894e-06
D3ZTW9	1.03645e-06	1.42928e-06	7.3997e-07	8.93153e-07	1.57516e-10	2.28678e-10	8.83015e-11	5.5085e-07	6.92799e-07	7.35234e-07	1.32673e-06	3.69224e-07
Q9JM53	2.92538e-06	4.27369e-06	8.18384e-07	4.53349e-06	3.45645e-06	2.05717e-06	3.98457e-06	2.89876e-06	2.74594e-06	2.26922e-06	3.33819e-06	1.9099e-06
D4ABT8	2.85107e-06	3.0182e-06	3.04925e-06	2.86963e-06	3.40567e-06	3.00762e-06	3.38481e-06	2.35598e-06	2.27076e-06	3.45451e-06	2.21612e-06	1.04004e-06
D3ZFX4	2.46236e-06	3.18829e-06	2.75439e-06	4.7989e-06	2.13164e-06	1.3599e-06	4.50583e-06	2.71222e-06	2.60245e-06	3.64737e-06	2.0463e-06	2.33239e-06
D4A4P3	6.56683e-06	9.91174e-06	1.35439e-05	6.50324e-06	7.7478e-06	7.90219e-06	8.35263e-06	8.27883e-06	4.42699e-06	6.85285e-06	1.06739e-05	1.91771e-10
P47728	1.17592e-05	2.55429e-05	1.01179e-05	1.27809e-05	1.26764e-05	6.39024e-06	1.31614e-05	1.83872e-05	1.12414e-05	9.04394e-06	1.06658e-05	5.92773e-06
M0R4R4	1.38315e-06	9.77985e-07	2.03084e-06	1.05843e-06	1.36855e-06	1.43995e-06	7.47188e-11	1.48354e-06	1.76506e-06	1.85459e-06	1.5643e-06	2.01063e-06
D3ZAF6	2.23466e-05	3.13907e-05	3.85036e-05	2.97096e-05	2.80424e-05	1.32077e-06	3.08988e-05	2.24123e-05	2.75353e-05	2.83407e-05	2.47954e-05	1.50188e-06
D3ZG88	5.53192e-11	2.70762e-10	1.84774e-10	9.31867e-07	2.04292e-10	5.24566e-11	3.54029e-07	5.27326e-07	1.83007e-10	3.69973e-10	4.91753e-07	9.88625e-07
D4ABK1	8.87185e-06	8.0111e-06	2.51309e-05	7.63472e-06	3.72898e-05	1.99594e-05	8.9353e-06	1.61163e-05	2.40181e-05	9.32479e-06	3.03708e-05	2.21557e-05
Q6P9U0	7.29456e-11	2.22179e-06	5.50195e-07	3.58221e-13	2.72121e-10	2.13543e-07	1.59798e-10	2.49361e-06	1.08035e-06	1.29712e-10	6.73456e-11	5.71472e-07
P35427	1.25602e-06	2.47472e-06	1.24069e-06	1.23073e-06	2.2182e-06	7.02594e-07	2.19295e-06	2.1075e-06	8.53492e-07	2.14184e-06	2.708e-06	3.33794e-06
P39052-4	5.17487e-05	8.24795e-05	7.95077e-05	6.64371e-05	7.37829e-05	4.99897e-05	7.96251e-05	6.2267e-05	7.63131e-05	7.46264e-05	6.97599e-05	4.63638e-05
D3Z9X1	4.60898e-05	6.90607e-05	2.71201e-05	5.53617e-05	6.87019e-05	3.56993e-05	5.57585e-05	4.67302e-05	5.99309e-05	6.88896e-05	6.68664e-05	3.7553e-05
F1LMQ3	1.1242e-06	1.47906e-06	1.70724e-06	1.11913e-06	1.61008e-06	3.27972e-06	1.40322e-06	1.08989e-06	1.34351e-06	1.28019e-06	1.30005e-06	7.30787e-07
Q9JI66-3	8.47589e-06	1.08704e-05	9.18625e-06	6.94149e-06	7.87625e-06	4.4748e-06	1.10879e-05	9.00161e-06	7.67406e-06	8.36736e-06	9.78609e-06	6.62048e-06
F1LPP6	2.79558e-06	5.54475e-06	2.5116e-06	4.09124e-06	4.16136e-06	2.66823e-06	5.26666e-06	3.87595e-06	1.35437e-06	5.54777e-06	3.85205e-06	2.22232e-06
P17078	5.80499e-06	6.78371e-06	5.9786e-06	6.26254e-06	6.50749e-06	4.14852e-06	7.36809e-06	8.62819e-06	5.99529e-06	6.10928e-06	8.19055e-06	5.58919e-06
Q5HZA6-2	2.60303e-06	2.40393e-06	2.89793e-06	2.19901e-06	2.63707e-06	2.28383e-06	2.29456e-06	2.98382e-06	2.53875e-06	2.05192e-06	2.93879e-06	1.90687e-06
P15178	2.993e-06	3.15589e-06	3.41874e-06	2.78175e-06	4.33726e-06	1.1419e-06	2.31672e-06	2.81947e-06	9.91035e-07	2.31812e-06	3.43238e-06	1.79627e-06
P13437	2.93027e-06	2.37607e-06	2.47643e-06	1.97157e-06	2.83756e-06	2.56889e-06	1.5245e-06	2.45611e-06	1.9756e-06	3.31363e-06	2.49085e-06	2.31485e-06
F7F134	3.85682e-06	4.73325e-06	5.12639e-06	1.39567e-05	4.94377e-06	3.10442e-06	4.69293e-06	4.68956e-06	5.52723e-06	3.90689e-06	5.37323e-06	3.74832e-06
Q66HF3	1.78143e-06	1.9174e-06	1.38517e-06	1.78702e-06	1.75116e-06	1.87368e-06	2.58381e-06	3.0827e-06	1.85783e-06	2.28791e-06	2.66907e-06	1.8804e-06
F7EVC6	8.50936e-06	8.06524e-06	6.96212e-06	8.42849e-06	9.32666e-06	6.58482e-06	8.94574e-06	8.28117e-06	6.11509e-06	8.72914e-06	9.92284e-06	5.97118e-06
D4AEI5	3.47168e-06	3.03611e-06	3.05402e-06	2.74869e-06	2.93141e-06	3.05004e-06	3.38827e-06	2.04178e-06	2.611e-06	3.46162e-06	2.78e-06	2.5662e-06
Q811X6	2.08195e-06	1.69968e-06	2.29357e-06	1.7234e-06	1.10946e-06	1.28652e-06	1.9595e-06	1.86741e-06	1.88769e-06	1.95092e-06	1.18829e-06	1.33722e-06
D4A6C9	2.30919e-06	2.08759e-06	3.53641e-06	2.20714e-06	1.46411e-06	2.10528e-06	2.0934e-06	1.44794e-06	3.56522e-06	3.04261e-06	2.23015e-06	3.02783e-06
M0RBD0	4.99882e-06	5.34338e-06	5.29654e-06	5.15794e-06	4.29549e-06	2.6232e-06	5.67252e-06	2.96563e-06	5.01342e-06	5.06807e-06	4.0388e-06	4.04698e-06
O88794	1.1563e-06	1.32828e-10	2.39242e-06	2.08005e-06	7.26102e-07	8.70461e-07	7.76351e-07	3.84624e-07	2.08286e-06	1.64242e-06	2.23213e-06	6.30698e-07
P29457	1.09546e-06	1.29077e-06	1.07721e-06	1.05987e-06	9.82105e-07	1.24e-07	1.7085e-06	1.45858e-06	3.34375e-06	2.05305e-06	1.78838e-06	1.21299e-06
R9PXZ2	3.98629e-06	4.26636e-06	5.72789e-06	2.46898e-06	4.55818e-06	4.34125e-06	5.65837e-06	5.34563e-06	5.11064e-06	3.10935e-06	4.00257e-06	3.40612e-06
Q5BJZ3	3.65588e-06	3.16444e-06	3.46486e-06	3.11046e-06	9.94838e-06	2.64015e-06	3.19805e-06	8.79688e-06	2.64007e-06	9.25964e-06	3.61061e-06	2.77579e-06
B2RYX0	4.32082e-06	5.94854e-06	5.23506e-06	4.60961e-06	4.73016e-06	4.02374e-06	5.87071e-06	5.11902e-06	5.40029e-06	6.36369e-06	3.90044e-06	3.81188e-06
G3V6H9	5.05409e-06	6.94519e-06	8.68008e-06	5.39609e-06	5.02222e-06	2.40309e-06	4.38937e-06	6.78092e-06	5.06251e-06	7.73469e-06	6.84315e-06	5.3926e-06
Q8VIL3	1.27291e-06	2.37062e-06	8.41098e-07	7.99004e-07	1.5607e-06	1.89784e-10	3.44483e-06	3.63719e-11	2.3679e-06	3.36549e-06	2.18547e-06	1.20211e-07
D4A8H8	1.55203e-05	1.62694e-05	1.68232e-05	1.55103e-05	1.60076e-05	1.0144e-05	1.65515e-05	1.49011e-05	1.48766e-05	1.60894e-05	1.78837e-05	8.50942e-06
D3ZPU3	1.28141e-06	1.41226e-10	1.2942e-06	1.16546e-10	2.21085e-10	8.73077e-07	4.28226e-06	1.85075e-06	1.05346e-06	7.77809e-11	1.23743e-10	1.05115e-06
M0RD20	1.18595e-10	1.21601e-06	1.72235e-06	1.04819e-10	1.08655e-06	1.09199e-06	7.4827e-07	1.03332e-10	5.81184e-11	2.89925e-10	1.35796e-06	7.24578e-07
D3ZJR1	2.43892e-06	2.48484e-06	2.42692e-06	2.36976e-06	2.54463e-06	1.11014e-06	2.49226e-06	2.07111e-06	1.95263e-06	2.56203e-06	2.23048e-06	2.46955e-06
P14480	1.01681e-10	8.93575e-11	6.11647e-12	1.92193e-11	6.41395e-11	1.06641e-10	2.66711e-10	4.37981e-06	2.37657e-06	3.73652e-06	3.00665e-07	1.06343e-10
P35289	1.98181e-05	9.9115e-05	8.80848e-05	7.8656e-05	1.95754e-05	8.04755e-07	8.32729e-05	4.22887e-05	4.94626e-05	5.28877e-05	8.0878e-05	4.16888e-05
Q5M7W5	1.84331e-05	2.20173e-05	1.45152e-05	1.86357e-05	1.84374e-05	1.66776e-05	2.00813e-05	1.8537e-05	1.20011e-05	1.9785e-05	2.25455e-05	1.4154e-05
Q5U2R0	2.72591e-06	2.31458e-06	3.48651e-06	2.77917e-06	2.81174e-06	2.63794e-06	3.08132e-06	2.26301e-06	3.25938e-06	2.39573e-06	2.47256e-06	1.02536e-06
P10960	1.26801e-05	2.57632e-05	2.46833e-05	2.72311e-05	2.67374e-05	9.05503e-06	2.52022e-05	1.9893e-05	1.91918e-05	2.51679e-05	2.62637e-05	1.49881e-05
B5DES0	4.79192e-06	2.64118e-10	5.09835e-06	1.56589e-10	2.08172e-10	1.9087e-10	3.81477e-06	4.02557e-06	2.20918e-06	3.71523e-10	6.15365e-06	3.34751e-06
P62997	1.47127e-06	8.59239e-07	5.33166e-07	1.48565e-06	1.57389e-06	6.0272e-11	1.86244e-06	1.4997e-06	5.04672e-07	1.93449e-06	2.24262e-06	2.89765e-07
contaminant_Q3SX28	2.40449e-05	2.5121e-05	4.69524e-06	2.3061e-05	2.58482e-05	1.62751e-05	2.29835e-05	2.5006e-05	1.82596e-05	2.49789e-05	3.02462e-05	6.17812e-06
P15650	2.39714e-06	3.94746e-06	3.456e-06	3.52711e-06	2.84046e-06	1.81612e-06	2.31588e-06	1.1737e-06	3.41713e-06	3.75461e-06	2.60474e-06	2.83982e-06
O35458	4.30547e-06	6.19285e-06	5.98447e-06	5.83213e-06	6.84128e-06	3.83406e-06	5.79263e-06	6.53954e-06	5.78021e-06	5.58924e-06	5.97639e-06	4.76715e-06
F1LRB7	9.67014e-07	1.4794e-06	1.54507e-06	1.16951e-06	3.71535e-07	1.07649e-06	1.41515e-06	1.36053e-06	1.19532e-06	1.37099e-06	1.00296e-06	1.46664e-06
Q498U4	1.33736e-10	1.02369e-06	1.29111e-10	8.3838e-07	6.928e-07	5.44857e-11	2.24084e-10	1.87905e-06	1.59257e-11	9.8419e-07	1.00358e-06	2.2015e-10
P85972	6.18453e-07	2.42185e-06	6.44294e-07	1.08614e-06	2.11655e-06	9.65818e-07	1.93835e-06	1.42545e-06	9.00476e-07	2.31339e-06	1.54282e-05	6.33402e-07
G3V9P0	1.23546e-06	2.75104e-10	2.84196e-06	2.18864e-06	1.54232e-06	1.53547e-10	2.57849e-06	8.60737e-07	2.46813e-06	1.17853e-10	1.42301e-06	1.5769e-06
P24473	2.15063e-06	2.87227e-06	1.96801e-06	2.11118e-06	2.29771e-06	2.26273e-06	2.46737e-06	1.59169e-06	2.33452e-06	2.96482e-06	2.89938e-06	1.7971e-06
Q91XU1	1.34386e-06	1.72457e-06	1.07664e-06	1.59575e-06	1.36559e-06	1.2156e-06	1.10503e-06	1.53445e-06	1.71125e-06	1.41356e-06	1.09073e-06	7.72155e-07
D4AAE9	1.04508e-06	2.18488e-06	2.07879e-11	1.82534e-06	1.03654e-11	6.02386e-07	1.73022e-06	2.98027e-10	2.43151e-06	2.63288e-06	1.10119e-06	1.47567e-07
F1M6P0	0.000132264	0.000172062	0.000140724	0.000133257	0.000158114	4.73864e-05	0.000178397	0.000128892	0.000143369	0.000151279	0.000138593	2.2531e-05
Q3ZB98-5	1.34797e-05	1.03598e-05	1.41004e-05	1.64938e-05	1.05077e-05	1.02428e-05	1.24668e-05	8.35495e-06	1.53902e-05	1.31098e-05	9.34427e-06	1.11407e-05
Q4QQV8	3.11152e-11	4.01612e-06	5.475e-07	1.23944e-10	3.70431e-06	2.44243e-10	4.46981e-06	2.39588e-06	1.12594e-10	5.26419e-06	2.25634e-06	2.75049e-07
Q6AY86	1.89039e-06	2.04709e-06	7.04337e-07	1.84191e-06	1.50612e-06	6.14988e-07	3.54004e-06	1.62235e-06	9.44756e-07	1.86182e-06	1.59299e-06	5.90103e-07
Q9ES40	2.52892e-06	3.96421e-06	3.21887e-06	2.71251e-06	3.91511e-06	1.147e-06	4.18514e-06	7.68601e-07	2.96991e-06	6.53901e-06	2.84964e-06	8.96493e-07
Q6P9V1	4.6693e-05	3.60321e-05	5.07413e-05	5.92517e-05	4.51124e-05	1.34223e-05	4.05866e-05	3.18045e-05	5.67981e-05	5.52675e-05	4.25641e-05	3.07921e-05
D3ZF13	3.89824e-06	4.87224e-06	5.07421e-06	3.36274e-06	3.55913e-06	1.58045e-06	2.4139e-06	1.543e-06	3.00152e-06	4.41993e-06	3.30899e-06	1.71052e-06
P51583	1.83544e-06	2.43659e-06	2.15038e-06	8.69698e-11	1.69375e-10	9.19886e-07	2.61827e-11	1.74042e-06	2.20954e-06	6.61157e-11	2.20518e-06	5.4472e-07
P54290	3.85682e-06	4.73325e-06	5.12639e-06	1.39567e-05	4.94377e-06	3.10442e-06	4.69293e-06	4.68956e-06	5.52723e-06	3.90689e-06	5.37323e-06	3.74832e-06
G3V6M3	2.50968e-05	3.85472e-05	6.33123e-05	3.78698e-05	3.39188e-05	2.76807e-05	4.33533e-05	3.74557e-05	4.52334e-05	4.50661e-05	5.25116e-05	1.66131e-05
D4A193	1.48383e-06	1.01562e-06	1.7074e-06	1.51254e-06	1.40123e-10	9.77398e-07	4.07768e-11	9.28529e-07	1.75067e-10	1.37638e-06	1.31253e-06	1.34575e-06
Q5U2Z3	2.98117e-06	3.66713e-06	6.5765e-06	3.41741e-06	3.9567e-06	3.49124e-06	4.03361e-06	3.62405e-06	3.96441e-06	4.06117e-06	4.4345e-06	3.9473e-06
D3ZXH7	1.68775e-06	6.19614e-07	4.57439e-06	1.45367e-06	3.69035e-06	1.19366e-10	2.10447e-06	4.03344e-07	9.25091e-11	1.90232e-06	2.18274e-10	2.19502e-10
M0R3V4	1.52415e-06	9.52178e-07	1.36396e-10	2.77291e-06	1.78589e-06	2.30345e-06	1.85944e-06	1.74942e-06	1.75707e-06	2.03118e-06	9.18472e-07	2.63792e-11
P97834	1.7557e-06	3.09941e-06	2.39097e-06	3.36879e-06	1.62399e-06	1.3124e-06	2.39008e-06	2.12797e-06	1.51321e-06	2.40687e-06	2.87328e-06	1.51725e-06
Q6IRJ7	4.00117e-12	2.76046e-06	3.43635e-06	2.43824e-10	4.91902e-06	2.43327e-06	1.85461e-10	2.74758e-06	3.08892e-06	1.74397e-10	4.90568e-07	1.72247e-06
Q924N5	3.88247e-06	4.10071e-06	4.34396e-06	4.38245e-06	4.89166e-06	3.174e-06	2.85582e-06	2.72518e-06	3.44571e-06	3.30595e-06	5.97895e-06	3.15531e-06
Q6TXE9	2.33339e-06	2.10274e-06	2.79171e-06	1.47612e-06	2.78145e-06	1.82793e-06	2.74052e-06	2.8763e-06	2.05801e-06	2.57275e-06	2.77269e-06	2.60125e-06
D4ADS8	2.07987e-05	0.000162506	7.23822e-05	0.000122808	2.24876e-05	2.44169e-07	0.000125849	0.000110728	5.95928e-05	0.00012273	0.000136244	4.09195e-05
P05942	2.07078e-07	4.50095e-11	8.81195e-11	3.06871e-10	2.24261e-10	1.8655e-11	1.09629e-10	2.44185e-10	1.47962e-10	1.52694e-11	2.61167e-10	1.99056e-10
Q6QI86	2.29332e-06	3.37843e-06	2.87966e-06	3.58668e-06	2.77595e-06	1.25495e-06	4.39281e-06	3.11629e-06	3.13274e-06	2.21716e-06	1.67693e-06	1.16306e-06
A0JN30	4.60874e-06	5.13507e-06	2.36859e-06	5.30633e-06	5.26618e-06	2.25316e-06	5.16306e-06	2.07247e-06	2.92062e-06	5.25355e-06	3.2399e-06	8.31997e-07
P09006	5.90021e-11	6.67952e-11	1.30451e-10	2.0336e-10	2.31684e-10	2.50592e-10	3.9598e-07	3.10438e-06	3.50212e-06	1.46645e-06	1.47966e-10	1.80598e-10
B5DF91	2.4182e-06	4.02441e-06	2.4039e-06	3.36223e-06	4.33637e-06	2.14485e-06	2.69764e-06	2.69154e-06	3.02251e-06	3.80149e-06	6.47282e-07	1.58214e-06
G3V6P7	8.18635e-06	7.64103e-06	8.92878e-06	8.45307e-06	6.36205e-06	7.45988e-06	7.19468e-06	7.20073e-06	8.7763e-06	8.75053e-06	7.26758e-06	7.98875e-06
Q2PQA9	2.96304e-06	1.0576e-06	5.58119e-06	2.3519e-06	3.5485e-06	3.27642e-06	3.08842e-06	3.63732e-06	5.53179e-06	2.38032e-06	4.34196e-06	4.64056e-06
F1M3H8	5.43015e-06	4.49416e-06	4.61518e-06	4.57155e-06	5.67254e-06	7.04068e-06	5.88345e-06	4.39938e-06	3.33994e-06	4.23109e-06	4.34631e-06	4.85666e-06
Q63083	1.40694e-06	2.78586e-06	3.52478e-11	1.95561e-06	4.40347e-06	1.20132e-06	3.64147e-06	1.05886e-06	1.99462e-10	1.22061e-06	1.5932e-06	3.06472e-11
D3ZVR7	1.46604e-06	1.48622e-06	2.23915e-06	1.43216e-06	2.40989e-06	1.69674e-06	1.06584e-06	1.60073e-10	2.17097e-06	1.19248e-06	1.55142e-10	1.88089e-06
Q63377	9.28432e-06	8.09637e-06	7.56627e-06	5.75538e-06	7.94676e-06	4.16823e-06	5.14553e-06	6.00264e-06	5.09082e-06	8.82689e-06	4.75344e-06	4.90288e-06
Q62733	1.31103e-06	2.03147e-10	1.90439e-06	1.07471e-06	2.52281e-06	2.45154e-06	4.54591e-06	3.17179e-10	2.22741e-10	1.24253e-06	1.11494e-06	1.32372e-06
Q9ESH6	5.3488e-06	5.18793e-06	6.63014e-06	5.7665e-06	6.51778e-06	4.28708e-06	6.05021e-06	5.07043e-06	5.60748e-06	5.55806e-06	6.68771e-06	4.23596e-06
D4A6L0	2.97942e-06	4.66447e-06	3.55573e-06	3.26327e-06	2.76583e-06	1.81486e-06	3.19316e-06	2.46901e-06	3.06424e-06	4.10777e-06	3.34165e-06	2.12384e-06
Q8CGU4	2.59487e-06	4.08885e-06	4.01897e-06	2.6388e-06	2.55503e-06	3.19072e-06	2.77215e-06	2.14647e-06	2.11829e-06	2.51918e-06	3.51384e-06	3.18428e-06
Q641Z9	6.70045e-06	6.99408e-06	6.2908e-11	6.29801e-06	5.1658e-06	1.83701e-05	1.35165e-05	2.47534e-05	1.35977e-10	1.28418e-05	6.17907e-06	1.64532e-10
Q5XHY5	1.75673e-06	1.71534e-06	4.11906e-06	1.66751e-06	1.18349e-06	9.38574e-07	2.31022e-06	1.24417e-06	4.42604e-06	1.62821e-06	8.48312e-07	3.78609e-06
F1LNM0	1.17172e-05	1.15591e-05	1.21941e-05	1.42275e-05	1.16848e-05	8.12401e-06	1.24123e-05	6.73092e-06	3.86695e-06	1.34803e-05	1.08965e-05	4.14268e-06
F1LP80	1.39296e-06	1.94418e-10	2.47624e-06	2.04497e-11	9.12384e-07	7.87107e-07	2.09918e-06	1.85758e-06	2.82763e-06	2.40172e-06	1.16593e-06	1.41333e-06
P32089	5.37915e-06	4.45832e-06	5.27965e-06	4.56022e-06	4.21886e-06	2.66737e-06	3.69655e-06	4.29534e-06	3.34406e-06	3.56792e-06	3.97764e-06	3.507e-06
Q5XII0	3.03944e-06	2.84632e-06	1.06798e-06	2.80997e-06	2.95591e-06	1.72399e-06	3.23527e-06	1.85021e-06	2.25457e-06	2.59513e-06	3.69877e-06	1.16456e-06
Q68FX1	1.31892e-06	2.31021e-06	1.56472e-06	1.48388e-06	9.73764e-07	1.9302e-06	1.31208e-06	9.68928e-07	3.10123e-06	1.46765e-06	1.32007e-06	1.34502e-06
Q5RJR8	4.79532e-06	3.93233e-06	2.84774e-06	3.52943e-06	3.45713e-06	2.5133e-06	3.5822e-06	4.06379e-06	2.5566e-06	4.13142e-06	3.92146e-06	2.29486e-06
M0RDF0	8.90867e-11	1.36639e-10	1.57194e-11	1.82521e-10	2.86102e-10	9.83413e-11	5.82174e-11	2.25233e-10	2.09815e-06	2.82406e-10	2.36062e-10	1.10097e-10
D3ZWA8	4.3119e-06	4.0789e-06	2.82836e-06	4.6384e-06	4.12782e-06	1.66032e-06	3.53051e-06	1.87036e-06	2.39733e-06	4.52891e-06	4.26909e-06	2.28211e-06
F1LPG3	3.44141e-06	3.62343e-06	2.57493e-06	3.14029e-06	8.9901e-06	4.41885e-06	8.94715e-06	2.53278e-06	3.38987e-06	4.33816e-06	2.60828e-06	1.25064e-06
F1M9G8	2.58771e-06	3.24859e-06	2.57719e-06	3.76325e-06	3.21559e-06	8.57409e-07	3.1194e-06	1.40114e-06	3.33756e-06	3.66012e-06	2.45555e-06	6.86416e-07
Q5I0D7	2.38829e-06	1.44236e-06	1.88143e-06	7.40545e-07	1.79332e-06	9.3995e-07	1.19328e-06	1.72709e-06	2.45197e-06	1.15957e-06	1.0744e-06	7.80513e-07
Q3KR51	4.40913e-07	1.85919e-10	1.70939e-10	2.55863e-10	1.76358e-10	1.17952e-10	9.4298e-11	2.33451e-10	5.6165e-11	6.88736e-07	1.1914e-06	3.20438e-11
Q27W02	1.34599e-06	1.79403e-06	4.58181e-11	4.35812e-07	8.37577e-11	3.05418e-11	4.93575e-07	2.69872e-11	7.85712e-11	6.56119e-11	2.70053e-10	2.81333e-11
G3V9W6	7.00626e-07	1.4454e-06	1.34371e-10	1.34122e-06	1.32567e-06	7.59428e-07	1.76318e-06	1.41171e-06	4.09229e-06	1.82499e-06	1.64072e-06	1.44514e-06
P07722	1.27501e-05	1.43955e-05	1.72314e-05	1.93782e-05	1.29123e-05	1.44149e-05	1.50403e-05	1.30907e-05	2.06277e-05	1.66211e-05	1.22907e-05	1.43082e-05
G3V6E1	2.07576e-10	7.7005e-11	1.86013e-10	3.11107e-10	2.92617e-10	8.35482e-11	1.30306e-10	1.08277e-05	7.53539e-11	3.71155e-10	1.61753e-10	1.13896e-10
D3ZTX0	1.43057e-10	2.56676e-06	4.56941e-07	6.69717e-11	3.13304e-11	2.35839e-10	1.15192e-10	8.81059e-07	4.88639e-07	7.2859e-12	1.48852e-06	1.03372e-06
F2Z3T8	1.48297e-06	1.32856e-06	3.12971e-06	1.32345e-06	1.15108e-06	1.19641e-10	1.47099e-06	1.98195e-11	2.95156e-06	3.88129e-11	1.39469e-10	2.9458e-06
F1SW39	4.51658e-06	4.70363e-06	4.41473e-06	5.37266e-06	5.38829e-06	1.87086e-06	5.10449e-06	3.88263e-06	2.82672e-06	5.77569e-06	3.88373e-06	2.24972e-06
Q6AY48	1.65922e-05	1.71595e-05	1.55161e-05	1.7419e-05	1.68078e-05	7.99602e-06	1.81507e-05	1.37145e-05	1.39119e-05	1.9508e-05	1.9766e-05	7.40024e-06
Q6DGG1	7.88002e-07	1.73333e-06	7.23497e-12	1.55281e-11	1.00332e-06	2.73431e-07	1.13408e-06	1.76442e-10	2.99558e-07	1.46543e-06	1.51885e-06	2.07456e-07
Q5MJ12	1.30071e-06	1.45275e-06	1.54695e-06	1.29205e-06	1.3887e-06	9.71455e-07	1.3453e-06	9.74578e-07	1.07509e-06	2.56621e-06	2.54742e-06	9.2332e-07
F1LV89	3.31603e-06	2.5825e-06	2.36376e-06	3.44595e-06	3.64057e-06	2.45143e-06	3.06192e-06	2.38296e-06	3.06813e-06	3.8055e-06	3.2664e-06	2.6842e-06
Q5PPH0	3.96637e-06	3.98119e-06	4.69686e-06	3.66022e-06	4.07227e-06	1.55975e-06	3.84978e-06	3.93732e-06	3.98228e-06	3.98135e-06	3.00914e-06	3.81839e-06
F1LW01	5.32354e-06	1.17971e-05	7.4234e-06	9.84354e-06	5.22898e-06	3.69111e-06	1.00416e-05	7.6155e-06	7.08229e-06	6.83276e-06	1.11528e-05	3.76854e-06
B2RYU6	2.24687e-10	8.84803e-11	7.20373e-11	6.89825e-07	1.79433e-10	1.53177e-06	5.52334e-07	6.06088e-11	1.70724e-10	6.8202e-07	4.3653e-07	1.28689e-10
P70587-4	2.2308e-06	2.62782e-06	2.06647e-06	1.84056e-06	2.15767e-06	2.09439e-06	1.84323e-06	2.86011e-06	2.75533e-06	1.43171e-06	2.6383e-06	2.31242e-06
Q4KM49	1.52802e-10	1.50686e-06	1.5074e-06	1.88738e-06	1.79782e-06	4.566e-07	1.15578e-06	1.10516e-06	3.96071e-06	9.48999e-07	1.63037e-06	3.83719e-07
D3ZCI0	2.13751e-06	2.65556e-06	8.78018e-07	1.88895e-06	1.5499e-06	5.59556e-07	1.544e-06	1.31347e-06	8.79776e-07	2.38761e-06	3.05056e-06	1.433e-06
D4A1B8	2.68614e-06	1.61079e-06	1.24909e-10	1.25771e-06	3.32235e-06	2.47729e-06	3.12452e-06	1.68808e-10	3.70861e-06	3.37884e-06	1.33271e-06	1.13371e-10
Q6MGC4	1.32743e-06	3.32181e-06	6.08694e-06	1.29054e-06	1.56072e-06	7.29254e-07	2.10946e-06	1.14971e-06	4.44428e-06	1.93637e-06	1.48996e-06	1.04671e-06
Q4QQV4	7.90723e-07	1.90649e-06	9.40631e-07	1.17912e-06	1.23972e-06	2.19092e-06	8.43035e-07	2.03717e-06	6.82069e-11	3.17965e-07	8.96449e-07	7.54225e-07
P38656	1.83042e-06	1.34613e-06	2.03735e-06	1.27254e-06	1.44305e-06	1.83314e-06	1.72019e-06	2.67451e-06	7.88158e-07	1.92572e-06	2.05634e-06	1.76219e-10
Q6Q7Y5	4.73765e-05	5.81552e-05	8.09201e-05	5.78771e-05	8.79155e-05	8.1325e-06	5.97346e-05	3.28711e-06	0.000182125	6.05197e-05	7.03195e-05	6.46133e-06
Q9WVK7	1.4437e-06	1.31297e-06	6.88478e-06	2.50877e-06	2.42129e-06	3.95958e-07	2.16934e-06	1.48096e-06	2.65484e-06	2.1853e-06	2.27779e-06	2.23381e-06
Q9Z0J8	8.55454e-06	6.05192e-06	5.98071e-06	9.33777e-06	7.18253e-06	4.75044e-06	8.45672e-06	9.30628e-06	6.86096e-06	6.95307e-06	1.01033e-05	5.00271e-06
Q4KLH4	2.18139e-06	2.57876e-06	2.5616e-06	2.91582e-06	2.78905e-06	1.18799e-06	2.67552e-06	2.20863e-06	1.51252e-06	3.72722e-06	2.34071e-06	1.05036e-06
D3ZXL9	1.35639e-06	2.7532e-10	2.54273e-06	1.16996e-06	1.43856e-10	5.09249e-11	4.26263e-12	1.55356e-10	2.05551e-10	1.052e-10	1.34118e-06	6.24564e-11
O88831-2	1.41404e-06	1.63395e-06	1.12555e-11	1.59232e-06	1.19028e-06	1.96248e-06	1.18625e-06	7.28439e-07	1.17834e-10	1.24907e-06	9.84751e-07	1.49381e-10
D4ABI7	1.58348e-06	3.41059e-06	3.28057e-06	6.97012e-06	2.99365e-06	2.22865e-06	3.55428e-06	4.88559e-06	7.29521e-06	3.47909e-06	5.13871e-06	5.36356e-06
F1M8L5	1.62117e-06	1.26031e-06	1.47899e-06	1.02221e-06	2.92745e-06	2.06357e-10	1.32617e-06	9.15251e-07	1.36834e-06	3.55072e-06	2.19349e-10	7.8792e-07
F1LMT5	2.26584e-06	2.71034e-06	1.60512e-06	1.9534e-06	2.5714e-06	4.27113e-06	2.4564e-06	1.79929e-06	9.81017e-07	2.25748e-06	2.05056e-06	6.68585e-11
D4AA35	2.61804e-10	1.69701e-06	1.50745e-10	4.75032e-11	1.8617e-06	5.74574e-11	1.89478e-10	6.169e-07	1.0383e-06	7.33147e-07	1.44455e-06	1.53247e-10
P14942	4.93511e-06	4.21769e-06	2.35118e-06	1.30114e-06	3.94318e-06	3.92612e-06	3.84287e-06	3.72735e-06	6.65348e-06	4.97509e-06	6.7095e-06	4.11631e-06
Q03344	2.65655e-08	7.72957e-06	4.32656e-06	3.54853e-06	7.8392e-06	7.19805e-06	2.11687e-08	7.30923e-06	2.0268e-06	8.77254e-06	8.11142e-07	2.61445e-11
D4A4T0	2.58879e-10	7.03876e-07	1.16455e-10	1.07277e-06	4.29275e-06	3.23718e-07	9.58582e-07	2.27866e-10	4.07449e-11	3.80475e-10	7.09242e-07	1.27893e-06
Q66H20	1.72492e-06	1.57906e-06	1.6413e-06	1.00377e-06	1.52925e-06	1.15874e-06	1.67223e-06	1.28388e-06	1.14031e-06	1.02348e-06	1.51737e-06	7.386e-07
Q3B7U9	1.8974e-06	3.61954e-06	1.6935e-06	2.61735e-06	2.66698e-06	3.53072e-06	1.9445e-06	2.60794e-06	4.68233e-11	2.59948e-06	3.38633e-06	2.58779e-06
F7EN52	2.45331e-06	2.43939e-06	1.81763e-06	2.47428e-06	2.46543e-06	5.51993e-07	2.36399e-06	1.3057e-06	4.13884e-11	2.61173e-06	1.29364e-06	1.10559e-06
F1M9E6	1.46053e-06	9.57458e-07	2.67107e-06	1.39526e-06	1.1076e-06	5.41573e-07	1.97371e-06	2.09384e-06	3.96533e-11	1.74869e-06	1.06187e-06	1.29116e-06
P17425	1.30984e-06	5.22463e-06	2.15189e-06	1.6356e-06	1.09593e-06	7.75516e-07	2.32958e-06	4.17392e-06	3.21969e-06	1.84119e-06	4.85462e-06	1.89948e-06
Q63910	4.78236e-06	2.67782e-05	1.48081e-05	2.68229e-05	1.72302e-05	1.90414e-05	4.7679e-05	9.84014e-05	5.31688e-05	4.64178e-05	5.31224e-05	1.39661e-05
F1MAB9	2.47993e-06	2.46986e-06	2.7293e-06	2.24113e-06	2.68522e-06	2.47971e-06	2.75677e-06	2.20662e-06	1.91323e-06	2.5946e-06	2.94298e-06	1.62005e-06
Q5U1Z9	3.06734e-06	2.67269e-06	2.08236e-06	5.11926e-06	2.21348e-06	8.06264e-07	3.39415e-06	1.34478e-06	1.75282e-06	2.64282e-06	1.85453e-06	9.36917e-07
F1LMU0	6.48826e-11	2.60336e-10	1.27388e-10	1.93766e-10	1.62113e-10	2.5829e-11	2.63257e-10	1.09686e-05	1.09285e-10	2.97753e-10	3.47024e-10	3.72168e-11
Q6XVN8	2.30738e-05	3.02235e-05	3.22852e-05	2.52059e-05	2.66882e-05	1.57469e-05	2.23751e-05	6.80973e-06	2.08146e-05	2.28896e-05	8.70554e-06	1.34207e-05
Q9Z254	1.1208e-06	1.75791e-06	4.8678e-07	1.24637e-06	1.32613e-10	1.23058e-10	5.82963e-07	4.48732e-11	2.07447e-10	4.21459e-11	2.31655e-10	6.22308e-07
Q6P685	1.22828e-06	1.68003e-06	1.78682e-06	1.06495e-06	1.3504e-06	1.18281e-06	1.14667e-06	1.67556e-06	1.16156e-10	1.90658e-06	1.2918e-06	1.12109e-06
D4A9A3	3.36537e-06	2.98391e-06	6.39054e-06	4.27308e-06	3.7976e-06	4.86068e-06	4.08525e-06	2.53421e-06	4.72059e-06	2.79136e-06	3.89095e-06	6.27652e-06
F1LM33	2.74151e-06	2.98844e-06	2.7722e-06	2.1127e-06	2.41918e-06	1.90278e-06	2.06658e-06	1.99283e-06	1.77903e-06	1.3813e-06	1.83163e-06	2.17385e-06
F1LNM3	1.10982e-05	1.21676e-05	1.91895e-05	1.28144e-05	1.15844e-05	7.04003e-06	2.01481e-05	7.55e-06	1.03604e-05	9.65647e-06	2.04461e-05	9.33877e-06
Q64578	1.47847e-05	1.85682e-05	1.6072e-05	1.90838e-05	1.82518e-05	1.58229e-05	1.87473e-05	1.55102e-05	1.14435e-05	2.38532e-05	1.60271e-05	7.6518e-06
O08618	2.73569e-06	1.86337e-06	2.46497e-06	3.07543e-06	5.06188e-06	9.45423e-07	3.72871e-06	2.08054e-06	2.1957e-06	3.06722e-06	1.68744e-06	1.57591e-06
E9PT53	7.61726e-06	2.85903e-06	7.6976e-06	5.17949e-06	6.41057e-06	5.01282e-06	5.94113e-06	2.84633e-06	4.41313e-06	5.90486e-06	4.98489e-06	2.56208e-06
M0R4Q0	4.70865e-05	3.79759e-05	4.22359e-05	3.97012e-05	3.87726e-05	3.67886e-06	4.32675e-05	2.196e-05	3.37091e-05	4.06616e-05	2.75844e-05	1.76677e-05
P13383	4.02023e-06	3.01313e-06	3.54364e-06	3.66345e-06	3.71397e-06	2.88701e-06	3.91198e-06	2.40805e-06	4.83142e-06	4.10158e-06	2.67509e-06	1.95837e-06
Q9NQR8	3.78899e-13	2.69151e-10	1.27627e-06	1.84375e-10	1.73664e-10	8.53679e-11	3.01997e-11	7.53384e-07	2.11837e-10	1.57829e-10	7.7943e-07	3.75409e-11
P08081	2.45474e-05	1.489e-05	1.81546e-05	2.49692e-05	1.67661e-05	1.46773e-05	2.56217e-05	1.99855e-05	1.51071e-05	2.34929e-05	2.54349e-05	1.8403e-05
Q5RJZ6	1.47655e-06	1.20802e-06	4.60005e-06	3.2864e-06	2.97316e-06	2.17022e-06	5.01834e-11	2.23713e-06	2.48545e-06	1.42191e-10	2.96286e-06	4.4907e-06
D3ZX38	1.64275e-10	1.23405e-06	2.18386e-06	6.93211e-07	9.79708e-07	1.21576e-06	1.89359e-06	1.3762e-10	3.13593e-06	9.60934e-07	7.82585e-11	2.34801e-06
G3V940	4.32744e-06	4.22302e-06	4.42675e-06	3.14663e-06	4.23525e-06	4.47771e-06	4.71919e-06	3.45738e-06	5.0831e-06	5.10211e-06	3.29503e-06	4.27266e-06
Q58FK9	1.9752e-06	2.50524e-06	1.09345e-06	1.95618e-06	1.42004e-06	3.36576e-11	1.28071e-06	1.71029e-06	1.4161e-06	1.91729e-06	2.271e-06	2.18832e-10
F1LM69	2.65008e-06	3.18854e-06	3.50245e-06	2.41787e-06	2.87402e-06	3.30256e-07	3.39433e-06	2.00781e-06	2.41817e-06	2.3343e-06	2.62436e-06	1.54388e-06
Q5XIE6	1.51095e-06	2.52791e-06	1.41359e-06	2.15296e-06	2.57235e-06	9.71762e-07	1.93361e-06	2.79815e-06	1.08708e-06	1.637e-06	2.90571e-06	1.13878e-06
G3V949	1.64888e-06	1.42214e-06	6.39859e-06	9.06942e-07	2.22259e-06	3.5632e-06	2.57363e-06	4.91713e-06	8.30894e-07	2.28587e-06	4.99242e-06	1.70789e-06
F1LM19	1.06577e-10	5.62259e-12	1.26421e-10	2.841e-10	1.67486e-10	1.98476e-10	2.01582e-06	3.75781e-06	7.13769e-06	2.13927e-11	2.61608e-10	1.48465e-10
Q6P747	2.39504e-06	1.11098e-06	3.7513e-06	1.75099e-06	2.28573e-06	1.18474e-06	1.39794e-06	1.30243e-06	1.96967e-06	1.45238e-06	3.86144e-06	2.30126e-06
P55063	0.000112998	0.000192612	8.36838e-05	0.000178716	0.000112446	9.30343e-05	0.000204362	0.000160123	0.000163448	0.000227044	0.000191991	4.82117e-05
P41542	3.45856e-06	4.30913e-06	3.49931e-06	3.3837e-06	4.08454e-06	1.49124e-06	3.6427e-06	2.72087e-06	3.00364e-06	4.23568e-06	4.37445e-06	3.11412e-06
Q5FVL2	4.66529e-07	2.01953e-10	2.98569e-11	9.28004e-07	1.09774e-10	4.37148e-07	6.90217e-07	3.07911e-10	1.2504e-06	8.2943e-07	1.06199e-06	2.35859e-11
Q793F9	1.67211e-06	2.05586e-06	1.31074e-06	2.17601e-06	1.37145e-06	7.27727e-07	1.90858e-06	8.07575e-07	1.64351e-06	2.18893e-06	2.16304e-06	1.69033e-06
Q6QI16	1.10703e-06	1.33456e-06	1.25761e-06	2.04206e-06	1.97284e-06	1.47164e-06	2.23842e-06	1.65888e-06	1.68366e-06	2.49367e-06	1.38559e-06	1.23854e-06
B2RZ08	2.18549e-11	8.61364e-12	1.03509e-06	1.35968e-11	1.80662e-10	9.98337e-11	7.31149e-12	3.2118e-10	1.43676e-10	1.64999e-10	2.98472e-10	5.38748e-07
Q07205	3.09936e-06	3.23686e-06	3.38379e-06	2.79012e-06	3.401e-06	2.51209e-06	3.34855e-06	3.47269e-06	2.91671e-06	4.29541e-06	3.31935e-06	1.65802e-06
D3ZA84	1.91304e-06	1.80391e-06	5.24632e-06	2.18074e-06	1.8621e-06	1.37957e-06	1.79871e-06	1.51212e-06	3.00254e-06	1.89349e-06	2.05535e-06	3.63134e-06
D3ZG07	5.20225e-07	1.438e-12	1.63452e-10	4.49313e-07	5.6265e-07	1.12153e-10	2.64341e-10	3.54586e-07	3.44058e-07	6.73047e-07	2.69383e-11	6.87914e-11
P81795	2.51482e-06	2.94893e-06	1.39185e-06	2.21843e-06	2.87838e-06	7.53147e-07	3.10105e-06	1.38286e-06	2.40978e-06	2.61743e-06	2.42067e-06	8.3232e-07
D4A055	5.53546e-07	1.0779e-06	1.63035e-06	5.17497e-07	9.351e-07	2.8875e-07	8.33213e-07	7.48844e-07	8.51724e-07	9.78824e-07	1.44914e-06	3.73378e-07
Q62625-2	1.98089e-05	2.68904e-05	3.31107e-05	2.29775e-05	2.36309e-05	1.38588e-05	2.09408e-05	5.79457e-06	1.87093e-05	2.06844e-05	1.06886e-05	1.43473e-05
Q63584	3.08117e-06	2.67965e-06	2.77588e-06	2.49964e-06	2.51667e-06	6.25991e-07	2.24835e-06	1.37691e-06	1.61428e-10	2.12197e-06	2.37456e-06	4.41274e-07
B2GV38	4.29671e-11	1.68879e-10	1.2373e-10	2.21478e-06	2.07074e-10	1.93004e-10	1.50912e-10	7.85114e-11	9.93114e-11	3.5854e-10	9.67873e-12	2.15889e-07
G3V9Y9	1.96027e-10	1.24531e-10	1.81207e-10	2.77279e-10	2.86088e-10	4.72173e-06	1.82702e-07	2.296e-10	8.55804e-11	3.23491e-07	2.28041e-10	2.63792e-11
D3ZPR0	2.68809e-06	7.916e-05	6.78118e-05	1.16339e-06	2.86886e-06	1.45958e-06	2.82929e-06	9.51159e-07	3.47378e-06	2.63429e-06	1.4369e-06	2.75225e-07
D3ZE85	1.73248e-06	2.19419e-06	1.89821e-06	2.40721e-06	1.86221e-06	2.0884e-06	1.45885e-06	1.27189e-06	2.24588e-06	2.04863e-06	2.94148e-06	5.89386e-07
M0RCH6	4.68208e-06	3.69186e-06	3.53569e-06	3.96916e-06	4.57675e-06	3.09719e-06	3.83787e-06	3.32868e-06	4.61631e-06	6.17449e-06	5.50723e-06	3.33837e-06
R9PXU9	2.25248e-10	1.22849e-10	1.10744e-06	3.91862e-11	2.79997e-10	7.59815e-11	2.68676e-10	2.9811e-10	3.2787e-07	1.89268e-07	4.43917e-11	3.57659e-07
F1LSG0	3.55297e-06	1.10842e-06	1.50657e-06	1.63861e-06	6.33286e-06	1.54623e-06	3.58682e-07	6.35321e-06	8.55277e-07	9.36625e-07	1.45333e-06	4.03452e-11
B0BNA7	1.58266e-06	1.42872e-06	1.73583e-06	1.69268e-06	1.18017e-06	1.76328e-06	1.88417e-06	1.15525e-06	1.52464e-06	2.05508e-06	8.60934e-07	1.86207e-06
G3V9M3	2.36609e-06	2.05097e-06	1.73279e-06	2.51684e-06	3.97273e-06	1.55978e-06	2.47694e-06	1.59997e-06	1.61143e-06	2.09075e-06	3.60872e-06	7.70689e-07
Q5XIC6	2.2037e-06	2.24429e-06	2.89334e-06	1.79188e-06	2.00119e-06	1.19374e-06	1.97567e-06	1.90416e-06	1.80858e-06	2.07056e-06	1.31645e-06	2.51618e-06
Q01728-2	5.92289e-06	5.79485e-06	4.38719e-06	6.04101e-06	5.32114e-06	5.29832e-06	6.23176e-06	5.16168e-06	3.80074e-06	6.57997e-06	7.08245e-06	4.63549e-06
O55171	1.55621e-06	1.54462e-06	3.42301e-11	1.71633e-06	1.53247e-06	1.50284e-06	2.26697e-06	8.84636e-07	9.56535e-07	1.8081e-06	1.56475e-06	9.79512e-07
A0A0A0MXU2	1.91036e-06	3.55941e-06	2.59728e-06	2.61915e-06	2.39482e-06	1.19545e-06	2.50275e-06	1.48535e-06	1.22375e-06	2.20031e-06	2.24981e-06	1.56327e-06
P70500	2.16091e-06	1.89384e-06	1.87544e-06	2.6768e-06	3.18145e-06	2.45825e-06	2.20034e-06	2.77724e-10	1.31307e-06	2.33001e-06	5.56571e-11	1.4838e-06
Q9JMJ4	1.60854e-06	3.3715e-06	4.52488e-06	2.84281e-06	1.80276e-06	5.60662e-07	2.16127e-06	1.72147e-06	3.87578e-06	1.80122e-06	2.46259e-06	1.14449e-06
F7F801	1.18277e-10	3.05119e-05	8.88047e-11	8.06776e-11	3.60112e-05	4.66338e-05	4.70831e-05	2.13794e-05	3.19595e-05	5.19588e-05	9.55311e-06	2.00095e-05
P20650	1.63483e-06	1.97857e-06	8.74538e-07	1.20808e-06	1.6428e-06	1.54607e-06	1.56147e-06	2.91109e-10	1.56124e-06	2.36743e-06	1.46615e-06	1.24052e-10
G3V7W1	3.12594e-06	2.89724e-06	2.66725e-06	3.20239e-06	3.19324e-06	1.34435e-06	3.13771e-06	2.50806e-06	1.07574e-06	3.2106e-06	2.82778e-06	1.84561e-06
G3V7V9	2.75474e-10	1.28008e-06	1.93037e-10	1.112e-06	9.52159e-07	1.67115e-06	1.00906e-06	1.66791e-10	1.15926e-10	1.22064e-06	1.2537e-06	9.92113e-07
Q6AXT5	2.95656e-06	3.21474e-06	2.41695e-06	3.10091e-06	3.07997e-06	2.68118e-06	3.01569e-06	2.6075e-06	2.29623e-06	3.41615e-06	2.84927e-06	2.4782e-06
Q5XI64	1.47941e-06	1.49639e-06	1.36682e-06	1.44748e-06	1.31094e-06	6.45993e-07	1.34463e-06	1.46013e-06	1.73286e-10	1.39715e-06	1.30091e-06	6.78561e-07
Q99P34	2.19056e-06	2.89667e-06	2.0741e-06	2.57053e-06	1.52013e-06	1.12683e-06	3.22621e-06	1.68781e-06	1.7833e-06	2.59671e-06	3.08446e-06	8.6589e-07
F1LMC0	1.0882e-10	1.36179e-06	2.6874e-06	1.83487e-10	2.94184e-06	1.7612e-07	2.69832e-10	1.70264e-06	2.18904e-06	1.044e-06	2.68324e-06	1.83616e-06
Q792H5-2	5.09397e-06	5.16683e-06	1.97665e-06	4.13853e-06	2.98828e-06	3.19305e-06	5.61802e-06	2.54891e-06	1.716e-06	4.24766e-06	5.0736e-06	1.62093e-06
B1WC34	3.47714e-06	4.15315e-06	2.40788e-06	3.6866e-06	3.01654e-06	3.14447e-06	3.4305e-06	3.08269e-06	2.54737e-06	3.36345e-06	3.16738e-06	3.58728e-06
P55770	2.21732e-11	2.66174e-10	6.36839e-12	7.05665e-07	8.15891e-07	1.67129e-06	1.73092e-10	1.39783e-06	2.25522e-10	3.28156e-10	2.66103e-10	1.21807e-10
Q4KM31	9.94836e-11	1.08397e-10	8.33029e-11	2.16225e-10	2.02755e-10	3.73861e-06	1.44915e-10	2.0408e-10	1.09549e-10	3.06822e-10	2.56442e-10	1.74196e-10
D3Z9G3	1.01079e-05	9.83299e-06	8.04565e-06	7.49599e-06	1.31062e-05	1.16477e-05	1.16971e-05	6.63052e-06	5.85461e-06	1.00494e-05	1.15304e-05	3.67019e-06
M0RD75	6.91392e-06	8.21318e-06	1.02867e-05	7.02617e-06	5.95995e-06	8.77004e-06	7.39376e-06	5.33365e-06	8.28644e-06	6.76104e-06	7.08591e-06	7.05122e-06
F1M8K1	6.40999e-06	6.17171e-06	4.80384e-06	5.81823e-06	3.71435e-06	3.85373e-06	6.84392e-06	4.85352e-06	4.91584e-06	5.38684e-06	8.10328e-06	5.0262e-06
Q6AYG3	1.59564e-06	1.61561e-06	1.77365e-06	1.31039e-06	1.79474e-06	1.19544e-06	1.42776e-06	6.50181e-07	4.01517e-07	1.38026e-06	4.83746e-07	8.0653e-07
D3ZLP4	0.000484363	0.000454536	0.000466824	0.00048049	0.000479833	0.000343962	0.000464821	0.000272527	0.000510346	0.000489825	0.000358842	0.000251964
P00564	4.32096e-05	3.14602e-05	2.3797e-05	2.17352e-05	3.59423e-05	1.16503e-05	2.91609e-05	1.13418e-05	2.29735e-05	3.7419e-05	4.49239e-05	3.08356e-05
R9PXU4	2.14988e-06	4.71804e-06	1.51551e-10	1.03432e-10	4.04602e-06	1.30589e-06	1.78963e-06	2.23324e-06	7.28419e-07	3.8284e-06	2.03163e-06	6.3496e-07
P25235	2.58022e-06	3.19164e-06	2.75293e-06	2.74032e-06	3.63062e-06	2.66987e-06	2.86223e-06	3.74114e-06	3.56449e-06	2.02411e-06	2.45033e-06	2.87279e-06
Q08602	3.84496e-06	2.09965e-06	2.83591e-06	5.49528e-06	1.94326e-06	7.03145e-07	4.73477e-06	2.56031e-06	2.03098e-06	4.97169e-06	2.14241e-06	1.24871e-06
Q63569	1.8703e-06	5.88097e-06	3.47355e-06	4.50745e-06	5.29222e-06	1.38536e-06	3.05183e-06	4.29542e-06	4.36747e-06	5.85066e-06	5.09198e-06	3.73993e-06
P08592-2	3.15185e-06	3.4605e-06	1.72584e-06	3.88642e-06	3.45192e-06	2.82022e-06	3.79793e-06	4.68299e-06	5.2154e-06	4.90373e-06	4.69899e-06	3.1482e-06
M0R608	1.65575e-05	1.82406e-05	2.14625e-05	1.94942e-05	1.82163e-05	1.19864e-05	1.58804e-05	1.13524e-05	1.58032e-05	1.61272e-05	1.28272e-05	1.50378e-05
B5DFK6	4.37185e-06	4.87694e-06	4.4901e-06	4.78868e-06	4.6949e-06	3.38444e-06	4.72708e-06	4.27409e-06	4.1076e-06	4.47248e-06	5.6324e-06	3.75468e-06
Q3MHS7	6.79708e-07	1.32057e-06	9.40587e-07	4.5625e-07	1.13287e-06	1.50588e-10	1.05731e-06	8.00725e-07	9.22309e-07	1.27047e-06	1.43264e-06	7.46795e-11
Q56R18	1.76453e-06	1.73851e-06	3.4869e-06	3.51436e-06	1.57588e-06	2.19268e-06	4.79498e-06	7.53136e-07	2.21533e-06	1.63861e-06	1.51236e-06	2.5251e-06
P16409	7.04212e-06	7.43534e-07	8.57795e-06	7.40876e-06	1.29977e-10	3.4216e-06	8.6452e-06	2.44654e-06	8.18003e-06	9.21708e-06	5.47051e-11	5.64462e-06
Q5RKG9	5.71241e-06	4.16819e-06	5.68237e-06	5.66607e-06	5.18163e-06	4.82089e-06	5.20993e-06	4.17619e-06	5.50121e-06	4.15772e-06	5.57441e-06	6.56918e-06
A9UMV7	2.94829e-10	2.24674e-10	1.03537e-10	1.92661e-11	2.07806e-10	1.68114e-06	1.31665e-10	3.22147e-10	1.11158e-10	2.59696e-10	5.50225e-11	1.38655e-11
Q4V7C6	1.19353e-05	1.72031e-06	1.76334e-06	2.58344e-06	1.45201e-06	4.99074e-07	2.24237e-06	1.6583e-06	7.56815e-07	5.91774e-07	2.64042e-06	5.49963e-07
M0R7U1	2.81625e-06	3.63122e-06	4.5545e-06	3.1419e-06	2.68903e-06	2.60522e-06	4.40537e-06	3.28234e-06	2.73851e-06	2.30876e-06	2.35828e-06	2.71518e-06
Q5U2X6	4.79895e-07	1.57974e-06	6.46109e-11	1.07264e-10	1.55011e-06	7.1596e-11	6.64249e-07	9.27406e-07	2.16364e-11	8.62217e-07	1.28079e-06	1.4099e-07
D4AA00	2.9592e-10	2.59905e-10	1.09277e-05	1.01018e-10	2.03267e-10	2.29974e-10	1.4753e-11	2.77924e-10	7.5216e-11	2.78105e-10	2.63565e-11	1.54867e-10
Q4V7A0	5.31216e-11	1.86066e-06	2.61979e-06	9.30751e-11	1.51088e-06	9.95981e-11	1.01251e-06	2.13648e-10	4.03083e-11	4.7822e-07	2.07079e-10	1.69012e-10
Q566R0	2.53882e-06	2.87084e-06	2.72172e-06	3.17055e-06	3.23786e-06	1.6612e-06	2.80675e-06	1.81133e-06	2.37021e-06	3.65122e-06	3.41312e-06	1.74983e-06
P09456	3.52575e-06	3.72951e-06	4.35608e-06	3.45741e-06	2.51253e-06	3.56415e-06	3.66951e-06	3.32144e-06	5.84272e-06	3.81805e-06	2.92545e-06	1.52014e-06
D3ZD11	1.99159e-06	1.15618e-06	2.32038e-06	1.81886e-06	1.49282e-06	1.12639e-06	1.58381e-06	1.39498e-06	1.83867e-06	1.26404e-06	1.69944e-06	2.3623e-06
G3V762	5.5113e-06	6.00021e-06	1.08933e-06	1.50977e-06	1.46865e-06	1.59507e-07	7.62857e-06	2.23832e-06	6.14355e-07	5.45566e-06	1.2509e-06	5.93326e-07
Q924S1	2.02217e-06	3.65456e-06	1.71501e-06	2.79671e-06	9.03618e-07	6.72688e-07	1.80065e-06	6.37221e-07	2.33411e-06	2.55042e-06	1.70646e-06	1.29983e-06
B2RZ37	3.40838e-06	4.46821e-06	3.39382e-06	5.04154e-06	5.21596e-06	1.26226e-10	3.78232e-06	2.71513e-06	3.91734e-06	5.06326e-06	4.23158e-06	1.97254e-06
P97538	4.5491e-07	9.72787e-07	3.92992e-06	7.44206e-07	7.56905e-07	8.45213e-07	8.05364e-07	1.94506e-06	1.6118e-06	7.94818e-07	8.78853e-07	2.15049e-06
Q566Q8	8.99354e-11	2.5375e-10	1.37384e-10	7.96029e-11	1.37882e-06	3.42469e-07	4.42591e-11	3.09026e-07	2.47158e-11	2.61974e-06	1.60149e-10	2.21078e-10
Q99068	8.68629e-07	1.18592e-10	3.8301e-11	3.06933e-10	2.89909e-10	2.01985e-10	2.18089e-06	3.76223e-07	1.29903e-06	3.80688e-10	2.39835e-10	7.19198e-11
D3ZZK3	1.44602e-06	4.36516e-06	4.08043e-06	2.21928e-06	5.66187e-06	3.1407e-06	1.89491e-06	4.98795e-06	3.54936e-06	2.19098e-06	1.69193e-06	1.43578e-06
O08629	5.81282e-07	1.04234e-06	1.77307e-06	1.82466e-06	1.42441e-06	1.66794e-06	1.46444e-06	6.94999e-07	1.56406e-06	4.04942e-06	3.1864e-06	1.00906e-06
Q6YH22	3.21458e-11	1.54974e-10	7.94335e-11	1.72429e-10	3.14036e-11	5.11736e-11	2.05184e-11	3.30102e-06	4.59615e-14	1.15664e-10	1.73512e-10	8.96735e-11
D4ADD7	4.51332e-06	8.55871e-06	3.11663e-06	5.59299e-06	4.88072e-06	1.91907e-06	7.37051e-06	1.2606e-06	2.50518e-07	6.27165e-06	2.18902e-06	2.16794e-07
P17136	1.28791e-06	1.50476e-06	2.36542e-06	1.35674e-06	1.6202e-06	1.10516e-06	1.72632e-06	1.05036e-06	2.37495e-06	1.8032e-06	1.37559e-06	8.88408e-07
F6SF42	2.53711e-11	2.21107e-10	7.4103e-11	2.27813e-10	6.21045e-11	7.74608e-11	1.06652e-10	2.13531e-11	1.02195e-10	2.20844e-10	6.08828e-06	5.43225e-11
Q6AY30	4.66604e-06	4.24159e-06	5.40458e-06	3.04804e-06	3.74951e-06	1.12647e-06	4.54135e-06	1.38933e-06	5.55342e-06	3.20662e-06	2.58625e-06	2.63851e-06
A0A0A0MXZ0	2.90706e-10	1.49926e-10	4.92958e-07	1.10472e-10	1.29582e-10	1.31698e-10	8.26661e-11	9.02662e-07	4.33532e-11	1.34091e-06	1.40544e-10	1.32521e-10
P63322	9.82165e-06	1.26827e-05	1.27353e-05	1.20871e-05	6.87915e-06	6.88077e-06	7.33671e-06	7.84368e-06	1.16599e-05	8.0248e-06	8.59257e-06	7.22058e-06
F7F379	2.90463e-06	2.56854e-06	2.64381e-06	2.9804e-06	2.33715e-06	2.30762e-06	1.5455e-06	2.64685e-06	2.60753e-06	2.95615e-06	3.14706e-06	3.29029e-06
P40241	1.40182e-05	3.13472e-05	1.66091e-05	3.66682e-05	3.01686e-05	1.37685e-05	2.90548e-05	1.61423e-10	1.56873e-05	1.73006e-05	1.65407e-05	2.66132e-07
Q9JHZ4	1.4333e-06	2.17837e-06	1.36634e-06	1.65607e-10	1.96593e-06	4.54273e-07	7.167e-12	1.22163e-06	1.94693e-10	2.84325e-10	1.65096e-06	1.26275e-06
F1M787	1.24472e-06	1.6883e-06	2.89827e-06	1.94445e-06	1.91146e-06	8.95506e-07	3.39672e-06	2.21992e-06	9.18247e-07	4.18475e-06	2.11722e-06	1.18027e-06
Q64640	1.7196e-06	2.68122e-06	4.74626e-06	4.16101e-06	2.88529e-06	2.23051e-06	3.23578e-06	3.88481e-07	3.79875e-06	2.52109e-06	2.0721e-06	2.89915e-06
Q9WU70-3	4.48862e-06	3.52322e-06	4.98683e-06	5.48592e-06	4.07241e-06	1.97166e-06	3.26452e-06	4.4464e-06	3.75247e-06	4.95304e-06	5.09712e-06	2.55305e-06
P81377	5.50578e-06	5.44194e-06	3.91191e-06	3.07003e-06	3.8688e-06	3.56415e-06	3.08622e-06	3.06419e-06	4.0412e-06	3.18143e-06	2.61013e-06	1.12714e-06
Q6AXY0	6.36704e-06	4.02984e-06	1.2627e-05	6.22076e-06	7.58897e-06	4.24806e-06	8.8534e-06	3.42135e-06	1.08449e-05	5.16238e-06	9.23053e-06	6.11103e-06
M0R9L2	1.67367e-10	2.54929e-10	1.34074e-06	1.27246e-10	1.82576e-06	1.34205e-06	1.7838e-10	3.70535e-06	2.23443e-06	1.2885e-06	2.29643e-06	1.49021e-06
E9PSS1	4.53565e-06	5.00967e-06	4.34279e-06	1.47877e-06	3.29885e-06	2.55287e-06	4.26223e-06	1.1673e-06	3.7855e-06	3.86885e-06	4.26187e-06	1.93785e-06
D4A6F2	2.36984e-06	2.85678e-06	2.4771e-06	3.22478e-06	2.86707e-06	3.42298e-06	3.11278e-06	2.47607e-06	2.39696e-06	2.66519e-06	3.29821e-06	1.93337e-06
O70257	1.39905e-10	7.60152e-06	1.66152e-10	2.62716e-10	2.55577e-10	1.84293e-06	6.95469e-06	2.6955e-06	3.41693e-06	2.88522e-06	2.49686e-06	2.7332e-06
F1LT49	1.77888e-06	1.49964e-06	1.79706e-06	1.75666e-06	1.7618e-06	1.08874e-06	1.05101e-06	1.51774e-06	1.70614e-06	1.50182e-06	1.45903e-06	6.91399e-07
G3V879	2.93374e-10	9.49369e-11	3.70987e-07	4.11584e-07	2.00939e-10	6.73937e-11	2.15877e-11	1.33386e-10	3.77797e-07	2.1164e-10	5.65044e-07	4.03033e-07
Q62639	1.75314e-06	1.76407e-06	1.73518e-11	1.71149e-06	1.31845e-06	1.00482e-06	2.04877e-06	7.10692e-07	7.37264e-07	9.03375e-11	8.13929e-07	1.84075e-07
Q76MV3	7.96731e-07	8.12184e-11	5.64548e-07	8.56615e-12	6.57246e-07	3.22044e-12	7.785e-07	1.81526e-11	1.75975e-10	7.0732e-07	3.40677e-10	4.95663e-07
P43278	2.69275e-06	6.35309e-06	5.65463e-06	4.11463e-06	4.81487e-06	1.23976e-06	5.82358e-06	2.25368e-06	1.55293e-10	4.25615e-06	5.59655e-06	3.09226e-06
Q4V8B7	2.59424e-10	1.27155e-06	1.36336e-11	2.27065e-10	2.50468e-10	1.03607e-06	1.78612e-06	1.30752e-10	1.55235e-10	1.7163e-06	4.11489e-07	1.81882e-06
P97521	1.67535e-06	1.42014e-06	2.272e-06	2.19589e-10	9.22637e-11	1.69412e-06	1.50909e-06	1.04187e-06	2.11234e-06	1.4922e-06	1.62355e-06	2.06658e-06
B1WC83	2.63895e-10	6.92686e-11	4.73095e-11	2.06662e-10	1.93546e-11	2.30497e-10	1.53624e-06	2.26966e-10	5.93938e-11	1.48528e-10	2.63283e-10	6.12944e-11
B2GV74	4.35863e-06	4.38706e-06	3.73079e-06	4.34129e-06	1.16848e-06	2.71698e-06	4.1644e-06	2.18182e-10	4.59836e-06	4.11537e-06	2.24533e-10	4.96233e-07
Q5EB62	9.81981e-07	2.3114e-06	1.37268e-06	1.34558e-06	2.22183e-10	1.65481e-06	1.26867e-10	2.69822e-10	1.08561e-10	8.8241e-07	4.18883e-11	1.21203e-10
Q91V33	1.02224e-06	3.55312e-06	2.2049e-06	2.23064e-06	2.72541e-06	2.37392e-06	3.76716e-06	1.85897e-06	3.15439e-06	3.79592e-06	2.13009e-06	1.43357e-06
Q9WV48-3	2.18768e-06	3.02461e-06	3.19478e-06	2.46441e-06	1.89169e-06	2.08906e-06	2.67804e-06	1.68213e-06	3.33029e-06	2.74445e-06	2.97595e-06	1.41425e-06
P47863-2	1.00547e-05	1.69042e-05	1.51951e-05	1.28907e-05	1.43825e-05	6.02069e-06	1.64791e-05	1.25954e-05	2.44793e-05	1.18633e-05	1.58482e-05	1.42254e-05
Q9ES53	1.22458e-07	1.3245e-06	6.37558e-07	2.04719e-06	1.64722e-06	2.86464e-07	2.74658e-10	1.80294e-06	8.21562e-12	1.52523e-06	9.44262e-07	2.98351e-07
G3V9N0	4.48378e-06	5.62358e-06	2.96251e-11	4.10524e-06	5.42984e-06	2.60548e-06	5.30113e-06	5.99003e-06	5.12848e-06	5.19188e-06	5.24493e-06	4.97528e-11
D4AD03	3.00635e-06	6.29181e-06	2.33546e-06	2.17619e-06	3.08355e-06	2.6477e-06	6.17766e-06	2.19464e-06	6.11351e-06	2.9779e-06	9.05527e-07	6.36159e-06
G3V7G8	6.01005e-07	1.40659e-06	2.74854e-06	1.16624e-10	1.93511e-06	2.00202e-06	1.81679e-06	2.66246e-06	3.48704e-06	1.88651e-06	1.74268e-06	1.22708e-06
Q5M819	1.22063e-06	2.54627e-10	8.38323e-07	1.34672e-06	9.84335e-07	1.62261e-06	2.36973e-12	1.10213e-06	1.83099e-10	2.02432e-06	8.22733e-07	2.04579e-07
B2RYS6	1.17832e-06	2.65122e-06	2.05038e-06	1.01354e-06	2.87051e-06	1.86188e-06	2.3015e-06	2.48336e-06	1.55211e-06	2.85111e-06	2.40495e-06	1.79479e-06
M0R7B4	3.53469e-05	3.7677e-05	3.24532e-05	3.80683e-05	3.84376e-05	1.39143e-05	3.51107e-05	1.17105e-05	1.86996e-05	2.45432e-05	4.64549e-05	2.27163e-05
Q9Z2X5	4.75093e-06	3.63777e-06	2.92478e-06	2.51896e-06	3.10779e-06	1.29676e-06	3.33078e-06	2.28475e-06	2.84204e-06	3.38785e-06	3.12414e-06	2.43585e-06
P57113	2.83083e-10	4.75979e-11	1.60822e-11	1.5721e-06	1.35365e-10	2.17085e-06	1.30292e-10	2.40385e-10	2.14521e-06	3.87006e-10	2.1579e-06	6.78294e-07
D4A8P9	2.62874e-06	3.29819e-06	2.93043e-06	3.13856e-06	3.40861e-06	7.9706e-07	2.87813e-06	1.8015e-06	2.26923e-06	2.6635e-06	2.84881e-06	2.55273e-06
Q66H80	1.39474e-06	1.39837e-06	1.83671e-06	6.54778e-07	6.45992e-07	8.35898e-07	8.16201e-07	1.97662e-10	2.01656e-10	1.90267e-06	1.3852e-06	1.15497e-06
P29066	1.92223e-10	2.36388e-06	2.13081e-06	2.50007e-10	2.98636e-06	2.42598e-06	2.94659e-06	2.24008e-06	1.9377e-06	2.99147e-06	2.97674e-06	2.24514e-06
Q6JE36	1.79253e-06	1.26755e-06	1.56321e-06	1.72215e-06	1.59962e-06	2.05773e-06	1.49158e-06	9.77308e-11	2.30718e-06	1.31528e-06	8.43578e-07	2.8427e-06
B0BN94	2.85159e-10	2.10742e-06	1.51955e-11	7.64724e-12	2.8212e-11	1.43144e-06	6.59046e-11	2.11281e-10	1.68776e-06	3.74158e-10	1.21187e-10	3.32505e-11
D4A746	1.49983e-10	6.60187e-11	1.3653e-06	1.35189e-11	1.64807e-10	1.24793e-06	7.94814e-07	7.97449e-11	1.50731e-06	1.68487e-06	9.02495e-07	8.80447e-07
D3ZGE0	1.47253e-06	1.23012e-06	1.54918e-06	1.71524e-06	1.35446e-06	9.19944e-07	1.36293e-06	1.08824e-06	1.03947e-06	1.3922e-06	1.14302e-06	9.53235e-07
B5DFI3	2.21004e-10	2.31822e-06	2.2411e-06	1.48911e-10	4.67107e-06	1.18083e-10	1.76155e-10	5.01845e-06	1.22846e-06	2.84073e-10	5.1625e-06	7.21028e-07
Q9Z142	3.44381e-06	1.94893e-06	5.97504e-07	9.2677e-07	1.44823e-10	1.05869e-10	1.50091e-06	2.92885e-07	1.52075e-10	1.64677e-06	3.40166e-10	5.06019e-11
F8WFR6	1.20786e-06	1.95994e-06	1.68198e-10	1.15872e-06	2.73802e-06	1.45182e-11	2.27912e-06	2.71046e-06	1.06338e-06	2.32522e-06	1.08398e-06	7.52046e-11
Q9EST6	3.35136e-06	3.5839e-06	3.31465e-06	4.37257e-06	4.15652e-06	3.16126e-06	4.08248e-06	3.80946e-06	3.99951e-06	4.85261e-06	5.06524e-06	3.39227e-06
D3ZXK4	7.9191e-07	1.51565e-10	1.60147e-10	1.0485e-10	7.96037e-07	5.80203e-11	4.8435e-11	2.19532e-10	1.1979e-06	6.81891e-11	3.25498e-10	2.55524e-11
Q01066	2.10486e-10	2.36422e-06	1.09043e-06	1.95885e-10	1.58588e-06	7.29182e-12	8.11079e-07	1.90247e-06	2.04654e-06	3.85707e-10	2.04548e-06	1.21241e-06
Q9JLZ1	1.49969e-06	3.4328e-06	4.14282e-06	1.68401e-06	3.32022e-06	7.19087e-07	3.13153e-06	3.67199e-06	3.27038e-06	3.85335e-06	2.62603e-06	1.65816e-06
Q812E9	4.62522e-05	5.10773e-05	4.25919e-05	5.14828e-05	3.6026e-05	3.96952e-05	4.57584e-05	2.97261e-05	4.23037e-05	7.67915e-05	5.08916e-05	3.94511e-05
Q4KM45	9.38041e-07	1.38365e-10	5.37998e-07	2.52624e-11	8.47014e-07	1.20308e-11	1.21536e-10	2.08214e-10	1.50202e-10	6.64363e-07	1.55071e-10	6.48027e-12
F1LP01	2.27231e-06	2.86857e-06	2.67031e-06	2.54954e-06	2.54012e-06	2.9063e-06	2.44659e-06	3.62202e-06	2.59309e-06	2.0703e-06	2.71657e-06	2.97928e-06
Q4KM69	3.3219e-06	2.60222e-06	1.17673e-06	3.17047e-06	1.67451e-06	1.72254e-06	3.32801e-06	1.66069e-06	1.30175e-06	2.74905e-06	3.10632e-06	1.34574e-06
D3ZUY0	5.70994e-07	1.54082e-10	7.0327e-07	6.85603e-07	9.9731e-07	1.53887e-10	2.58812e-07	5.25915e-07	5.24954e-07	4.71403e-07	1.34448e-06	4.53444e-07
A0A096MKH2	1.9335e-06	2.85269e-06	2.4711e-06	3.47318e-11	3.2113e-06	2.456e-06	5.37525e-11	4.28229e-11	2.46094e-06	3.50983e-10	2.01507e-06	1.98238e-06
F1M4R7	1.99401e-06	2.73307e-06	3.23199e-06	3.80949e-06	2.37765e-06	2.08947e-06	1.55384e-06	1.64812e-06	6.46312e-06	2.31813e-06	1.92193e-06	2.04884e-06
P62168	1.73875e-06	2.26911e-06	9.64831e-11	2.60267e-06	1.01264e-06	2.20064e-11	1.42343e-10	2.47434e-06	4.81562e-11	1.75868e-06	3.82265e-06	3.60996e-11
Q499N5	1.85523e-06	1.68004e-06	4.97883e-11	1.70165e-06	1.60014e-06	8.86215e-07	1.68748e-06	8.49507e-07	1.21969e-06	1.39794e-06	1.30194e-06	9.58706e-07
P23711	1.85261e-06	2.35452e-06	1.22215e-06	1.4602e-06	2.95509e-06	8.58406e-07	2.23178e-06	2.05607e-06	2.28533e-06	1.99974e-06	1.3778e-06	1.82575e-06
D3ZCA0	1.48255e-06	2.94861e-06	6.26596e-06	4.68463e-06	3.15841e-06	1.02861e-06	5.28905e-06	1.65127e-06	5.11986e-06	3.03945e-06	9.67413e-07	3.92933e-06
A0A096MJY3	2.97215e-06	2.09825e-06	1.48024e-06	4.49462e-07	1.64378e-06	3.85537e-11	3.69429e-06	2.45198e-06	9.70248e-11	3.56327e-06	1.47902e-06	2.42082e-06
G3V8Z9	1.64942e-10	2.7985e-10	1.10953e-10	2.33046e-10	2.39864e-06	1.9621e-06	3.86238e-11	1.9963e-06	2.20753e-10	3.37903e-10	4.86229e-11	1.78084e-10
Q9JKS6-2	6.33121e-06	7.3586e-06	5.03875e-06	6.47958e-06	5.74546e-06	6.68328e-06	6.44303e-06	5.62576e-06	4.75357e-06	7.27553e-06	9.19591e-06	4.84275e-06
A0A096MIZ1	9.2211e-07	2.94852e-06	1.46729e-06	3.51801e-06	3.00705e-06	4.69613e-06	3.25221e-06	3.11103e-06	2.42234e-06	3.06946e-06	4.26008e-06	1.54107e-06
B2RYU7	1.92284e-10	9.79476e-07	8.82923e-07	9.9783e-07	9.36536e-07	2.45133e-10	1.0741e-06	8.12573e-07	7.15757e-07	1.23641e-06	1.27498e-10	6.00719e-07
G3V7X5	2.1357e-06	1.26549e-06	2.67139e-06	1.65696e-06	2.17988e-06	9.42219e-07	2.28025e-06	9.64002e-07	1.21754e-06	1.01193e-06	1.89161e-06	7.8239e-07
D4A1A5	3.53259e-06	4.08573e-06	3.61853e-06	3.67441e-06	4.16944e-06	2.44196e-06	3.69542e-06	3.8098e-06	2.71324e-06	3.80661e-06	2.96195e-06	1.81138e-06
Q9JLJ3	6.14522e-06	4.63731e-06	6.03109e-06	6.33029e-06	5.86112e-06	5.47216e-06	6.0468e-06	4.71585e-06	4.84763e-06	4.92281e-06	6.27254e-06	4.34507e-06
G3V8G2	1.15036e-06	1.63025e-06	9.63411e-07	1.32613e-06	1.86464e-06	5.27319e-07	1.67074e-06	6.15643e-07	1.05412e-06	1.4e-06	8.59754e-07	6.56604e-07
D3ZAN1	3.3459e-06	2.38465e-06	2.9154e-06	2.72635e-06	2.59002e-06	1.18646e-06	2.51599e-06	1.89912e-06	1.25011e-06	2.68424e-06	2.34074e-06	2.19812e-06
D4A4W6	1.77794e-10	1.90833e-06	2.67495e-06	2.42582e-06	1.64397e-06	1.99576e-10	1.6644e-06	1.91344e-10	1.99099e-06	1.21626e-06	1.93398e-11	1.21293e-10
P16290	2.37108e-05	2.41059e-05	6.67577e-05	2.51091e-05	3.37373e-05	8.38648e-05	3.88375e-05	4.57831e-05	4.60024e-05	4.50265e-05	7.86426e-05	6.73516e-05
P63249	2.8155e-06	1.66585e-06	2.91477e-06	2.79608e-06	2.44695e-06	2.1845e-06	2.46635e-06	1.1885e-06	2.02313e-06	1.91922e-06	1.96718e-06	2.70907e-06
G3V6L8	3.91369e-06	3.17652e-06	2.66855e-06	3.54876e-06	2.87825e-06	1.92924e-06	4.05723e-06	2.171e-06	2.87353e-06	3.68128e-06	2.8909e-06	1.27108e-06
O70196	1.57777e-06	1.05377e-06	1.24469e-06	1.26986e-06	9.50161e-12	1.82094e-05	1.40229e-06	1.24826e-06	2.57217e-06	1.22438e-06	8.53305e-07	4.29502e-07
F1LRV6	2.1336e-06	1.4737e-06	2.76716e-06	3.294e-06	1.37937e-06	4.16106e-06	1.68283e-06	1.37228e-06	3.80241e-06	3.16625e-06	2.41415e-06	2.02955e-10
P02803	1.25476e-10	2.56727e-10	1.17664e-10	1.61231e-10	4.65711e-11	2.31296e-10	1.96413e-10	3.25397e-10	1.21568e-11	2.41094e-10	0	1.1631e-11
Q923M1-4	1.0444e-10	2.35042e-10	9.06185e-11	1.7841e-10	1.2702e-10	2.05716e-10	1.60535e-11	7.21771e-11	8.48335e-11	2.92909e-10	3.29271e-10	1.59202e-10
Q331S7	7.23848e-11	2.25594e-10	1.84431e-10	2.64538e-10	1.53988e-10	6.3571e-11	1.98147e-10	9.13966e-11	1.11595e-10	1.04638e-10	2.9253e-10	6.4177e-11
P62893	2.3216e-06	2.51143e-06	3.13584e-06	2.00017e-06	1.4207e-10	2.70624e-06	2.70425e-06	2.0276e-06	1.45411e-10	2.60709e-06	3.1574e-06	1.93616e-06
Q6P9U8	2.26085e-06	1.73619e-06	2.20254e-06	1.71336e-06	1.51724e-06	1.79062e-06	2.66898e-06	1.3909e-06	2.06252e-06	1.97382e-06	2.30773e-11	1.93601e-06
Q9Z1T4	2.2647e-06	2.32308e-06	1.45423e-06	2.32438e-06	1.53459e-06	2.86016e-06	2.40138e-06	1.01969e-06	9.40025e-07	1.81626e-06	1.8134e-06	1.1611e-06
F1M834	1.25673e-10	1.133e-10	4.77024e-11	1.00551e-10	1.96225e-10	1.55092e-10	2.87865e-10	7.76446e-11	2.2751e-10	1.57306e-10	8.4852e-11	2.07067e-10
D3Z8I7	9.21531e-06	2.24673e-06	3.06782e-06	8.71804e-06	2.50597e-05	9.66352e-07	1.4727e-05	7.02007e-07	2.19324e-06	2.75432e-06	2.33789e-05	2.3853e-06
O88339	5.31279e-06	5.11886e-06	5.52486e-06	3.90065e-06	5.4014e-06	5.56255e-06	3.08267e-06	4.42918e-06	3.81517e-06	8.86526e-06	6.56858e-06	5.61986e-06
G3V6S5	2.29847e-06	3.25888e-06	2.29757e-06	2.77002e-06	1.67948e-06	1.36307e-06	3.20488e-06	2.3594e-06	2.0367e-06	2.83776e-06	1.93806e-06	1.41863e-06
B2RYP4	1.81311e-10	1.78904e-06	3.69929e-06	1.64174e-10	1.86485e-06	1.2211e-06	2.46236e-10	1.53345e-06	6.8747e-11	1.72982e-10	2.69894e-10	3.22354e-06
G3V8Y0	8.71499e-07	7.64271e-07	1.76466e-06	7.07907e-07	7.61495e-07	2.58827e-10	3.03875e-11	9.81855e-07	9.84811e-07	1.02698e-06	5.94687e-07	1.45471e-11
P31662	1.74034e-06	5.82581e-06	3.36555e-06	4.4895e-06	4.43013e-06	4.10721e-06	4.46285e-06	4.19776e-06	4.95737e-06	4.19468e-06	4.19375e-06	2.44963e-06
Q505I9	9.50029e-08	2.38825e-06	1.51759e-06	1.72334e-06	1.44498e-06	1.00321e-06	1.54012e-06	6.90437e-07	5.81873e-11	2.27e-06	2.32225e-06	6.66269e-07
D3ZSY8	1.39617e-06	2.61051e-06	3.02693e-06	7.14437e-07	1.44546e-06	8.46322e-07	1.50702e-06	1.17408e-06	2.06865e-06	1.3256e-06	2.38258e-06	2.31066e-06
P07151	1.54727e-10	3.61658e-11	1.59139e-10	4.58678e-11	4.37601e-11	2.14474e-10	5.21285e-07	3.25247e-10	1.10951e-10	2.04877e-10	1.64309e-10	2.22474e-10
D4A8L9	3.44263e-06	2.10819e-06	3.44584e-06	3.03725e-06	2.82268e-06	1.47861e-06	2.30292e-06	1.60489e-06	3.08999e-06	3.04556e-06	3.02102e-06	2.94225e-06
G3V8Y9	5.49065e-06	1.00132e-05	7.25678e-06	9.0777e-06	5.54122e-06	5.19084e-06	8.69425e-06	4.84345e-06	6.99964e-06	8.56722e-06	7.99605e-06	2.14654e-06
Q62868	1.92576e-06	2.34278e-06	3.03329e-06	2.42484e-06	2.4006e-06	1.98149e-06	2.37736e-06	2.15011e-06	3.53487e-06	2.15866e-06	1.16819e-05	1.78821e-06
Q3KRE0	2.41436e-06	1.07966e-06	4.12813e-06	3.52245e-06	4.98922e-06	2.43543e-06	6.64268e-06	2.6876e-06	1.86144e-06	2.08827e-06	3.13612e-06	3.76611e-06
Q5HZW3	7.57037e-07	9.14806e-07	1.50564e-10	9.49383e-07	5.76117e-07	4.51909e-11	7.37374e-07	6.88726e-06	6.67591e-12	5.83454e-11	9.72031e-07	1.07624e-06
D3ZFD0	2.19507e-06	2.10463e-06	2.19554e-06	2.37218e-06	2.20143e-06	1.60447e-06	2.30461e-06	1.70719e-06	1.48463e-06	2.75202e-06	2.39489e-06	8.2202e-07
B5DFC3	2.14505e-06	3.14829e-06	2.05292e-06	2.11385e-06	2.94273e-06	5.02093e-07	1.97182e-06	2.64295e-06	2.44553e-06	2.02944e-06	3.33319e-06	2.86337e-06
D4A7Q6	6.02646e-07	7.37602e-07	1.01058e-10	1.13914e-10	2.07894e-11	1.35062e-10	8.00007e-07	1.78092e-10	1.45549e-10	3.19475e-10	2.48756e-10	3.52839e-11
Q6P7Q2	2.03044e-06	3.83986e-06	2.97053e-06	2.63351e-06	1.91311e-06	6.41395e-07	3.65319e-06	2.33684e-06	3.75362e-06	2.47376e-06	3.29966e-06	2.8332e-06
Q5U2Y7	1.22536e-10	1.88105e-10	1.82658e-10	9.04741e-11	1.79154e-10	6.22825e-07	4.69178e-11	8.68626e-11	1.6553e-10	8.6772e-11	3.02703e-11	1.84621e-10
F1LQ55	3.35193e-06	2.51481e-06	2.54505e-06	3.60868e-06	4.08943e-06	2.43454e-06	3.48788e-06	2.89848e-06	1.88747e-06	2.68701e-06	3.18101e-06	2.97323e-06
Q6BBI8	1.10933e-06	2.07585e-06	2.11971e-06	1.31649e-06	1.84294e-06	7.66096e-07	2.17115e-06	1.71603e-06	8.19288e-07	2.0163e-06	1.7035e-06	8.06394e-07
Q9JKE3	3.43588e-05	2.40169e-05	4.04834e-05	3.61268e-05	2.00493e-05	1.79188e-05	2.31314e-05	2.39954e-05	2.23063e-05	1.94711e-05	2.07396e-10	2.04313e-05
G3V846	6.35476e-05	7.23618e-05	6.94431e-05	8.33011e-05	6.2809e-05	4.6542e-05	6.68406e-05	7.07449e-05	6.31582e-05	8.19687e-05	7.3784e-05	4.77928e-05
F1M2K3	1.53988e-05	1.75463e-05	8.24464e-11	1.64947e-05	7.17818e-11	5.92578e-06	1.57332e-05	2.64105e-10	1.42601e-05	1.78255e-05	1.022e-10	1.37263e-05
P54319	1.60649e-06	8.39048e-06	1.78484e-06	1.81316e-06	1.66436e-06	7.78639e-07	4.19114e-06	8.13041e-07	1.43704e-06	5.25601e-06	1.92686e-06	1.48872e-06
Q9JK11-3	8.94314e-06	9.84365e-06	8.01806e-06	8.14645e-06	7.61376e-06	6.21047e-06	1.02527e-05	5.95207e-06	6.73875e-06	1.06357e-05	6.63238e-06	6.15021e-06
P04218	6.62447e-06	6.44956e-06	1.17951e-05	5.0096e-06	7.09142e-06	3.42605e-06	7.11829e-06	5.54824e-06	5.12661e-06	7.46344e-06	7.01545e-06	5.00585e-06
O55012	2.12852e-05	2.01759e-05	2.4727e-05	1.74321e-05	2.2168e-05	9.73637e-06	1.90611e-05	1.80061e-05	1.79426e-05	1.27923e-05	1.56366e-05	1.00692e-05
A0A5D0	4.64221e-06	6.44956e-06	1.02624e-05	6.01917e-06	7.60334e-06	3.42605e-06	7.11829e-06	7.08565e-06	7.81682e-06	7.46344e-06	7.44282e-06	4.71561e-06
F1LRB8	8.86676e-07	2.12249e-10	2.58544e-06	6.59896e-06	2.38346e-11	5.80465e-11	1.57403e-06	1.54972e-10	5.48292e-07	7.6347e-11	4.64544e-11	1.64675e-06
M0RDK9	1.93578e-06	2.42098e-06	2.62617e-06	2.17631e-06	2.0382e-06	5.6179e-07	1.8685e-06	2.18971e-06	2.29255e-06	1.71472e-06	1.12425e-10	1.76469e-06
G3V746	2.59141e-06	2.71522e-06	4.95535e-06	3.29926e-06	3.45726e-06	3.81398e-06	3.17078e-06	2.78914e-06	3.45955e-06	2.69906e-06	6.1616e-06	2.91307e-06
G3V9A3	0.000235259	0.000305821	0.000325451	0.000267562	0.000316325	0.000178967	0.000306035	0.000184841	0.00029453	0.000343504	0.000251576	0.000195633
Q80Z29	1.11411e-10	8.62802e-12	1.78594e-06	2.05167e-10	4.89877e-07	9.10873e-07	7.38085e-11	5.9401e-07	3.3555e-06	3.36934e-10	1.36736e-10	1.53065e-06
Q9EPJ0	2.12653e-10	2.02888e-10	1.47622e-10	2.01491e-10	1.12235e-06	3.00462e-06	5.47633e-07	3.07711e-10	1.27422e-06	2.36792e-10	2.11172e-07	1.79079e-06
P97852	2.09304e-06	1.82393e-06	1.43105e-06	1.70605e-06	1.4636e-06	1.28157e-06	2.36226e-06	1.3952e-06	1.4373e-06	1.95961e-06	1.78593e-06	1.28049e-06
Q0ZFS8	8.54109e-06	7.48052e-06	4.75914e-06	8.30304e-06	1.2182e-05	1.98243e-06	9.52999e-06	1.87325e-06	5.61928e-06	9.54786e-06	2.10341e-10	4.70207e-06
Q2IBD4-2	2.10012e-06	2.65104e-06	2.61318e-06	1.54238e-06	1.56978e-06	4.61735e-07	2.43654e-06	2.43638e-06	1.70152e-06	2.34606e-06	3.16605e-06	1.29864e-06
F1M8I7	1.87294e-06	1.29545e-06	1.16797e-06	2.4362e-06	1.30882e-06	7.89359e-07	1.31854e-06	5.21459e-07	7.98407e-07	1.90155e-06	1.10417e-06	6.35605e-07
E9PSV8	4.64632e-05	4.14041e-05	4.73903e-06	4.59669e-05	3.60577e-05	4.59203e-06	2.62135e-05	2.95441e-05	5.0358e-06	3.09041e-05	4.32505e-05	4.84458e-06
D4A781	1.78279e-06	2.62643e-06	2.27576e-06	1.91703e-06	1.73869e-06	2.23705e-06	2.34157e-06	1.56679e-06	2.43496e-06	2.06229e-06	2.13025e-06	1.29263e-06
D3ZCL3	2.7502e-10	5.06465e-11	1.30334e-06	1.09802e-11	1.29172e-10	1.60459e-10	2.84108e-10	1.9714e-06	1.04356e-10	2.11931e-10	2.42938e-11	1.19833e-06
Q68FT7	1.15172e-06	1.33749e-10	1.6426e-06	7.02652e-07	1.30794e-06	5.34467e-07	9.79503e-07	1.22323e-06	7.6499e-07	1.24133e-06	1.24302e-06	7.46354e-07
P0C5W1	2.36619e-06	1.33775e-06	1.78554e-06	1.97364e-06	2.26275e-06	2.35037e-06	1.71792e-06	2.07305e-06	2.56033e-06	1.69512e-06	2.65427e-06	1.49059e-06
Q64232	1.8906e-06	2.47464e-06	1.26326e-06	1.81108e-06	1.47334e-06	6.32176e-11	1.76679e-06	2.05528e-06	5.51883e-11	1.65997e-06	2.45641e-06	1.019e-06
Q1M168	4.59816e-06	5.24834e-06	3.43716e-06	4.31505e-06	2.39344e-06	4.64357e-07	4.89229e-06	1.91977e-06	2.82014e-06	5.36566e-06	5.52984e-06	1.43475e-06
G3V699	6.46798e-07	1.57977e-06	2.69722e-06	3.60532e-07	1.88065e-06	9.52002e-07	1.61245e-06	1.83181e-06	2.36231e-06	1.64156e-06	1.78694e-06	3.1281e-06
Q5I0H3	1.71671e-10	5.75017e-07	8.10055e-11	2.3289e-10	8.468e-11	1.38649e-10	7.28335e-07	8.7196e-11	1.73712e-10	7.56715e-07	3.45332e-10	9.92598e-11
Q64605-2	2.70462e-06	2.6997e-06	5.01146e-06	2.91714e-06	2.38717e-06	2.33257e-06	2.65171e-06	2.27782e-06	2.60285e-06	2.65383e-06	2.53688e-06	3.85154e-06
B4F7A5	1.36691e-10	1.62494e-11	6.41978e-11	2.99551e-10	7.19825e-07	1.45206e-06	1.48715e-10	2.20582e-10	2.19792e-06	2.16019e-10	8.29832e-11	2.3301e-06
Q3KRD8	6.38218e-07	1.21375e-06	1.29292e-10	1.00229e-06	2.32782e-12	8.51323e-11	1.26213e-06	1.0542e-06	2.42103e-06	1.41047e-06	1.14479e-06	1.0846e-06
F1LW77	8.22063e-06	5.58799e-05	7.29035e-05	6.24275e-05	9.13308e-06	2.44435e-06	4.33094e-05	5.87353e-05	4.02678e-05	4.23033e-05	4.90337e-05	2.84545e-05
F7EYB9	1.17396e-05	1.62641e-05	1.71175e-05	1.29675e-05	1.50294e-05	6.58292e-06	1.38895e-05	5.71142e-06	1.41091e-05	1.24661e-05	1.33924e-05	3.90611e-06
G3V6Z5	5.31094e-06	7.10164e-06	4.32497e-06	6.31565e-06	5.47999e-06	2.66677e-06	5.02827e-06	2.17232e-06	4.33985e-06	5.42663e-06	5.20985e-06	1.94471e-06
Q6AYG5	1.55457e-06	1.72194e-06	1.16821e-06	1.46036e-06	9.65926e-07	3.83378e-07	9.57657e-07	5.90349e-07	6.69036e-07	1.36801e-06	1.31811e-06	3.23678e-11
D3ZEG8	8.38137e-07	8.29267e-07	7.95921e-07	2.58371e-10	6.38846e-07	7.77226e-11	9.12676e-07	8.85865e-07	1.53787e-10	2.96765e-10	3.84152e-11	6.47466e-07
P26817	9.30012e-07	1.24256e-06	2.05623e-06	2.11289e-06	7.89007e-07	4.3873e-07	1.15415e-06	5.55503e-07	5.70729e-07	1.50376e-06	5.66399e-07	1.09757e-06
Q4QR85	1.05286e-06	1.47244e-06	1.40024e-06	1.09405e-06	1.21717e-06	9.57108e-07	2.241e-06	8.42336e-07	1.39741e-06	1.37824e-06	1.81194e-06	5.00926e-07
D3ZZM9	9.47235e-07	4.88064e-07	3.28745e-06	8.89662e-07	6.60987e-07	3.27932e-06	7.26498e-07	4.39006e-07	1.40275e-10	7.80876e-07	4.5067e-07	1.7709e-10
D4A8T3	7.11319e-07	1.50316e-06	5.66e-11	7.64834e-07	1.98165e-06	3.86999e-07	1.53915e-06	1.90078e-10	1.52018e-10	2.05943e-10	8.79917e-07	3.65241e-11
Q9JHW5	2.59773e-10	1.60438e-10	1.91475e-10	2.07721e-10	2.7785e-06	2.09604e-10	2.56138e-06	4.26895e-11	1.87421e-06	2.81379e-10	1.51042e-06	3.71945e-11
F1LX20	1.73869e-10	1.24948e-10	1.36638e-10	3.37351e-11	2.03048e-10	1.45797e-10	2.96072e-11	3.6472e-11	3.09781e-11	7.30528e-12	7.77634e-07	4.60881e-11
G3V648	1.29074e-06	2.10239e-06	1.41205e-06	1.7968e-06	1.75419e-06	8.20388e-07	1.42084e-06	1.65581e-06	1.12988e-06	1.79891e-06	1.52073e-06	4.65266e-07
P19492-2	5.72264e-06	7.10164e-06	4.32497e-06	6.31565e-06	5.67942e-06	2.82421e-06	5.02827e-06	2.17232e-06	4.2189e-06	5.76066e-06	5.20985e-06	1.94471e-06
E9PTW1	3.61544e-06	3.72884e-06	1.90417e-06	3.82391e-06	2.71221e-06	4.18527e-07	4.10331e-06	2.46674e-06	2.76299e-06	4.18797e-06	2.75284e-06	2.19493e-06
G3V6T1	1.79217e-06	2.07304e-06	1.70508e-06	1.80437e-06	2.03368e-06	9.34674e-07	1.89537e-06	1.15952e-06	1.22887e-06	1.66187e-06	1.01828e-06	1.29689e-06
D4A197	2.04868e-06	1.90118e-10	1.63704e-10	1.78048e-06	1.98574e-06	1.27533e-06	1.4559e-06	1.29129e-06	1.73892e-06	1.35932e-10	1.76669e-06	1.78544e-06
Q7TP40	2.15351e-10	2.6941e-10	3.27488e-11	8.34655e-11	1.96176e-06	3.24357e-07	2.13753e-10	2.5037e-11	1.98577e-10	2.18151e-10	9.12516e-11	6.69479e-11
F8WFI0	2.35414e-06	3.36327e-06	2.52063e-06	1.49813e-06	2.70605e-06	9.5939e-07	1.7516e-06	2.02893e-06	4.53066e-11	2.56545e-06	3.51428e-07	1.47266e-06
Q5HZA4	1.98967e-10	1.32498e-10	1.59794e-10	1.18914e-10	2.69193e-10	7.84034e-11	2.82764e-10	2.23849e-10	2.21615e-10	2.98315e-10	2.00468e-10	5.47806e-11
D3ZC63	8.21403e-07	3.35085e-06	1.14493e-06	8.40642e-07	2.09887e-06	2.63763e-07	1.9893e-06	1.37515e-06	9.46311e-07	2.56977e-06	6.65448e-07	5.79352e-07
Q505J6	2.35055e-05	2.80558e-05	2.72478e-05	2.40588e-05	3.24724e-05	2.02829e-05	2.7419e-05	2.95968e-05	2.5714e-05	2.73166e-05	3.1748e-05	1.52292e-05
Q99MZ4	1.37189e-06	1.03159e-06	2.05713e-06	1.58174e-06	1.77328e-06	2.45563e-07	8.00968e-07	1.0942e-06	1.48381e-06	1.13173e-06	9.27829e-07	2.61651e-07
B0BN86	3.27617e-06	4.56469e-06	4.29693e-06	6.97871e-06	4.33625e-06	2.58049e-06	4.66102e-06	6.81096e-06	6.9115e-06	4.40642e-06	3.77575e-06	9.41745e-07
Q9WU49	2.4301e-10	2.21194e-10	3.3681e-06	2.90377e-10	2.34861e-10	2.73869e-06	8.86483e-11	3.7549e-06	4.67823e-06	1.69843e-10	2.10167e-06	1.11797e-06
Q6AY72	6.14805e-07	4.34708e-11	7.91715e-11	9.2935e-11	2.03604e-10	2.45356e-10	7.36785e-11	1.02231e-10	8.77061e-11	3.43174e-10	7.42741e-11	3.26136e-11
Q5PQK2	4.31157e-06	7.00245e-06	5.59786e-06	6.01461e-06	5.00405e-06	3.20503e-06	7.54186e-06	3.11554e-06	3.50531e-06	6.62503e-06	2.58206e-06	3.51385e-06
B5DF51	1.67079e-10	1.73481e-10	9.39639e-11	1.98127e-10	1.96064e-10	2.14308e-06	2.4836e-10	4.86737e-11	1.92602e-10	1.31573e-11	1.74552e-10	4.20435e-11
F1LN70	1.36654e-06	4.65513e-07	1.32215e-06	1.73005e-10	2.9322e-07	8.43424e-07	1.35522e-06	1.37488e-06	1.96718e-06	1.44874e-06	1.29974e-06	5.57834e-07
D3ZE32	1.63072e-06	1.37466e-06	3.69988e-07	1.6707e-06	1.66214e-06	1.28806e-06	1.61147e-06	1.74697e-06	1.42572e-06	2.11917e-06	1.44264e-10	9.93695e-07
B4F7A1	1.05485e-10	2.8077e-10	1.64137e-10	2.78649e-10	2.02799e-10	1.43886e-10	2.04996e-10	2.82908e-10	1.89603e-10	3.16743e-10	2.74143e-10	4.93886e-07
Q63468	6.70266e-07	1.22783e-06	2.52224e-06	1.15917e-06	1.05103e-10	1.26789e-10	6.5211e-11	2.64274e-06	1.13134e-10	3.85998e-11	2.57099e-06	5.99872e-11
B2GV15	8.70002e-07	5.77434e-07	1.38173e-06	5.88403e-07	7.87676e-07	8.58351e-07	1.17836e-10	1.19331e-06	5.09891e-07	1.04057e-10	1.84494e-06	1.12282e-06
P35286	1.24777e-05	2.09875e-05	1.89556e-05	2.06126e-05	2.80424e-05	7.8243e-06	3.34189e-05	2.07933e-05	1.9782e-05	3.13857e-05	1.13123e-05	5.35098e-06
P49806	1.09456e-10	1.28184e-10	1.95667e-10	7.21893e-11	1.50942e-11	2.26112e-10	7.71175e-11	1.26252e-10	1.3538e-10	2.21077e-10	2.60444e-10	2.66304e-07
Q66H09	2.814e-10	2.02514e-10	9.34299e-11	1.49144e-10	1.15073e-10	2.18322e-10	4.5863e-11	1.25552e-10	8.4282e-11	1.98463e-10	5.25367e-11	1.28443e-10
P13234	3.39157e-06	3.0413e-06	2.5624e-06	3.16447e-06	2.37149e-06	2.1385e-06	2.80375e-06	2.68745e-06	2.37504e-06	2.35333e-06	2.97945e-06	1.56292e-06
D3ZXF9	2.59366e-06	1.14594e-10	4.10079e-06	4.55252e-11	1.04503e-10	8.34435e-11	1.40927e-10	1.67627e-06	6.38176e-11	3.14632e-06	2.65542e-06	6.8635e-11
D4AB03	1.05437e-06	2.09248e-06	1.83605e-10	9.51951e-07	1.52616e-06	1.25588e-06	1.20981e-06	8.87202e-07	1.20335e-06	1.09878e-06	1.38826e-06	1.74498e-10
Q6PDU1	3.70238e-06	4.23451e-06	2.05554e-06	2.70823e-06	4.01833e-06	1.5846e-06	3.67233e-06	1.61723e-10	1.49133e-06	3.72834e-06	5.01606e-06	2.30876e-06
D3ZPJ0	1.39206e-06	2.04048e-06	3.6091e-07	2.24363e-06	1.66443e-06	1.02149e-06	1.63796e-06	2.59871e-10	7.48948e-07	1.51865e-06	1.64309e-06	4.65413e-07
B2RYU0	2.47557e-10	2.48734e-06	2.44897e-06	2.06179e-10	2.02557e-06	1.35223e-06	1.75097e-06	3.25064e-10	1.68226e-06	1.73667e-06	2.01261e-10	6.14847e-07
D3ZBN0	5.4031e-11	3.59957e-06	9.05771e-07	1.03261e-10	3.16158e-06	2.30006e-06	8.4694e-06	1.61136e-06	5.08564e-11	2.33362e-10	1.39532e-06	2.39329e-06
contaminant_P04264	7.90164e-07	5.56333e-06	3.049e-06	2.42921e-06	1.98461e-06	1.4569e-06	5.63176e-07	3.43651e-06	1.90544e-06	4.75236e-07	2.73496e-06	9.68911e-11
P35439-4	3.17647e-06	5.14764e-06	3.71295e-06	4.52573e-06	4.22558e-06	2.72046e-06	3.27561e-06	3.73878e-06	2.4842e-06	2.07801e-06	4.42257e-06	1.53692e-06
P0C5X8	1.11527e-05	1.0131e-05	1.26408e-05	1.09505e-05	9.36819e-06	9.9428e-06	8.762e-06	1.33788e-05	1.16641e-05	1.14312e-05	1.06651e-05	5.34746e-06
B1WC33	1.36897e-06	1.94722e-06	7.73211e-07	1.55046e-06	2.11215e-06	2.18872e-10	1.46618e-06	1.33505e-06	3.13917e-11	2.01194e-06	1.84959e-06	2.23011e-10
Q6KC51-2	1.09409e-06	1.99996e-06	1.19807e-06	1.35154e-06	1.6262e-06	1.74492e-06	1.90988e-06	1.3637e-06	1.78797e-06	2.43669e-06	9.57956e-07	1.57859e-06
G3V8T4	3.27514e-06	9.52139e-06	2.64572e-06	2.63428e-06	2.71974e-06	1.14467e-06	3.04537e-06	1.81362e-06	2.59643e-06	2.47761e-06	1.08256e-05	9.78796e-07
Q6JAM9	4.60286e-11	2.14564e-10	3.82839e-06	1.30455e-10	3.15813e-06	1.50366e-06	1.15698e-10	4.04997e-07	5.02672e-06	1.2283e-06	6.02888e-07	1.00044e-06
P62193	2.89208e-06	1.45877e-06	5.66016e-07	1.78139e-06	1.65582e-06	5.8579e-07	1.95208e-06	1.21529e-06	8.96801e-07	1.30085e-06	1.35517e-06	4.31384e-07
M0RC57	2.52331e-06	4.59189e-06	6.04117e-06	2.62376e-06	4.52166e-06	4.18898e-06	3.28947e-06	4.37175e-06	4.23835e-06	3.38618e-06	4.04906e-06	4.77967e-06
B2GV65	3.18565e-07	1.74617e-10	1.05905e-11	2.55598e-10	2.59003e-10	1.99602e-10	8.26388e-07	5.95753e-11	8.37879e-11	3.06066e-10	2.98525e-10	6.5987e-11
B5DF55	1.64719e-06	4.67268e-07	1.89601e-06	2.27774e-06	2.64166e-06	4.52868e-07	1.6547e-06	1.9956e-06	3.49364e-06	2.60829e-06	2.89572e-06	2.42486e-06
O35867	3.31042e-06	2.41409e-06	1.99921e-06	2.40526e-06	1.97419e-06	2.14061e-06	2.42887e-06	1.30373e-06	5.08815e-07	2.55841e-06	1.90671e-06	3.64787e-07
D4A9D6	1.70003e-06	2.68998e-06	2.39558e-06	1.94268e-06	2.23283e-06	2.34736e-06	2.07976e-06	3.73339e-06	3.28003e-06	2.15058e-06	3.24189e-06	1.73249e-06
G3V803	2.46834e-06	3.52813e-06	1.79326e-06	2.79043e-06	2.40236e-06	2.40419e-06	2.31931e-06	2.17033e-06	2.61514e-06	2.71064e-06	2.519e-06	2.59571e-06
G3V640	1.20185e-06	1.37441e-06	6.86866e-06	1.93844e-06	5.35187e-07	4.4709e-07	2.63965e-10	3.67553e-11	1.81421e-06	2.77853e-10	7.06248e-11	1.20333e-06
Q794E4	9.40274e-06	6.23765e-06	2.99062e-06	8.10139e-06	8.47699e-06	8.06062e-06	6.63244e-06	6.51985e-06	2.2634e-06	7.47456e-06	2.20138e-06	2.8184e-06
O08773	1.95156e-06	1.42788e-06	1.25111e-06	1.24333e-06	1.04695e-06	1.1167e-06	1.08539e-06	2.81658e-10	3.86536e-11	1.00223e-06	2.95463e-05	2.09894e-10
D3ZA96	3.24209e-05	4.06255e-05	6.04242e-05	5.64594e-05	3.35898e-05	3.32727e-05	6.89378e-05	3.39191e-05	2.55439e-05	7.08272e-05	6.71593e-05	3.03733e-05
Q04462	2.48164e-06	2.01188e-06	2.00849e-06	2.78615e-06	3.55071e-06	1.95151e-06	1.49966e-06	1.13829e-06	3.84881e-06	2.6249e-06	1.78694e-06	1.003e-06
Q5XIP0	1.49817e-06	2.33359e-10	1.61716e-06	2.03461e-06	2.40831e-06	1.36162e-06	2.07685e-06	8.95589e-07	2.14095e-06	3.21884e-06	1.13278e-06	1.69381e-11
D3ZSF3	0.000230387	0.000244811	2.55743e-11	0.000221939	6.91972e-05	2.00689e-10	1.78048e-10	0.000181265	1.83858e-10	7.53634e-05	0.000220813	2.19547e-11
A1L1L6	2.65717e-06	3.11317e-06	3.06003e-06	1.93912e-06	3.0235e-06	1.89171e-06	2.26269e-06	2.16406e-06	2.86177e-06	2.8365e-06	2.28247e-06	1.72435e-06
G3V6U4	1.58077e-11	7.86901e-07	4.93513e-07	1.94339e-06	8.2156e-07	1.0005e-06	2.33477e-06	5.19668e-07	1.10639e-06	8.26256e-07	1.24506e-06	7.05719e-07
Q02589	9.96655e-11	4.46315e-07	1.49838e-11	1.61649e-06	1.13331e-10	1.34145e-06	2.11109e-10	1.02065e-10	1.89544e-06	1.59592e-10	3.26838e-10	1.93353e-06
Q5I0P2	3.4797e-06	2.38565e-10	5.30771e-06	1.5553e-10	6.85902e-11	2.7816e-07	2.34702e-06	9.15966e-11	4.35486e-12	3.56777e-10	4.2146e-06	4.27589e-06
Q498E0	6.58981e-11	2.61702e-10	1.80703e-10	8.76239e-11	5.37888e-11	6.71057e-11	4.66288e-11	2.08447e-10	1.02035e-11	7.18514e-11	1.81904e-10	2.19469e-10
F7F983	4.15128e-07	1.52035e-06	2.12616e-06	3.68349e-07	4.53507e-07	2.57308e-10	5.14667e-07	1.28807e-06	1.54603e-10	2.22259e-11	1.25181e-06	2.17692e-10
P97829-2	8.32544e-06	8.79939e-06	9.71253e-06	8.64474e-06	8.60472e-06	4.55082e-06	9.37457e-06	8.16316e-06	7.5212e-06	8.77074e-06	9.27876e-06	4.4266e-06
Q9EPH2	1.76809e-10	2.01004e-10	6.63945e-11	1.48117e-11	1.52846e-10	1.22454e-06	5.24809e-11	2.97093e-10	3.53436e-06	1.91719e-06	2.96356e-11	2.49547e-06
B5DF95	2.08501e-06	1.07252e-06	1.62547e-06	1.68352e-06	2.63878e-10	1.48658e-06	1.62532e-06	1.86814e-06	1.45566e-06	3.22828e-10	1.95594e-06	7.27798e-07
D3ZES7	3.24294e-06	3.20928e-06	3.31395e-06	3.13911e-06	2.73218e-06	1.57993e-06	3.32914e-06	3.4751e-06	2.42384e-06	3.22994e-06	2.90416e-06	7.74379e-07
G3V721	4.45692e-06	1.77701e-06	9.32102e-07	4.46349e-06	2.37272e-06	2.89141e-06	1.42758e-06	1.24671e-06	6.23831e-07	1.64131e-06	2.61992e-06	6.86982e-07
P50411	2.69867e-10	1.50228e-10	1.29166e-06	5.50414e-11	1.11399e-10	6.85872e-06	6.74074e-11	2.89409e-10	5.71647e-11	2.83433e-10	3.32814e-10	1.15773e-05
Q80U96	1.72077e-06	2.16199e-06	2.81519e-06	2.55017e-06	2.11702e-06	1.27406e-06	2.0119e-06	2.51181e-06	3.15784e-06	2.49806e-06	2.45671e-06	2.56086e-06
F6T071	1.37965e-10	2.73695e-10	1.07517e-10	1.15425e-10	2.10177e-10	4.17119e-07	2.10442e-06	6.83432e-13	6.28869e-11	2.7745e-06	3.44346e-06	6.33299e-06
Q9ERQ6-2	2.21359e-06	3.29536e-06	3.23199e-06	3.87331e-06	3.07637e-06	2.49919e-06	2.09893e-06	1.34693e-06	6.46312e-06	2.57334e-06	2.61692e-06	1.40622e-10
D3ZQ33	1.80133e-06	2.20865e-06	2.58317e-06	9.77733e-07	1.0304e-06	1.01877e-06	1.05331e-06	6.72523e-07	2.23676e-06	2.95104e-06	1.42622e-06	9.80473e-07
Q505J9	1.00003e-06	5.89917e-07	1.21523e-11	2.60504e-10	8.66145e-07	5.72558e-06	1.12012e-06	1.92577e-06	6.28524e-12	2.5927e-06	1.06854e-10	3.00481e-06
Q5BK81-2	4.88774e-07	2.01602e-06	2.35333e-06	8.02103e-12	1.857e-06	2.54036e-06	3.45799e-06	5.61131e-07	1.39389e-06	3.90006e-06	3.34613e-11	1.3395e-06
F1M383	7.72932e-05	8.64261e-05	4.33507e-05	5.66696e-05	8.16368e-05	8.72281e-05	2.70549e-05	5.33232e-05	7.57863e-05	9.63788e-05	1.50426e-05	6.85347e-05
D3ZPN3	2.96299e-11	1.47487e-06	2.01675e-06	2.99566e-10	1.13038e-10	1.30616e-06	7.25148e-07	5.42322e-07	1.28655e-06	7.97574e-11	2.36062e-10	7.89922e-11
M0R686	2.95799e-06	3.03684e-06	1.97601e-10	3.25371e-06	1.75574e-06	1.1583e-05	4.21158e-06	1.79876e-10	2.87854e-06	3.61833e-06	3.58438e-06	2.25427e-06
D3ZZR8	2.88054e-10	1.33245e-10	1.11205e-10	4.24881e-11	5.65997e-11	2.29214e-10	7.23058e-11	1.74642e-10	7.25388e-11	2.68396e-10	2.55502e-06	4.7373e-12
Q62609-3	1.3595e-06	5.26487e-06	1.98472e-06	8.59928e-07	1.61995e-06	1.01444e-10	2.482e-06	5.90866e-07	1.42903e-06	1.7433e-06	1.85993e-06	1.90609e-11
D3ZXS6	0.000110096	0.000136284	0.000121654	7.87086e-05	0.000132507	3.94651e-05	0.00014332	0.000107262	0.000118005	0.000137882	0.000119963	8.97579e-05
D4A3Z3	1.26103e-06	1.76797e-06	1.36677e-06	1.02405e-06	6.40233e-07	7.16405e-07	1.03214e-06	2.85545e-06	1.61173e-06	2.02746e-10	5.45103e-07	5.2849e-07
P14046	1.38343e-10	1.06448e-06	1.60923e-10	1.39473e-10	1.87587e-10	1.55733e-10	4.37009e-06	8.77223e-06	6.25848e-06	3.48395e-06	3.0607e-10	9.89647e-07
B0BN85	1.44542e-10	4.23492e-11	1.30895e-06	1.98408e-10	2.18683e-10	7.6368e-07	2.15314e-06	1.47988e-10	1.67801e-06	3.29416e-11	6.79627e-11	7.51883e-07
P30713	1.38241e-06	1.8481e-06	2.45643e-06	1.71496e-06	1.59084e-06	1.26762e-06	1.94157e-06	7.02007e-07	1.18475e-06	1.46228e-06	1.32581e-06	3.02611e-07
D3ZQT0	2.15002e-05	0.000117055	9.8173e-05	0.000137431	9.96081e-05	1.31629e-05	0.000110086	8.61283e-05	0.000120564	0.000107765	0.000125157	2.37563e-05
P68101	2.26412e-06	1.58474e-06	1.90142e-06	2.0759e-06	8.39919e-11	3.1071e-06	2.36488e-06	2.5432e-10	3.56019e-06	2.44161e-06	1.89536e-06	2.34298e-06
M0RDA8	2.14138e-10	4.4348e-11	1.00233e-06	1.31342e-10	4.69347e-07	2.45421e-10	4.44469e-11	3.79497e-07	1.55614e-10	2.24332e-10	9.11458e-11	1.00913e-10
F1LN69	1.34744e-06	3.24034e-06	2.98553e-06	2.01723e-06	2.90966e-06	2.88686e-06	2.03174e-06	1.78744e-06	1.37942e-06	1.52531e-06	3.80276e-06	1.85231e-06
B5DEP7	1.99513e-06	1.94927e-06	4.74606e-12	1.91885e-06	3.02617e-11	1.20887e-06	2.16682e-06	1.03515e-11	9.24746e-11	1.83592e-06	6.29735e-11	1.88911e-10
G3V881	2.16926e-06	3.66103e-06	1.18528e-06	2.91122e-06	7.05425e-06	2.09694e-06	2.78219e-06	1.05506e-06	5.36985e-06	2.87011e-06	3.04771e-06	1.36019e-06
D3ZT71	8.98161e-07	1.07826e-06	8.15398e-07	9.13495e-07	1.19818e-06	1.25083e-06	1.22054e-06	1.20473e-06	9.4493e-07	1.31889e-06	1.4004e-06	7.13829e-07
Q3SWU3	9.07629e-06	3.96404e-06	6.25091e-06	2.93392e-06	3.76004e-06	5.66586e-06	7.16316e-06	2.71407e-06	8.14163e-06	6.70514e-06	7.56716e-06	3.97106e-06
F1M110	2.04408e-10	6.64644e-07	1.01265e-06	7.15787e-07	2.21568e-10	7.8129e-07	5.70593e-07	2.72706e-10	9.99785e-07	1.09298e-06	3.04624e-10	9.8542e-07
D4A1V5	2.46914e-06	2.48858e-06	2.50363e-05	2.24484e-06	2.69454e-06	1.56849e-06	2.61749e-06	1.9621e-06	1.54372e-06	2.71144e-06	2.73238e-06	2.14441e-06
F1M8F2	3.60264e-06	1.79166e-06	5.58119e-06	2.77e-06	4.70266e-06	3.27642e-06	3.27305e-06	3.86373e-06	5.53179e-06	2.42509e-06	4.33478e-06	4.64056e-06
M0R8C1	6.11093e-07	1.10122e-10	8.13179e-12	1.69797e-10	5.66144e-11	6.2791e-07	2.07409e-10	4.00891e-11	4.35879e-07	1.5531e-10	1.74922e-10	5.16093e-07
F1LW99	4.55038e-05	4.92444e-05	4.73688e-05	4.98018e-05	5.07987e-05	2.62675e-06	5.35094e-05	4.36242e-05	3.81539e-05	5.17724e-05	5.02389e-05	2.35154e-05
P80299	1.01348e-10	4.47794e-11	3.33232e-11	1.20907e-10	3.7441e-07	2.06017e-10	3.22403e-07	8.04117e-11	5.97321e-07	1.66355e-10	4.83549e-07	5.89889e-07
P62864	7.64452e-06	1.21318e-05	1.02011e-05	1.08234e-05	1.19626e-05	6.12655e-06	1.27137e-05	1.0045e-05	8.2561e-06	1.15029e-05	1.24957e-05	5.08181e-06
P22057	6.112e-06	6.59111e-07	9.48149e-07	6.47322e-06	6.2316e-06	3.46442e-07	6.93917e-06	1.646e-06	5.46049e-06	6.50858e-06	6.32315e-06	8.14921e-07
Q5XIM7	1.7486e-06	1.38444e-06	1.52571e-06	1.23634e-06	2.12988e-10	1.43713e-06	1.10822e-06	7.42082e-07	3.24259e-11	1.33702e-06	2.57359e-10	2.74071e-11
F1LXU4	2.83577e-06	3.13807e-06	3.08155e-06	2.92923e-06	2.31893e-06	8.70898e-07	4.81788e-06	1.20084e-06	2.36157e-06	2.43372e-06	3.97401e-06	1.85917e-06
Q52KJ9	2.37713e-06	3.81907e-06	2.45542e-06	5.34216e-12	1.61074e-10	1.59104e-06	1.39901e-10	2.75033e-06	2.20793e-06	3.55159e-06	3.81519e-06	2.79828e-06
Q32PX2	3.24616e-07	4.48937e-07	5.67916e-07	4.15901e-07	5.56628e-11	7.16618e-07	5.41395e-07	4.42529e-07	5.44221e-07	5.45243e-07	3.02174e-10	3.98025e-07
Q5XIC0	1.40648e-06	1.10601e-06	1.41841e-06	1.66338e-06	1.03263e-06	8.12592e-07	1.61038e-06	1.0999e-06	1.0515e-06	1.55461e-06	1.74451e-06	6.55458e-07
Q5U302	3.72663e-06	4.84684e-06	3.16594e-06	3.30078e-06	3.67652e-06	1.42436e-06	3.73108e-06	2.98889e-06	3.05537e-06	3.50687e-06	3.80114e-06	1.35395e-06
Q5M827	1.21448e-06	2.62191e-10	3.55199e-11	1.87739e-10	4.16958e-11	6.53645e-11	5.31601e-11	7.01602e-11	1.21913e-11	3.1901e-10	7.44857e-11	9.77626e-12
Q6AYR1	2.37508e-07	9.96882e-07	1.26531e-10	4.77835e-11	1.34788e-06	1.91996e-10	4.49093e-11	2.50803e-10	1.08343e-10	1.21484e-06	9.86707e-07	1.39147e-10
D3ZBM3	3.70203e-06	7.62573e-11	1.22612e-10	6.63645e-07	7.88238e-11	1.08486e-07	5.28566e-11	1.03348e-11	5.14959e-06	1.21605e-06	6.95141e-11	4.16636e-11
M0R919	7.19604e-11	6.71979e-11	1.28815e-06	1.99249e-10	8.94528e-11	8.67144e-07	6.14108e-11	1.19626e-06	1.11196e-06	1.61879e-10	4.06895e-11	9.96062e-11
G3V6I1	1.63749e-06	2.01261e-06	1.60168e-06	1.70349e-06	2.1452e-06	1.4583e-06	1.55333e-06	1.32264e-06	1.19026e-06	1.52686e-06	1.42567e-06	6.35244e-07
Q4KLG9	2.86474e-07	2.17527e-10	2.00725e-10	1.4739e-07	6.43373e-07	3.71891e-07	4.17597e-07	3.43308e-07	5.26589e-07	3.46358e-07	4.24623e-07	5.67064e-07
F1M7V4	2.52926e-06	2.93846e-06	2.78244e-06	2.39619e-06	2.21879e-06	4.92729e-06	2.20574e-06	1.57315e-06	2.47369e-06	2.30241e-06	4.09059e-06	2.78295e-06
Q63151-2	1.57899e-06	9.33733e-07	2.37086e-07	1.61883e-06	1.24227e-06	4.3573e-07	7.85539e-07	8.94478e-07	4.93152e-07	1.19471e-06	2.00757e-06	4.28706e-07
Q8CF97	1.18308e-06	1.60679e-06	2.4301e-06	1.46484e-06	6.65595e-07	5.63615e-07	1.62346e-06	5.60459e-07	1.72413e-10	1.53532e-06	9.77242e-07	6.12943e-07
D3ZD73	1.87801e-06	2.44748e-06	2.16824e-06	1.61008e-06	2.22154e-06	1.22583e-06	2.02821e-06	1.96114e-06	1.98861e-06	2.29782e-06	1.92186e-06	9.33621e-07
P13676	4.26216e-07	2.08856e-06	2.05806e-06	2.48198e-06	1.70365e-06	1.32967e-06	1.76946e-06	1.11159e-06	1.07708e-06	1.73596e-06	1.32646e-06	2.75216e-07
F1LUA1	1.63374e-06	1.6967e-06	1.68292e-06	1.23959e-06	1.69042e-06	1.14659e-06	1.73711e-06	8.9414e-07	1.54171e-06	1.61018e-06	1.16837e-06	1.11213e-06
B2GUZ3	3.86127e-06	2.03639e-06	2.10667e-06	2.045e-06	2.17848e-06	1.19488e-06	2.01447e-06	2.52344e-06	1.9521e-06	3.28839e-06	1.28149e-06	1.91969e-06
F7EUB6	1.58683e-10	2.77535e-10	7.30651e-11	6.16451e-11	1.20988e-10	1.00737e-10	2.67982e-10	5.66409e-06	2.25954e-06	2.51664e-06	5.095e-11	1.80431e-10
Q5BK32	6.47007e-07	2.00127e-10	1.01874e-10	3.04737e-10	1.42991e-06	9.80669e-07	7.45455e-11	1.74018e-06	1.79514e-10	1.20353e-06	1.20192e-06	7.62213e-11
M0RCH5	1.33478e-10	1.81603e-06	1.06086e-10	2.61065e-10	1.90442e-10	9.15556e-07	1.72368e-06	1.23924e-06	1.34084e-06	1.61162e-06	1.45198e-06	5.6043e-07
P35284	1.07786e-05	0.000162506	7.23949e-05	0.000122808	1.19244e-05	2.502e-10	0.000125849	5.56815e-05	3.87637e-05	6.17223e-05	0.000136244	2.79026e-05
F1LND7	2.98326e-06	1.99483e-06	1.61488e-06	2.78727e-06	1.84961e-06	1.52499e-06	3.15849e-06	1.66043e-06	1.44465e-06	2.97954e-06	1.00803e-06	1.34698e-06
B5DF89	2.29266e-06	2.0742e-06	1.24152e-06	2.18585e-06	1.54734e-06	1.86377e-06	2.65941e-06	1.1535e-06	1.86259e-06	1.59499e-06	1.40774e-06	8.80405e-07
P31424-2	2.2013e-06	1.40203e-06	1.91093e-06	1.81443e-06	1.47556e-06	2.07614e-06	1.78433e-06	1.37726e-06	1.5396e-06	1.59359e-06	1.78632e-06	1.42146e-06
Q63798	1.90753e-10	1.53262e-10	1.78254e-06	1.45469e-11	8.81791e-11	1.4005e-10	1.94477e-10	3.04611e-10	1.2805e-06	3.66969e-10	6.06992e-11	3.96972e-11
M0R734	2.37403e-10	2.10854e-10	1.8032e-10	1.7911e-12	1.53812e-10	6.74591e-11	1.52472e-10	1.30536e-10	2.00829e-10	3.34725e-10	2.92248e-10	1.01979e-06
G3V912	2.53504e-06	2.24443e-06	2.80203e-06	2.13516e-06	2.75648e-06	1.40478e-07	1.8161e-06	2.18753e-06	1.88698e-06	9.98184e-07	1.40691e-06	1.38431e-06
D3ZNN0	1.76738e-06	1.89354e-06	2.78424e-06	1.83183e-06	1.82867e-06	6.73242e-07	1.64409e-06	1.67531e-06	3.14401e-06	1.92051e-06	1.91303e-06	2.84816e-06
M0R8C5	2.09804e-10	2.48357e-10	1.12617e-06	2.19421e-06	2.91162e-06	1.70094e-10	2.11316e-06	2.70539e-10	1.481e-06	3.07496e-07	3.96513e-07	3.86825e-07
F1LY19	1.12239e-06	1.21039e-06	6.79199e-07	8.73754e-07	1.14476e-06	8.2225e-07	1.09052e-06	9.39657e-07	4.60098e-07	2.96794e-06	8.39822e-07	3.75484e-07
P59649	2.50785e-10	7.58809e-06	6.91957e-06	1.28975e-10	5.40257e-06	4.60419e-11	8.42868e-06	4.8577e-06	7.83441e-06	7.52858e-06	8.24021e-06	6.244e-06
Q0VGK0	1.23644e-06	1.56775e-06	1.57409e-06	1.45816e-06	1.6608e-06	1.67069e-06	2.39687e-06	9.56706e-07	1.84337e-06	2.5879e-06	1.2227e-06	1.6864e-06
A0JPM9	4.31675e-06	2.40204e-10	2.5311e-06	4.40221e-06	2.78416e-10	1.92578e-06	3.32049e-06	3.19988e-06	4.30291e-06	1.26758e-06	3.02987e-06	4.26134e-06
P62024	7.8517e-07	1.97553e-10	1.40637e-06	1.62292e-06	1.36539e-06	8.40152e-07	1.28747e-06	4.91501e-07	1.60355e-06	1.67246e-10	1.01673e-06	5.1443e-07
B0BNF6	1.37076e-07	2.56498e-06	6.70494e-07	1.54427e-06	2.81558e-06	1.906e-07	1.13818e-06	9.05267e-07	6.37299e-07	1.89946e-06	1.319e-06	2.81101e-07
Q5XID1	1.06494e-06	1.22846e-06	5.16e-07	2.72995e-07	1.26063e-06	1.07163e-06	1.68319e-06	2.14631e-10	3.18319e-07	1.79627e-06	6.92497e-11	2.0784e-07
Q5U2U2	1.30038e-10	2.73479e-10	1.18266e-06	6.95238e-07	2.06752e-10	2.78677e-07	1.78106e-10	2.65555e-10	1.06502e-06	2.15302e-10	3.13598e-10	8.12603e-11
P10499	1.67866e-06	2.19306e-06	2.01749e-06	2.50183e-06	2.49411e-06	1.75315e-06	2.40614e-06	2.2822e-06	2.78228e-06	2.90785e-06	2.94666e-06	1.61464e-06
Q6AYE2	1.00029e-12	1.08167e-10	1.08592e-06	2.67825e-10	3.32898e-06	1.93462e-10	1.32773e-06	1.34931e-06	1.39585e-10	2.1819e-10	5.13505e-06	5.80362e-07
Q5XHX3	2.44164e-06	1.93715e-06	2.04537e-06	2.95121e-06	2.1551e-06	1.83751e-06	1.98219e-06	1.67355e-06	2.18347e-06	2.42842e-06	1.97994e-06	3.46471e-06
Q704S8	1.72954e-06	1.8082e-06	1.45094e-06	1.59964e-06	1.74062e-06	8.99209e-07	1.42565e-06	5.92102e-07	1.90269e-10	8.2721e-07	1.67403e-06	1.36946e-10
Q8R4I6	6.03037e-06	9.23799e-06	8.34257e-06	8.69094e-06	7.43045e-06	6.97592e-06	8.67223e-06	7.63134e-06	7.03067e-06	8.10851e-06	5.9126e-06	6.22293e-06
P31421	3.13919e-06	1.48322e-06	1.82869e-10	2.86164e-06	1.53675e-06	1.40249e-06	1.09919e-06	1.22867e-06	3.38433e-06	2.46848e-06	3.09102e-10	7.44971e-07
F1LWX1	1.97042e-10	2.69309e-10	4.09636e-06	2.38232e-10	1.74089e-10	4.50197e-06	7.48403e-06	3.70562e-06	2.31567e-06	5.01228e-06	5.72358e-06	4.66308e-06
D3ZLX2	1.64654e-10	1.89198e-10	1.42805e-10	1.62622e-07	1.60166e-11	1.53298e-11	5.77984e-11	2.16698e-10	5.64293e-11	9.52399e-11	3.30875e-10	1.24242e-10
P63138	4.67503e-07	3.25975e-06	1.68825e-06	2.55399e-06	1.79769e-10	3.5921e-06	2.21744e-06	2.30714e-06	1.01265e-10	4.14449e-06	1.18456e-06	7.38527e-11
Q62871-2	2.26468e-06	1.68706e-06	1.40885e-06	2.01001e-06	1.87511e-06	2.34025e-06	8.8995e-11	1.60846e-06	1.40394e-06	2.39574e-06	2.29748e-06	1.00168e-06
F1LQX4-2	2.76371e-06	3.58825e-06	6.20918e-11	2.91031e-06	1.94784e-06	2.85565e-06	2.77231e-06	1.43795e-06	6.88963e-11	2.33997e-06	1.36789e-10	9.09914e-07
P35467	2.49937e-10	1.87918e-10	5.16381e-07	2.12783e-10	5.89861e-11	1.89797e-10	2.30514e-10	1.98462e-10	5.99913e-11	2.28634e-10	3.19557e-10	3.39991e-11
F1M542	2.52403e-06	5.22154e-06	2.36404e-06	2.22279e-06	6.59597e-07	2.20888e-06	3.84845e-06	1.96839e-06	4.05719e-06	3.24804e-06	1.18331e-06	1.9128e-10
M0R6K8	2.503e-10	1.00416e-10	2.27435e-06	1.55693e-06	2.51332e-10	1.70788e-10	1.06854e-06	3.00594e-10	3.87341e-11	1.67421e-11	2.05246e-06	8.51934e-07
F1M9Y7	7.62263e-07	6.8199e-07	1.60609e-06	1.62121e-06	1.0464e-06	8.50991e-07	1.03305e-06	1.32373e-06	1.15391e-06	1.23524e-06	1.0667e-06	5.84299e-07
D4A7Y9	1.4095e-12	1.61344e-10	1.22128e-10	7.95718e-11	1.54001e-07	2.34988e-10	7.65828e-11	3.9942e-08	1.43469e-10	3.14786e-10	1.83349e-12	4.11385e-11
D3ZT90	6.91067e-07	1.55156e-06	2.71607e-06	9.37557e-07	1.5503e-06	1.19346e-06	1.43488e-06	1.2325e-06	9.3234e-07	1.58593e-06	1.58253e-06	1.13523e-06
B0BMZ1	9.74982e-11	9.11837e-11	8.48043e-11	6.62709e-11	1.73197e-07	3.68911e-11	1.74016e-10	2.29867e-10	1.88006e-10	7.11732e-11	1.78096e-10	9.67236e-11
Q3B8Q2	2.11589e-05	8.45961e-06	9.58808e-06	1.07727e-05	1.0438e-05	2.10492e-05	2.10004e-05	1.22761e-05	2.2492e-05	9.05514e-06	1.51644e-05	8.62101e-06
Q91XU8	7.54652e-06	7.51275e-06	8.91394e-06	1.05837e-05	7.77464e-06	3.46403e-06	6.37052e-06	2.22929e-06	5.55743e-06	7.15181e-06	7.00968e-06	5.62344e-06
Q71UF4	1.57031e-06	1.03435e-06	2.72038e-06	1.61496e-06	1.58798e-06	1.84526e-06	2.36376e-06	7.15637e-07	2.95331e-06	1.92076e-06	2.79245e-06	2.19355e-06
D3ZA93	8.9799e-11	4.46787e-11	1.45098e-06	1.76416e-10	2.01452e-11	1.30991e-10	2.82446e-10	3.6005e-06	9.35423e-07	2.1536e-10	2.95721e-10	1.22298e-10
F1M9F7	1.56233e-06	1.76685e-06	1.33477e-06	9.93477e-07	1.18638e-06	6.88132e-07	8.97114e-07	9.13705e-07	1.54987e-06	1.54896e-06	1.47875e-06	5.7343e-07
Q6MG82	5.2405e-06	1.12469e-05	8.51863e-06	6.87098e-06	4.76074e-06	1.11589e-05	7.62966e-06	6.73105e-06	7.57603e-06	5.30595e-06	5.54641e-06	1.50454e-10
M0R9C7	5.30913e-11	1.16018e-10	1.43682e-10	2.53885e-10	5.50479e-12	2.61209e-10	2.52449e-10	4.22061e-11	1.92303e-10	1.40312e-10	2.27917e-10	1.33415e-10
F1M6A8	6.19878e-12	1.27882e-10	1.94085e-10	1.22901e-10	7.75209e-11	1.42302e-10	1.12649e-10	3.14062e-10	2.09872e-10	1.16502e-06	2.80648e-10	5.24567e-08
G3V6C3	1.79037e-10	4.62605e-11	1.33726e-10	5.40446e-12	8.5983e-11	6.90284e-08	2.57723e-10	2.70373e-11	7.34925e-11	6.27053e-11	1.80811e-10	9.72263e-11
O08679	9.64128e-07	1.99083e-06	9.47556e-07	1.55654e-06	2.586e-06	1.39093e-07	1.99427e-06	5.88131e-07	1.37818e-06	1.91587e-06	5.96761e-07	8.89731e-08
Q9JIR4-2	2.56867e-06	1.54402e-06	2.25557e-06	2.03577e-06	1.55899e-06	1.65594e-06	1.78876e-06	2.04989e-06	1.31328e-06	2.04573e-06	2.98869e-06	5.66385e-07
Q5M7A4	1.19668e-05	2.20212e-06	1.0364e-06	1.36746e-05	1.56638e-10	4.57015e-11	1.2303e-05	1.54272e-10	2.03587e-10	1.6465e-10	1.70004e-10	6.30182e-07
O08560	1.70715e-06	6.52901e-07	1.05737e-06	1.69552e-06	8.24155e-07	1.69669e-06	1.70758e-06	6.34339e-07	9.4125e-07	1.53133e-06	1.22811e-06	9.22993e-07
D3ZKQ4	1.0261e-06	1.42875e-06	1.51305e-06	1.83331e-06	1.94718e-06	1.44462e-10	1.85335e-06	1.11152e-06	5.71145e-07	1.72946e-06	1.94502e-06	8.04444e-07
D3ZZC1	1.04823e-06	8.72798e-07	1.31808e-06	2.59416e-07	2.55709e-10	7.27273e-07	1.49263e-06	3.28731e-10	1.26751e-06	3.548e-11	1.64438e-06	1.52923e-10
Q6AYD5	2.0226e-06	2.86205e-06	7.94195e-07	1.54828e-06	4.0642e-06	1.83561e-06	2.6354e-06	1.23696e-06	2.05445e-06	2.86305e-06	1.24061e-06	1.42468e-06
D3ZX63	1.28219e-11	1.35388e-10	5.14408e-11	2.85346e-10	2.83057e-10	3.4875e-11	3.5835e-12	2.12748e-10	1.29048e-10	2.74074e-10	2.08119e-10	6.75001e-07
P28073	4.26957e-06	4.02032e-06	7.78114e-06	3.93078e-06	5.16466e-06	6.70391e-06	4.27041e-06	5.96101e-06	4.76512e-06	4.12494e-06	6.54313e-06	6.28884e-06
F1LYA6	8.87502e-06	9.73797e-06	9.7121e-06	8.45142e-06	9.29656e-06	4.12501e-06	9.45777e-06	7.54704e-06	1.05036e-05	9.09482e-06	9.21521e-06	7.27634e-06
Q02356	1.74841e-06	1.90914e-06	7.24641e-06	1.73034e-06	1.76833e-06	6.92451e-07	2.07179e-06	1.9968e-06	2.87429e-06	1.85242e-06	2.4458e-06	2.24928e-06
P48284	1.61759e-10	1.69167e-10	6.27064e-11	2.30275e-07	7.71988e-11	1.78276e-10	1.02722e-10	9.29093e-08	1.73999e-10	2.60316e-10	1.12412e-07	1.25896e-10
Q3B8P4	1.5195e-06	2.54233e-07	5.54916e-11	1.24349e-10	1.35043e-10	6.42256e-11	1.84218e-10	1.54489e-10	1.45526e-10	1.81934e-10	1.9666e-10	1.92453e-10
Q6AY58	2.76525e-06	2.75875e-06	2.40934e-06	3.25406e-06	3.80347e-06	4.48244e-11	3.39279e-06	3.01252e-06	2.87792e-06	3.50692e-06	2.08023e-06	1.4847e-06
F1LPE9	2.93141e-06	4.11393e-06	3.39321e-06	1.97252e-06	1.88789e-06	3.70594e-06	3.44395e-06	1.28164e-06	3.1297e-06	4.36372e-06	2.59013e-06	2.54461e-06
Q6AXX5	2.0947e-10	3.3678e-11	5.77085e-11	1.59073e-06	4.87461e-07	2.25824e-11	7.10966e-07	2.41218e-10	1.21587e-06	2.08811e-10	3.78276e-07	4.48533e-07
G3V8F5	1.57516e-10	1.08815e-06	3.60561e-06	1.30938e-10	1.14254e-10	1.31659e-10	1.0684e-10	5.57308e-07	2.349e-06	1.06227e-10	3.07198e-10	7.88023e-11
D3ZLP9	4.28913e-11	1.64206e-10	6.04392e-11	2.37905e-10	2.08421e-10	1.37026e-10	2.77548e-10	3.22397e-10	1.16966e-05	1.51648e-10	2.45212e-10	6.21547e-11
Q6MG85	3.80126e-06	3.63613e-06	2.33789e-06	3.36635e-06	5.28716e-06	3.71229e-07	3.11344e-06	1.60118e-06	1.80388e-06	5.15119e-06	4.94525e-06	8.19864e-07
Q80W98	1.87024e-10	1.03004e-10	1.2608e-06	1.60608e-10	1.28454e-06	1.74296e-06	1.40529e-06	2.60388e-10	1.55185e-06	1.2102e-06	9.20737e-07	1.27101e-06
P97610	1.71718e-06	1.6175e-06	2.2188e-06	1.3093e-06	1.64676e-06	4.16757e-07	2.00549e-06	5.6078e-07	2.05617e-06	2.01606e-06	1.65679e-06	8.71399e-07
M0R5M7	5.8214e-11	1.92036e-07	2.08048e-07	8.53344e-11	2.58761e-07	1.68798e-10	7.24647e-11	1.33986e-10	2.9289e-11	5.24267e-07	1.70445e-07	2.0005e-10
D3ZWX4	1.85951e-06	1.98954e-06	2.58496e-06	2.93739e-06	1.49689e-06	1.74431e-06	2.8795e-06	2.51967e-06	2.20352e-06	2.08684e-06	2.46377e-06	8.42673e-07
B5DFL0	7.11572e-11	1.71223e-10	1.22312e-06	1.08554e-06	2.36003e-10	2.10949e-06	8.42368e-07	1.06666e-06	1.74314e-06	1.23511e-06	2.59122e-10	2.13737e-10
D3ZA85	7.98718e-12	2.12407e-10	1.38694e-10	1.76463e-10	1.86958e-11	2.02914e-11	1.60615e-06	1.9654e-06	1.04624e-06	3.04203e-06	2.53823e-06	1.5022e-06
M0R3L0	6.85807e-11	5.70456e-11	5.73712e-07	5.08206e-11	8.63051e-11	8.66378e-11	2.45036e-10	8.41955e-11	5.18723e-07	2.11175e-10	3.39549e-11	1.66643e-10
D3ZJH9	1.45539e-06	1.37918e-06	6.76558e-06	1.12051e-05	1.71327e-06	5.18326e-06	2.23824e-10	2.11254e-06	1.15618e-05	2.7202e-10	2.16829e-06	1.03405e-10
Q9Z0V5	7.14864e-06	8.74673e-06	1.79305e-05	8.77707e-06	8.51383e-06	1.57437e-05	6.19457e-06	7.4416e-06	1.53895e-05	1.09029e-05	6.80317e-06	2.00699e-05
F1M403	3.00863e-06	3.74335e-06	3.9172e-06	3.58784e-06	2.86013e-06	1.35752e-06	3.35477e-06	1.23907e-06	3.32271e-06	3.24207e-06	3.07621e-06	1.13581e-06
F2Z3T9	1.20632e-06	1.14495e-06	1.43775e-06	1.03137e-06	1.30079e-06	8.16498e-07	1.33933e-06	3.82555e-11	7.3919e-07	1.41819e-06	1.41224e-06	1.01781e-06
Q3MIE4	2.39349e-06	5.04655e-06	3.32932e-06	4.6435e-06	3.76283e-06	2.01236e-06	5.21613e-06	2.3729e-06	2.9833e-06	2.53513e-06	1.95217e-06	1.13168e-06
Q32PX7	1.72106e-06	1.94637e-06	1.52519e-06	2.07419e-06	1.69099e-06	1.32562e-10	2.41066e-06	1.15555e-06	1.56909e-06	1.85303e-06	8.48853e-07	6.82204e-07
P49185	2.41564e-06	2.12008e-06	2.58317e-06	2.90019e-10	1.0304e-06	3.84771e-07	2.83895e-06	6.72523e-07	1.79127e-06	2.55309e-06	1.20324e-06	9.80473e-07
M0R718	8.18118e-11	1.23222e-06	5.60018e-07	1.07734e-06	1.15996e-10	2.21006e-10	7.92355e-07	2.42669e-10	1.3168e-11	3.38853e-10	1.75416e-11	8.22547e-11
F1M6F4	1.09168e-05	1.32532e-05	1.61265e-10	1.20025e-05	1.37384e-05	1.00517e-05	1.47453e-05	1.07668e-05	1.19322e-05	1.23458e-05	1.38554e-05	1.02022e-05
D3ZJX5	4.15887e-07	7.50637e-12	1.80258e-06	1.56215e-11	2.61302e-10	1.09478e-06	2.03031e-10	1.08106e-06	1.47594e-06	3.09418e-10	1.27287e-10	8.32197e-07
F1LQX9	7.18575e-07	6.7475e-07	5.63183e-07	1.10711e-06	6.33347e-07	2.48904e-10	8.34398e-07	5.32548e-07	4.58825e-07	7.19923e-07	8.42695e-07	2.51196e-07
F1M5M9	1.24411e-06	2.09936e-06	1.65313e-06	1.69656e-06	1.95152e-06	1.30197e-06	1.98441e-06	1.28025e-06	1.99334e-06	2.1635e-06	1.0517e-06	1.66529e-06
F1LP60	6.91699e-06	9.09323e-06	7.2526e-06	7.6168e-06	7.38011e-06	2.24368e-06	8.66432e-06	5.60322e-06	8.5574e-06	8.75091e-06	7.08802e-06	4.60675e-06
O88321	6.72843e-06	4.28934e-06	4.04338e-06	9.5349e-07	4.37441e-06	2.1102e-06	1.95121e-06	5.0483e-06	3.33434e-06	4.04376e-06	5.66308e-06	3.84008e-06
contaminant_P35527	2.17442e-10	2.04757e-10	9.70373e-11	2.91249e-11	1.33755e-10	1.24354e-10	1.45652e-11	4.56091e-07	2.11147e-10	3.86211e-10	1.72044e-06	2.06732e-10
Q5XI39	1.77678e-06	1.74332e-06	2.24898e-06	2.71843e-10	1.25365e-06	1.6512e-10	1.80736e-06	1.93161e-10	3.19716e-07	1.9285e-06	3.40113e-10	5.85682e-11
G3V734	2.08964e-06	2.98975e-06	2.50624e-06	1.66549e-06	1.96474e-06	1.88684e-10	2.74167e-10	9.77519e-07	1.81989e-06	1.86004e-10	1.27628e-06	9.3169e-07
F1LU48	1.53182e-06	2.6012e-10	1.21057e-06	1.4208e-06	1.78707e-06	1.2205e-10	1.64696e-10	4.08902e-07	1.31806e-10	1.37859e-06	1.53396e-10	8.00648e-11
Q6RJR6-2	1.94404e-05	1.91971e-05	1.86773e-05	1.57937e-05	1.83797e-05	2.85718e-05	1.87282e-05	1.6718e-05	1.59191e-05	1.56967e-05	1.76548e-05	1.14172e-05
Q9ES21	5.70636e-07	8.28911e-07	1.83283e-06	9.8613e-07	2.19458e-06	1.41253e-06	1.10125e-06	2.021e-06	2.07443e-06	1.05681e-06	1.40451e-06	9.3294e-07
P84850	4.60656e-07	3.51304e-11	2.00714e-06	1.66557e-10	9.64983e-07	7.98819e-07	1.70346e-10	2.52253e-10	5.20514e-11	4.05375e-11	3.36957e-10	1.30631e-06
P45953	1.05017e-06	1.02622e-06	6.33225e-07	1.22459e-06	2.71386e-06	1.11254e-06	3.18968e-06	6.01076e-07	1.00794e-10	1.4328e-06	2.7178e-10	9.63458e-07
Q5BK23	2.85856e-10	1.72488e-10	1.24657e-10	2.13484e-10	1.97513e-10	7.5615e-11	5.00967e-11	6.83766e-11	1.16064e-10	3.43755e-10	2.91385e-10	6.14508e-12
P01835	1.10487e-11	1.05664e-06	5.00704e-11	2.03999e-10	1.5674e-10	1.05712e-10	4.3291e-11	5.25742e-06	1.42163e-06	2.56473e-06	6.02914e-07	1.33616e-10
P54287	5.8005e-07	6.38845e-07	8.13111e-07	4.19698e-07	5.60086e-07	6.46707e-11	6.39704e-07	4.74166e-07	5.52908e-07	6.24463e-07	6.94449e-07	3.08982e-07
G3V986	8.34333e-07	2.45135e-06	1.57687e-06	1.72012e-06	4.06857e-06	2.13128e-06	2.62419e-10	1.56256e-10	2.43182e-06	1.35821e-06	2.89007e-06	9.21245e-07
B0BNB9	2.08523e-06	9.19579e-07	1.34806e-06	2.61951e-06	1.32949e-06	4.47426e-07	2.74763e-06	7.73439e-07	1.64226e-06	1.79442e-06	3.01292e-10	1.21572e-10
Q9ESB5	1.4374e-06	1.79134e-06	2.43083e-07	1.41435e-10	1.15323e-07	1.30937e-06	1.42473e-11	1.97729e-07	2.28718e-07	1.43664e-10	1.60068e-07	4.94117e-07
D4A3E1	8.74846e-07	6.94432e-07	8.43472e-07	1.1191e-06	9.98483e-07	6.07618e-07	1.23329e-06	7.3075e-07	1.50858e-06	1.17332e-06	9.37708e-07	9.73216e-07
F1M7V5	2.55302e-10	1.90679e-10	1.42664e-10	8.87142e-11	1.10667e-10	1.32365e-10	1.29541e-10	2.48903e-10	1.08412e-10	2.1474e-10	3.08133e-10	9.27572e-11
D3ZKK5	1.54028e-06	1.09468e-06	1.52543e-06	1.34049e-06	1.47505e-06	9.1647e-07	1.85703e-06	6.58382e-07	1.32344e-06	1.53126e-06	6.32304e-07	1.41125e-07
P05508	2.76884e-07	1.01707e-08	8.965e-08	4.61282e-07	4.77455e-06	1.03748e-10	9.01041e-07	5.09043e-06	3.43601e-06	4.02877e-06	2.9484e-06	2.78272e-06
P56932	5.11684e-06	5.75524e-06	5.59739e-06	4.24549e-06	3.69885e-06	2.34479e-06	3.11715e-06	1.55405e-06	4.29261e-06	4.83477e-06	2.58563e-06	3.74082e-06
Q07647	8.7283e-06	8.77753e-06	1.05016e-05	6.32858e-06	8.68606e-06	6.64754e-06	9.27645e-06	1.1134e-05	1.10949e-05	9.30469e-06	1.00849e-05	7.89145e-06
Q7TPJ7	1.50741e-10	4.43049e-11	9.29361e-11	1.7179e-11	1.58702e-11	2.07221e-10	1.56749e-10	9.00797e-11	1.51144e-10	2.24662e-10	1.2979e-10	1.62093e-06
D3ZKR8	9.35721e-07	7.52919e-07	1.17092e-06	7.86081e-07	8.83582e-07	1.29904e-10	8.40401e-07	7.73262e-07	8.3762e-07	6.97239e-07	5.00536e-07	9.99628e-07
Q76IJ9	5.67521e-07	7.86901e-07	4.93513e-07	1.94339e-06	8.2156e-07	1.0005e-06	2.33477e-06	5.19668e-07	1.01184e-06	1.30121e-06	1.24506e-06	1.34154e-06
Q62824	1.13213e-06	9.51971e-07	5.01611e-11	1.51829e-06	9.02617e-07	8.26623e-07	1.68806e-06	6.76077e-07	8.50534e-07	1.55124e-06	1.2998e-06	3.48716e-07
P05982	4.21814e-07	2.32166e-10	3.34786e-06	5.94699e-07	1.63984e-06	2.59036e-10	9.81285e-07	1.80793e-10	3.26262e-06	1.24608e-06	1.72703e-06	1.56941e-06
Q8K585	8.20846e-11	1.19714e-10	1.67801e-06	8.55992e-11	2.44218e-06	1.02619e-06	2.59255e-10	6.03421e-12	6.55297e-11	2.83898e-10	8.95239e-11	1.0555e-10
M0RAE4	1.09471e-10	1.45885e-10	9.89924e-07	1.48771e-10	1.46785e-10	7.49735e-11	1.50362e-10	1.55106e-10	5.80794e-07	1.10529e-10	3.21831e-10	8.45786e-11
E9PTX9	2.49134e-06	2.69771e-06	2.87746e-06	2.45662e-06	1.93796e-06	1.15224e-06	2.22444e-06	2.06745e-06	3.9739e-06	2.61625e-06	2.48734e-06	2.76588e-06
P04094	2.29704e-10	1.08842e-10	7.00623e-11	1.83284e-10	1.3617e-10	2.57439e-10	1.53281e-06	4.6269e-07	1.60521e-11	3.58559e-10	2.52352e-10	6.88584e-11
D4ADL8	8.97731e-07	1.36553e-06	8.97803e-07	2.10309e-06	9.78198e-07	1.96542e-07	9.03281e-07	2.46352e-10	9.64671e-07	7.60068e-07	9.95199e-11	8.52575e-07
M0RDY2	7.9205e-11	1.03651e-10	1.34714e-10	1.44846e-11	2.65445e-10	3.11571e-11	2.05878e-10	4.78736e-11	7.95135e-12	8.65207e-07	5.90244e-11	6.56518e-11
P27867	1.39235e-06	1.57593e-06	7.06399e-07	8.44188e-07	8.74031e-11	1.04943e-06	5.39375e-07	8.78124e-07	1.32094e-06	1.10335e-10	8.19881e-07	1.2682e-06
P17475	1.4095e-12	1.55218e-10	1.41263e-10	3.73017e-11	2.54684e-10	1.86524e-10	3.02249e-06	1.79091e-06	3.55886e-06	2.8412e-06	7.10832e-11	6.76629e-11
F1LSM3	8.06028e-07	9.19524e-07	6.19117e-07	1.26653e-06	2.82516e-10	2.06472e-07	1.12952e-06	3.75524e-07	7.93617e-07	9.39277e-07	2.57518e-10	1.50442e-07
Q9QYU2	6.3852e-11	3.89699e-12	8.63994e-07	5.42627e-11	9.91301e-11	6.09495e-07	1.85807e-10	2.0358e-10	2.08711e-10	1.03359e-10	6.41723e-11	9.23438e-11
P0CC10	1.9939e-06	1.2175e-06	1.89006e-10	3.56698e-06	5.77124e-11	2.08352e-06	3.26442e-06	6.50683e-07	1.46169e-10	3.24039e-06	3.25016e-06	4.13731e-11
M0R4S2	6.28062e-11	1.19177e-06	1.52458e-10	1.5827e-06	2.24174e-10	1.08291e-10	1.10871e-06	8.57594e-07	1.35918e-06	1.04755e-06	2.62683e-11	2.02866e-10
D3ZFC8	4.23154e-11	1.83489e-10	4.3174e-06	3.16169e-11	2.85883e-10	6.79435e-12	3.59361e-11	2.45602e-10	5.57054e-11	1.87631e-10	1.98035e-10	1.81693e-10
P11762	2.41601e-10	7.05484e-11	5.0806e-11	2.32563e-10	1.46477e-06	2.52491e-10	3.91264e-07	6.61596e-11	7.55837e-11	2.37858e-10	1.73142e-10	7.28789e-07
P31422	1.61417e-06	2.37802e-06	1.68508e-06	3.1772e-06	1.61662e-06	1.73545e-06	1.66578e-06	1.85135e-06	3.49752e-06	3.14416e-06	2.59458e-06	1.49749e-06
P01355	2.94283e-10	2.80713e-10	4.16968e-11	2.47079e-10	6.17824e-11	6.81839e-07	1.77181e-10	8.72793e-11	1.80399e-12	1.11052e-10	1.70833e-06	1.77392e-10
G3V8D6	1.63582e-06	2.46947e-06	4.59765e-06	2.30742e-06	2.77626e-06	4.00676e-06	2.04004e-06	1.68592e-06	3.56874e-06	2.71739e-06	2.6933e-06	1.23225e-06
Q3B8N9	2.93328e-10	1.65173e-06	1.8431e-10	2.63837e-11	2.72545e-10	6.02846e-07	1.34061e-06	1.20484e-10	1.41419e-06	1.47261e-06	1.31096e-06	8.87042e-07
D3ZRM5	1.1229e-10	2.67123e-10	5.16589e-07	1.4483e-10	1.21588e-10	7.84296e-11	7.31005e-11	1.42137e-10	3.39789e-07	1.38723e-10	1.617e-10	1.56532e-10
P18163	2.35415e-06	3.40945e-06	2.72647e-06	1.95744e-10	2.989e-07	1.46779e-10	2.95801e-06	1.31019e-11	3.68725e-06	3.9335e-06	1.00576e-06	1.4341e-06
P29994-8	2.58059e-06	1.64799e-06	2.41795e-06	2.41973e-06	2.18888e-06	1.33852e-06	2.34989e-06	1.50075e-06	1.83336e-06	2.60066e-06	2.65289e-06	8.46562e-07
Q8K1Q0	2.67642e-06	3.29299e-06	2.45267e-06	2.13701e-06	3.63274e-06	1.05367e-06	1.9279e-06	2.69642e-06	1.72781e-06	3.15559e-06	2.53338e-06	1.20214e-06
Q99MI7	1.86374e-06	1.87099e-06	1.14833e-06	1.98355e-06	1.5536e-06	4.86482e-07	2.57486e-06	1.04158e-06	1.41803e-10	5.57488e-11	3.49104e-10	2.13391e-10
P63031	2.09319e-10	3.71688e-06	2.88554e-06	1.68317e-10	1.34047e-10	1.93593e-10	7.00805e-11	3.09111e-10	2.28199e-11	3.55537e-10	6.96199e-11	2.26697e-06
O35314	2.44838e-06	2.73469e-06	1.4078e-06	2.59095e-06	2.14294e-06	1.07844e-06	3.6957e-06	2.44513e-06	1.30657e-10	3.84881e-06	2.73676e-06	2.06234e-06
O54861	1.88781e-06	1.27769e-06	1.62469e-06	3.97409e-06	1.70909e-06	1.59172e-06	5.00469e-07	1.50896e-06	4.2088e-07	3.09033e-06	5.66904e-07	9.69128e-07
D4A5I9	1.02575e-06	1.53129e-06	8.58923e-07	1.58687e-06	1.45713e-06	9.79859e-07	1.01357e-06	5.8177e-07	1.52676e-06	9.26701e-07	5.95304e-06	6.27357e-07
Q6IRL2	1.78565e-06	2.08658e-06	1.42789e-06	2.28062e-06	1.80024e-06	1.17638e-10	2.08428e-06	1.69424e-06	1.60043e-06	2.07847e-06	1.31557e-06	9.63269e-07
D4A304	1.42062e-06	1.36202e-06	1.60033e-06	1.35066e-06	2.44974e-06	1.61354e-06	2.00607e-06	2.36447e-06	1.2121e-06	2.1827e-06	2.66384e-06	1.51281e-06
Q8K4V4-2	9.07877e-07	1.19151e-06	1.26517e-06	2.06477e-06	1.35133e-06	1.5436e-07	2.3154e-10	1.18533e-06	5.5521e-07	1.48567e-06	1.35575e-06	4.08464e-07
D3Z941	1.05031e-10	1.96158e-06	2.09841e-06	2.05567e-06	3.12721e-06	8.47787e-07	2.56171e-06	2.95219e-06	2.0257e-06	2.425e-06	2.75179e-06	1.01977e-06
F1LPV8	1.75642e-10	3.74432e-07	1.72986e-06	2.53605e-10	2.70232e-10	1.56126e-10	2.68069e-10	3.05161e-10	7.02522e-11	6.88673e-11	1.21822e-10	8.12748e-07
D4A0A1	1.16211e-06	3.66816e-06	1.97531e-06	2.06368e-06	2.71475e-06	5.56968e-07	1.75367e-06	1.31278e-06	1.64445e-06	2.3596e-06	2.3975e-06	1.25837e-06
Q641X8	8.66974e-07	1.67046e-06	1.43874e-06	1.17004e-06	4.97065e-07	3.38e-07	1.10883e-06	6.48449e-07	9.33382e-07	2.00085e-06	4.52923e-07	5.88848e-07
P11661	1.17512e-05	1.96268e-05	1.63375e-05	8.55142e-06	1.72183e-05	7.27676e-06	1.17659e-05	1.48379e-05	1.44544e-05	1.64255e-05	1.41178e-05	3.23455e-11
M0R9D5	1.07334e-10	2.04126e-06	1.74662e-06	2.81907e-06	2.23944e-06	1.21748e-10	2.24501e-06	1.83644e-06	3.69238e-06	2.39232e-06	1.60935e-06	2.4558e-11
P23514	2.00897e-06	9.29783e-07	1.27559e-10	7.72868e-07	1.15381e-10	1.02035e-06	1.86751e-06	7.46591e-07	1.3278e-06	3.84546e-07	7.80461e-07	6.43557e-11
D4A2K5	5.16992e-07	1.38799e-06	1.1052e-10	6.04333e-07	2.85019e-10	8.64797e-07	8.85635e-07	1.2857e-06	2.12882e-10	1.30744e-06	1.8959e-10	3.64571e-11
Q505J8	1.15876e-06	9.35659e-07	5.87982e-07	9.08329e-07	2.76279e-10	1.1772e-06	1.30063e-06	5.16434e-07	1.43561e-10	4.90493e-07	7.55383e-07	6.66078e-06
Q5U1W6	1.07175e-06	1.32995e-06	8.33664e-07	1.15206e-06	1.12757e-06	4.39431e-07	1.04976e-06	1.26248e-06	6.05912e-07	9.69725e-07	9.33478e-07	6.82999e-07
P63281	1.81223e-06	2.02526e-06	2.61662e-06	1.73285e-06	1.89403e-06	2.01346e-06	2.06963e-06	2.13448e-10	2.12584e-10	8.07026e-07	1.74436e-06	8.28297e-07
Q62876	3.25822e-05	2.4282e-05	5.3083e-05	3.35691e-05	3.51466e-05	8.15409e-06	2.52423e-05	2.6593e-05	2.91287e-05	2.69214e-05	2.20045e-05	2.11317e-05
G3V9W0	1.65351e-10	2.83171e-10	8.82735e-07	4.59571e-07	1.75172e-10	1.01357e-06	4.2778e-07	1.79626e-10	6.40435e-07	6.55778e-07	6.96287e-07	1.09348e-06
Q5PQL7	2.15171e-06	1.7059e-10	5.15618e-11	2.39167e-10	2.16893e-06	8.08155e-07	1.52429e-10	3.35398e-06	1.69558e-06	1.15044e-10	2.63077e-06	1.60988e-07
Q6IRG7	1.68943e-05	2.70342e-05	1.80028e-05	3.471e-05	1.494e-05	2.63544e-05	1.67284e-05	1.36806e-05	2.45091e-05	2.09628e-05	1.70006e-05	2.07932e-05
D4A6U1	1.16509e-06	3.82321e-06	2.19324e-06	3.06299e-06	1.9732e-06	1.34431e-06	3.38727e-06	1.42186e-06	1.46951e-10	3.42872e-06	3.29246e-06	9.48689e-11
D3ZS75	2.64066e-06	2.00385e-06	8.42804e-11	2.63976e-06	2.55255e-06	1.28464e-10	1.8401e-06	1.60391e-06	2.17823e-10	2.18026e-06	1.90383e-06	4.01665e-11
[truncated: 2,092 more rows]

## Sheet: Identification
Accession	Description	ΣCoverage	Σ# Unique Peptides	Σ# Peptides	Σ# PSMs	# AAs	MW [kDa]	calc. pI	Score_Naive1	Coverage_Naive1	# Peptides_Naive1	# PSM_Naive1	Score_Sham1	Coverage_Sham1	# Peptides_Sham1	# PSM_Sham1	Score_MCAO1	Coverage_MCAO1	# Peptides_MCAO1	# PSM_MCAO1	Score_MCAO+DHI1	Coverage_MCAO+DHI1	# Peptides_MCAO+DHI1	# PSM_MCAO+DHI1	Score_Naive2	Coverage_Naive2	# Peptides_Naive2	# PSM_Naive2	Score_Sham2	Coverage_Sham2	# Peptides_Sham2	# PSM_Sham2	Score_MCAO2	Coverage_MCAO2	# Peptides_MCAO2	# PSM_MCAO2	Score_MCAO+DHI2	Coverage_MCAO+DHI2	# Peptides_MCAO+DHI2	# PSM_MCAO+DHI2	Score_Naive3	Coverage_Naive3	# Peptides_Naive3	# PSM_ Naive3	Score_Sham3	Coverage_Sham3	# Peptides_Sham3	# PSM__Sham3	Score_MCAO3
D4A133	Protein Atp6v1a OS=Rattus norvegicus GN=Atp6v1a PE=3 SV=1 - [D4A133_RAT]	91.73	48	48	974	617	68.2216	5.57959	159.196	61.75	33	53	134.846	61.26	32	48	166.327	71.8	37	58	151.512	65.64	35	54	168.99	60.78	32	55	174.031	82.66	40	61	164.467	70.34	37	57	170.241	70.66	35	55	112.329	66.29	33	51	122.755	71.8	35	54	108.878
Q5XIF6	Tubulin alpha-4A chain OS=Rattus norvegicus GN=Tuba4a PE=2 SV=1 - [TBA4A_RAT]	90.85	9	35	2851	448	49.8924	5.05908	512.36	84.82	27	145	524.042	87.05	27	161	544.653	87.05	27	164	585.711	87.05	28	168	614.699	84.82	27	164	579.556	84.82	27	164	587.918	85.71	29	159	636.719	90.85	32	173	453.692	78.57	28	163	351.066	87.05	29	139	410.783
V9GZ85	Actin, cytoplasmic 2 (Fragment) OS=Rattus norvegicus GN=LOC100361457 PE=3 SV=1 - [V9GZ85_RAT]	89.3	14	36	1905	374	41.5927	5.70654	317.3	86.63	27	98	357.689	86.63	27	108	383.659	86.63	26	108	356.298	86.63	27	105	395.181	87.17	27	107	370.018	86.63	26	102	397.033	87.97	31	113	458.671	89.3	33	130	284.398	86.63	26	103	216.423	66.84	23	86	280.859
P04642	L-lactate dehydrogenase A chain OS=Rattus norvegicus GN=Ldha PE=1 SV=1 - [LDHA_RAT]	89.16	28	31	600	332	36.4273	8.26514	79.8437	78.92	25	36	88.1205	64.46	23	36	86.3009	78.31	24	35	102.603	75.9	24	38	81.2686	63.25	21	32	91.0169	75.9	24	35	87.3362	78.61	24	33	98.8764	72.59	22	35	62.4092	69.28	24	33	46.4643	68.07	19	26	48.1283
Q9QYU4	Ketimine reductase mu-crystallin OS=Rattus norvegicus GN=Crym PE=1 SV=1 - [CRYM_RAT]	89.14	18	18	269	313	33.5331	5.52881	41.5536	56.55	12	13	40.2152	50.8	12	13	35.7359	51.12	12	12	35.0651	40.26	11	11	38.4745	54.31	11	12	41.3136	54.31	12	13	65.6422	68.05	14	20	59.8839	67.41	14	20	42.342	62.3	13	17	37.2701	43.13	11	16	33.5439
P50398	Rab GDP dissociation inhibitor alpha OS=Rattus norvegicus GN=Gdi1 PE=1 SV=1 - [GDIA_RAT]	89.04	29	36	655	447	50.5042	5.13525	122.622	80.31	26	38	118.475	83.67	27	37	134.695	82.1	27	39	140.043	84.34	31	41	125.228	78.08	28	37	95.132	70.25	22	31	125.514	72.93	23	34	147.702	84.34	28	40	95.4567	67.11	27	37	89.5124	72.48	27	35	91.8627
Q00981	Ubiquitin carboxyl-terminal hydrolase isozyme L1 OS=Rattus norvegicus GN=Uchl1 PE=1 SV=2 - [UCHL1_RAT]	87.44	16	16	503	223	24.8224	5.23682	73.145	81.17	11	22	106.754	84.75	14	33	105.26	81.17	12	30	96.9835	84.75	12	28	97.2237	81.17	11	27	116.423	84.75	13	34	106.786	84.75	12	28	114.472	87.44	13	29	55.8952	81.17	11	29	44.7233	71.3	12	19	62.2962
Q63716	Peroxiredoxin-1 OS=Rattus norvegicus GN=Prdx1 PE=1 SV=1 - [PRDX1_RAT]	87.44	16	18	311	199	22.0953	8.1333	43.3072	72.36	10	16	57.6987	77.39	13	21	53.5697	66.83	11	16	57.0635	75.38	13	19	49.9004	58.29	9	16	47.5807	70.85	10	16	56.185	62.31	10	16	63.1062	76.38	12	19	37.9375	63.82	12	18	36.2168	62.81	11	17	41.945
P85973	Purine nucleoside phosphorylase OS=Rattus norvegicus GN=Pnp PE=1 SV=1 - [PNPH_RAT]	86.51	19	19	266	289	32.281	6.93213	46.7303	64.36	13	15	39.4923	64.71	13	14	51.9906	66.78	14	17	49.9572	60.21	13	16	59.0437	70.24	15	19	58.7334	62.98	13	16	54.0977	67.13	14	17	65.8753	69.9	15	20	30.6533	49.83	10	10	36.0197	66.09	13	14	33.1191
P48500	Triosephosphate isomerase OS=Rattus norvegicus GN=Tpi1 PE=1 SV=2 - [TPIS_RAT]	86.35	18	18	600	249	26.8318	7.23975	98.1285	75.5	15	29	87.3962	71.08	13	27	112.382	75.5	16	35	105.344	64.66	12	30	109.094	76.71	15	31	119.541	81.93	17	36	127.073	86.35	18	37	117.398	83.53	16	34	100.447	79.12	16	38	84.6899	83.53	17	32	103.865
P07323	Gamma-enolase OS=Rattus norvegicus GN=Eno2 PE=1 SV=2 - [ENOG_RAT]	86.18	21	31	906	434	47.1109	5.16064	162.356	71.2	22	48	151.001	73.96	22	47	178.398	69.59	21	53	178.941	76.73	24	54	191.593	73.04	22	54	183.887	73.27	22	54	194.997	78.8	24	56	204.712	82.72	26	58	127.047	67.51	18	43	89.3354	61.98	19	36	136.244
P05065	Fructose-bisphosphate aldolase A OS=Rattus norvegicus GN=Aldoa PE=1 SV=2 - [ALDOA_RAT]	85.99	28	33	1243	364	39.3273	8.08936	186.2	75.82	23	61	203.787	75.82	23	66	242.486	81.32	26	77	243.204	79.4	26	75	241.801	81.59	25	73	275.408	79.4	25	86	231.802	73.9	25	70	269.508	84.07	30	81	150.05	79.95	23	64	123.541	80.77	25	54	146.754
P09117	Fructose-bisphosphate aldolase C OS=Rattus norvegicus GN=Aldoc PE=1 SV=3 - [ALDOC_RAT]	85.95	27	31	634	363	39.2592	7.12256	102.954	77.69	22	37	103.168	73.83	23	35	108.587	79.34	25	38	127.103	81.54	25	40	129.694	82.37	25	41	111.83	75.48	22	38	125.092	80.17	24	38	157.809	83.75	27	44	70.9046	79.06	23	31	54.4818	61.71	20	29	61.3798
P04797	Glyceraldehyde-3-phosphate dehydrogenase OS=Rattus norvegicus GN=Gapdh PE=1 SV=3 - [G3P_RAT]	85.89	3	25	1299	333	35.8052	8.03076	243.928	80.78	21	72	215.38	77.48	21	63	248.018	79.88	22	74	283.71	78.38	21	81	267.321	76.28	20	73	256.531	78.38	21	74	266.949	79.58	22	76	285.266	84.08	24	80	176.611	74.47	19	74	142.996	74.47	19	60	188.188
P02091	Hemoglobin subunit beta-1 OS=Rattus norvegicus GN=Hbb PE=1 SV=3 - [HBB1_RAT]	85.71	3	14	450	147	15.9692	8.07471	47.0821	78.23	10	17	55.2888	78.23	11	22	67.4353	78.23	11	23	109.239	85.71	14	35	65.8723	78.23	11	24	62.8564	78.23	11	24	114.447	85.71	14	36	80.5151	85.71	14	26	26.9384	76.19	9	15	30.9522	83.67	11	17	67.8794
O88767	Protein deglycase DJ-1 OS=Rattus norvegicus GN=Park7 PE=1 SV=1 - [PARK7_RAT]	85.71	14	14	365	189	19.9614	6.771	72.7531	73.54	11	19	66.5734	75.13	12	21	70.926	80.42	12	21	73.9503	68.78	10	21	76.0794	73.02	11	20	72.8661	73.02	11	21	76.3829	71.43	12	20	77.0459	82.01	13	22	54.846	75.13	12	19	49.1508	72.49	11	17	53.8451
P62260	14-3-3 protein epsilon OS=Rattus norvegicus GN=Ywhae PE=1 SV=1 - [1433E_RAT]	85.49	24	27	591	255	29.1554	4.7417	74.4449	69.8	20	30	81.9379	69.8	20	30	87.0084	71.76	19	33	98.3161	65.1	18	34	93.552	70.59	19	32	97.9626	74.9	21	37	105.277	77.65	23	36	111.78	85.49	24	39	69.7187	70.59	19	32	67.5706	69.41	19	33	81.0189
P22062	Protein-L-isoaspartate(D-aspartate) O-methyltransferase OS=Rattus norvegicus GN=Pcmt1 PE=1 SV=2 - [PIMT_RAT]	85.46	14	14	239	227	24.6257	7.6792	43.0607	57.27	9	14	43.2167	74.45	10	14	44.6626	79.3	11	14	48.4962	77.53	11	14	50.2942	74.45	10	16	40.1432	57.27	9	14	31.2952	48.9	8	10	54.1076	75.77	11	16	27.4194	53.74	9	11	20.399	49.78	7	9	29.1339
P42123	L-lactate dehydrogenase B chain OS=Rattus norvegicus GN=Ldhb PE=1 SV=2 - [LDHB_RAT]	85.33	24	27	537	334	36.5891	6.04932	70.7456	62.87	21	32	58.901	57.49	19	27	73.3057	62.87	21	30	82.7598	62.87	21	30	94.5176	78.74	23	34	81.233	66.77	22	33	91.0594	60.18	22	36	101.727	69.46	24	37	50.4778	58.08	19	26	36.4019	49.7	18	24	46.6442
P85108	Tubulin beta-2A chain OS=Rattus norvegicus GN=Tubb2a PE=1 SV=1 - [TBB2A_RAT]	84.72	3	37	2294	445	49.875	4.89404	331.483	80.22	28	116	332.294	80.22	27	122	377.721	80.22	29	129	373.284	80.22	26	121	357.85	80.22	29	121	395.059	80.22	29	129	405.032	80.45	28	128	476.791	82.92	33	142	289.065	81.57	29	131	250.703	81.57	30	124	263.975
Q3KRE8	Tubulin beta-2B chain OS=Rattus norvegicus GN=Tubb2b PE=1 SV=1 - [TBB2B_RAT]	84.72	2	37	2241	445	49.9209	4.89404	328.811	80.22	28	116	325.301	80.22	27	120	362.303	80.22	29	125	369.858	80.22	26	118	349.594	80.22	29	117	386.779	80.22	29	126	400.54	80.45	28	126	461.94	82.92	33	137	280.042	81.57	29	128	239.419	81.57	30	119	261.672
F8WFM2	Beta-soluble NSF attachment protein OS=Rattus norvegicus GN=Napb PE=4 SV=1 - [F8WFM2_RAT]	84.23	22	26	424	298	33.5355	5.46533	64.9151	57.72	13	19	85.1275	70.13	19	27	79.4298	70.81	17	25	87.7898	73.49	17	26	87.9798	75.84	18	25	74.0611	79.19	19	23	80.6686	72.48	17	22	96.3729	76.51	18	26	66.2435	67.79	18	25	63.5259	72.15	17	24	61.3039
P47942	Dihydropyrimidinase-related protein 2 OS=Rattus norvegicus GN=Dpysl2 PE=1 SV=1 - [DPYL2_RAT]	84.09	31	36	1356	572	62.2386	6.37939	225.814	76.92	29	64	252.173	76.92	29	77	237.051	74.65	29	70	255.236	77.1	29	69	257.705	77.1	30	76	279.262	72.55	28	83	262.85	76.92	31	74	315.439	76.92	31	90	177.493	78.32	30	71	184.08	81.12	30	75	189.952
B4F7C2	Protein Tubb4a OS=Rattus norvegicus GN=Tubb4a PE=2 SV=1 - [B4F7C2_RAT]	84.01	7	34	2064	444	49.5539	4.88135	313.036	83.11	29	109	307.632	80.41	27	112	341.942	83.11	31	117	347.078	80.41	27	112	327.761	83.11	30	109	336.6	83.11	30	112	378.247	77.03	28	124	441.91	84.01	32	131	251.318	83.11	28	114	219.778	80.86	27	106	245.531
P69897	Tubulin beta-5 chain OS=Rattus norvegicus GN=Tubb5 PE=1 SV=1 - [TBB5_RAT]	84.01	5	36	1977	444	49.639	4.89404	287.849	80.41	28	107	287.008	80.41	27	108	306.773	80.41	28	109	333.086	80.41	26	110	310.041	80.41	28	105	314.839	80.41	28	106	346.895	80.63	28	117	382.611	82.21	32	119	241.329	81.76	29	109	223.969	81.76	30	110	229.766
G3V7C6	RCG45400 OS=Rattus norvegicus GN=Tubb4b PE=3 SV=1 - [G3V7C6_RAT]	83.82	1	36	2118	445	49.799	4.89404	312.416	80.22	28	111	314.12	80.22	27	114	340.648	80.22	29	118	357.574	80.22	26	115	338.403	80.22	29	112	336.369	80.22	29	113	390.319	80.45	28	129	427.522	82.02	32	128	262.058	81.57	29	119	230.309	81.57	30	111	248.863
P07335	Creatine kinase B-type OS=Rattus norvegicus GN=Ckb PE=1 SV=2 - [KCRB_RAT]	83.73	24	26	1442	381	42.6983	5.66846	247.469	68.77	22	78	245.176	76.9	22	80	279.431	70.34	24	87	315.691	70.34	24	92	265.078	70.34	24	80	261.887	66.67	21	82	247.813	69.29	20	75	292.008	69.29	21	83	185.286	64.57	19	78	176.634	67.19	20	73	215.15
P04631	Protein S100-B OS=Rattus norvegicus GN=S100b PE=1 SV=2 - [S100B_RAT]	83.7	5	5	152	92	10.737	4.55127	21.4777	71.74	3	6	28.7288	71.74	3	9	33.7566	71.74	3	10	37.7745	79.35	4	10	27.2751	32.61	2	7	37.8374	83.7	4	8	36.2243	79.35	4	9	42.9722	83.7	4	10	26.6972	44.57	4	9	16.7288	40.22	3	6	28.4246
P11275	Calcium/calmodulin-dependent protein kinase type II subunit alpha OS=Rattus norvegicus GN=Camk2a PE=1 SV=1 - [KCC2A_RAT]	83.68	26	36	904	478	54.0805	7.07861	139.704	64.44	25	47	151.411	61.72	23	51	139.767	68.2	23	45	144.188	67.99	23	46	153.759	54.81	20	46	156.939	70.71	25	52	201.953	69.46	26	60	226.338	74.9	30	69	97.2149	54.18	20	43	91.7902	54.81	21	43	118.757
P63018	Heat shock cognate 71 kDa protein OS=Rattus norvegicus GN=Hspa8 PE=1 SV=1 - [HSP7C_RAT]	83.44	28	49	1205	646	70.8272	5.51611	180.974	55.11	34	59	165.008	54.8	31	58	191.582	63.47	35	65	220.68	63.31	36	71	204.64	59.29	35	65	190.591	67.65	34	64	230.153	71.67	42	78	236.431	78.33	41	77	146.442	56.35	34	65	107.895	52.32	31	56	149.335
P62870	Transcription elongation factor B polypeptide 2 OS=Rattus norvegicus GN=Tceb2 PE=1 SV=1 - [ELOB_RAT]	83.05	9	9	83	118	13.1616	5.0083	8.88662	44.92	5	6	10.3858	44.07	5	6	11.3224	38.14	5	6	5.08197	31.36	3	4	8.68302	55.93	4	5	7.20159	37.29	4	5	4.88707	31.36	2	3	5.76597	38.98	3	4	11.6986	52.54	5	6	6.68852	27.97	3	3	4.17551
P54921	Alpha-soluble NSF attachment protein OS=Rattus norvegicus GN=Napa PE=1 SV=2 - [SNAA_RAT]	83.05	18	22	387	295	33.1712	5.45264	72.0868	70.17	16	22	83.9448	74.58	17	25	79.5399	70.17	16	24	87.9462	74.58	18	26	84.5413	70.17	16	24	70.8897	71.19	16	21	75.3875	72.54	17	21	86.7722	70.85	16	23	54.2282	73.56	16	21	50.6604	67.46	16	21	45.0543
P25113	Phosphoglycerate mutase 1 OS=Rattus norvegicus GN=Pgam1 PE=1 SV=4 - [PGAM1_RAT]	82.68	16	22	517	254	28.8139	7.18115	68.3577	50	12	21	82.3465	62.99	14	29	91.219	66.93	16	31	72.7061	61.02	15	25	84.9418	62.99	15	25	98.1583	66.93	16	32	103.588	63.39	16	35	115.202	82.28	19	38	58.8511	54.33	13	26	47.1302	61.81	17	27	59.1418
G3V6D3	ATP synthase subunit beta OS=Rattus norvegicus GN=Atp5b PE=3 SV=1 - [G3V6D3_RAT]	82.23	31	31	1206	529	56.3095	5.2749	218.582	72.78	26	65	203.045	72.78	25	64	235.496	79.58	27	70	233.89	81.47	28	67	222.548	72.78	25	67	215.815	79.58	26	64	228.019	77.13	25	66	231.482	75.8	27	67	159.288	71.46	25	65	164.562	73.91	27	68	176.712
Q4QRB4	Tubulin beta-3 chain OS=Rattus norvegicus GN=Tubb3 PE=1 SV=1 - [TBB3_RAT]	82.22	16	34	1620	450	50.3862	4.93213	240.474	72.44	27	85	248.789	81.11	27	92	256.454	81.11	29	91	279.59	81.11	28	96	245.903	72.44	27	85	258.057	81.11	27	85	283.303	72.67	28	94	321.119	81.33	31	99	201.591	72.44	28	89	186.253	72.44	28	92	182.484
P37805	Transgelin-3 OS=Rattus norvegicus GN=Tagln3 PE=1 SV=2 - [TAGL3_RAT]	81.91	13	16	285	199	22.4862	7.32764	39.2706	62.31	11	15	32.4626	58.29	10	13	38.9652	66.83	12	15	46.7317	66.83	12	17	45.162	66.83	12	16	42.7405	66.83	12	17	48.6196	68.84	12	17	52.1869	76.88	15	20	28.8282	43.22	7	12	24.5088	57.29	10	14	27.0825
P07632	Superoxide dismutase [Cu-Zn] OS=Rattus norvegicus GN=Sod1 PE=1 SV=2 - [SODC_RAT]	81.82	9	9	174	154	15.9018	6.354	21.8468	61.04	5	10	26.9449	70.13	6	11	30.2346	71.43	6	11	28.3444	71.43	6	9	28.7737	68.83	6	10	29.4063	62.34	5	10	29.9849	75.32	7	9	42.045	66.23	6	13	11.1416	62.34	5	8	14.8515	75.32	7	10	14.8722
Q6AYZ1	Tubulin alpha-1C chain OS=Rattus norvegicus GN=Tuba1c PE=1 SV=1 - [TBA1C_RAT]	81.74	7	34	2554	449	49.9055	5.09717	436.21	79.29	28	128	463.898	79.73	28	145	490.246	79.73	29	147	515.859	79.73	29	151	535.042	79.73	30	148	521.002	79.51	29	147	523.153	80.4	31	144	541.491	81.74	32	152	415.076	80.18	32	147	324.718	79.73	31	125	356.202
P67779	Prohibitin OS=Rattus norvegicus GN=Phb PE=1 SV=1 - [PHB_RAT]	81.62	18	18	252	272	29.8019	5.75732	42.918	49.26	11	14	50.9962	58.09	12	16	39.8813	44.49	10	14	37.9514	37.5	7	10	47.4404	45.59	10	13	53.0835	62.13	13	17	42.9013	51.1	10	13	58.285	61.4	12	18	38.2926	55.51	12	15	33.0348	51.1	11	14	27.889
P50554	4-aminobutyrate aminotransferase, mitochondrial OS=Rattus norvegicus GN=Abat PE=1 SV=3 - [GABT_RAT]	81.6	33	33	674	500	56.4194	7.92822	118.458	66.6	25	38	112.779	65.8	25	38	111.383	64.4	22	36	134.746	71.4	27	41	128.159	67.4	24	39	123.573	64.4	23	37	130.054	64	24	38	151.509	75.8	27	43	85.8785	69.2	23	34	75.2915	66.6	25	34	83.6207
Q6PDU7	ATP synthase subunit g, mitochondrial OS=Rattus norvegicus GN=Atp5l PE=1 SV=2 - [ATP5L_RAT]	81.55	8	8	179	103	11.4261	9.5835	30.1062	46.6	6	10	24.9308	46.6	5	8	24.0421	46.6	5	8	32.6573	58.25	6	10	31.4974	46.6	5	9	31.8682	46.6	6	10	35.0328	46.6	5	10	40.0526	81.55	7	13	16.5742	46.6	5	9	15.3976	46.6	4	9	27.2666
P09951-2	Isoform IB of Synapsin-1 OS=Rattus norvegicus GN=Syn1 - [SYN1_RAT]	81.44	1	39	1129	668	69.8665	9.83252	199.474	70.96	34	62	228.309	77.99	37	69	232.271	78.44	38	69	265.312	73.8	37	76	242.972	72.01	35	66	234.484	70.96	34	67	205.109	72.6	34	60	208.156	68.86	30	60	112.778	66.77	30	50	120.069	73.8	35	61	119.362
Q05175	Brain acid soluble protein 1 OS=Rattus norvegicus GN=Basp1 PE=1 SV=2 - [BASP1_RAT]	81.36	20	20	524	220	21.7774	4.51318	89.9255	71.82	14	31	87.7519	68.18	13	28	82.1107	73.18	14	27	99.4215	73.18	14	28	99.7379	71.82	13	29	107.367	72.73	15	32	126.686	74.55	16	34	131.262	73.18	17	35	44.0589	63.64	13	22	51.3563	73.64	13	27	51.2644
P16617	Phosphoglycerate kinase 1 OS=Rattus norvegicus GN=Pgk1 PE=1 SV=2 - [PGK1_RAT]	81.06	22	37	825	417	44.51	7.89893	151.693	70.5	28	50	153.752	75.06	29	48	144.291	74.1	30	46	155.125	70.5	27	44	161.804	70.74	27	44	151.326	74.1	27	48	135.507	73.38	28	41	152.898	76.5	30	48	119.996	75.06	31	50	93.7347	71.46	29	44	104.25
P15999	ATP synthase subunit alpha, mitochondrial OS=Rattus norvegicus GN=Atp5a1 PE=1 SV=2 - [ATPA_RAT]	81.01	41	41	1083	553	59.7166	9.18799	172.192	54.43	27	54	172	64.56	31	61	179.759	61.48	31	62	205.864	62.21	33	67	183.638	58.77	29	58	179.734	56.96	27	60	204.237	58.59	31	65	226.293	76.13	35	72	149.723	53.16	27	58	129.15	53.89	26	56	145.753
P27139	Carbonic anhydrase 2 OS=Rattus norvegicus GN=Ca2 PE=1 SV=2 - [CAH2_RAT]	80.77	17	17	281	260	29.0956	7.40088	36.081	54.23	9	13	38.8587	73.08	11	17	37.7112	63.46	9	13	36.1629	65.77	10	14	39.5363	50.38	8	13	44.3555	51.54	9	15	43.6877	54.23	10	14	49.6225	54.23	10	15	31.9259	50.77	8	13	27.4933	58.08	12	19	40.4954
Q9JHU0	Dihydropyrimidinase-related protein 5 OS=Rattus norvegicus GN=Dpysl5 PE=1 SV=1 - [DPYL5_RAT]	80.32	36	36	505	564	61.5012	7.07861	86.2316	51.6	22	29	79.7695	54.08	23	31	80.9814	50.53	20	27	81.7099	50.71	21	27	86.0116	49.11	20	27	90.231	59.04	25	32	92.9442	56.03	23	33	98.7498	51.42	22	31	50.8474	43.44	18	23	41.5057	40.43	17	21	64.097
Q05982	Nucleoside diphosphate kinase A OS=Rattus norvegicus GN=Nme1 PE=1 SV=1 - [NDKA_RAT]	80.26	6	12	266	152	17.1818	6.32861	40.5841	80.26	11	16	41.8434	75.66	10	17	42.6241	75.66	10	17	50.4697	75.66	10	17	44.8563	80.26	11	17	36.3693	59.87	8	13	39.6173	75.66	10	15	50.173	69.08	10	18	13.5046	51.97	7	11	23.7937	59.87	8	13	20.5817
G3V8K2	Guanine nucleotide-binding protein subunit gamma OS=Rattus norvegicus GN=Gng3 PE=3 SV=1 - [G3V8K2_RAT]	80	4	4	70	75	8.29916	7.78174	9.71657	72	3	3	11.3064	72	3	4	15.2906	80	4	6	12.2278	80	4	5	13.3469	72	3	4	12.6017	80	4	5	9.91638	72	3	4	13.7167	72	3	4	6.90111	72	3	3	7.01053	72	3	3	3.85067
P08009	Glutathione S-transferase Yb-3 OS=Rattus norvegicus GN=Gstm3 PE=1 SV=2 - [GSTM4_RAT]	79.82	16	22	397	218	25.664	7.32764	65.5084	67.43	17	22	51.095	72.02	16	20	66.6716	69.72	16	23	66.3223	72.48	18	23	72.1142	63.3	15	24	74.2099	69.72	18	25	72.2072	71.56	15	22	80.7136	72.48	19	25	43.4799	71.56	17	21	47.8013	76.15	18	23	42.3028
P09527	Ras-related protein Rab-7a OS=Rattus norvegicus GN=Rab7a PE=1 SV=2 - [RAB7A_RAT]	79.71	15	15	202	207	23.4889	6.69775	32.5552	61.84	10	13	27.1526	56.52	9	11	33.0009	59.42	10	12	35.5631	51.69	8	11	45.8124	58.45	10	14	27.3544	52.66	8	10	17.6934	43.48	7	7	32.4648	57.97	9	11	20.9802	57.97	10	11	25.1817	45.89	7	10	23.9165
P04905	Glutathione S-transferase Mu 1 OS=Rattus norvegicus GN=Gstm1 PE=1 SV=2 - [GSTM1_RAT]	79.36	17	22	229	218	25.8971	8.19189	26.9865	39.45	9	10	20.4058	37.61	9	10	26.9485	43.58	10	12	26.41	49.08	10	11	36.2298	43.58	10	13	28.0692	33.49	8	10	38.0867	48.62	13	15	37.5172	48.17	14	15	18.8683	66.06	13	14	27.702	54.13	13	16	30.0963
P09606	Glutamine synthetase OS=Rattus norvegicus GN=Glul PE=1 SV=3 - [GLNA_RAT]	79.09	24	24	439	373	42.2403	7.07861	70.6523	64.34	18	25	70.322	50.94	17	25	73.6185	48.79	16	25	78.479	52.55	18	24	69.407	50.4	16	25	77.5634	57.91	17	26	75.6491	51.74	17	24	76.3645	54.42	19	27	43.5257	48.53	17	23	38.9948	47.18	15	21	53.5695
B2RYW9	Fumarylacetoacetate hydrolase domain-containing protein 2 OS=Rattus norvegicus GN=Fahd2 PE=1 SV=1 - [FAHD2_RAT]	78.91	17	17	187	313	34.5591	8.35303	26.16	39.62	7	8	17.6418	24.28	6	6	29.5148	48.88	9	10	33.5709	38.66	9	11	33.938	37.38	9	11	43.065	60.7	10	11	40.3369	53.04	10	12	31.9421	40.89	9	9	36.0062	60.06	14	14	34.5361	55.27	12	15	33.7689
P63086	Mitogen-activated protein kinase 1 OS=Rattus norvegicus GN=Mapk1 PE=1 SV=3 - [MK01_RAT]	78.77	18	24	467	358	41.2492	6.97607	78.2232	55.03	16	24	76.9565	62.57	17	26	80.2393	63.97	18	27	80.7464	55.31	16	25	94.9307	64.25	18	31	97.7847	61.45	17	31	88.819	52.51	13	25	99.347	63.41	18	32	57.344	63.69	17	26	40.3063	54.47	15	24	52.2534
P07936	Neuromodulin OS=Rattus norvegicus GN=Gap43 PE=1 SV=1 - [NEUM_RAT]	78.76	18	19	379	226	23.5893	4.70361	62.4005	64.6	12	22	56.3528	59.29	12	20	47.1997	64.6	12	19	56.6665	64.6	12	18	66.5209	64.6	13	23	64.0583	64.6	11	22	88.1688	66.37	14	28	72.7431	71.24	14	23	21.4099	64.6	12	17	25.7174	62.39	12	18	43.414
P62959	Histidine triad nucleotide-binding protein 1 OS=Rattus norvegicus GN=Hint1 PE=1 SV=5 - [HINT1_RAT]	78.57	8	8	229	126	13.7681	6.87354	51.6062	78.57	7	12	57.9884	78.57	8	15	60.9454	78.57	8	15	45.9402	67.46	5	11	56.8567	73.02	6	12	51.0109	67.46	7	13	50.851	72.22	5	11	66.6836	65.87	5	13	45.3781	71.43	6	14	29.2123	77.78	6	12	33.6655
Q63362	NADH dehydrogenase [ubiquinone] 1 alpha subcomplex subunit 5 OS=Rattus norvegicus GN=Ndufa5 PE=1 SV=3 - [NDUA5_RAT]	78.45	9	10	163	116	13.4033	7.43018	30.4465	77.59	8	9	16.3421	59.48	6	6	31.2974	74.14	8	10	30.3918	77.59	8	9	41.8387	78.45	9	12	28.7339	78.45	8	9	44.4508	78.45	9	13	31.1044	77.59	7	9	21.7202	58.62	6	8	20.4726	56.9	6	7	22.7397
P62815	V-type proton ATPase subunit B, brain isoform OS=Rattus norvegicus GN=Atp6v1b2 PE=1 SV=1 - [VATB2_RAT]	78.28	31	31	690	511	56.5149	5.80811	106.408	47.95	19	34	116.666	63.21	22	38	133.359	55.58	22	41	137.665	52.05	21	42	120.183	56.16	21	38	128.33	53.62	22	41	121.601	56.95	23	37	122.835	48.34	20	38	90.4816	68.1	24	39	82.2599	59.3	24	39	80.4476
P01946	Hemoglobin subunit alpha-1/2 OS=Rattus norvegicus GN=Hba1 PE=1 SV=3 - [HBA_RAT]	78.17	7	9	384	142	15.3188	7.97217	44.636	76.76	7	12	74.0532	78.17	9	23	62.4001	78.17	8	19	112.226	78.17	9	29	68.4065	78.17	8	19	65.7317	78.17	8	18	98.6417	78.17	9	29	70.9685	78.17	8	20	35.4214	78.17	8	17	33.0644	76.76	7	17	61.6761
P31044	Phosphatidylethanolamine-binding protein 1 OS=Rattus norvegicus GN=Pebp1 PE=1 SV=3 - [PEBP1_RAT]	78.07	16	16	414	187	20.7884	5.79541	71.6519	62.03	11	22	74.2897	62.03	11	23	79.3376	62.03	12	24	82.5907	62.03	11	23	78.7693	62.03	11	23	63.3676	55.08	10	21	71.198	62.03	10	21	93.0801	77.54	13	29	42.3947	62.03	10	23	44.1084	62.03	11	22	42.4156
P02770	Serum albumin OS=Rattus norvegicus GN=Alb PE=1 SV=2 - [ALBU_RAT]	77.96	45	47	853	608	68.6861	6.48096	70.9077	42.6	21	29	104.434	54.11	31	45	198.224	76.32	43	71	185.185	69.24	40	66	141.882	57.4	32	49	85.1586	48.52	22	34	213.433	72.86	44	73	136.234	59.05	34	54	49.3712	45.23	21	24	44.0031	47.86	23	27	163.943
P61765	Syntaxin-binding protein 1 OS=Rattus norvegicus GN=Stxbp1 PE=1 SV=1 - [STXB1_RAT]	77.61	4	50	877	594	67.5259	6.96143	119.201	55.56	29	44	129.094	65.15	33	49	158.426	52.69	27	51	162.814	60.44	33	53	132.427	57.91	29	46	142.123	58.75	30	52	175.243	62.29	35	52	190.982	63.47	38	58	112.609	59.43	33	50	101.818	54.88	31	48	106.176
P61983	14-3-3 protein gamma OS=Rattus norvegicus GN=Ywhag PE=1 SV=2 - [1433G_RAT]	77.33	11	19	415	247	28.2849	4.89404	52.0236	66.4	12	19	59.2903	65.99	12	21	68.3665	58.3	12	23	68.1059	66.4	12	23	77.4669	66.4	13	25	72.2532	63.16	13	24	68.2862	66.4	13	23	85.307	61.94	14	28	55.7746	58.3	12	21	44.4958	63.97	13	22	50.9709
P50408	V-type proton ATPase subunit F OS=Rattus norvegicus GN=Atp6v1f PE=1 SV=1 - [VATF_RAT]	77.31	8	8	71	119	13.362	5.8208	10.1603	36.13	4	4	10.5386	36.13	5	5	10.6719	42.86	4	4	10.7675	35.29	4	4	9.67923	28.57	4	4	7.70671	26.05	3	3	6.13518	32.77	4	4	12.0283	42.86	5	6	4.06219	16.81	2	2	7.75301	56.3	6	6	4.20417
P62738	Actin, aortic smooth muscle OS=Rattus norvegicus GN=Acta2 PE=2 SV=1 - [ACTA_RAT]	77.19	2	28	776	377	41.9818	5.38916	91.7739	45.36	18	42	95.4057	45.36	18	44	98.3234	45.36	17	42	108.102	45.36	18	46	101.907	45.36	17	43	84.7522	51.46	18	40	131.748	70.82	24	54	112.382	46.68	21	52	71.4825	42.44	16	41	50.7708	37.67	15	38	59.9889
P31399	ATP synthase subunit d, mitochondrial OS=Rattus norvegicus GN=Atp5h PE=1 SV=3 - [ATP5H_RAT]	77.02	13	13	304	161	18.7516	6.59521	47.4776	75.78	10	20	45.682	75.78	10	20	43.2039	75.78	9	18	52.1109	75.78	11	20	44.2116	75.78	9	16	54.7245	71.43	10	20	57.5662	77.02	11	22	52.4406	72.67	10	20	28.7687	75.78	9	15	21.9298	75.78	11	16	24.0394
P16446	Phosphatidylinositol transfer protein alpha isoform OS=Rattus norvegicus GN=Pitpna PE=1 SV=2 - [PIPNA_RAT]	76.75	21	24	248	271	31.8871	6.3667	20.0924	49.45	11	13	21.5684	38.75	10	13	31.4368	49.82	13	15	20.8216	34.69	9	12	32.9116	50.18	12	15	24.0805	39.11	10	13	30.9373	49.45	14	16	29.8583	37.64	11	13	15.9824	51.66	12	16	21.1975	52.4	12	14	15.3491
Q9Z2L0	Voltage-dependent anion-selective channel protein 1 OS=Rattus norvegicus GN=Vdac1 PE=1 SV=4 - [VDAC1_RAT]	76.68	9	19	480	283	30.7366	8.54346	100.122	63.96	13	30	88.9489	63.96	13	28	77.7108	63.96	14	27	82.091	63.96	14	25	98.5003	63.96	14	29	93.6031	63.96	12	29	118.709	63.96	13	36	112.235	65.02	15	33	63.2228	61.84	12	24	43.0787	59.72	13	19	49.0147
P09951	Synapsin-1 OS=Rattus norvegicus GN=Syn1 PE=1 SV=3 - [SYN1_RAT]	76.56	1	39	1165	704	73.9426	9.80322	211.901	71.02	35	65	232.349	73.3	37	71	241.289	73.72	38	71	277.252	73.72	38	79	248.257	67.61	35	68	242.51	71.02	35	69	214.186	72.59	35	62	215.177	69.03	31	62	118.964	67.05	31	52	124.631	73.72	36	63	121.618
P13233	2',3'-cyclic-nucleotide 3'-phosphodiesterase OS=Rattus norvegicus GN=Cnp PE=1 SV=2 - [CN37_RAT]	76.19	33	34	709	420	47.2386	8.89502	99.4329	61.67	25	35	97.4138	69.52	28	39	110.492	59.29	24	35	100.413	67.14	28	36	120.017	66.9	29	43	113.288	65.71	26	36	105.996	60.71	25	38	108.297	64.52	26	38	90.6717	60.95	28	41	88.9595	67.14	31	44	91.5258
Q63560	Microtubule-associated protein 6 OS=Rattus norvegicus GN=Map6 PE=1 SV=1 - [MAP6_RAT]	76.16	54	54	718	952	100.423	9.43701	120.194	49.89	30	44	97.7738	45.48	27	39	112.75	49.58	29	40	136.673	55.46	34	47	135.642	52.73	33	43	134.768	52.73	30	43	115.194	47.58	26	37	114.06	51.68	27	37	40.8046	36.45	23	35	63.9928	49.79	27	37	56.902
P63039	60 kDa heat shock protein, mitochondrial OS=Rattus norvegicus GN=Hspd1 PE=1 SV=1 - [CH60_RAT]	76.09	26	43	884	573	60.9174	6.17627	166.815	62.83	31	52	166.592	59.86	31	50	154.492	58.64	32	46	173.193	64.05	33	48	211.13	69.46	36	62	185.443	68.06	34	56	201.137	62.3	32	57	214.161	65.79	34	60	116.339	45.38	24	37	91.4823	58.46	29	39	110.693
Q62950	Dihydropyrimidinase-related protein 1 OS=Rattus norvegicus GN=Crmp1 PE=1 SV=1 - [DPYL1_RAT]	75.87	30	34	794	572	62.1566	7.12256	156.781	68.01	25	42	148.408	63.81	25	44	170.885	68.71	25	47	143.319	62.24	23	38	156.581	64.86	24	42	144.298	69.93	26	43	180.187	70.63	28	50	189.501	69.41	29	53	117.502	70.1	25	40	104.999	64.16	25	43	109.461
M0R5J4	Uncharacterized protein OS=Rattus norvegicus PE=3 SV=1 - [M0R5J4_RAT]	75.58	8	33	1042	434	47.0452	6.3667	170.152	65.44	25	57	162.428	62.44	23	56	213.79	60.6	22	70	174.757	62.44	23	58	193.346	60.83	22	58	216.926	59.45	21	66	203.028	70.51	27	62	227.195	67.05	26	64	115.967	55.53	20	48	120.45	66.59	25	48	137.241
P11980	Pyruvate kinase PKM OS=Rattus norvegicus GN=Pkm PE=1 SV=3 - [KPYM_RAT]	75.52	4	42	1196	531	57.7809	7.06396	211.122	71.37	38	67	202.664	71.37	35	65	203.806	65.35	33	64	226.987	70.06	36	69	220.521	69.49	34	66	222.16	68.36	35	71	228.764	70.24	34	67	252.429	69.87	37	75	185.223	68.55	33	64	148.465	67.98	33	59	169.513
P11517	Hemoglobin subunit beta-2 OS=Rattus norvegicus PE=1 SV=2 - [HBB2_RAT]	75.51	2	13	401	147	15.9723	8.79248	38.6335	62.59	9	15	46.5334	74.15	11	20	58.5238	74.15	11	21	100.177	75.51	13	32	54.2227	74.15	11	22	52.1221	74.15	11	22	105.123	75.51	13	34	74.9057	75.51	13	25	20.4788	54.42	7	12	20.7598	67.35	9	15	51.9565
F1LQ05	Endophilin-A1 (Fragment) OS=Rattus norvegicus GN=Sh3gl2 PE=4 SV=1 - [F1LQ05_RAT]	75.44	18	24	397	338	38.3472	5.13525	49.3583	55.33	16	22	58.0003	54.73	15	22	55.2114	57.99	17	24	72.1771	65.38	16	26	58.6318	41.72	13	19	74.5762	59.76	16	25	71.7405	59.76	17	25	80.6109	72.49	18	26	35.0491	45.56	15	19	33.6628	41.72	14	19	34.6155
P62775	Myotrophin OS=Rattus norvegicus GN=Mtpn PE=1 SV=2 - [MTPN_RAT]	75.42	9	9	105	118	12.8526	5.51611	17.207	49.15	4	5	23.2159	49.15	4	7	25.5611	49.15	4	6	28.0188	49.15	4	6	33.8756	49.15	4	7	24.2933	51.69	5	6	24.1845	55.08	5	6	23.9527	55.08	4	6	18.3135	55.08	6	7	9.03227	38.14	2	4	8.0466
P45592	Cofilin-1 OS=Rattus norvegicus GN=Cfl1 PE=1 SV=3 - [COF1_RAT]	75.3	13	19	573	166	18.5207	8.08936	92.2133	64.46	14	32	89.9599	71.08	14	31	94.4931	71.08	15	33	117.868	71.08	15	38	107.253	71.08	15	31	100.098	67.47	14	31	100.6	67.47	14	32	120.906	67.47	15	34	68.7003	71.08	16	28	60.5846	71.69	13	27	79.3645
Q09073	ADP/ATP translocase 2 OS=Rattus norvegicus GN=Slc25a5 PE=1 SV=3 - [ADT2_RAT]	75.17	10	23	575	298	32.8801	9.72998	70.5444	56.71	16	29	69.8766	51.68	15	32	65.2543	54.36	16	27	75.6323	64.09	17	29	72.7591	64.09	17	31	73.765	62.42	17	33	93.9728	55.37	18	37	111.561	57.38	19	45	56.9555	60.4	16	29	51.0062	53.02	16	28	64.3363
O35244	Peroxiredoxin-6 OS=Rattus norvegicus GN=Prdx6 PE=1 SV=3 - [PRDX6_RAT]	75	19	19	340	224	24.803	5.93506	45.0375	66.52	14	17	58.6055	66.52	15	20	46.2717	63.39	13	17	51.0184	55.8	12	18	59.3042	66.52	13	21	49.5323	58.93	13	18	62.5681	64.29	15	21	62.1319	74.11	14	21	46.7548	62.05	12	17	33.5961	74.11	14	19	44.5946
D4ADS4	Protein Mgst3 OS=Rattus norvegicus GN=Mgst3 PE=4 SV=1 - [D4ADS4_RAT]	75	8	8	173	152	16.7216	9.49561	48.6477	75	6	12	39.4414	75	7	10	49.2267	75	6	11	34.7769	75	6	7	35.2578	50	4	7	26.3835	34.21	4	7	28.8964	34.21	5	8	26.4476	57.89	5	8	21.0131	74.34	6	9	8.59089	34.21	4	5	34.4498
P11980-2	Isoform M2 of Pyruvate kinase PKM OS=Rattus norvegicus GN=Pkm - [KPYM_RAT]	74.95	4	42	1120	531	57.744	7.44482	207.717	68.74	37	63	200.48	68.74	34	62	198.52	62.71	32	60	221.89	67.42	34	65	214.683	66.85	33	63	218.451	67.8	35	69	209.441	63.47	31	60	228.548	63.09	34	68	173.129	67.98	33	61	139.317	65.35	32	55	145.446
P63102	14-3-3 protein zeta/delta OS=Rattus norvegicus GN=Ywhaz PE=1 SV=1 - [1433Z_RAT]	74.69	16	24	534	245	27.7537	4.79248	63.7745	51.43	12	23	71.1721	59.59	16	30	77.6373	57.14	15	28	70.4376	54.29	15	28	76.1059	57.14	14	29	91.0165	65.31	16	32	90.9598	65.71	18	32	103.972	65.31	17	33	55.3004	53.06	14	26	68.2243	61.63	18	35	71.8525
P61765-2	Isoform 2 of Syntaxin-binding protein 1 OS=Rattus norvegicus GN=Stxbp1 - [STXB1_RAT]	74.63	2	48	868	603	68.6922	6.771	118.826	53.57	28	43	125.972	62.35	32	48	158.288	52.9	28	52	160.18	59.37	33	53	127.717	55.89	28	44	137.826	56.72	28	50	172.112	61.19	35	52	187.855	61.36	37	57	99.4092	58.37	32	48	97.5785	55.06	32	49	101.189
P84076	Neuron-specific calcium-binding protein hippocalcin OS=Rattus norvegicus GN=Hpca PE=1 SV=2 - [HPCA_RAT]	74.61	7	17	307	193	22.413	4.97021	47.6232	55.44	12	19	47.4783	55.96	13	19	44.3046	55.44	12	18	46.7619	58.03	12	17	47.0306	62.18	13	19	53.3803	58.55	13	18	52.1837	62.18	13	18	48.1685	52.33	11	18	27.2451	46.11	10	16	23.1879	49.22	10	13	29.0096
Q7TQ16	Cytochrome b-c1 complex subunit 8 OS=Rattus norvegicus GN=Uqcrq PE=3 SV=1 - [QCR8_RAT]	74.39	6	6	102	82	9.84321	10.521	7.12774	34.15	3	3	3.02808	34.15	3	4	4.98963	34.15	3	4	9.383	42.68	4	5	6.47872	42.68	4	5	2.07333	26.83	3	4	13.1037	65.85	5	9	20.9129	74.39	6	9	6.22434	34.15	3	5	6.8568	42.68	4	7	9.06744
Q9JKB7	Guanine deaminase OS=Rattus norvegicus GN=Gda PE=2 SV=1 - [Q9JKB7_RAT]	74.23	31	31	527	454	50.8687	5.71924	78.7856	57.71	20	27	76.8828	64.76	23	29	88.2389	65.2	23	32	90.4039	50.44	18	29	85.0061	60.13	21	29	74.4641	62.33	22	31	65.0874	56.17	22	29	83.1127	59.03	20	30	71.3062	60.79	21	31	64.4965	72.03	26	31	58.2819
P16086	Spectrin alpha chain, non-erythrocytic 1 OS=Rattus norvegicus GN=Sptan1 PE=1 SV=2 - [SPTN1_RAT]	74.15	199	199	3667	2472	284.462	5.32568	642.347	61.53	144	213	608.251	59.91	135	204	602.993	59.79	138	204	697.017	60.44	143	215	717.099	60.56	143	215	625.069	58.62	133	200	601.123	60.52	139	192	699.451	61.89	144	213	459.516	62.1	139	196	403.999	58.94	137	197	450.926
P00507	Aspartate aminotransferase, mitochondrial OS=Rattus norvegicus GN=Got2 PE=1 SV=2 - [AATM_RAT]	73.95	32	32	704	430	47.2841	8.99756	129.555	63.02	22	43	119.064	61.16	22	40	74.5066	53.72	18	26	122.809	61.16	24	42	115.109	59.07	24	39	115.074	62.56	24	41	120.027	61.16	20	39	124.209	62.56	22	38	93.148	67.21	23	40	86.8824	64.65	23	41	72.0875
Q6PEC4	S-phase kinase-associated protein 1 OS=Rattus norvegicus GN=Skp1 PE=2 SV=3 - [SKP1_RAT]	73.62	11	11	115	163	18.6603	4.53857	12.4001	49.08	5	6	13.5757	44.79	4	5	20.0004	56.44	7	8	16.7712	63.19	6	6	15.0783	51.53	5	5	18.8626	56.44	7	8	16.7659	52.15	5	6	19.4836	45.4	5	7	5.26062	31.9	4	5	8.03604	56.44	6	7	10.9432
P62963	Profilin-1 OS=Rattus norvegicus GN=Pfn1 PE=1 SV=2 - [PROF1_RAT]	73.57	10	10	186	140	14.9475	8.27979	27.1466	71.43	8	11	24.0859	71.43	8	12	22.2336	71.43	8	11	28.2159	71.43	8	11	35.321	71.43	8	13	28.6525	71.43	8	10	25.0716	71.43	8	10	26.0617	60.71	8	9	16.9934	62.86	7	9	17.6953	71.43	8	10	16.3184
Q9Z1P2	Alpha-actinin-1 OS=Rattus norvegicus GN=Actn1 PE=1 SV=1 - [ACTN1_RAT]	73.54	32	55	731	892	102.896	5.37646	88.3776	45.4	31	33	89.2349	50.9	35	39	107.95	49.44	34	40	99.561	42.49	31	36	118.706	47.87	37	43	98.7215	44.06	31	40	102.224	36.43	26	36	98.4504	44.84	30	38	99.1436	49.78	37	44	88.1832	47.98	36	46	88.3044
P63100	Calcineurin subunit B type 1 OS=Rattus norvegicus GN=Ppp3r1 PE=1 SV=2 - [CANB1_RAT]	73.53	12	12	298	170	19.2876	4.80518	49.994	73.53	11	19	40.1695	62.94	8	15	45.6361	73.53	11	18	42.4028	73.53	10	16	52.3667	65.29	9	18	48.0093	53.53	8	16	42.2659	64.12	9	15	48.8996	64.12	10	16	34.3319	73.53	10	21	22.7661	51.76	7	13	22.9481
P68255	14-3-3 protein theta OS=Rattus norvegicus GN=Ywhaq PE=1 SV=1 - [1433T_RAT]	73.47	13	20	369	245	27.7608	4.77979	57.4415	49.39	13	20	59.9119	49.39	14	22	59.5154	55.1	15	21	66.9941	50.2	15	22	57.5926	50.2	14	21	66.0265	46.94	13	24	64.035	50.2	14	21	62.0563	62.45	14	23	35.8263	43.27	13	19	35.1062	59.59	14	20	26.5104
Q62669	Protein Hbb-b1 OS=Rattus norvegicus GN=Hbb-b1 PE=3 SV=1 - [Q62669_RAT]	73.47	7	10	202	147	16.0123	8.19189	12.711	48.3	5	6	26.7599	48.3	5	10	36.4852	67.35	7	12	43.9485	73.47	9	16	31.3996	67.35	7	12	19.2684	56.46	6	9	48.7162	61.22	8	16	34.3165	42.86	5	10	15.6928	56.46	6	8	18.407	51.7	6	8	22.0732
F1LP82	Ras-related protein Rab-2A (Fragment) OS=Rattus norvegicus GN=Rab2a PE=3 SV=2 - [F1LP82_RAT]	73.47	8	14	254	196	21.6828	6.53662	41.5339	55.61	10	14	37.1361	55.61	10	13	43.6925	63.78	11	14	48.827	57.14	10	15	45.9342	51.02	10	16	45.9567	57.65	10	14	40.6039	49.49	9	13	63.9634	65.31	12	20	32.5889	58.16	10	13	37.9076	52.04	10	15	31.1731
P63319	Protein kinase C gamma type OS=Rattus norvegicus GN=Prkcg PE=1 SV=1 - [KPCG_RAT]	73.46	41	44	604	697	78.3071	7.45947	73.122	47.49	26	30	86.5463	53.37	29	33	78.4322	55.38	27	31	86.7582	52.51	27	31	101.315	50.36	29	35	96.0844	54.95	30	37	106.033	55.38	31	38	93.3685	55.67	29	34	71.8591	49.07	29	36	64.2105	51.51	31	41	53.7408
P60881	Synaptosomal-associated protein 25 OS=Rattus norvegicus GN=Snap25 PE=1 SV=1 - [SNP25_RAT]	73.3	5	18	350	206	23.3002	4.76709	55.9725	69.42	16	23	59.7152	69.42	16	23	50.8511	66.02	15	20	58.5141	60.68	13	19	60.3128	65.53	14	20	60.0483	57.77	13	20	60.2593	68.45	16	20	73.1038	69.9	17	24	40.6627	57.28	12	16	35.8109	61.17	13	18	37.3705
D3ZEN5	Peroxiredoxin-5, mitochondrial (Fragment) OS=Rattus norvegicus GN=Prdx5 PE=4 SV=2 - [D3ZEN5_RAT]	73.29	11	11	193	161	16.9149	7.23975	29.6591	54.04	8	10	34.7217	54.66	9	11	28.0173	54.04	8	9	34.8308	43.48	8	11	31.437	43.48	8	11	30.824	46.58	7	10	32.5223	54.66	8	11	39.121	54.66	9	12	25.2204	43.48	7	10	18.7467	40.99	6	8	21.6915
P47819	Glial fibrillary acidic protein OS=Rattus norvegicus GN=Gfap PE=1 SV=2 - [GFAP_RAT]	73.02	32	34	615	430	49.9266	5.43994	91.4586	59.77	25	33	101.339	60.7	22	34	107.82	65.35	28	39	101.049	60.7	25	35	101.351	60.93	26	36	81.4548	54.88	22	31	108.048	65.35	27	40	108.113	61.63	25	37	60.4642	55.35	19	26	55.2696	56.28	22	26	70.2848
P50399	Rab GDP dissociation inhibitor beta OS=Rattus norvegicus GN=Gdi2 PE=1 SV=2 - [GDIB_RAT]	72.81	25	32	523	445	50.5047	6.25244	108.859	61.8	23	32	99.7429	62.02	23	31	107.672	69.89	26	32	108.788	68.31	23	31	101.401	60	23	29	111.773	59.78	23	33	98.9629	56.85	18	26	125.831	66.29	23	34	59.2723	57.3	19	24	55.7807	52.36	21	25	66.2136
P21575	Dynamin-1 OS=Rattus norvegicus GN=Dnm1 PE=1 SV=2 - [DYN1_RAT]	72.8	2	66	1308	864	97.2339	6.87354	192.746	59.72	43	72	170.171	65.86	52	71	183.682	62.27	48	70	200.91	61	48	74	193.311	64	50	75	215.144	63.66	49	81	210.025	60.3	47	74	220.979	61.11	49	74	143.981	63.77	51	71	148.602	61.81	50	76	139.159
P35704	Peroxiredoxin-2 OS=Rattus norvegicus GN=Prdx2 PE=1 SV=3 - [PRDX2_RAT]	72.73	10	10	269	198	21.7701	5.59229	53.4303	53.54	8	13	62.1236	53.54	8	16	65.1847	72.73	10	18	60.1526	53.54	8	14	66.1694	53.54	8	14	71.6993	72.73	10	18	65.7655	68.69	9	16	49.4792	72.73	10	13	44.8316	53.54	8	14	35.9016	57.58	9	14	44.02
F1M779	Clathrin heavy chain OS=Rattus norvegicus GN=Cltc PE=3 SV=1 - [F1M779_RAT]	72.72	1	103	1935	1675	191.438	5.69385	359.148	53.19	76	111	318.6	54.63	74	105	348.741	60.6	79	112	369.791	52.84	76	112	402.647	62.15	82	118	398.652	60.96	80	122	380.378	57.61	77	111	405.983	60.42	81	115	259.337	54.03	71	105	194.503	47.7	63	89	243.3
P62749	Hippocalcin-like protein 1 OS=Rattus norvegicus GN=Hpcal1 PE=1 SV=2 - [HPCL1_RAT]	72.54	5	14	180	193	22.324	5.50342	15.3541	48.19	9	11	23.5973	47.67	10	12	24.528	52.33	10	12	18.6761	43.52	8	9	21.6938	59.07	11	11	26.897	52.33	10	11	29.8945	52.85	10	12	30.4399	38.86	8	13	12.7549	31.09	7	9	4.26137	26.94	5	5	9.37019
G3V9G3	Calcium/calmodulin-dependent protein kinase II, beta, isoform CRA_a OS=Rattus norvegicus GN=Camk2b PE=4 SV=1 - [G3V9G3_RAT]	72.32	3	30	864	542	60.4227	7.28369	148.358	58.49	24	49	154.66	63.1	25	51	157.044	66.05	24	48	148.841	59.96	22	46	177.019	54.61	23	51	164.27	60.15	24	49	185.426	63.47	24	54	184.027	64.02	24	51	91.7124	56.83	22	40	88.7846	55.17	21	41	112.749
P59215	Guanine nucleotide-binding protein G(o) subunit alpha OS=Rattus norvegicus GN=Gnao1 PE=1 SV=2 - [GNAO_RAT]	72.32	7	21	462	354	40.0429	5.52881	81.7662	65.82	17	26	73.4831	58.47	17	25	72.0497	62.43	17	27	83.3156	59.04	16	26	85.6206	62.99	19	28	71.1671	56.78	15	24	77.1811	55.37	15	24	85.5958	60.73	18	29	47.8153	53.11	14	24	42.0953	48.02	14	19	53.0963
P84083	ADP-ribosylation factor 5 OS=Rattus norvegicus GN=Arf5 PE=1 SV=2 - [ARF5_RAT]	72.22	5	14	300	180	20.5166	6.78564	44.6354	68.89	12	16	51.3158	61.11	11	16	50.4127	72.22	13	16	64.6458	68.89	12	19	58.4812	61.11	12	18	45.4106	60	11	15	52.4941	61.11	11	16	59.2816	61.11	11	18	46.0502	67.78	12	19	38.1911	51.67	9	16	39.2173
Q63537	Synapsin-2 OS=Rattus norvegicus GN=Syn2 PE=1 SV=1 - [SYN2_RAT]	72.18	27	29	691	586	63.4168	8.57275	134.734	53.58	20	39	131.517	52.22	20	37	144.282	57.68	22	40	135.202	54.27	22	37	149.694	57.34	23	40	156.929	57.34	22	42	153.109	56.48	21	41	158.275	60.58	23	43	104.627	46.76	17	38	76.1035	41.81	17	32	85.0211
P39069	Adenylate kinase isoenzyme 1 OS=Rattus norvegicus GN=Ak1 PE=1 SV=3 - [KAD1_RAT]	72.16	14	14	227	194	21.5702	7.89893	38.0749	45.88	10	14	23.5027	45.36	8	11	37.8178	48.97	11	15	33.9888	48.97	11	14	43.5779	57.73	9	14	23.8158	45.36	7	9	26.865	42.27	7	9	27.0845	44.85	7	10	22.2987	59.28	10	13	16.6172	44.85	9	11	21.3061
P21575-4	Isoform 4 of Dynamin-1 OS=Rattus norvegicus GN=Dnm1 - [DYN1_RAT]	72.08	0	65	1286	856	96.2094	6.87354	188.331	58.18	42	70	165.709	63.43	50	69	181.112	60.75	47	69	198.07	59.46	47	73	192.776	64.14	50	75	212.342	63.79	49	80	205.45	59.46	46	72	216.083	58.64	47	72	139.983	61.33	49	68	147.928	61.92	50	76	137.12
P11442	Clathrin heavy chain 1 OS=Rattus norvegicus GN=Cltc PE=1 SV=3 - [CLH1_RAT]	72.06	1	103	1967	1675	191.477	5.71924	364.922	53.25	77	113	321.991	54.69	75	106	355.123	60.66	80	114	377.22	53.91	77	114	409.085	61.49	82	119	404.99	61.01	81	124	386.5	57.67	78	113	413.081	61.49	82	117	264.019	54.09	72	107	197.286	47.76	64	91	248.515
Q8VBU2-2	Isoform 2 of Protein NDRG2 OS=Rattus norvegicus GN=Ndrg2 - [NDRG2_RAT]	71.99	2	17	324	357	39.2453	5.49072	66.2812	61.9	11	18	59.2145	51.26	10	16	58.9207	45.66	9	15	76.2872	54.9	12	19	70.6976	48.74	10	17	75.687	55.46	12	21	87.4399	61.62	15	23	93.1242	59.1	14	23	50.0413	49.3	11	16	31.0114	57.42	12	16	41.8919
P13221	Aspartate aminotransferase, cytoplasmic OS=Rattus norvegicus GN=Got1 PE=1 SV=3 - [AATC_RAT]	71.91	27	28	445	413	46.3995	7.21045	66.5792	55.69	19	27	59.3761	52.3	16	22	54.7372	48.43	17	22	59.7892	58.35	20	24	73.1318	62.47	21	27	66.3921	53.03	18	24	58.9012	49.88	18	24	88.1011	62.47	23	31	36.7529	47.7	18	24	45.9144	49.15	17	22	42.6812
Q9Z339	Glutathione S-transferase omega-1 OS=Rattus norvegicus GN=Gsto1 PE=1 SV=2 - [GSTO1_RAT]	71.78	13	13	158	241	27.651	6.68311	16.1302	25.73	6	7	15.878	34.85	6	7	16.7215	35.68	8	9	28.0266	41.49	9	10	22.8271	46.47	8	9	16.7049	35.27	7	7	21.0307	34.44	7	8	27.9629	47.72	10	12	18.0272	48.55	8	9	9.33308	25.31	5	6	15.1389
P21575-2	Isoform 2 of Dynamin-1 OS=Rattus norvegicus GN=Dnm1 - [DYN1_RAT]	71.68	1	65	1292	851	95.8672	6.75635	190.068	59.34	43	71	167.367	64.63	51	70	182.799	61.93	48	70	199.774	60.63	48	74	190.441	63.69	50	75	212.268	63.34	49	80	207.099	58.99	46	72	216.083	58.99	47	72	141.611	62.51	50	69	147.754	61.46	50	76	137.12
Q9ER34	Aconitate hydratase, mitochondrial OS=Rattus norvegicus GN=Aco2 PE=1 SV=2 - [ACON_RAT]	71.67	47	47	946	780	85.38	7.82568	137.741	53.46	33	47	138.474	59.23	33	47	165.081	58.97	35	51	171.98	59.1	37	52	160.636	59.1	36	50	179.054	58.72	39	56	193.484	60.26	40	60	198.037	58.85	39	60	130.396	59.1	37	52	113.809	56.41	33	50	136.642
D4A4D5	Protein LOC100362751 OS=Rattus norvegicus GN=LOC498555 PE=3 SV=1 - [D4A4D5_RAT]	71.3	6	6	104	115	11.6989	4.53857	22.1305	66.96	4	6	18.8648	66.96	4	6	20.2365	66.96	4	6	21.586	66.96	4	6	21.6202	66.96	4	6	22.8199	56.52	3	6	18.4147	56.52	3	5	26.8647	70.43	5	7	20.0715	66.96	4	7	5.86136	45.22	2	3	16.6908
P21575-8	Isoform 8 of Dynamin-1 OS=Rattus norvegicus GN=Dnm1 - [DYN1_RAT]	71.26	3	64	1267	856	96.3385	7.1665	187.808	57.36	41	69	165.687	62.62	49	68	181.181	59.93	46	68	194.469	57.01	45	71	191.62	63.32	49	74	211.117	62.97	48	79	207.462	58.76	46	72	218.884	59.46	47	72	140.225	62.15	49	68	148.167	60.28	49	75	137.286
Q6P7Q4	Lactoylglutathione lyase OS=Rattus norvegicus GN=Glo1 PE=1 SV=3 - [LGUL_RAT]	71.2	13	13	206	184	20.8063	5.31299	17.3918	52.72	7	8	23.1161	59.24	10	12	29.3348	71.2	11	12	30.4931	50.54	9	11	33.3671	35.33	8	11	31.6605	71.2	11	13	31.1539	45.11	10	11	36.5517	71.2	12	13	21.245	60.33	11	13	15.0247	35.33	7	8	24.7567
P80254	D-dopachrome decarboxylase OS=Rattus norvegicus GN=Ddt PE=1 SV=3 - [DOPD_RAT]	71.19	6	6	130	118	13.1248	6.53662	20.3266	61.86	5	8	16.6037	64.41	5	7	19.9719	64.41	5	7	23.7827	71.19	6	9	27.346	61.86	5	9	17.9307	71.19	6	8	20.2569	58.47	5	7	10.9353	71.19	6	6	7.90484	51.69	5	6	17.1146	61.86	5	7	12.9457
Q8VBU2	Protein NDRG2 OS=Rattus norvegicus GN=Ndrg2 PE=1 SV=1 - [NDRG2_RAT]	71.16	1	16	282	371	40.7531	5.30029	62.6418	61.46	11	17	52.1598	51.21	9	14	51.9891	45.82	8	13	68.0536	54.72	11	17	61.2706	48.79	9	15	67.6309	55.26	11	19	78.1239	61.19	14	21	82.8827	58.76	13	20	41.0189	41.51	9	13	21.7751	49.33	10	13	34.8431
B0BNA5	Coactosin-like protein OS=Rattus norvegicus GN=Cotl1 PE=1 SV=1 - [COTL1_RAT]	71.13	11	11	146	142	15.922	5.40186	18.7448	54.93	8	9	17.4339	54.23	7	8	18.6813	50	7	8	18.862	54.23	7	8	22.2021	54.93	8	10	23.8872	60.56	7	9	19.0082	54.23	7	8	22.909	54.93	8	9	18.3111	54.23	7	8	10.1855	57.04	8	9	12.7863
F1MAQ5	Microtubule-associated protein OS=Rattus norvegicus GN=Map2 PE=4 SV=2 - [F1MAQ5_RAT]	71.13	1	104	1961	1829	198.784	4.83057	338.77	54.18	71	109	326.15	55.55	71	107	358.832	60.31	78	117	365.509	60.36	78	114	382.647	56.86	77	114	346.445	52.65	72	107	366.304	56.31	77	115	414.365	60.2	82	124	233.748	55.66	75	109	215.41	56.81	78	112	167.073
F1LX07	Protein Slc25a12 (Fragment) OS=Rattus norvegicus GN=Slc25a12 PE=3 SV=2 - [F1LX07_RAT]	71.11	38	38	691	675	74.1807	8.74854	131.008	56.89	26	39	104.077	55.11	25	35	116.796	56.89	27	38	135.672	58.81	28	41	136.911	58.37	28	42	126.066	57.78	28	41	121.567	59.56	29	40	138.767	57.63	29	43	94.7321	54.22	26	36	70.6477	53.33	27	35	91.9566
P68136	Actin, alpha skeletal muscle OS=Rattus norvegicus GN=Acta1 PE=1 SV=1 - [ACTS_RAT]	71.09	2	26	813	377	42.0239	5.38916	97.6485	39.26	16	44	97.8232	39.26	16	45	96.4737	39.26	15	43	107.056	39.26	16	46	97.8005	38.99	15	44	91.6985	45.36	17	45	133.34	70.29	24	57	128.817	40.58	21	56	74.0698	39.26	16	44	56.7654	37.67	15	41	63.5469
D3ZD09	Cytochrome c oxidase subunit 6B1 OS=Rattus norvegicus GN=Cox6b1 PE=4 SV=1 - [D3ZD09_RAT]	70.93	7	7	136	86	10.0649	8.71924	16.3518	62.79	5	7	16.6467	62.79	5	7	16.6171	70.93	6	8	23.0954	70.93	6	9	20.184	62.79	5	8	12.6592	61.63	5	6	19.6751	70.93	6	8	15.6872	59.3	5	6	11.7226	70.93	6	8	15.8166	70.93	6	8	12.7404
P36201	Cysteine-rich protein 2 OS=Rattus norvegicus GN=Crip2 PE=2 SV=1 - [CRIP2_RAT]	70.67	9	9	102	208	22.6811	8.63135	24.3331	60.58	5	7	25.1594	52.88	4	7	20.6804	56.25	6	9	27.0569	57.21	6	9	22.6786	45.67	4	6	16.981	46.15	4	5	15.3104	48.56	5	6	24.1602	51.92	5	7	5.93604	42.79	4	4	3.65223	52.4	6	7	3.30864
P62076	Mitochondrial import inner membrane translocase subunit Tim13 OS=Rattus norvegicus GN=Timm13 PE=3 SV=1 - [TIM13_RAT]	70.53	6	6	55	95	10.4509	8.17725	8.56123	36.84	3	3	5.56951	36.84	3	3	7.88319	36.84	3	3	8.97516	36.84	3	3	9.03169	36.84	3	3	14.3325	70.53	5	5	6.00969	25.26	2	2	8.58724	36.84	3	3	5.29812	42.11	3	3	2.67992	22.11	2	2	4.73973
P18889	Putative preoptic regulatory factor 1 OS=Rattus norvegicus GN=Porf1 PE=2 SV=1 - [PORF1_RAT]	70.27	1	1	2	37	4.13897	4.23389						0				0			0	70.27	1	2		0				0								0								0
Q62951	Dihydropyrimidinase-related protein 4 (Fragment) OS=Rattus norvegicus GN=Dpysl4 PE=1 SV=1 - [DPYL4_RAT]	70.21	27	27	440	564	61.0471	6.771	83.7052	52.13	18	27	81.6503	56.38	18	27	69.292	53.37	17	24	73.1808	47.16	14	21	79.4317	51.95	17	24	91.1483	56.74	19	29	77.9888	41.49	13	22	85.16	49.29	15	25	45.9319	37.77	11	16	55.5811	63.12	21	26	54.2158
F1LNK0	Microtubule-associated protein OS=Rattus norvegicus GN=Map2 PE=4 SV=2 - [F1LNK0_RAT]	70.16	1	104	1946	1860	202.122	4.88135	339.063	53.49	71	109	326.266	54.84	71	107	356.887	58.82	77	116	365.552	59.57	78	114	380.288	55.43	76	113	344.377	51.29	71	106	363.959	54.89	76	114	412.045	58.71	81	123	231.82	54.25	74	108	215.41	55.38	77	111	165.074
O88600	Heat shock 70 kDa protein 4 OS=Rattus norvegicus GN=Hspa4 PE=1 SV=1 - [HSP74_RAT]	69.76	43	46	627	840	93.9971	5.21143	93.1466	45.36	27	32	98.2193	44.76	26	35	93.4513	45.83	28	39	91.743	46.19	28	36	108.069	48.93	30	38	88.8011	46.67	29	37	91.2081	42.74	24	29	95.5624	45.36	27	34	68.8117	45	27	35	66.489	50.83	30	34	78.9456
P37361	Metallothionein-3 OS=Rattus norvegicus GN=Mt3 PE=2 SV=1 - [MT3_RAT]	69.7	4	4	62	66	6.80358	7.6792	10.6079	68.18	3	4	6.38525	68.18	3	3	2.8663	28.79	1	1	8.66821	46.97	2	3	7.0529	46.97	2	2	10.7037	68.18	3	4	15.5109	68.18	3	5	16.258	68.18	3	5	4.22603	68.18	3	4	5.12753	48.48	3	4	4.05418
P55053	Fatty acid-binding protein, epidermal OS=Rattus norvegicus GN=Fabp5 PE=1 SV=3 - [FABP5_RAT]	69.63	9	9	198	135	15.0495	7.18115	37.3045	69.63	9	13	31.9457	60.74	7	10	36.9591	69.63	9	12	32.1801	54.07	7	10	38.6629	69.63	9	12	31.0103	69.63	8	12	26.7303	54.07	7	9	24.2222	45.93	7	9	21.0455	54.07	8	11	21.1401	69.63	9	11	22.8931
P26772	10 kDa heat shock protein, mitochondrial OS=Rattus norvegicus GN=Hspe1 PE=1 SV=3 - [CH10_RAT]	69.61	9	9	179	102	10.8949	8.92432	17.5602	54.9	6	8	16.9844	62.75	8	9	22.8048	67.65	8	10	23.6887	62.75	7	10	24.898	62.75	8	11	22.0417	51.96	6	10	24.7073	69.61	8	11	23.7564	60.78	7	10	21.6273	62.75	8	11	20.0535	69.61	9	13	14.3622
Q9QUL6	Vesicle-fusing ATPase OS=Rattus norvegicus GN=Nsf PE=1 SV=1 - [NSF_RAT]	69.22	59	59	1112	744	82.6	6.99072	151.503	53.36	41	59	134.792	50	39	54	159.897	61.02	46	63	180.021	54.84	39	59	166.718	55.65	40	59	156.214	53.09	40	61	169.497	60.48	44	64	183.478	60.48	47	67	139.058	53.23	37	60	95.6691	58.06	40	56	144.619
D4ACB8	Chaperonin subunit 8 (Theta) (Predicted), isoform CRA_a OS=Rattus norvegicus GN=Cct8 PE=3 SV=1 - [D4ACB8_RAT]	69.16	34	34	340	548	59.5505	5.5415	47.8227	38.32	16	18	43.0732	40.33	17	18	45.654	40.69	17	18	50.2324	40.33	16	18	58.2988	42.88	20	22	48.8345	39.6	17	19	47.6838	36.5	16	17	72.5537	44.16	21	25	37.464	44.34	19	21	35.4149	40.51	18	19	35.4958
F1LXA0	NADH dehydrogenase (Ubiquinone) 1 alpha subcomplex, 12 (Predicted), isoform CRA_b OS=Rattus norvegicus GN=Ndufa12 PE=4 SV=2 - [F1LXA0_RAT]	68.97	8	8	135	145	17.1667	9.70068	20.0523	61.38	6	7	24.2266	61.38	7	9	26.8115	52.41	5	9	29.7759	61.38	6	10	28.4384	61.38	7	9	23.3453	61.38	6	9	22.1791	53.1	5	7	21.4363	53.1	6	7	11.2194	53.1	5	5	10.0867	49.66	6	7	10.348
M0R660	Glyceraldehyde-3-phosphate dehydrogenase OS=Rattus norvegicus GN=RGD1565368 PE=3 SV=1 - [M0R660_RAT]	68.77	2	21	927	333	35.7601	8.25049	164.212	63.96	17	48	155.273	62.16	18	46	176.493	63.06	18	55	207.705	61.56	17	59	180.552	59.76	16	49	191.277	61.56	17	56	188.409	61.26	17	54	196.829	65.47	19	57	113.161	59.76	16	51	106.954	57.96	15	44	132.114
R9PY00	Vesicle-associated membrane protein 2 (Fragment) OS=Rattus norvegicus GN=Vamp2 PE=4 SV=1 - [R9PY00_RAT]	68.7	4	8	257	115	12.5517	8.1333	51.5729	60.87	7	15	47.8118	60.87	6	15	48.4366	60.87	5	15	55.787	60.87	7	16	59.9206	60.87	6	16	52.2504	60.87	7	15	56.7069	60.87	7	16	68.1121	68.7	8	20	27.1029	60.87	6	9	28.73	60.87	7	15	26.4711
P20788	Cytochrome b-c1 complex subunit Rieske, mitochondrial OS=Rattus norvegicus GN=Uqcrfs1 PE=1 SV=2 - [UCRI_RAT]	68.61	16	16	252	274	29.4272	8.86572	40.3969	35.04	8	13	36.4323	32.12	7	11	37.5087	35.04	8	13	42.7125	39.78	9	14	39.9564	42.34	10	14	35.7613	44.89	12	16	49.6294	58.76	11	16	43.1716	42.34	11	16	28.1923	45.26	8	11	37.6972	49.27	12	16	27.3695
Q5XIH3	NADH dehydrogenase (Ubiquinone) flavoprotein 1 OS=Rattus norvegicus GN=Ndufv1 PE=2 SV=1 - [Q5XIH3_RAT]	68.53	27	27	356	464	50.6986	8.07471	49.1057	45.69	16	20	31.5617	39.22	12	13	41.1066	39.01	13	15	47.6308	44.83	15	16	61.6405	49.35	18	23	48.9878	46.55	16	18	59.3003	47.41	18	20	60.1475	51.94	20	22	37.1422	51.08	18	21	29.9391	42.03	13	17	49.1276
Q6P6V0	Glucose-6-phosphate isomerase OS=Rattus norvegicus GN=Gpi PE=1 SV=1 - [G6PI_RAT]	68.46	31	31	574	558	62.7871	7.76709	92.9097	50.72	18	33	74.6115	45.7	18	27	84.5344	45.34	17	29	85.9338	43.73	16	26	81.9086	41.76	17	28	102.901	55.38	22	35	81.0239	46.95	17	28	106.075	49.46	22	33	58.8813	51.79	23	34	59.9933	47.67	20	32	76.4893
Q62952	Dihydropyrimidinase-related protein 3 OS=Rattus norvegicus GN=Dpysl3 PE=1 SV=2 - [DPYL3_RAT]	68.42	25	30	607	570	61.928	6.49365	115.298	58.07	23	33	110.571	58.07	23	35	113.385	57.89	23	35	116.749	61.93	24	34	119.966	54.39	22	34	114.623	51.75	20	35	113.916	58.07	23	32	130.255	57.54	22	38	83.989	57.72	22	30	72.3094	51.4	19	29	87.6813
G3V6S0	Protein Sptbn1 OS=Rattus norvegicus GN=Sptbn1 PE=4 SV=2 - [G3V6S0_RAT]	68.39	142	158	2661	2357	273.317	5.71924	453.302	52.48	105	143	444.894	55.54	110	148	452.684	53.67	107	148	503.392	55.88	109	154	474.853	58.12	118	155	465.644	54.94	106	149	468.977	54.9	110	150	540.606	58.68	116	161	343.505	55.83	112	154	294.071	51.85	104	135	321.627
P61751	ADP-ribosylation factor 4 OS=Rattus norvegicus GN=Arf4 PE=2 SV=2 - [ARF4_RAT]	68.33	3	11	219	180	20.3836	7.13721	32.9688	46.67	8	10	48.9792	48.89	8	14	42.241	60	10	13	52.6724	56.67	9	14	43.5526	48.89	8	12	35.3797	42.22	8	11	40.8287	41.67	7	11	45.0653	38.89	7	12	42.6612	53.89	8	14	32.9521	37.78	6	11	27.7737
P35332	Hippocalcin-like protein 4 OS=Rattus norvegicus GN=Hpcal4 PE=2 SV=2 - [HPCL4_RAT]	68.06	9	13	134	191	22.231	4.84326	19.1845	33.51	5	7	17.5385	39.27	6	8	19.0647	37.17	5	7	23.3516	50.26	8	9	20.3821	37.17	6	7	22.0318	42.93	7	8	21.2083	28.8	4	5	33.6089	44.5	8	9	18.1185	41.88	7	8	9.91189	36.65	5	5	18.1254
Q9WVA1	Mitochondrial import inner membrane translocase subunit Tim8 A OS=Rattus norvegicus GN=Timm8a PE=1 SV=1 - [TIM8A_RAT]	68.04	4	4	34	97	11.0353	5.16064	2.2496	11.34	1	1	5.69113	22.68	2	2	2.40287	11.34	1	1	8.57205	52.58	3	3	2.07202	11.34	1	1	5.81625	41.24	2	2	9.45124	56.7	3	3	6.19298	41.24	2	2	2.83203	26.8	2	2	4.33633	26.8	2	3	2.9374
Q04940	Neurogranin OS=Rattus norvegicus GN=Nrgn PE=1 SV=1 - [NEUG_RAT]	67.95	3	4	83	78	7.49151	7.04932	14.652	67.95	4	5	14.368	67.95	4	5	14.4057	67.95	4	5	18.2891	67.95	4	6	8.3766	66.67	3	3	13.3167	67.95	4	4	12.3365	67.95	3	4	14.2456	67.95	3	4	11.1723	67.95	4	5	14.4524	67.95	4	6	8.31578
D4A0E2	Protein Napg OS=Rattus norvegicus GN=Napg PE=4 SV=1 - [D4A0E2_RAT]	67.83	16	16	192	230	25.5857	4.90674	18.9968	39.13	9	10	17.0091	44.35	8	10	22.4489	43.91	11	11	24.9186	51.3	10	12	30.5144	39.13	9	12	22.7114	47.39	9	10	17.1234	47.39	9	9	26.711	62.17	12	14	14.4705	36.52	7	7	22.0203	49.13	10	12	12.4141
G3V7L8	ATPase, H+ transporting, V1 subunit E isoform 1, isoform CRA_a OS=Rattus norvegicus GN=Atp6v1e1 PE=3 SV=1 - [G3V7L8_RAT]	67.7	16	16	281	226	26.1268	8.42627	52.2776	46.9	11	16	45.0432	47.35	11	14	51.5774	54.87	13	17	47.8648	51.33	11	15	49.6824	42.92	11	15	48.7131	42.92	11	15	54.1269	54.87	14	17	54.0783	51.77	12	17	35.36	41.15	11	16	33.54	58.41	13	17	39.6177
D3ZW55	Inosine triphosphate pyrophosphatase OS=Rattus norvegicus GN=Itpa PE=3 SV=1 - [ITPA_RAT]	67.68	11	11	163	198	21.9131	5.65576	43.9392	54.55	7	11	37.2939	59.09	8	11	38.6246	59.6	7	10	36.3043	55.05	8	11	43.5359	61.62	8	11	37.3217	50	6	9	25.6831	55.56	6	7	33.6673	57.07	6	8	21.3086	54.55	6	8	23.5697	43.94	6	9	19.9779
P18420	Proteasome subunit alpha type-1 OS=Rattus norvegicus GN=Psma1 PE=1 SV=2 - [PSA1_RAT]	67.68	15	15	125	263	29.4988	6.60986	10.1341	32.32	7	7	13.9299	25.86	6	7	15.5758	27.76	7	8	18.9983	27.76	7	9	14.887	30.42	7	8	18.777	33.08	8	10	15.2112	20.91	5	6	16.0498	29.28	7	8	8.8828	31.94	5	5	13.2904	39.54	9	9	5.33668
P43425	Guanine nucleotide-binding protein G(I)/G(S)/G(O) subunit gamma-7 OS=Rattus norvegicus GN=Gng7 PE=2 SV=2 - [GBG7_RAT]	67.65	6	6	62	68	7.51894	8.51416	8.07931	44.12	4	4	5.7064	33.82	2	2	4.8343	39.71	3	3	2.27328	19.12	2	2	8.75346	57.35	3	3	5.93947	33.82	2	2	14.8695	64.71	5	6	11.3798	41.18	3	4	9.55431	41.18	3	4		0			8.60745
P29419	ATP synthase subunit e, mitochondrial OS=Rattus norvegicus GN=Atp5i PE=1 SV=3 - [ATP5I_RAT]	67.61	6	6	92	71	8.24948	9.34912	15.3309	63.38	5	7	10.7089	61.97	4	6	9.91726	46.48	4	6	12.2918	46.48	3	4	12.9432	46.48	4	5	12.0651	46.48	4	6	13.9557	46.48	4	6	14.8025	49.3	4	6	6.45461	45.07	3	4	1.78254	26.76	2	2	6.24477
B5DFD8	SH3 domain-binding glutamic acid-rich-like protein OS=Rattus norvegicus GN=Sh3bgrl PE=2 SV=1 - [B5DFD8_RAT]	67.54	6	6	60	114	12.7923	5.07178	6.64785	26.32	2	2	6.47355	26.32	2	2	9.49302	35.09	3	3	10.1751	35.09	3	3	11.2889	43.86	4	4	9.98105	35.09	3	3	11.9923	35.09	3	4	9.59254	35.09	3	3	9.71213	44.74	4	5	7.48362	33.33	3	3	8.68351
Q920L2	Succinate dehydrogenase [ubiquinone] flavoprotein subunit, mitochondrial OS=Rattus norvegicus GN=Sdha PE=1 SV=1 - [SDHA_RAT]	67.53	32	32	573	656	71.5697	7.1665	81.4471	49.54	20	28	95.701	50.61	22	31	87.1552	49.09	22	33	99.148	58.38	25	34	128.397	63.26	27	38	90.6821	50	21	29	89.8876	52.44	22	30	96.4485	46.8	21	31	62.6927	57.01	24	30	54.7	48.02	22	29	49.3543
P19527	Neurofilament light polypeptide OS=Rattus norvegicus GN=Nefl PE=1 SV=3 - [NFL_RAT]	67.53	35	39	634	542	61.298	4.65283	94.2222	47.42	24	32	91.9797	52.95	25	33	108.34	49.08	27	40	119.677	57.75	30	40	110.963	46.86	24	36	93.3888	45.2	23	32	85.4656	38.01	20	28	107.794	44.1	22	34	82.9339	51.11	24	34	76.2343	50.18	27	33	103.095
G3V8C3	Vimentin OS=Rattus norvegicus GN=Vim PE=3 SV=1 - [G3V8C3_RAT]	67.38	28	32	249	466	53.6681	5.12256	19.4619	17.81	7	7	18.1189	24.89	10	10	30.2253	37.55	15	16	30.5088	32.62	14	15	21.0142	26.82	11	11	27.3734	30.26	13	13	39.5848	38.84	16	17	35.4449	36.05	17	17	17.3902	22.96	10	10	19.3664	31.33	14	14	19.4173
P63004	Platelet-activating factor acetylhydrolase IB subunit alpha OS=Rattus norvegicus GN=Pafah1b1 PE=1 SV=2 - [LIS1_RAT]	67.32	22	23	204	410	46.6401	7.37158	20.5702	21.95	8	9	25.5993	27.8	9	10	27.2957	30	10	11	24.51	30	10	11	42.7862	44.15	13	15	30.4184	32.68	11	12	24.1017	27.32	10	11	27.9011	23.41	8	10	18.3059	32.68	11	12	21.852	30.24	10	11	19.6013
B2RZ72	Actin related protein 2/3 complex, subunit 4 (Predicted), isoform CRA_a OS=Rattus norvegicus GN=Arpc4 PE=2 SV=1 - [B2RZ72_RAT]	67.26	10	10	88	168	19.6543	8.42627	10.9922	28.57	4	4	14.2368	33.33	5	5	8.86019	19.64	4	4	9.2523	19.64	4	4	10.0323	26.79	4	4	11.6077	31.55	4	4	12.0093	33.33	5	5	14.7787	45.24	6	6	18.1075	31.55	5	5	19.0461	41.07	5	6	15.9685
P23565	Alpha-internexin OS=Rattus norvegicus GN=Ina PE=1 SV=2 - [AINX_RAT]	67.13	5	35	704	505	56.0816	5.22412	111.369	53.86	26	36	105.088	52.67	25	36	126.892	59.41	29	42	126.596	54.06	27	42	123.096	55.05	27	40	130.253	55.84	29	42	125.938	55.84	27	38	136.056	57.82	28	40	78.3973	64.75	28	37	85.2819	53.27	26	37	87.1921
Q05962	ADP/ATP translocase 1 OS=Rattus norvegicus GN=Slc25a4 PE=1 SV=3 - [ADT1_RAT]	66.78	12	25	771	298	32.9682	9.78857	92.9356	54.7	16	39	81.2346	46.31	13	36	84.1522	52.35	16	35	91.4682	55.37	17	37	93.7933	52.35	16	38	97.2095	60.4	17	43	134.668	57.38	20	53	143.409	62.42	21	57	86.4611	52.35	16	42	59.5406	57.72	18	35	91.1091
P62982	Ubiquitin-40S ribosomal protein S27a OS=Rattus norvegicus GN=Rps27a PE=1 SV=2 - [RS27A_RAT]	66.67	12	12	192	156	17.9395	9.64209	22.4185	51.28	9	10	20.7809	51.28	8	9	23.0947	47.44	8	10	27.8234	47.44	9	10	32.7069	59.62	9	13	21.7908	51.28	7	9	29.403	59.62	8	12	25.3787	51.28	9	11	25.2576	56.41	9	14	22.0608	56.41	8	10	20.0712
Q06647	ATP synthase subunit O, mitochondrial OS=Rattus norvegicus GN=Atp5o PE=1 SV=1 - [ATPO_RAT]	66.67	12	12	276	213	23.3828	10.0229	44.8818	65.73	11	16	47.8425	65.73	11	19	39.484	66.67	12	16	45.0712	61.5	10	14	39.7228	65.73	11	14	43.7755	65.73	11	15	57.3874	66.67	12	18	53.8792	66.67	12	19	28.8972	66.67	12	15	24.369	48.36	8	11	29.0944
P04906	Glutathione S-transferase P OS=Rattus norvegicus GN=Gstp1 PE=1 SV=2 - [GSTP1_RAT]	66.67	9	9	133	210	23.4241	7.35693	14.9167	30.95	4	6	18.0146	58.1	6	8	18.7003	28.1	4	7	15.2228	30.48	5	7	22.9751	46.67	7	9	13.6804	25.24	4	6	20.5685	41.43	6	8	25.2222	41.9	6	9	16.0613	32.86	5	8	16.0068	36.67	5	8	16.219
F1LRT5	Bis(5'-adenosyl)-triphosphatase OS=Rattus norvegicus GN=Fhit PE=4 SV=1 - [F1LRT5_RAT]	66.67	7	7	62	150	17.3609	6.63916	9.71109	20	2	3	11.8136	34.67	3	4	18.6921	46.67	4	6	6.05206	21.33	2	4	8.91262	20	2	3	12.5726	34.67	3	5	2.42442	9.33	1	2	2.21578	9.33	1	2	13.2255	40	5	5	2.68601	6.67	1	1	7.10779
P62762	Visinin-like protein 1 OS=Rattus norvegicus GN=Vsnl1 PE=1 SV=2 - [VISL1_RAT]	66.49	10	14	178	191	22.128	5.14795	24.1062	45.55	8	10	16.4672	37.7	7	9	20.4933	41.36	8	9	31.88	48.17	10	13	26.6066	47.12	9	11	21.9201	41.36	8	10	18.7672	32.98	6	8	23.8083	36.65	7	9	13.2958	51.83	10	13	8.34579	33.51	7	8	20.5062
Q5FVI6	V-type proton ATPase subunit C 1 OS=Rattus norvegicus GN=Atp6v1c1 PE=2 SV=1 - [VATC1_RAT]	66.49	26	26	302	382	43.8729	7.45947	32.5997	41.88	15	15	29.1367	42.93	17	17	48.4109	53.4	18	20	51.2041	49.74	19	19	36.2509	42.41	18	18	43.6766	46.86	18	19	35.5659	43.98	15	15	39.9706	46.6	15	16	26.8121	34.29	11	12	31.5253	57.85	20	21	23.8173
A0A096MJM1	Protein Rhog OS=Rattus norvegicus GN=Rhog PE=4 SV=2 - [A0A096MJM1_RAT]	66.49	9	10	112	185	20.6095	7.95752	16.5751	42.16	5	6	19.6201	42.16	6	7	14.5524	42.16	5	7	17.53	32.97	4	6	18.0174	35.14	5	6	15.3713	42.16	5	7	18.5065	49.73	6	7	20.4662	42.16	5	7	6.26592	35.14	4	5	13.9191	48.11	6	7	8.8709
P01041	Cystatin-B OS=Rattus norvegicus GN=Cstb PE=1 SV=1 - [CYTB_RAT]	66.33	5	5	73	98	11.1886	6.30322	7.87279	23.47	2	3	9.93901	45.92	3	4	10.0127	45.92	3	4	10.0964	23.47	2	3	18.815	45.92	3	5	14.2831	23.47	2	4	6.53681	23.47	2	3	14.4212	55.1	4	6	3.366	34.69	3	4	2.01984	23.47	2	4	4.53454
P61206	ADP-ribosylation factor 3 OS=Rattus norvegicus GN=Arf3 PE=2 SV=2 - [ARF3_RAT]	66.3	5	13	295	181	20.5877	7.43018	42.8018	54.7	10	14	50.6881	54.7	10	15	49.3702	66.3	12	16	63.8638	54.7	10	18	57.186	54.7	10	17	44.1547	58.01	11	15	50.0595	62.98	11	15	59.3492	62.98	11	17	51.3325	61.88	10	19	46.648	61.88	10	17	39.5507
B0BMW2	3-hydroxyacyl-CoA dehydrogenase type-2 OS=Rattus norvegicus GN=Hsd17b10 PE=2 SV=1 - [B0BMW2_RAT]	66.28	16	17	114	261	27.2325	8.5874	13.9711	30.27	5	5	8.9767	21.46	4	4	16.6048	31.42	6	6	18.9174	32.57	5	5	26.6752	46.36	8	8	17.7541	30.65	6	6	17.2252	23.37	4	4	21.1338	29.89	5	5	14.5182	28.74	5	6	27.5184	49.43	8	11	26.0891
Q3T1J1	Eukaryotic translation initiation factor 5A-1 OS=Rattus norvegicus GN=Eif5a PE=1 SV=3 - [IF5A1_RAT]	66.23	9	9	193	154	16.8214	5.23682	21.2858	51.3	6	9	25.6864	51.3	6	10	27.9156	51.3	7	10	26.1776	51.3	6	10	26.9144	48.05	7	13	30.2609	48.05	7	11	32.8128	51.3	8	12	28.1255	51.3	7	12	15.3225	50.65	6	10	15.4381	30.52	5	9	10.4038
P54311	Guanine nucleotide-binding protein G(I)/G(S)/G(T) subunit beta-1 OS=Rattus norvegicus GN=Gnb1 PE=1 SV=4 - [GBB1_RAT]	66.18	8	16	419	340	37.353	5.99854	74.2094	53.24	12	24	55.146	40.88	10	21	66.6918	43.82	11	22	73.5399	53.24	12	22	79.133	52.94	12	22	68.8268	40.59	10	20	95.3149	62.35	13	27	108.621	63.24	14	28	54.8625	40.88	10	23	67.5667	65.29	14	28	53.9028
Q66HF1	NADH-ubiquinone oxidoreductase 75 kDa subunit, mitochondrial OS=Rattus norvegicus GN=Ndufs1 PE=1 SV=1 - [NDUS1_RAT]	66.16	41	41	604	727	79.3616	5.89697	90.6397	45.67	26	32	83.9351	43.88	24	29	101.5	48.01	29	36	106.261	49.24	28	35	98.5468	47.32	28	33	92.3021	47.32	28	32	97.8531	47.32	27	32	94.9954	43.33	26	34	92.2407	54.88	29	35	73.1193	52.13	30	36	77.7232
Q4V7C7	Actin-related protein 3 OS=Rattus norvegicus GN=Actr3 PE=1 SV=1 - [ARP3_RAT]	66.03	18	22	401	418	47.327	5.88428	76.4258	59.33	16	22	71.6256	58.37	16	24	76.0438	58.37	16	25	71.294	50.96	13	20	80.5431	57.18	15	24	85.2991	58.85	16	25	81.6033	57.89	15	23	74.7064	54.07	15	22	61.5728	61.72	17	24	60.7799	62.92	18	24	43.9975
P60841-2	Isoform 2 of Alpha-endosulfine OS=Rattus norvegicus GN=Ensa - [ENSA_RAT]	65.81	7	8	67	117	12.9135	8.26514	8.87528	35.9	3	4	7.04745	35.9	3	4	10.1022	41.03	4	5	9.26941	41.03	3	4	5.50071	41.03	3	3	11.6846	41.03	4	5	7.48583	23.93	2	3	7.08451	23.93	2	3	4.39331	32.48	3	3	6.12242	41.88	4	4	1.75456
Q5XIM9	T-complex protein 1 subunit beta OS=Rattus norvegicus GN=Cct2 PE=1 SV=3 - [TCPB_RAT]	65.79	32	32	420	535	57.4221	6.45557	78.7131	47.29	19	22	76.014	44.86	18	25	83.5074	40.93	19	26	84.121	45.98	19	25	77.362	46.92	18	22	83.3319	44.49	20	26	56.2421	37.57	13	18	79.9165	42.99	18	24	46.0148	41.68	16	21	47.797	43.74	18	21	59.1586
P62161	Calmodulin OS=Rattus norvegicus GN=Calm1 PE=1 SV=2 - [CALM_RAT]	65.77	13	13	536	149	16.8268	4.22119	72.8063	52.35	11	27	93.17	52.35	11	34	96.0661	52.35	11	33	89.4786	52.35	11	33	99.3718	52.35	11	29	88.2962	52.35	11	33	90.7971	65.77	12	27	102.846	65.77	12	31	56.6672	52.35	10	23	55.6581	52.35	10	26	69.8336
P11598	Protein disulfide-isomerase A3 OS=Rattus norvegicus GN=Pdia3 PE=1 SV=2 - [PDIA3_RAT]	65.74	35	35	461	505	56.5877	6.21436	81.6958	55.05	25	30	60.196	45.74	21	24	75.0035	52.28	23	27	69.1455	45.74	21	25	92.3531	57.43	25	32	70.0237	55.45	25	29	60.8836	44.55	22	26	73.5266	50.5	22	26	46.2875	41.39	17	22	38.261	48.91	20	25	42.0648
Q3T1K5	F-actin-capping protein subunit alpha-2 OS=Rattus norvegicus GN=Capza2 PE=1 SV=1 - [CAZA2_RAT]	65.73	10	16	250	286	32.9466	5.84619	47.1346	43.71	9	13	50.8954	52.8	10	14	61.8036	52.8	10	17	62.6622	54.9	10	17	68.8724	58.39	11	17	33.4204	42.66	8	11	43.4165	38.46	9	13	54.4395	62.59	12	16	37.61	35.31	8	12	36.0045	37.41	7	13	39.188
Q5XI73	Rho GDP-dissociation inhibitor 1 OS=Rattus norvegicus GN=Arhgdia PE=1 SV=1 - [GDIR1_RAT]	65.69	14	14	275	204	23.3928	5.19873	57.7422	62.25	12	18	54.9178	54.9	10	18	56.6734	54.9	10	17	63.176	62.25	12	19	66.0784	62.25	12	18	54.1673	58.82	11	16	43.6253	59.31	11	15	47.4074	49.02	9	14	24.3773	46.08	8	11	18.8005	50	10	13	28.5804
P27605	Hypoxanthine-guanine phosphoribosyltransferase OS=Rattus norvegicus GN=Hprt1 PE=1 SV=1 - [HPRT_RAT]	65.6	12	13	224	218	24.4615	6.53662	34.8899	65.6	12	16	32.2323	65.6	12	14	35.5121	55.5	10	13	32.1789	47.71	9	12	33.7534	55.5	10	12	27.3539	53.21	10	12	30.6351	53.21	10	12	36.756	65.6	12	14	24.6458	61.01	11	13	16.5935	48.17	9	11	21.3461
Q6AYK6	Calcyclin-binding protein OS=Rattus norvegicus GN=Cacybp PE=1 SV=1 - [CYBP_RAT]	65.5	12	13	138	229	26.5247	7.86963	31.234	45.85	6	9	21.3134	48.03	7	9	21.0403	41.92	7	8	26.7953	39.3	6	9	11.6205	30.13	5	6	21.904	46.72	8	9	19.6733	29.26	6	8	30.3761	54.15	8	10	12.6683	24.89	6	6	14.8877	41.05	7	9	9.43243
Q7M0E3	Destrin OS=Rattus norvegicus GN=Dstn PE=1 SV=3 - [DEST_RAT]	65.45	11	12	95	165	18.5215	8.03076	17.7043	36.97	6	7	13.7993	31.52	4	5	15.2633	24.85	3	5	8.31516	14.55	2	3	17.0171	29.7	4	6	8.59728	14.55	2	3	12.727	21.82	4	6	15.1175	21.82	3	5	6.73874	32.12	5	5	15.402	36.36	6	8	9.28721
Q8R491	EH domain-containing protein 3 OS=Rattus norvegicus GN=Ehd3 PE=1 SV=2 - [EHD3_RAT]	65.42	16	30	216	535	60.7527	6.45557	42.5004	34.02	13	15	28.7224	25.98	10	11	24.0683	24.11	10	10	33.506	33.46	13	13	26.7961	26.73	11	11	15.5268	13.08	6	7	34.5884	25.23	12	12	30.0057	25.98	11	12	31.5531	23.93	11	12	18.5468	21.87	10	10	23.3987
P83941	Transcription elongation factor B polypeptide 1 OS=Rattus norvegicus GN=Tceb1 PE=1 SV=1 - [ELOC_RAT]	65.18	6	6	84	112	12.465	4.77979	13.4967	57.14	5	6	12.4514	57.14	5	6	11.0581	57.14	5	5	12.0172	50	4	5	16.2447	58.04	5	6	11.6707	58.04	5	6	14.0452	50	4	5	11.8959	50	4	4	6.02776	39.29	4	4	5.82873	58.04	5	5	5.42875
Q9WV97	Mitochondrial import inner membrane translocase subunit Tim9 OS=Rattus norvegicus GN=Timm9 PE=1 SV=3 - [TIM9_RAT]	65.17	5	5	81	89	10.3691	7.21045	5.23715	47.19	3	4	8.91315	34.83	2	4	13.5815	43.82	3	6	11.9902	34.83	2	4	10.5366	34.83	2	4	11.6926	43.82	3	5	9.1587	34.83	2	4	9.46456	43.82	3	5	3.09579	25.84	2	3	8.85961	56.18	4	6	5.71191
D4ACG7	Protein Cpne6 OS=Rattus norvegicus GN=Cpne6 PE=4 SV=2 - [D4ACG7_RAT]	65.17	29	30	496	557	61.7097	5.59229	61.4383	46.32	20	26	62.9455	46.32	20	27	70.3202	50.63	20	29	63.5392	42.73	19	24	84.7577	44.34	20	30	53.237	36.62	16	22	83.4125	43.09	21	31	77.3878	41.29	20	28	37.5236	45.96	20	25	44.154	43.81	19	25	55.0007
B0BMW0	RAB14, member RAS oncogene family OS=Rattus norvegicus GN=Rab14 PE=2 SV=1 - [B0BMW0_RAT]	65.12	11	13	220	215	23.8819	6.21436	44.2556	54.88	11	16	30.4036	53.95	9	12	38.4985	54.88	10	14	38.256	51.16	9	12	43.1204	56.28	9	15	33.0261	61.4	10	13	32.4268	45.12	8	11	31.3752	43.72	8	10	19.4982	49.3	9	11	26.3081	45.58	8	10	31.0741
D3ZVA6	Protein Bola2 OS=Rattus norvegicus GN=Bola2 PE=3 SV=1 - [D3ZVA6_RAT]	65.12	4	4	50	86	10.2082	5.78271	8.59279	32.56	2	3	2.6342	22.09	1	1	13.2119	44.19	2	4	6.3832	32.56	2	2	13.5891	54.65	3	4	7.70352	32.56	2	3	8.91836	32.56	2	3	3.39955	22.09	1	2	11.4503	65.12	4	4	5.21736	22.09	1	3	5.262
P02600	Myosin light chain 1/3, skeletal muscle isoform OS=Rattus norvegicus GN=Myl1 PE=1 SV=2 - [MYL1_RAT]	65.08	8	10	11	189	20.6665	5.03369		0				0											2.40351	8.47	1	1					32.9262	56.61	9	10		0				0
F1M7Y3	Protein Rap1gds1 OS=Rattus norvegicus GN=Rap1gds1 PE=4 SV=2 - [F1M7Y3_RAT]	65.06	22	22	319	478	52.2156	5.79541	51.0224	44.77	14	17	49.4358	45.61	16	19	41.7367	36.61	13	15	55.6371	42.47	15	19	56.481	41.63	15	18	61.1123	37.87	13	19	46.6749	33.68	12	15	53.7068	44.14	16	18	40.6287	39.96	13	15	40.2861	43.93	16	19	45.8888
P02688-3	Isoform 3 of Myelin basic protein OS=Rattus norvegicus GN=Mbp - [MBP_RAT]	64.94	1	15	525	154	17.2148	11.7515	58.0713	45.45	10	29	61.6501	41.56	9	29	56.3996	41.56	9	27	66.0181	48.05	10	27	69.9142	51.95	11	28	62.4163	48.05	10	27	58.0032	41.56	9	25	62.4176	48.05	9	24	47.7375	48.05	10	29	37.2066	53.25	10	28	50.3335
D4A5G8	Pyruvate dehydrogenase E1 component subunit alpha OS=Rattus norvegicus GN=Pdha1l1 PE=4 SV=2 - [D4A5G8_RAT]	64.89	1	26	370	393	43.5999	8.19189	62.2737	50.38	15	18	62.1796	54.45	16	19	72.6545	56.74	19	24	69.8634	52.67	17	20	69.5376	48.35	16	21	76.0671	55.98	18	23	60.8983	48.09	15	19	76.4646	52.16	14	21	39.321	49.87	16	19	42.3573	51.15	18	22	60.7384
D4A830	Protein Ppa2 OS=Rattus norvegicus GN=Ppa2 PE=4 SV=2 - [D4A830_RAT]	64.8	13	13	73	304	35.0244	6.52197	13.0839	24.34	4	4	5.81565	12.5	2	2	6.60449	11.84	2	2	16.228	36.84	6	6	12.7971	22.37	4	4	17.7679	24.34	4	5	15.4883	18.09	3	4	12.4451	18.09	3	3	10.2775	20.07	4	4	8.85461	25	5	5	8.90028
F7EPH4	Protein Ppa1 OS=Rattus norvegicus GN=Ppa1 PE=4 SV=1 - [F7EPH4_RAT]	64.71	12	12	170	289	32.7501	5.46533	37.8572	57.79	8	11	29.7764	55.02	8	9	38.9434	44.29	8	11	30.9651	54.33	8	10	37.2018	36.33	7	10	27.0048	37.37	6	8	31.0527	30.45	6	8	35.6415	36.33	6	9	21.7205	28.37	7	9	16.9116	41.87	8	9	20.6254
P10860	Glutamate dehydrogenase 1, mitochondrial OS=Rattus norvegicus GN=Glud1 PE=1 SV=2 - [DHE3_RAT]	64.7	34	34	688	558	61.3773	8.00146	128.997	52.51	26	41	101.769	52.51	24	37	91.6537	47.67	23	34	119.42	54.84	26	37	115.637	51.25	25	37	108.562	52.69	24	37	124.191	51.43	25	39	167.779	61.11	29	52	72.2949	42.29	22	37	75.4861	44.98	22	41	77.5497
D3ZE15	Protein LOC100911483 OS=Rattus norvegicus GN=LOC100911483 PE=4 SV=1 - [D3ZE15_RAT]	64.58	8	8	105	144	16.7657	9.48096	14.3018	52.78	6	6	20.6818	60.42	7	8	15.3493	45.83	6	6	17.484	53.47	7	7	19.4895	56.94	7	8	14.0492	50.69	6	6	4.6736	20.83	2	2	15.3643	52.78	6	6	14.9701	41.67	5	7	4.10101	29.17	4	5	8.93069
P04897	Guanine nucleotide-binding protein G(i) subunit alpha-2 OS=Rattus norvegicus GN=Gnai2 PE=1 SV=3 - [GNAI2_RAT]	64.51	12	22	354	355	40.4731	5.45264	54.1619	45.35	14	20	57.8153	55.77	16	22	58.1098	48.17	14	22	65.5083	55.77	16	23	62.1758	50.7	16	22	48.7686	51.27	16	20	60.6147	56.06	17	23	59.6962	50.42	14	21	35.9898	41.13	12	17	23.6938	39.72	11	16	41.1542
Q566C7	Diphosphoinositol polyphosphate phosphohydrolase 1 OS=Rattus norvegicus GN=Nudt3 PE=1 SV=1 - [NUDT3_RAT]	64.29	7	8	88	168	19.0836	6.34131	13.7111	31.55	4	6	11.2535	26.19	3	5	13.5531	41.07	4	6	15.8302	41.07	4	6	20.1658	36.31	4	6	14.9048	41.07	4	6	14.6645	35.71	4	6	19.1899	36.31	4	6	2.73479	19.05	3	4	5.24818	16.07	2	3	8.13533
P47875	Cysteine and glycine-rich protein 1 OS=Rattus norvegicus GN=Csrp1 PE=2 SV=2 - [CSRP1_RAT]	64.25	9	9	201	193	20.5998	8.57275	18.8485	51.3	6	10	31.7772	59.07	8	13	28.9815	59.07	8	11	40.4711	51.3	7	13	34.6523	51.3	7	12	31.9283	51.3	6	10	23.9887	42.49	5	9	25.8283	42.49	6	8	17.3904	64.25	8	11	11.2008	51.3	6	11	24.2539
B2RYW3	NADH dehydrogenase (Ubiquinone) 1 beta subcomplex, 9 OS=Rattus norvegicus GN=Ndufb9 PE=2 SV=1 - [B2RYW3_RAT]	64.25	11	11	141	179	21.8778	8.07471	15.0239	34.08	7	8	5.73159	32.96	6	7	9.04037	26.82	5	5	15.2777	32.96	6	7	13.0751	30.17	6	6	15.5657	30.17	6	7	27.9383	53.63	7	9	26.0448	52.51	9	11	7.54611	30.73	6	8	5.87894	36.87	5	6	5.43387
B0BNL2	PDZ domain-containing protein 2 OS=Rattus norvegicus GN=LOC364561 PE=2 SV=1 - [B0BNL2_RAT]	64.24	8	8	107	165	18.321	8.82178	19.546	49.09	4	5	9.4485	24.85	3	3	15.7809	44.85	4	5	13.88	23.64	2	3	19.7957	46.67	5	6	13.8507	28.48	3	4	11.6785	33.33	3	4	11.9979	30.3	3	3	30.915	56.97	7	11	13.4017	41.82	4	5	22.8239
D4AC23	Protein Cct7 OS=Rattus norvegicus GN=Cct7 PE=3 SV=1 - [D4AC23_RAT]	64.15	28	28	315	544	59.6202	8.00146	54.6336	36.76	16	20	40.4738	29.6	12	15	41.5852	33.09	14	17	57.3768	42.1	16	20	52.3441	40.26	16	19	56.124	36.76	15	18	54.4363	42.1	18	20	67.2585	43.2	18	21	39.7762	43.2	19	19	26.799	31.43	14	14	39.1615
P63170	Dynein light chain 1, cytoplasmic OS=Rattus norvegicus GN=Dynll1 PE=1 SV=1 - [DYL1_RAT]	64.04	3	6	108	89	10.3591	7.40088	12.9988	46.07	4	5	17.7006	58.43	5	7	15.0628	58.43	5	6	15.8713	57.3	4	6	19.8616	58.43	5	7	19.28	58.43	5	7	23.0024	64.04	5	7	20.6523	51.69	4	6	12.0768	58.43	5	8	8.202	44.94	3	4	13.9051
Q78P75	Dynein light chain 2, cytoplasmic OS=Rattus norvegicus GN=Dynll2 PE=1 SV=1 - [DYL2_RAT]	64.04	3	6	119	89	10.3431	7.37158	20.144	46.07	4	6	21.2629	58.43	5	7	20.0524	58.43	5	7	18.2924	57.3	4	6	23.4994	58.43	5	7	15.6649	58.43	5	6	23.1082	64.04	6	8	23.9947	51.69	5	8	13.2813	58.43	5	8	13.0523	44.94	3	5	17.4546
P62994-2	Isoform 2 of Growth factor receptor-bound protein 2 OS=Rattus norvegicus GN=Grb2 - [GRB2_RAT]	64.04	13	13	175	203	23.5407	6.80029	13.0742	38.42	8	9	12.1371	32.51	7	7	23.1577	46.31	10	13	25.8344	54.68	11	14	24.5953	48.28	10	11	17.493	45.32	9	10	18.6566	34.98	7	8	11.3159	30.54	7	8	16.6316	36.95	7	10	14.1362	43.35	8	10	13.4746
D3ZUP5	Protein Brk1 OS=Rattus norvegicus GN=Brk1 PE=4 SV=1 - [D3ZUP5_RAT]	64	7	7	42	75	8.75546	5.45264	2.90506	14.67	1	1	2.71871	14.67	1	1	5.00556	25.33	2	2	5.5819	25.33	2	2	2.89716	14.67	1	1	5.54491	32	2	2	10.4952	56	5	5	15.3348	56	5	6	5.01022	25.33	2	2	8.99903	50.67	4	4	4.87605
P51635	Alcohol dehydrogenase [NADP(+)] OS=Rattus norvegicus GN=Akr1a1 PE=1 SV=2 - [AK1A1_RAT]	64	19	19	256	325	36.4829	7.31299	52.7655	52	13	16	43.9796	58.46	14	16	51.1957	54.15	14	17	53.2855	52.62	12	15	50.1064	52.62	13	15	42.3482	55.08	13	14	47.7072	48.62	11	13	52.1698	47.08	10	13	34.2798	50.15	12	15	19.4987	36.62	9	10	24.8297
M0RDC5	Acyl-CoA-binding protein (Fragment) OS=Rattus norvegicus GN=Dbi PE=4 SV=1 - [M0RDC5_RAT]	63.95	7	7	176	86	9.8601	8.82178	30.9296	63.95	7	12	25.4298	62.79	6	10	26.4869	62.79	6	10	23.2937	62.79	5	8	25.9006	62.79	6	9	18.2955	63.95	7	8	27.9375	63.95	7	11	35.4951	61.63	6	11	16.1532	53.49	4	8	9.7295	63.95	6	9	19.2196
Q8CFN2-2	Isoform 2 of Cell division control protein 42 homolog OS=Rattus norvegicus GN=Cdc42 - [CDC42_RAT]	63.87	1	9	187	191	21.2689	6.03662	34.5452	58.12	8	12	31.1324	53.93	7	10	36.3327	58.12	8	12	36.2146	58.12	8	12	34.9677	52.36	7	11	33.6432	52.36	7	11	29.168	48.17	6	9	33.6068	58.12	8	11	18.5602	53.93	7	9	6.84887	41.88	5	6	15.0503
G3V6H5	Mitochondrial 2-oxoglutarate/malate carrier protein OS=Rattus norvegicus GN=Slc25a11 PE=3 SV=1 - [G3V6H5_RAT]	63.69	18	18	306	314	34.1149	9.96436	49.5682	59.24	15	19	37.5475	46.5	13	16	43.2989	51.91	14	18	49.0042	61.78	16	18	40.1977	52.87	14	17	40.671	45.86	13	17	43.5613	46.5	13	16	40.576	41.4	13	18	37.0204	49.68	13	16	31.9161	50.96	13	17	31.9306
Q9Z214	Homer protein homolog 1 OS=Rattus norvegicus GN=Homer1 PE=1 SV=2 - [HOME1_RAT]	63.66	20	21	212	366	41.2798	5.52881	30.5936	38.25	11	12	25.6916	30.87	9	10	32.3664	39.34	12	13	35.9326	34.7	11	13	39.9355	42.62	13	15	35.7393	39.89	12	13	28.0994	33.88	10	11	24.1535	29.23	9	10	21.8664	38.25	12	14	14.1198	37.16	11	11	20.098
P60881-2	Isoform 2 of Synaptosomal-associated protein 25 OS=Rattus norvegicus GN=Snap25 - [SNP25_RAT]	63.59	2	15	294	206	23.3212	4.85596	47.9207	55.83	13	19	50.4954	55.83	13	19	45.0516	52.43	12	17	52.9465	51.94	11	17	53.0356	51.94	11	17	51.5416	44.17	10	16	54.1787	54.85	13	17	64.2709	54.85	13	20	34.1507	45.15	10	14	31.1884	52.43	11	15	30.9117
O35303-5	Isoform 5 of Dynamin-1-like protein OS=Rattus norvegicus GN=Dnm1l - [DNM1L_RAT]	63.58	40	40	569	744	82.4884	6.96143	102.896	45.03	25	34	88.8471	47.85	25	32	87.4087	46.37	25	33	95.3548	47.31	26	33	111.679	50.27	28	38	101.996	51.88	28	37	99.4125	48.79	28	34	111.443	44.49	27	39	72.3399	43.01	24	31	55.9074	40.99	25	33	51.8361
P82995	Heat shock protein HSP 90-alpha OS=Rattus norvegicus GN=Hsp90aa1 PE=1 SV=3 - [HS90A_RAT]	63.57	37	55	1225	733	84.7618	5.0083	189.928	61.8	44	68	163.484	52.25	42	64	186.512	58.12	43	66	235.451	60.71	45	73	209.791	55.93	43	71	214.112	60.16	46	73	225.513	55.8	46	77	249.475	58.8	51	84	126.106	55.39	41	60	106.335	49.11	41	59	131.195
P56571	ES1 protein homolog, mitochondrial OS=Rattus norvegicus PE=1 SV=2 - [ES1_RAT]	63.53	12	12	284	266	28.1549	8.92432	41.1597	45.49	7	12	62.6721	62.78	10	19	56.2394	59.77	9	16	67.1556	63.53	11	20	63.1624	52.26	9	16	61.0456	50	9	16	67.6067	50	8	16	72.4584	50	9	17	38.5717	56.77	8	16	30.1883	45.11	7	14	31.2984
P68511	14-3-3 protein eta OS=Rattus norvegicus GN=Ywhah PE=1 SV=2 - [1433F_RAT]	63.41	13	20	373	246	28.194	4.89404	39.2854	45.12	11	16	49.2623	50.81	14	20	50.763	56.5	15	22	64.5517	57.72	16	24	56.7815	46.75	13	21	50.1532	50.81	12	20	66.6523	57.72	16	23	73.3897	54.47	14	26	40.4637	51.22	13	18	39.2966	56.1	14	22	41.8394
F1MA36	Spectrin beta 3 OS=Rattus norvegicus GN=Sptbn2 PE=4 SV=2 - [F1MA36_RAT]	63.32	120	131	1891	2388	270.849	5.8335	358.655	45.44	84	112	293.018	43.51	84	104	326.268	45.9	88	112	360.722	48.83	87	112	358.704	45.73	86	112	328.348	44.39	83	105	296.809	42.09	77	96	338.214	44.72	78	103	229.31	46.19	83	103	222.393	42.8	80	100	234.757
P62944	AP-2 complex subunit beta OS=Rattus norvegicus GN=Ap2b1 PE=1 SV=1 - [AP2B1_RAT]	63.29	30	52	770	937	104.486	5.37646	118.271	43.97	35	43	104.45	44.5	34	42	118.607	38.31	32	43	135.961	42.9	33	43	132.499	45.68	36	46	137.989	50.59	39	49	118.994	44.61	34	42	136.452	47.49	38	47	77.2499	40.02	31	40	86.445	38.21	30	37	89.1507
P06687	Sodium/potassium-transporting ATPase subunit alpha-3 OS=Rattus norvegicus GN=Atp1a3 PE=1 SV=2 - [AT1A3_RAT]	63.28	45	66	2250	1013	111.62	5.41455	324.409	50.64	47	105	377.022	51.23	50	124	421.209	52.32	53	134	399.42	51.92	51	119	421.344	52.22	51	127	412.236	55.38	54	130	442.227	54.89	53	139	489.084	59.92	62	149	288.738	51.83	51	122	236.874	48.37	44	102	289.215
P63012	Ras-related protein Rab-3A OS=Rattus norvegicus GN=Rab3a PE=1 SV=1 - [RAB3A_RAT]	63.18	7	14	310	220	24.9541	5.03369	50.2799	52.27	10	18	44.4841	51.36	9	18	49.5269	55.91	11	19	54.3862	55.91	11	19	51.4679	52.27	10	19	50.4194	55.91	11	19	53.0867	55.91	11	19	59.7034	59.55	13	20	22.8098	55.91	11	13	30.4405	55.91	11	16	31.493
P35213-2	Isoform Short of 14-3-3 protein beta/alpha OS=Rattus norvegicus GN=Ywhab - [1433B_RAT]	63.11	7	17	371	244	27.8047	4.88135	46.259	51.64	11	18	55.7715	51.64	12	21	50.1502	47.13	11	19	56.1031	47.54	12	20	54.9669	47.13	11	20	52.4995	56.56	12	20	64.6813	60.25	14	22	60.0465	59.43	12	23	36.3749	52.05	12	21	40.0486	54.92	13	23	36.1409
P62632	Elongation factor 1-alpha 2 OS=Rattus norvegicus GN=Eef1a2 PE=2 SV=1 - [EF1A2_RAT]	63.07	10	18	416	463	50.4223	9.02686	61.5792	45.36	12	19	71.3174	45.57	13	22	71.0227	49.03	14	25	94.7748	49.24	15	30	62.0239	38.44	11	17	71.699	53.35	14	23	109.216	47.73	13	29	72.9139	47.95	14	20	70.3242	52.92	14	26	46.5758	40.82	10	16	62.4651
P62630	Elongation factor 1-alpha 1 OS=Rattus norvegicus GN=Eef1a1 PE=2 SV=1 - [EF1A1_RAT]	62.99	8	19	490	462	50.0821	9.01221	87.0386	53.9	15	26	69.5385	53.03	14	23	99.7541	56.71	18	34	100.454	48.48	14	30	83.5136	48.48	15	24	82.1298	46.75	13	25	109.208	46.97	13	31	84.0904	55.41	15	25	76.8656	46.97	13	30	48.0767	45.24	14	24	74.0906
A0A096MKF7	Delta-aminolevulinic acid dehydratase OS=Rattus norvegicus GN=Alad PE=4 SV=2 - [A0A096MKF7_RAT]	62.96	1	1	5	27	3.11654	9.02686																					3.12657	62.96	1	1					0	62.96	1	1
D3ZZR9	Peptidyl-prolyl cis-trans isomerase OS=Rattus norvegicus GN=Fkbp2 PE=4 SV=1 - [D3ZZR9_RAT]	62.86	7	7	55	140	15.3782	8.88037	2.76387	10	1	1	5.21187	18.57	2	2	11.5356	49.29	4	4	8.87064	38.57	3	3	9.39176	33.57	4	4	11.8596	48.57	5	5	16.4729	48.57	5	5	9.07236	29.29	3	3	10.0419	32.86	5	5	4.84081	17.86	2	2	2.36941
G3V8Q2	Alpha-internexin OS=Rattus norvegicus GN=Ina PE=3 SV=1 - [G3V8Q2_RAT]	62.85	1	31	655	506	56.2237	5.19873	103.819	50.4	25	34	100.788	49.21	24	35	115.66	55.14	27	40	119.632	49.8	26	40	112.669	51.58	26	38	115.84	51.58	27	39	109.958	51.58	25	35	114.182	51.38	24	35	71.8883	59.09	26	35	78.8709	49.8	25	35	75.1912
Q8CFN2	Cell division control protein 42 homolog OS=Rattus norvegicus GN=Cdc42 PE=1 SV=2 - [CDC42_RAT]	62.83	1	9	168	191	21.245	6.55127	31.2363	57.07	8	11	25.5381	52.88	7	9	27.6551	48.17	7	10	31.7741	57.07	8	11	27.2802	51.31	7	10	30.3092	51.31	7	11	24.2061	47.12	6	8	28.0189	57.07	8	10	12.8698	52.88	7	8	3.05014	31.94	4	4	12.3467
P85834	Elongation factor Tu, mitochondrial OS=Rattus norvegicus GN=Tufm PE=1 SV=1 - [EFTU_RAT]	62.83	24	25	424	452	49.491	7.56201	68.4736	43.14	16	23	70.4462	43.14	16	24	81.3145	50.66	20	28	84.8491	43.81	18	26	84.3501	47.35	20	28	70.0371	45.58	18	25	71.9503	45.8	17	24	75.9304	48.01	19	26	53.2424	41.37	17	22	48.6887	43.14	17	23	37.0956
F1LPG5	Protein LOC691675 OS=Rattus norvegicus GN=LOC688963 PE=4 SV=1 - [F1LPG5_RAT]	62.79	7	7	107	129	15.055	9.81787	14.0221	37.98	3	6	12.8232	45.74	4	6	14.1607	37.98	3	5	11.3068	37.98	3	5	14.1498	37.98	3	5	18.9442	54.26	4	7	25.0813	55.04	5	8	22.7585	37.98	3	7	10.621	46.51	4	5	9.19584	46.51	4	7	7.7847
B2RYJ7	ARP1 actin-related protein 1 homolog B (Yeast) OS=Rattus norvegicus GN=Actr1b PE=2 SV=1 - [B2RYJ7_RAT]	62.77	6	17	223	376	42.2547	6.40479	30.728	36.44	10	12	28.2869	30.85	10	11	27.8033	30.85	10	12	35.7104	38.83	11	12	36.079	45.21	11	12	42.7155	41.22	10	14	39.2289	45.48	11	14	37.0396	43.09	12	15	22.932	36.44	9	11	24.8622	29.52	8	12	12.9604
P61589	Transforming protein RhoA OS=Rattus norvegicus GN=Rhoa PE=1 SV=1 - [RHOA_RAT]	62.69	3	12	216	193	21.7681	6.1001	35.4896	44.04	10	12	26.697	44.04	8	9	39.1014	62.69	11	14	39.9071	44.04	9	13	38.5155	40.93	9	13	33.1836	40.93	9	12	35.3851	36.27	8	13	39.226	59.59	9	12	28.2901	43.52	9	13	18.3565	37.82	8	9	23.7152
E9PT48	Microtubule-associated protein OS=Rattus norvegicus GN=Mapt PE=4 SV=1 - [E9PT48_RAT]	62.63	2	17	332	372	38.7685	8.646	50.1775	48.12	13	19	58.028	44.09	13	19	56.5136	50.27	14	20	62.7399	48.39	12	18	59.9259	46.24	12	18	50.0442	44.09	12	18	57.1442	48.12	13	19	68.8347	56.72	15	24	34.4763	43.82	10	15	38.0591	44.35	12	17	40.1618
P02688	Myelin basic protein OS=Rattus norvegicus GN=Mbp PE=1 SV=3 - [MBP_RAT]	62.56	2	18	617	195	21.489	11.2388	72.2718	47.18	13	34	82.4714	44.1	12	36	75.8908	44.1	12	33	80.6723	49.23	13	32	82.6103	52.31	14	32	74.9335	49.23	13	31	72.866	44.1	12	29	72.8947	49.23	12	28	56.6552	49.23	12	35	44.9589	53.33	12	33	59.5169
D3ZYX8	Cytochrome c oxidase subunit VIIa polypeptide 2 like (Predicted), isoform CRA_e OS=Rattus norvegicus GN=Cox7a2l PE=4 SV=1 - [D3ZYX8_RAT]	62.5	6	6	72	120	13.265	9.74463	8.64519	35	4	5	5.02938	28.33	3	3	5.42753	28.33	3	3	5.22025	48.33	4	4	4.95066	28.33	3	3	9.26873	55	5	5	7.25637	35	4	4	6.99921	35	4	5	6.98687	47.5	4	4	4.1224	16.67	2	2	8.50284
F7FKI5	Pyruvate dehydrogenase E1 component subunit alpha OS=Rattus norvegicus GN=Pdha1 PE=4 SV=1 - [F7FKI5_RAT]	62.31	1	26	375	390	43.2227	8.19189	60.3096	47.69	15	18	57.947	48.72	15	18	64.0733	51.03	18	22	67.7389	50	17	20	72.4429	51.79	17	22	69.1189	53.33	18	22	62.4306	45.38	15	20	73.7911	49.49	14	21	41.3867	53.33	17	21	44.4718	54.62	19	24	59.1354
M0R5B4	Uncharacterized protein OS=Rattus norvegicus PE=4 SV=1 - [M0R5B4_RAT]	62.14	3	17	1873	346	38.581	5.5542	369.943	59.54	14	97	366.084	48.55	13	106	394.281	59.54	14	110	412.836	48.55	13	110	405.782	59.54	14	103	400.256	48.27	12	109	400.837	59.83	15	103	444.309	61.56	16	116	354.401	60.12	15	110	237.287	60.12	15	82	320.053
Q9QXQ0	Alpha-actinin-4 OS=Rattus norvegicus GN=Actn4 PE=1 SV=2 - [ACTN4_RAT]	62.13	27	47	549	911	104.849	5.43994	69.7495	25.25	19	22	73.0741	27.88	21	25	81.243	29.75	22	25	94.5602	32.71	27	30	79.0261	33.81	26	29	90.8839	32.6	24	29	89.5628	35.46	24	28	94.0108	33.59	24	31	91.5583	47.75	35	41	65.0547	38.64	27	33	75.4132
A1L108	Actin-related protein 2/3 complex subunit 5-like protein OS=Rattus norvegicus GN=Arpc5l PE=1 SV=2 - [ARP5L_RAT]	62.09	6	6	100	153	16.9998	6.80029	23.7964	49.67	4	6	18.0759	53.59	5	5	28.086	62.09	6	8	18.5885	53.59	5	5	27.9756	53.59	5	7	22.919	62.09	6	7	22.5794	57.52	5	6	28.175	62.09	6	8	10.105	49.67	4	4	0	12.42	1	1	4.52482
D3ZCZ9	Protein LOC100912599 OS=Rattus norvegicus GN=LOC100912599 PE=4 SV=1 - [D3ZCZ9_RAT]	62.07	7	7	121	116	13.0317	9.21729	15.3026	52.59	5	6	16.5265	52.59	5	6	11.3068	50	4	4	20.2574	62.07	6	6	18.9515	62.07	6	6	16.4779	50	4	5	22.3424	62.07	6	7	19.4528	62.07	6	8	12.7417	62.07	7	8	11.8198	52.59	5	8	18.1872
P34058	Heat shock protein HSP 90-beta OS=Rattus norvegicus GN=Hsp90ab1 PE=1 SV=4 - [HS90B_RAT]	62.02	35	55	1082	724	83.2291	5.03369	138.274	48.9	38	57	124.575	49.72	37	55	139.939	53.18	40	58	172.424	51.8	39	62	153.949	48.48	37	56	181.032	56.91	43	70	207.726	58.01	43	75	218.118	57.87	43	77	104.638	55.52	38	53	100.917	45.86	32	46	114.28
G3V728	4-nitrophenylphosphatase domain and non-neuronal SNAP25-like protein homolog 1 (C. elegans), isoform CRA_b OS=Rattus norvegicus GN=Nipsnap1 PE=4 SV=1 - [G3V728_RAT]	61.97	13	14	264	284	33.325	9.37842	38.3717	51.76	9	14	41.4491	41.55	8	14	37.8091	41.9	9	14	40.4658	41.9	9	13	52.8112	48.94	11	17	52.1395	48.59	10	16	41.8004	42.61	9	13	50.6425	45.77	10	15	34.8776	51.41	10	15	27.1215	36.62	7	12	29.9706
Q5M7U6	Actin-related protein 2 OS=Rattus norvegicus GN=Actr2 PE=2 SV=1 - [ARP2_RAT]	61.93	22	23	288	394	44.7052	6.7417	46.7929	36.29	14	18	44.816	46.95	14	15	53.2165	40.61	14	18	51.126	39.09	13	16	52.6299	38.07	13	17	43.4351	40.61	12	14	49.7908	41.88	15	18	47.3435	46.19	16	18	36.3227	42.39	15	17	30.6064	37.56	11	13	38.9263
D4A5L9	Protein LOC690675 OS=Rattus norvegicus GN=LOC679794 PE=3 SV=1 - [D4A5L9_RAT]	61.9	11	11	259	105	11.628	9.5835	34.4161	59.05	8	13	39.4967	60	9	17	34.9164	60	9	17	44.3033	60	10	16	37.4378	60	10	16	26.3244	60	9	12	33.4557	60	10	12	35.5969	60	10	14	31.0354	60	10	16	18.1949	61.9	11	13	30.6733
Q3KRE3	Guanine nucleotide-binding protein subunit gamma OS=Rattus norvegicus GN=Gng10 PE=2 SV=1 - [Q3KRE3_RAT]	61.76	2	3	28	68	7.22477	7.85498	7.57742	61.76	3	3	3.78824	35.29	2	2	2.75983	35.29	2	2	7.0648	61.76	3	3	6.15073	35.29	2	2	1.79234	8.82	1	1	2.52285	35.29	2	2	2.29606	26.47	1	1	2.10795	26.47	1	1					2.68642
P30904	Macrophage migration inhibitory factor OS=Rattus norvegicus GN=Mif PE=1 SV=4 - [MIF_RAT]	61.74	3	5	84	115	12.4692	7.34229	15.4248	55.65	3	3	21.494	61.74	4	5	13.9702	53.91	4	5	19.9323	61.74	5	6	19.4714	55.65	4	5	24.1632	55.65	4	5	23.0845	61.74	4	5	19.9685	61.74	5	5	16.5658	55.65	3	4	16.7924	55.65	3	5	18.8566
P62747	Rho-related GTP-binding protein RhoB OS=Rattus norvegicus GN=Rhob PE=1 SV=1 - [RHOB_RAT]	61.73	9	11	152	196	22.1091	5.23682	17.9883	30.1	6	6	26.8264	36.22	7	9	26.3456	39.29	6	8	30.0862	45.41	7	9	34.499	35.71	7	11	23.1193	35.71	7	8	27.7731	37.24	7	9	36.6309	41.84	8	12	18.3416	35.71	7	8	20.4303	36.73	7	8	18.5245
P85515	Alpha-centractin OS=Rattus norvegicus GN=Actr1a PE=1 SV=1 - [ACTZ_RAT]	61.7	5	17	255	376	42.5869	6.63916	41.7157	30.32	10	15	31.2692	27.66	10	13	36.6689	32.18	11	15	51.8505	46.01	13	17	43.9682	38.56	11	15	50.1437	42.55	11	16	47.8165	39.36	11	16	45.0512	37.5	11	16	24.91	33.24	9	13	25.955	33.78	9	13	20.7717
A9UMV9	Ndufa7 protein OS=Rattus norvegicus GN=Ndufa7l PE=2 SV=1 - [A9UMV9_RAT]	61.61	8	8	50	112	12.4926	10.4771	7.27212	31.25	3	4	2.71776	8.04	1	1	4.94627	20.54	2	2	3.13067	8.04	1	1		0			5.01523	20.54	2	3	9.98922	32.14	4	4	14.4689	42.86	4	6	4.45901	30.36	3	3	6.26195	40.18	4	4	2.30909
Q4KLF8	Actin-related protein 2/3 complex subunit 5 OS=Rattus norvegicus GN=Arpc5 PE=1 SV=3 - [ARPC5_RAT]	61.59	6	6	50	151	16.3103	5.66846	8.06088	35.1	3	3	5.72813	17.22	3	3	1.6808	11.92	2	2	8.20658	35.1	3	3	3.5953	11.92	2	2	6.13752	20.53	3	3	4.07056	11.92	2	2	6.70351	20.53	3	3	8.57912	16.56	2	3	7.71871	29.14	3	3	7.73806
D4ABT0	Guanine nucleotide-binding protein G(o) subunit alpha OS=Rattus norvegicus GN=Gnao1 PE=4 SV=2 - [D4ABT0_RAT]	61.58	2	20	458	354	39.995	6.01123	69.9883	56.78	16	25	61.7464	55.08	15	23	64.7547	60.73	17	27	76.7101	59.04	17	27	77.2702	61.3	18	27	66.2666	56.78	17	26	75.0998	59.04	18	27	78.1305	59.04	17	29	43.7616	48.31	15	26	39.6857	54.24	15	21	42.6223
P04636	Malate dehydrogenase, mitochondrial OS=Rattus norvegicus GN=Mdh2 PE=1 SV=2 - [MDHM_RAT]	61.54	18	18	522	338	35.6608	8.67529	94.6297	58.28	15	30	79.8175	55.62	14	26	100.782	58.28	15	32	96.3835	52.66	13	28	103.96	58.28	15	31	89.3747	56.21	14	28	94.6457	58.28	15	30	100.232	55.92	16	31	79.0554	61.24	16	33	63.3282	56.8	15	26	60.7033
F1LVX3	Protein LOC102554591 OS=Rattus norvegicus GN=LOC102554591 PE=4 SV=2 - [F1LVX3_RAT]	61.48	13	14	111	270	31.1231	8.30908	14.5198	32.59	6	6	16.3349	34.81	5	5	20.6942	42.96	7	7	25.8587	38.15	7	8	19.2586	38.15	7	8	13.4454	30.37	4	4	20.0706	27.04	6	6	23.8774	33.33	6	7	11.374	27.41	7	8	11.2712	24.07	6	7	10.853
G3V6Y6	Alpha-1,4 glucan phosphorylase OS=Rattus norvegicus GN=Pygb PE=3 SV=1 - [G3V6Y6_RAT]	61.45	36	46	713	843	96.6765	6.75635	130.255	44.48	28	41	108.065	49.35	30	39	119.739	44.72	29	38	141.31	45.08	30	43	108.853	45.43	29	36	119.694	48.52	31	42	126.073	44.6	30	40	150.975	50.77	36	49	109.875	47.21	30	45	69.0904	36.65	24	31	92.4029
P46462	Transitional endoplasmic reticulum ATPase OS=Rattus norvegicus GN=Vcp PE=1 SV=3 - [TERA_RAT]	61.41	46	46	650	806	89.2927	5.26221	114.108	44.29	25	37	111.364	48.14	28	39	106.548	43.55	24	34	109.96	44.79	24	34	108.294	46.03	26	35	125.589	52.73	31	39	101.871	46.15	28	34	141.718	55.96	35	46	80.2366	47.89	28	33	73.3637	41.81	25	33	89.2089
P20171	GTPase HRas OS=Rattus norvegicus GN=Hras PE=1 SV=2 - [RASH_RAT]	61.38	3	10	67	189	21.2846	5.31299	10.0767	26.46	3	3	8.76216	24.34	3	3	7.93594	24.87	3	3	11.552	23.28	4	4	13.5986	30.69	4	4	12.3741	30.69	4	4	15.5417	25.93	3	4	14.1511	26.46	3	4	14.6387	31.22	5	6	13.6884	39.68	5	5	14.0011
E9PSV5	Phosphoserine aminotransferase OS=Rattus norvegicus GN=Psat1 PE=3 SV=2 - [E9PSV5_RAT]	61.35	20	20	317	370	40.4649	7.97217	51.8274	48.38	15	18	43.4668	45.95	14	17	56.1761	49.46	16	21	58.219	51.89	17	20	55.0011	49.73	16	19	44.3542	48.38	14	16	51.7232	46.76	15	17	60.1056	48.38	16	19	37.4525	42.97	14	18	27.0623	36.49	11	13	32.8216
Q63228	Glia maturation factor beta OS=Rattus norvegicus GN=Gmfb PE=1 SV=2 - [GMFB_RAT]	61.27	6	6	94	142	16.7255	5.43994	13.488	49.3	4	4	12.0146	49.3	4	4	12.2889	56.34	5	5	18.4053	49.3	4	5	15.9511	56.34	5	6	24.554	49.3	4	6	18.8767	56.34	5	5	21.9819	56.34	5	6	16.0152	49.3	4	5	9.57274	54.23	5	5	10.7882
P10818	Cytochrome c oxidase subunit 6A1, mitochondrial OS=Rattus norvegicus GN=Cox6a1 PE=1 SV=2 - [CX6A1_RAT]	61.26	4	4	176	111	12.2933	9.31982	18.7137	61.26	4	8	21.6337	61.26	4	11	24.8841	61.26	4	12	29.5951	61.26	4	12	17.2817	59.46	3	10	30.3072	61.26	4	11	26.4099	61.26	4	12	26.2379	61.26	4	11	6.28675	61.26	4	8	1.65726	61.26	4	7	4.67641
P62138	Serine/threonine-protein phosphatase PP1-alpha catalytic subunit OS=Rattus norvegicus GN=Ppp1ca PE=1 SV=1 - [PP1A_RAT]	61.21	5	19	273	330	37.4878	6.32861	50.8565	49.39	12	16	49.1276	54.55	14	17	50.6833	40.91	12	17	49.9119	36.36	11	16	51.9385	46.36	13	17	51.1917	59.39	14	17	44.5318	41.82	11	14	45.5689	41.82	11	15	46.744	46.67	12	16	36.5456	42.42	11	15	30.3192
Q08163	Adenylyl cyclase-associated protein 1 OS=Rattus norvegicus GN=Cap1 PE=1 SV=3 - [CAP1_RAT]	61.18	25	27	394	474	51.5565	7.51807	64.364	46.84	15	21	54.4764	46.2	14	20	49.9323	40.08	13	19	56.2213	39.87	13	18	73.5677	40.08	16	23	66.0582	44.73	16	24	74.7835	44.09	16	23	73.6745	41.98	14	21	57.1619	52.11	18	25	47.5751	51.05	17	23	41.3178
P19804	Nucleoside diphosphate kinase B OS=Rattus norvegicus GN=Nme2 PE=1 SV=1 - [NDKB_RAT]	61.18	4	10	263	152	17.2719	7.44482	35.7667	61.18	10	15	31.0539	61.18	9	15	34.9979	61.18	9	16	41.4876	61.18	9	16	35.4823	56.58	8	15	33.9971	50.66	7	13	33.4399	61.18	10	15	49.056	56.58	9	18	21.1932	47.37	8	14	15.8379	47.37	7	13	23.1198
Q62658	Peptidyl-prolyl cis-trans isomerase FKBP1A OS=Rattus norvegicus GN=Fkbp1a PE=1 SV=3 - [FKB1A_RAT]	61.11	7	7	292	108	11.9151	8.1626	54.191	59.26	6	15	53.3307	59.26	5	15	50.8382	59.26	6	15	60.7571	59.26	6	16	54.5372	59.26	6	15	56.2143	59.26	6	16	63.6951	61.11	7	17	62.9608	59.26	6	16	33.9917	61.11	6	16	32.1944	59.26	6	16	39.8443
Q99PD4	Actin-related protein 2/3 complex subunit 1A OS=Rattus norvegicus GN=Arpc1a PE=2 SV=1 - [ARC1A_RAT]	61.08	19	19	329	370	41.5727	8.17725	59.1556	52.7	14	20	47.2529	43.24	11	17	63.0227	52.43	14	20	66.2853	48.38	12	20	74.8193	55.14	15	24	52.3131	50.54	12	17	54.2918	41.89	12	18	60.616	52.43	12	20	32.1462	37.57	11	16	37.3038	44.05	13	17	32.3286
Q5RKI0	WD repeat-containing protein 1 OS=Rattus norvegicus GN=Wdr1 PE=1 SV=3 - [WDR1_RAT]	61.06	29	29	561	606	66.1399	6.62451	103.123	51.98	18	29	103.986	52.97	19	32	111.684	52.97	19	32	127.519	50.99	20	35	126.747	52.97	19	31	96.9913	49.83	18	28	108.858	52.64	20	31	118.958	56.11	22	32	65.1871	49.01	18	29	70.3641	56.93	24	36	59.1563
D4A1G4	Cytochrome b5 OS=Rattus norvegicus GN=Cyb5a PE=3 SV=1 - [D4A1G4_RAT]	61	5	5	32	100	11.4747	5.70654					1.82413	12	1	1	2.11529	13	1	2	2.03947	13	1	1	2.053	13	1	1	2.62933	13	1	2	5.76635	52	4	4	7.31054	25	2	3	0	40	3	3	2.62308	18	2	2	3.30302
F1LNF1	Heterogeneous nuclear ribonucleoproteins A2/B1 (Fragment) OS=Rattus norvegicus GN=Hnrnpa2b1 PE=4 SV=1 - [F1LNF1_RAT]	60.8	17	21	471	352	37.2747	9.0708	64.4556	51.42	17	29	55.0779	41.19	15	26	69.4467	46.02	16	27	93.5565	48.86	16	30	84.8175	48.86	17	28	70.0414	48.86	17	28	82.9674	46.88	17	30	88.9861	52.84	18	32	28.3855	40.63	13	18	40.9873	44.89	15	23	39.1689
P70580	Membrane-associated progesterone receptor component 1 OS=Rattus norvegicus GN=Pgrmc1 PE=1 SV=3 - [PGRC1_RAT]	60.51	8	10	85	195	21.5847	4.60205	11.4321	12.31	3	4	17.8107	31.28	5	6	14.8007	25.64	5	6	15.768	25.64	5	6	13.6096	15.38	4	5	19.1258	35.38	6	7	6.83387	7.69	1	2	19.2442	46.15	7	7	4.91297	15.38	3	3	4.62765	12.31	2	2	8.64155
O35077	Glycerol-3-phosphate dehydrogenase [NAD(+)], cytoplasmic OS=Rattus norvegicus GN=Gpd1 PE=1 SV=4 - [GPDA_RAT]	60.46	19	21	286	349	37.4282	6.59521	43.0441	48.14	12	16	39.6744	48.14	13	17	43.07	42.41	13	17	49.5665	52.15	13	18	40.3122	52.44	14	17	44.3338	39.83	12	15	32.4618	40.4	10	12	38.016	34.1	10	13	23.0893	44.99	12	16	20.017	36.1	13	16	29.886
P49432	Pyruvate dehydrogenase E1 component subunit beta, mitochondrial OS=Rattus norvegicus GN=Pdhb PE=1 SV=2 - [ODPB_RAT]	60.45	17	17	361	359	38.957	6.65381	61.2004	55.99	15	21	61.0211	52.92	13	20	60.545	57.1	14	21	69.0551	60.45	16	22	64.9091	57.1	15	20	77.6184	57.1	15	23	65.4198	52.92	14	20	62.3294	51.53	14	19	41.6492	46.24	11	19	41.286	50.7	14	17	35.1661
Q5U300	Ubiquitin-like modifier-activating enzyme 1 OS=Rattus norvegicus GN=Uba1 PE=1 SV=1 - [UBA1_RAT]	60.4	45	45	701	1058	117.713	5.56689	107.161	40.93	30	38	115.15	38.75	28	40	130.021	45.46	32	43	120.659	42.34	31	39	122.377	37.24	29	40	121.885	46.88	32	41	121.64	39.04	30	39	121.35	41.21	32	41	100.881	42.06	31	41	75.4582	34.5	25	31	95.5742
Q5M7A7	CB1 cannabinoid receptor-interacting protein 1 OS=Rattus norvegicus GN=Cnrip1 PE=1 SV=1 - [CNRP1_RAT]	60.37	8	8	169	164	18.6466	7.85498	31.9356	56.71	7	10	32.9931	51.83	6	10	35.9559	56.71	7	12	33.1026	51.83	6	10	36.5924	56.71	7	11	31.8473	48.17	5	10	30.2117	50	6	8	30.082	51.83	6	9	25.6516	51.83	6	9	22.2662	56.71	7	10	28.7764
B2RYS2	Cytochrome b-c1 complex subunit 7 OS=Rattus norvegicus GN=LOC685596 PE=2 SV=1 - [B2RYS2_RAT]	60.36	12	12	215	111	13.5499	9.30518	23.6817	54.95	8	12	26.6204	54.95	8	12	23.958	54.95	8	12	28.4225	46.85	8	13	26.665	46.85	7	10	30.4594	60.36	10	14	35.7248	54.05	10	16	28.2248	51.35	9	14	21.0784	46.85	8	11	16.8646	46.85	8	10	16.2518
P05708	Hexokinase-1 OS=Rattus norvegicus GN=Hk1 PE=1 SV=4 - [HXK1_RAT]	60.13	11	59	866	918	102.342	6.7124	124.386	43.25	34	44	123.991	46.19	39	50	130.723	40.09	33	47	130.69	37.15	34	44	135.476	37.8	34	45	142.557	37.8	35	48	189.221	41.39	40	62	183.243	42.7	42	59	81.8652	44.34	36	43	86.2752	38.67	32	42	99.9472
P34926	Microtubule-associated protein 1A OS=Rattus norvegicus GN=Map1a PE=1 SV=1 - [MAP1A_RAT]	60.13	4	121	1797	2774	299.348	4.94482	331.84	39.94	72	107	309.724	39.73	71	103	312.502	41.06	74	105	322.244	39.26	70	102	332.048	41.56	74	103	315.643	39.55	71	99	303.21	38.57	70	98	347.289	41.64	75	108	195.416	44.99	74	94	191.404	37.13	74	98	171.906
P84092	AP-2 complex subunit mu OS=Rattus norvegicus GN=Ap2m1 PE=1 SV=1 - [AP2M1_RAT]	60	24	24	347	435	49.623	9.53955	40.8521	32.41	13	19	49.4566	38.39	17	22	37.7123	42.76	16	20	44.2525	32.87	13	17	41.1647	35.63	14	18	41.0561	39.77	15	19	52.3254	45.75	17	23	48.0036	40	15	22	29.6616	38.39	17	20	36.9979	45.29	18	21	24.3688
Q5BJP3	Ubiquitin-fold modifier 1 OS=Rattus norvegicus GN=Ufm1 PE=3 SV=1 - [UFM1_RAT]	60	3	3	18	85	9.11187	9.30518						0				0				0			1.62156	9.41	1	1	2.15226	17.65	1	1	1.71739	17.65	1	1	1.82683	17.65	1	1	1.77544	27.06	2	2	1.98747	27.06	2	2	1.87554
P07943	Aldose reductase OS=Rattus norvegicus GN=Akr1b1 PE=1 SV=3 - [ALDR_RAT]	59.81	16	17	238	316	35.7743	6.7124	33.4099	42.41	11	14	28.6747	34.18	8	13	26.0657	43.04	11	14	27.479	33.54	8	10	37.7782	42.09	11	15	36.2972	45.57	12	16	32.6378	44.3	12	15	34.0677	45.25	12	14	16.0474	36.71	10	13	4.62278	29.75	7	11	19.7867
Q9JHY2	Sideroflexin-3 OS=Rattus norvegicus GN=Sfxn3 PE=2 SV=1 - [SFXN3_RAT]	59.81	13	15	216	321	35.4106	9.74463	33.6456	38.94	9	11	23.5975	26.79	7	9	17.8771	25.55	8	9	32.2709	30.84	9	12	27.6555	30.84	9	11	38.5473	34.89	9	13	40.9813	39.56	11	15	19.6915	27.73	9	10	27.8239	39.25	11	15	16.7032	46.11	10	10	31.4461
Q5XI34	Protein Ppp2r1a OS=Rattus norvegicus GN=Ppp2r1a PE=2 SV=1 - [Q5XI34_RAT]	59.76	33	33	502	589	65.2809	5.10986	81.6262	48.73	23	31	72.4335	38.03	19	27	80.6878	50.25	25	31	93.4023	44.48	22	29	82.8964	41.77	20	26	91.2901	42.78	20	29	84.461	39.73	21	30	81.4907	44.31	22	30	55.4956	40.75	20	27	52.516	33.79	17	25	52.381
P52481	Adenylyl cyclase-associated protein 2 OS=Rattus norvegicus GN=Cap2 PE=2 SV=1 - [CAP2_RAT]	59.75	27	29	344	477	52.8791	7.1665	53.8221	44.23	16	20	57.3269	46.33	17	21	54.3505	45.91	17	20	63.9375	47.8	17	21	52.4348	44.65	17	20	54.5017	44.23	16	20	43.5497	37.11	15	16	46.7587	41.3	15	18	41.8805	48.85	21	23	33.3116	41.72	17	17	22.9759
P11348	Dihydropteridine reductase OS=Rattus norvegicus GN=Qdpr PE=1 SV=1 - [DHPR_RAT]	59.75	10	10	102	241	25.5359	7.81104	19.6069	34.44	6	6	8.59874	14.94	3	3	20.0133	37.76	6	6	16.9341	31.54	5	5	12.0771	14.94	3	4	7.60046	14.94	3	3	6.32503	12.03	2	2	13.258	24.9	4	4	22.9778	46.06	8	9	14.5883	33.2	5	6	20.2494
Q561S0	NADH dehydrogenase [ubiquinone] 1 alpha subcomplex subunit 10, mitochondrial OS=Rattus norvegicus GN=Ndufa10 PE=1 SV=1 - [NDUAA_RAT]	59.72	18	18	265	355	40.4676	7.79639	46.6046	50.99	13	16	53.4861	50.99	13	17	46.0464	48.17	11	15	52.137	48.45	12	16	63.4795	41.41	11	19	43.1568	43.94	12	15	57.4969	52.39	13	17	43.4682	36.34	11	13	31.737	43.38	10	13	24.8222	40.56	10	12	35.9558
O08557	N(G),N(G)-dimethylarginine dimethylaminohydrolase 1 OS=Rattus norvegicus GN=Ddah1 PE=1 SV=3 - [DDAH1_RAT]	59.65	13	14	79	285	31.4059	6.12549	9.83572	17.54	4	4	10.767	16.84	4	5	10.0678	16.49	3	4	7.68565	14.39	4	4	15.2817	34.39	7	7	7.77153	18.6	4	4	1.99732	6.32	2	2	10.65	23.16	4	4	10.0308	28.42	7	7	8.35704	27.02	6	6	10.7653
Q5PQN0	Neurocalcin-delta OS=Rattus norvegicus GN=Ncald PE=1 SV=3 - [NCALD_RAT]	59.59	5	12	146	193	22.2309	5.35107	17.9351	40.41	9	11	19.6169	34.72	9	10	15.2319	40.41	8	9	16.9869	36.79	8	8	22.6327	40.41	9	12	18.6068	30.57	8	8	9.76006	20.73	5	5	18.5163	24.35	6	9	12.4393	43.52	8	9	7.85037	26.42	5	5	6.59608
P11240	Cytochrome c oxidase subunit 5A, mitochondrial OS=Rattus norvegicus GN=Cox5a PE=1 SV=1 - [COX5A_RAT]	59.59	10	10	191	146	16.1193	6.53662	33.7284	58.22	8	13	25.9121	37.67	7	11	27.2435	37.67	7	11	32.6034	37.67	7	12	31.8971	33.56	6	11	31.3506	33.56	6	10	32.5979	59.59	7	12	34.9507	39.04	6	11	9.75092	59.59	7	9	12.3556	39.04	6	7	16.8066
[truncated: 3,799 more rows]
[truncated: 7 more columns]

## Sheet: Meam+SD
Accession	Group mean_Naive	Group_mean_Sham	Group_SD_Naive	Group_SD_Sham	p_value_Naive vs.Sham	fold change_Naive vs.Sham	log2 fold change_Naive vs.Sham	Group mean_Sham	Group_mean_MCAO	Group_SD_Sham	Group_SD_MCAO	p_value_Sham vs.MCAO	fold change_Sham vs.MCAO	log2 fold change_Sham vs.MCAO	Group mean_MCAO	Group_mean_MCAO+DHI	Group_SD_MCAO	Group_SD_MCAO+DHI	p_value_MCAO vs.MCAO+DHI	fold change_MCAO vs.MCAO+DHI	log2 fold change_MCAO vs.MCAO+DHI
[truncated: 280 more rows]

[truncated: 5 more sheets: GO for Part one, GO for Part two, Cluster for Part one, Cluster for Part two, STRING for Candidates]
